# Supplementary material for: Functionathon: a manual data mining workflow to generate functional hypotheses for uncharacterized human proteins and its application by undergraduate students
Source: Database (Oxford). 2021 Jul 28;2021:baab046. doi: 10.1093/database/baab046 (PMC8317215; doi:10.1093/database/baab046)
Supplement: baab046_Supp [file baab046_supp.zip]

Archive with 10 entries (10 files):
- Legends for Supp Files.docx
- Supp_File_S1.pdf
- Supp_File_S2.pdf
- Supp_File_S3.txt
- Table S1.xlsx
- Table S2.xlsx
- Table S3.xlsx
- Table S4.xlsx
- Table S5.xlsx
- Table S6.xlsx
