# Supplementary material for: Functionathon: a manual data mining workflow to generate functional hypotheses for uncharacterized human proteins and its application by undergraduate students
Source: Database (Oxford). 2021 Jul 28;2021:baab046. doi: 10.1093/database/baab046 (PMC8317215; doi:10.1093/database/baab046)
Supplement: baab046_Supp [file baab046_supp.zip › Table S1.xlsx]

## Sheet: Sheet1
Database/Tool	Website
Proteins and genes
UniProtKB	https://www.uniprot.org/
Model organism datatabase
Araport	https://www.araport.org/
FlyBase	http://flybase.org/
IMPC	https://www.mousephenotype.org/
Mouse Genome Informatics	http://www.informatics.jax.org/
neXtProt	https://www.nextprot.org/
SGD	https://www.yeastgenome.org/
TAIR	https://www.arabidopsis.org/
WormBase	https://wormbase.org/#012-34-5
Xenbase	http://www.xenbase.org/entry/
ZFIN	https://zfin.org/
Phylogenetic databases
eggNOG	http://eggnog5.embl.de/#/app/home
OMAdb	https://omabrowser.org/oma/home/
TreeFam	http://www.treefam.org/
Protein and gene expression databases and tools
GENEVESTIGATOR	https://genevestigator.com/gv/
SEEK	http://seek.princeton.edu/
The Human Protein Atlas	https://www.proteinatlas.org/
Overrepresentation analysis
PANTHER	http://www.pantherdb.org/
Similarity search and structure prediction tools
BLASTp, tBLASTn, psiBLAST	https://blast.ncbi.nlm.nih.gov/Blast.cgi
HHPRED	https://toolkit.tuebingen.mpg.de
Swiss-Model	https://swissmodel.expasy.org/
Protein domains, families, functional sites
InterPro	https://www.ebi.ac.uk/interpro/
Multiple sequence alignment
CLUSTAL	https://www.ebi.ac.uk/Tools/msa/
Multiple sequence alignment edition
Jalview	www.jalview.org/
Transmembrane prediction
Phobius	http://phobius.sbc.su.se/
TMHMM	http://www.cbs.dtu.dk/services/TMHMM/
N-terminal sorting signal prediction
iPSORT	http://ipsort.hgc.jp/
SignalP-5.0	http://www.cbs.dtu.dk/services/SignalP/index.php
TargetP2	http://www.cbs.dtu.dk/services/TargetP/
Subcellular localization prediction
DeepLoc	http://www.cbs.dtu.dk/services/DeepLoc/
LocNES	http://prodata.swmed.edu/LocNES/LocNES.php
MitoProtII	https://ihg.gsf.de/ihg/mitoprot.html
netNES	http://www.cbs.dtu.dk/services/NetNES/
NLStradamus	http://www.moseslab.csb.utoronto.ca/NLStradamus/
SecNLS	http://mleg.cse.sc.edu/seqNLS/
SecretomeP-2.0	http://www.cbs.dtu.dk/services/SecretomeP/
WolfpSORT	https://wolfpsort.hgc.jp/
Literature
Google Scholar	https://scholar.google.com/
PubMed	https://pubmed.ncbi.nlm.nih.gov/
PubMed Central (PMC)	https://www.ncbi.nlm.nih.gov/pmc/
Ontology
AmiGO	http://amigo.geneontology.org/amigo
Ontology Lookup Service	https://www.ebi.ac.uk/ols/index
QuickGO	https://www.ebi.ac.uk/QuickGO/
