# Supplementary material for: Functionathon: a manual data mining workflow to generate functional hypotheses for uncharacterized human proteins and its application by undergraduate students
Source: Database (Oxford). 2021 Jul 28;2021:baab046. doi: 10.1093/database/baab046 (PMC8317215; doi:10.1093/database/baab046)
Supplement: baab046_Supp [file baab046_supp.zip › Table S2.xlsx]

## Sheet: Data
Gene name and specie	Accession number	UniProtKB and neXtProt	WoLF PSORT	DeepLoc1.0	NLStradamus	seqNLS	netNES	LocNES	iPSORT	TargetP2	MitoProt II	SignalP-5.0	SecretomeP-2.0	TMHMM	Phobius	big-PI Predictor
C6orf118
H. sapiens	Q5T5N4	-	cytoplasm: 18.5, nucleus: 10, cytoplasm_mitochondria: 10	Soluble (0.98); Cytoplasm 0.66 Nucleus 0.34	156 - 175	159- 175	no	no	NA	NA	NA	NA	NA	NA	NA	NA
M. musculus	Q3TTN6	-	cytoplasm: 18.5, cytoplasm_nucleus: 15.83, cytoplasm_golgi: 11.33, nucleus: 9	Soluble (0.98); Cytoplasm 0.67 Nucleus 0.32	no	no	no	no	NA	NA	NA	NA	NA	NA	NA	NA
X. laevis	A0A1L8G278	-	cytoplasm: 21.5, cytoplasm_nucleus: 15.5, nucleus: 8.5	Soluble (0.97); Cytoplasm 0.77 Nucleus 0.20	no	no	429- 437	no	NA	NA	NA	NA	NA	NA	NA	NA
X. tropicalis	F6QEB3	-	cytoplasm: 22, nucleus: 6	Soluble (0.98); Cytoplasm 0.58 Nucleus 0.41	no	no	no	no	NA	NA	NA	NA	NA	NA	NA	NA
C7orf25
H sapiens	Q9BPX7	-	cytoplasm: 20, cytoplasm_nucleus: 13, pero: 5	Soluble (0.87); Cytoplasm (0.64)	no	no	no	no	NA	NA	NA	NA	NA	NA	NA	NA
M. musculus	Q91WD4	-	cytoplasm: 23, cytoplasm_nucleus: 16.5, nucleus: 8	Soluble (0.89); Cytoplasm (0.69), Nucleus (0.23)	no	no	no	no	NA	NA	NA	NA	NA	NA	NA	NA
G. gallus	A0A1D5P7R3	-	nucleus: 16.5, cytoplasm_nucleus: 14.5, cytoplasm: 11.5	Soluble (0.88); Cytoplasm (0.63), Nucleus (0.25)	no	no	no	no	NA	NA	NA	NA	NA	NA	NA	NA
D. rerio	Q803H0	-	cytoplasm: 18.5, cytoplasm_nucleus: 11, pero: 7	Soluble (0.86); Cytoplasm (0.57), Nucleus (0.34)	no	no	no	no	NA	NA	NA	NA	NA	NA	NA	NA
X. tropicalis	Q5BKL1	-	cytoplasm_nucleus: 16, nucleus: 14, cytoplasm: 14	Soluble (0.90); Cytoplasm (0.66), Nucleus (0.23)	no	no	no	no	NA	NA	NA	NA	NA	NA	NA	NA
C. elegans	Q19987	-	cytoplasm: 18.5, cytoplasm_nucleus: 16.3333, cytoplasm_pero: 11.5, nucleus: 8	Soluble (0.78); Cytoplasm (0.49), Nucleus (0.28)	no	no	no	no	NA	NA	NA	NA	NA	NA	NA	NA
R. microsporus	A0A1X0R3Z4	-	nucleus: 12, cytoplasm: 8, cysk: 5,	Soluble (0.97); Cytoplasm (0.70), Nucleus (0.21)	no	no	no	no	NA	NA	NA	NA	NA	NA	NA	NA
A. thaliana	A0A654EZB8	-	cytoplasm: 7	Soluble (0.84); Cytoplasm (0.52), Nucleus (0.34)	no	no	no	no	NA	NA	NA	NA	NA	NA	NA	NA
Cxorf58
H. sapiens	Q96LI9	-	mitochondria: 21.5, mitochondria_nucleus: 13.5, cytoplasm: 5	Soluble (0.92); Cytoplasm (0.58), Nucleus (0.31)	no	9-25	no	no	yes	yes	yes	NA	NA	NA	NA	NA
M. musculus	A0A5F8MPE6	-	nucleus: 26	Soluble (094); Nucleus (0.60), Cytoplasm (0.39)	29-39, 278-309	278-294	no	no	no	no	no	NA	NA	NA	NA	NA
X. tropicalis	F6YKV3	-	cytoplasm: 12.5, cytoplasm_nucleus: 12.5, nucleus: 9.5, extracellular: 7	Soluble (0.61); Plastid (0.48), Nucleus (0.21)	294-300	no	no	no	no	no	no	NA	NA	NA	NA	NA
RSRP1
H. sapiens	Q9BUV0	-	nucleus: 28.5, cytoplasm_nucleus: 16	Soluble (0.92); Nucleus 0.99	35 - 124	67-91, 102-118	170-178	no	NA	NA	NA	NA	NA	NA	NA	NA
M. musculus	Q3UC65	-	nucleus: 30	Soluble (0.89); Nucleus 0.99	35 - 134, 162-177	67-86, 113-129	182-190	no	NA	NA	NA	NA	NA	NA	NA	NA
G.gallus	A0A3Q2U4I5	-	nucleus: 29.5, cytoplasm_nucleus: 15.5	Soluble (0.83); Nucleus 0.99	138-222	4-20	no	no	NA	NA	NA	NA	NA	NA	NA	NA
D.rerio	Q1ECZ9	-	nucleus: 29	Soluble (0.92); Nucleus 0.99	88-181	115-131, 222-232	no	no	NA	NA	NA	NA	NA	NA	NA	NA
SMLR1
H. sapiens	H3BR10	TM: 19–39; TM: 53-73	extracellular: 26.5, extracellular_plasma membrane: 14.5	Membrane (0.98); ER 0.49 Golgi apparatus 0.31	NA	NA	NA	NA	NA	NA	NA	NA	no	NA	NA	NA
M. musculus	J3QMJ4	TM: 12-26	extracellular: 24, plasma membrane: 5	Membrane (0.97); ER 0.57 Cell membrane 0.19	NA	NA	NA	NA	NA	NA	NA	NA	no	NA	NA	NA
X. tropicalis	XR_208637.4	NA	extracellular: 17, mitochondria: 7	Membrane (0.97); ER 0.67	NA	NA	NA	NA	NA	NA	NA	no	no	TM: 15-36	TM: 15-36	NA
G. gallus	XR_211919.3	NA	extracellular: 16, mitochondria: 6, E.R.: 6	Membrane (0.98); ER 0.79	NA	NA	NA	NA	NA	NA	NA	no	no	TM: 15-37	TM: 17-38	NA
D. rerio	XR_222668.4	NA	extracellular: 30	Membrane (0.86); Endoplasmic reticulum (0.62)	NA	NA	NA	NA	NA	NA	NA	no	no	TM: 11- 33	TM: 12- 33	NA
TMEM53
H. sapiens	Q6P2H8	TM: 171-191	plasma membrane: 30	Membrane (0.94); Peroxisome 0.45 ER 0.41	NA	NA	NA	NA	NA	NA	NA	NA	NA	NA	NA	no
M. musculus	Q9D0Z3	TM: 170-190	plasma membrane: 30	Membrane (0.93); Peroxisome 0.50 ER 0.28	NA	NA	NA	NA	NA	NA	NA	NA	NA	NA	NA	no
G. gallus	A0A1L1RPU6	TM: 190-210	plasma membrane: 17, mitochondria: 9	Membrane (0.87); Mitochondrion 0.83	NA	NA	NA	NA	NA	NA	NA	NA	NA	NA	NA	no
X. laevis (A)	Q5PPS7	TM: 165-185	plasma membrane: 30	Membrane (0.92); Peroxisome 0.42 ER 0.32	NA	NA	NA	NA	NA	NA	NA	NA	NA	NA	NA	no
X. laevis (B)	Q6DJC8	TM: 165-185	plasma membrane: 32	Membrane (0.94); Peroxisome 0.49 ER 0.3	NA	NA	NA	NA	NA	NA	NA	NA	NA	NA	NA	no
X. tropicalis	A9JSB6	TM: 169-189	plasma membrane: 30	Membrane (0.94); Peroxisome 0.6 ER 0.24	NA	NA	NA	NA	NA	NA	NA	NA	NA	NA	NA	no
D. rerio	Q6DHN0	TM: 165-185	plasma membrane: 12, extracellular: 5	Membrane (0.76); Peroxisome 0.56	NA	NA	NA	NA	NA	NA	NA	NA	NA	NA	NA	no
C. elegans	Q9TZH8	-	cytoplasm: 15, mitochondria: 13, E.R._mitochondria: 8.83, mitochondria_peroxisome: 7.5	Membrane (0.61); Mitochondrion 0.97	NA	NA	NA	NA	NA	NA	NA	NA	NA	NA	NA	no
C. elegans	Q17846	-	cytoplasm: 14, mitochondria: 14, E.R._mitochondria: 9.33, mitochondria_peroxisome: 8	Membrane (0.79); Plastid 0.58 Mitochondrion 0.36	NA	NA	NA	NA	NA	NA	NA	NA	NA	NA	NA	no
C. elegans	Q22750	-	plasma membrane: 21, cytoplasm: 5, mitochondria: 4	Membrane (0.82); Mitochondrion 0.44 Plastid 0.39	NA	NA	NA	NA	NA	NA	NA	NA	NA	NA	NA	no
D. melanogaster	A1Z6G9	-	plasma membrane: 30	Membrane (0.51); Plastid 0.99	NA	NA	NA	NA	NA	NA	NA	NA	NA	NA	NA	no
A. thaliana	Q8S8G6	-	chloroplast: 11	Membrane (0.67); Plastid 0.75 Mitochondrion 0.25	NA	NA	NA	NA	NA	NA	NA	NA	NA	NA	NA	no
TMEM232
H. sapiens	C9JQI7	TM: 168-188; TM: 353-373	cytoplasm: 18.5, cytoplasm_mitochondria: 10, nucleus: 8.	Soluble (0.92); Cytoplasm 0.67 Nucleus 0.22	NA	NA	NA	NA	NA	NA	NA	NA	NA	NA	NA	NA
M. musculus	Q5K6N0	TM: 163-183	plasma membrane: 11, nucleus: 11, cytoplasm: 6	Soluble (0.93); Cytoplasm 0.67 Nucleus 0.28	NA	NA	NA	NA	NA	NA	NA	NA	NA	NA	NA	NA
X. laevis	A0A1L8I1Q0	-	cytoplasm: 10, cytoplasm_nucleus: 9.5, mitochondria: 8.5, E.R._mitochondria: 8.5, nucleus: 7, E.R.: 5.5	Soluble(0.95); Cytoplasm 0.74 Nucleus 0.18;	NA	NA	NA	NA	NA	NA	NA	NA	NA	NA	NA	NA
D. rerio	A5WVS1	-	cytoplasm: 11.5, cytoplasm_plasma membrane: 7.5, nucleus: 6, peroxisome: 6, mitochondria_peroxisome: 5	Soluble (0.92); Cytoplasm 0.63 Nucleus 0.33	NA	NA	NA	NA	NA	NA	NA	NA	NA	NA	NA	NA
