# Supplementary material for: Functionathon: a manual data mining workflow to generate functional hypotheses for uncharacterized human proteins and its application by undergraduate students
Source: Database (Oxford). 2021 Jul 28;2021:baab046. doi: 10.1093/database/baab046 (PMC8317215; doi:10.1093/database/baab046)
Supplement: baab046_Supp [file baab046_supp.zip › Table S3.xlsx]

## Sheet: C6orf118 Human RNA-seq
(log2 scale)			Gene Symbol	C6orf118	C6orf118	C6orf118	C6orf118	C6orf118	C6orf118	C6orf118
			Gene	ENSG00000112539	ENSG00000112539	ENSG00000112539	ENSG00000112539	ENSG00000112539	ENSG00000112539	ENSG00000112539
			Measure	ENSG00000112539	ENSG00000112539	ENSG00000112539	ENSG00000112539	ENSG00000112539	ENSG00000112539	ENSG00000112539
			Signal Background	0	0	0	0	0	0	0
			Expression Potential	5.53053	5.53053	5.53053	5.53053	5.53053	5.53053	5.53053
Path to root	Anatomy	Description	# samples	Mean value	Standard Error	Median Value	Lower Whisker	Lower Quartile	Upper Quartile	Upper Whisker
bronchiolar (small airway) epithelium cell > bronchiolar (small airway) mucosa cell > bronchiolar (small airway) cell > bronchoalveolar system cell > lung cell > respiratory system cell > Cell type	bronchiolar (small airway) epithelium cell	----	22	8.65106	0.105516	8.77353	7.6777	8.39803	9.06371	9.43777
bronchial (primary, main stem) epithelium cell > bronchial (primary, main stem) mucosa cell > bronchus (primary, main stem) cell > large airway cell > bronchoalveolar system cell > lung cell > respiratory system cell > Cell type	bronchial (primary, main stem) epithelium cell	----	196	5.484	0.214556	7.22386	0	2.58049	7.45976	8.06036
pulmonary (lung) epithelium cell > pulmonary (lung) mucosa cell > lung cell > respiratory system cell > Cell type	pulmonary (lung) epithelium cell	----	85	6.46213	0.0483065	6.45228	5.60003	6.26344	6.77682	7.33686
tracheal epithelium cell > tracheal mucosa cell > trachea cell > respiratory system cell > Cell type	tracheal epithelium cell		57	4.93472	0.285355	5.69402	3.90459	4.4977	6.27016	7.20697
bronchial epithelium cell 3D culture > Organotypic / 3D culture	bronchial epithelium cell 3D culture	The 3D culture consists of primary human bronchial epithelial cells.	126	4.38095	0.177623	5.19216	0.144735	3.47553	5.7676	6.51804
oviduct (fallopian tube) > female reproductive system > reproductive system > Tissue	oviduct (fallopian tube)		10	4.09841	0.731991	4.58384	0.968954	1.93234	6.36739	7.09773
fetal glia progenitor cell > fetal brain cell > fetal cell > gestational structure cell > Cell type	fetal glia progenitor cell		7	4.31814	0.363454	4.32064	3.11126	3.2667	5.25272	5.28476
testis (male gonad) > male reproductive system > reproductive system > Tissue	testis (male gonad)		147	4.02743	0.0695153	4.21039	2.43893	3.70743	4.60524	5.35923
tumor derived astrocyte > astrocyte (unspecified) > astrocyte > glia cell > central nervous system cell > nervous system cell > Cell type	tumor derived astrocyte		3	3.36699	0.448795	3.66335	2.48507	2.48507	3.95255	3.95255
neural progenitor cell > central nervous system cell > nervous system cell > Cell type	neural progenitor cell		7	3.26672	0.29721	3.51586	1.75766	2.86722	3.65516	4.26149
pituitary anterior lobe (adenohypophysis) > pituitary gland (hypophysis) > endocrine system (except testis and ovary) > Tissue	pituitary anterior lobe (adenohypophysis)		11	3.04135	0.413099	3.34223	0.806531	1.27432	4.15069	4.47814
pituitary gland (hypophysis) > endocrine system (except testis and ovary) > Tissue	pituitary gland (hypophysis)		64	3.12066	0.126202	3.19719	1.10935	2.53962	3.98393	5.06205
bronchoalveolar system cell > lung cell > respiratory system cell > Cell type	bronchoalveolar system cell	----	23	2.78597	0.112319	2.92689	1.98532	2.37731	3.29506	3.53386
endometrial organoid culture > Organotypic / 3D culture	endometrial organoid culture	Three-dimensional (3D) organoid culture from human endometrium.	15	2.73632	0.43815	2.83962	0.141003	1.00489	4.23574	4.99422
optic chiasma > diencephalon > forebrain (prosencephalon) > brain (encephalon) > central nervous system (CNS) > nervous system > Tissue	optic chiasma		8	2.70558	0.168433	2.77934	1.88315	2.63923	3.1958	3.31084
nasal mucosa > nose > sensory organ system > Tissue	nasal mucosa		56	2.35259	0.198198	2.47781	0	1.14523	3.56037	4.60908
corpus callosum > cerebral white matter > cerebral hemisphere > telencephalon (cerebrum) > forebrain (prosencephalon) > brain (encephalon) > central nervous system (CNS) > nervous system > Tissue	corpus callosum		10	2.17352	0.337213	2.28205	1.93629	1.93629	2.60579	3.50304
fetal lung > fetus > fetal tissue / fluid > gestational structure > Tissue	fetal lung		9	2.06569	0.212646	1.95098	1.1633	1.66298	2.69289	3.05782
hippocampus > temporal lobe > cerebral cortex lobe / region > cerebral cortex (neopallium) > cerebral hemisphere > telencephalon (cerebrum) > forebrain (prosencephalon) > brain (encephalon) > central nervous system (CNS) > nervous system > Tissue	hippocampus		10	1.8093	0.191434	1.88162	1.03931	1.1053	2.03891	2.86023
uterine endometrium > uterus > female reproductive system > reproductive system > Tissue	uterine endometrium		43	1.83516	0.163269	1.82427	0.080108	0.806882	2.69085	3.72461
lung > respiratory system > Tissue	lung		485	1.83727	0.0729176	1.55014	0	0.323968	3.03994	6.38995
hypothalamus > diencephalon > forebrain (prosencephalon) > brain (encephalon) > central nervous system (CNS) > nervous system > Tissue	hypothalamus		55	1.87051	0.190902	1.52145	0.102777	0.846657	2.49288	4.93192
caudate nucleus > dorsal striatum > striatum > corpus striatum > basal ganglia > cerebral hemisphere > telencephalon (cerebrum) > forebrain (prosencephalon) > brain (encephalon) > central nervous system (CNS) > nervous system > Tissue	caudate nucleus		85	1.75355	0.141806	1.31395	0.0682991	0.804929	2.52401	5.02624
cornu ammonis (hippocampus proper) > hippocampus > temporal lobe > cerebral cortex lobe / region > cerebral cortex (neopallium) > cerebral hemisphere > telencephalon (cerebrum) > forebrain (prosencephalon) > brain (encephalon) > central nervous system (CNS) > nervous system > Tissue	cornu ammonis (hippocampus proper)		63	1.63876	0.144432	1.25959	0	0.733735	2.38443	4.56481
accumbens nucleus > ventral striatum > striatum > corpus striatum > basal ganglia > cerebral hemisphere > telencephalon (cerebrum) > forebrain (prosencephalon) > brain (encephalon) > central nervous system (CNS) > nervous system > Tissue	accumbens nucleus		70	1.41539	0.125734	1.2025	0.143207	0.743993	1.76518	2.74727
hippocampus astrocyte > temporal lobe astrocyte > cerebral cortex astrocyte > telencephalon astrocyte > forebrain astrocyte > brain astrocyte (unspecified) > astrocyte (unspecified) > astrocyte > glia cell > central nervous system cell > nervous system cell > Cell type	hippocampus astrocyte		4	1.34913	0.487792	1.02669	0.616509	0.700239	2.72662	2.72662
alveolar type 2 cell organoid culture > Organotypic / 3D culture	alveolar type 2 cell organoid culture	Organoid cell culture derived from primary human alveolar type 2 (AT2) cells.	16	1.36941	0.397271	1.01968	0	0	2.54333	4.62924
uterine corpus endometrium > uterine corpus (body of uterus) > uterus > female reproductive system > reproductive system > Tissue	uterine corpus endometrium		23	1.79974	0.41941	1.01847	0	0.0429101	3.31291	5.63649
amygdala > temporal lobe > cerebral cortex lobe / region > cerebral cortex (neopallium) > cerebral hemisphere > telencephalon (cerebrum) > forebrain (prosencephalon) > brain (encephalon) > central nervous system (CNS) > nervous system > Tissue	amygdala		45	1.36616	0.160995	0.960576	0.116566	0.701617	1.49428	2.44476
cerebral cortex myelinating oligodendrocyte > telencephalon myelinating oligodendrocyte > forebrain myelinating oligodendrocyte > brain myelinating oligodendrocyte > myelinating oligodendrocyte > oligodendrocyte > glia cell > central nervous system cell > nervous system cell > Cell type	cerebral cortex myelinating oligodendrocyte		3	0.793156	0.427739	0.912141	0	0	1.46733	1.46733
uterus > female reproductive system > reproductive system > Tissue	uterus		12	1.34174	0.301921	0.79569	0.147697	0.596338	2.23277	3.28881
fusiform gyrus (lateral occipitotemporal gyrus) > temporal lobe > cerebral cortex lobe / region > cerebral cortex (neopallium) > cerebral hemisphere > telencephalon (cerebrum) > forebrain (prosencephalon) > brain (encephalon) > central nervous system (CNS) > nervous system > Tissue	fusiform gyrus (lateral occipitotemporal gyrus)		406	0.81893	0.0284365	0.721596	0	0.384922	1.12357	2.21442
bronchiolar basal cell > bronchiolar (small airway) epithelium cell > bronchiolar (small airway) mucosa cell > bronchiolar (small airway) cell > bronchoalveolar system cell > lung cell > respiratory system cell > Cell type	bronchiolar basal cell	----	3	0.915117	0.593398	0.718239	0	0	2.02711	2.02711
Brodmann area 9 > dorsolateral prefrontal cortex > prefrontal cortex > frontal lobe > cerebral cortex lobe / region > cerebral cortex (neopallium) > cerebral hemisphere > telencephalon (cerebrum) > forebrain (prosencephalon) > brain (encephalon) > central nervous system (CNS) > nervous system > Tissue	Brodmann area 9		169	0.843484	0.0520019	0.680151	0	0.437128	1.224	1.92497
myoblast derived myotube > skeletal muscle myotube > skeletal muscle cell > musculoskeletal system cell > Cell type	myoblast derived myotube		6	0.766824	0.240711	0.678067	0.17017	0.322188	0.994891	1.75756
anterior cingulate gyrus > cingulate cortex > cerebral cortex lobe / region > cerebral cortex (neopallium) > cerebral hemisphere > telencephalon (cerebrum) > forebrain (prosencephalon) > brain (encephalon) > central nervous system (CNS) > nervous system > Tissue	anterior cingulate gyrus		56	0.69696	0.0437718	0.674936	0.10366	0.453987	0.86901	1.48846
temporal lobe > cerebral cortex lobe / region > cerebral cortex (neopallium) > cerebral hemisphere > telencephalon (cerebrum) > forebrain (prosencephalon) > brain (encephalon) > central nervous system (CNS) > nervous system > Tissue	temporal lobe		8	0.742852	0.196353	0.658998	0	0.409044	1.28088	1.45449
brain (encephalon) > central nervous system (CNS) > nervous system > Tissue	brain (encephalon)		8	0.651716	0.130381	0.595947	0.0885981	0.508213	0.859225	1.34097
pulmonary CD4 regulatory T-cell (unspecified) > CD4 regulatory T-cell (unspecified) > CD4 regulatory T-cell > CD4 T-cell > T-cell > T-cell lineage > lymphocyte > lymphoid leukocyte > leukocyte > hematopoietic and immune system cell > Cell type	pulmonary CD4 regulatory T-cell (unspecified)		1	0.590604	NaN	0.590604	0.590604	0.590604	0.590604	0.590604
substantia nigra > midbrain (mesencephalon) > brain (encephalon) > central nervous system (CNS) > nervous system > Tissue	substantia nigra		39	0.665124	0.0483716	0.583605	0.0545932	0.429261	0.900783	1.40293
middle temporal gyrus (Brodmann area 21) > temporal lobe > cerebral cortex lobe / region > cerebral cortex (neopallium) > cerebral hemisphere > telencephalon (cerebrum) > forebrain (prosencephalon) > brain (encephalon) > central nervous system (CNS) > nervous system > Tissue	middle temporal gyrus (Brodmann area 21)		5	0.556792	0.133175	0.582352	0.548321	0.548321	0.749633	0.835733
cervical region of the spinal cord > spinal cord > central nervous system (CNS) > nervous system > Tissue	cervical region of the spinal cord		41	0.794965	0.147798	0.568708	0	0.321991	0.789442	1.32946
frontal lobe > cerebral cortex lobe / region > cerebral cortex (neopallium) > cerebral hemisphere > telencephalon (cerebrum) > forebrain (prosencephalon) > brain (encephalon) > central nervous system (CNS) > nervous system > Tissue	frontal lobe		64	0.539687	0.0375799	0.529547	0	0.331334	0.722501	1.24083
dorsolateral prefrontal cortex > prefrontal cortex > frontal lobe > cerebral cortex lobe / region > cerebral cortex (neopallium) > cerebral hemisphere > telencephalon (cerebrum) > forebrain (prosencephalon) > brain (encephalon) > central nervous system (CNS) > nervous system > Tissue	dorsolateral prefrontal cortex		67	0.606083	0.0411358	0.516977	0.0328579	0.355746	0.8659	1.56332
pulmonary CD4 effector memory T-cell > CD4 effector memory T-cell > CD4 memory T-cell > CD4 T-cell > T-cell > T-cell lineage > lymphocyte > lymphoid leukocyte > leukocyte > hematopoietic and immune system cell > Cell type	pulmonary CD4 effector memory T-cell		3	0.506952	0.290803	0.513549	0	0	1.00731	1.00731
putamen > dorsal striatum > striatum > corpus striatum > basal ganglia > cerebral hemisphere > telencephalon (cerebrum) > forebrain (prosencephalon) > brain (encephalon) > central nervous system (CNS) > nervous system > Tissue	putamen		64	0.640344	0.0544689	0.498565	0.0225708	0.354078	0.848887	1.55024
renal (kidney) cortex > kidney > urinary system > Tissue	renal (kidney) cortex		3	0.493417	0.254464	0.487163	0.0558323	0.0558323	0.937256	0.937256
cerebral cortex lobe / region > cerebral cortex (neopallium) > cerebral hemisphere > telencephalon (cerebrum) > forebrain (prosencephalon) > brain (encephalon) > central nervous system (CNS) > nervous system > Tissue	cerebral cortex lobe / region		23	0.500312	0.0698326	0.460934	0	0.284164	0.625131	0.972722
pulmonary CD4 resident memory T-cell > CD4 tissue-resident memory T-cell > CD4 memory T-cell > CD4 T-cell > T-cell > T-cell lineage > lymphocyte > lymphoid leukocyte > leukocyte > hematopoietic and immune system cell > Cell type	pulmonary CD4 resident memory T-cell		2	0.458817	0.248956	0.458817	0.209861	0.209861	0.707773	0.707773
immature NK T-cell > NK T-cell > T-cell > T-cell lineage > lymphocyte > lymphoid leukocyte > leukocyte > hematopoietic and immune system cell > Cell type	immature NK T-cell		1	0.454451	NaN	0.454451	0.454451	0.454451	0.454451	0.454451
synovial membrane macrophage > macrophage > myeloid leukocyte > leukocyte > hematopoietic and immune system cell > Cell type	synovial membrane macrophage		12	0.41539	0.0860142	0.449877	0	0.231804	0.67172	0.853976
Brodmann area 46 > dorsolateral prefrontal cortex > prefrontal cortex > frontal lobe > cerebral cortex lobe / region > cerebral cortex (neopallium) > cerebral hemisphere > telencephalon (cerebrum) > forebrain (prosencephalon) > brain (encephalon) > central nervous system (CNS) > nervous system > Tissue	Brodmann area 46		27	0.456789	0.0330542	0.446655	0.166046	0.323228	0.55395	0.849528
frontal cortex > frontal lobe > cerebral cortex lobe / region > cerebral cortex (neopallium) > cerebral hemisphere > telencephalon (cerebrum) > forebrain (prosencephalon) > brain (encephalon) > central nervous system (CNS) > nervous system > Tissue	frontal cortex		10	0.371261	0.0658879	0.433783	0.0292367	0.155373	0.465126	0.746843
parietal cortex > parietal lobe > cerebral cortex lobe / region > cerebral cortex (neopallium) > cerebral hemisphere > telencephalon (cerebrum) > forebrain (prosencephalon) > brain (encephalon) > central nervous system (CNS) > nervous system > Tissue	parietal cortex		10	0.394697	0.0908687	0.416677	0.0577994	0.0977177	0.636941	0.754313
internal capsule > cerebral white matter > cerebral hemisphere > telencephalon (cerebrum) > forebrain (prosencephalon) > brain (encephalon) > central nervous system (CNS) > nervous system > Tissue	internal capsule		10	0.748464	0.252055	0.401786	0.0813136	0.17458	1.21006	2.56767
pulmonary CD8 resident memory T-cell > tissue-resident CD8 memory T-cell > CD8 memory T-cell > CD8 T-cell > T-cell > T-cell lineage > lymphocyte > lymphoid leukocyte > leukocyte > hematopoietic and immune system cell > Cell type	pulmonary CD8 resident memory T-cell		2	0.389427	0.270956	0.389427	0.11847	0.11847	0.660383	0.660383
thyroid gland > endocrine system (except testis and ovary) > Tissue	thyroid gland		130	0.576288	0.05227	0.37911	0	0.194913	0.712215	1.4626
stomach fundus > gastric (stomach) region > stomach > gastrointestinal tract > alimentary system > Tissue	stomach fundus		6	0.337952	0.120821	0.376746	0	0.02921	0.447904	0.797109
Brodmann area 4 > primary motor cortex > motor cortex > frontal lobe > cerebral cortex lobe / region > cerebral cortex (neopallium) > cerebral hemisphere > telencephalon (cerebrum) > forebrain (prosencephalon) > brain (encephalon) > central nervous system (CNS) > nervous system > Tissue	Brodmann area 4		14	0.382282	0.0387179	0.356629	0.198699	0.254288	0.49265	0.692406
premotor cortex (Brodmann area 6) > motor cortex > frontal lobe > cerebral cortex lobe / region > cerebral cortex (neopallium) > cerebral hemisphere > telencephalon (cerebrum) > forebrain (prosencephalon) > brain (encephalon) > central nervous system (CNS) > nervous system > Tissue	premotor cortex (Brodmann area 6)		6	0.311799	0.10362	0.350068	0	0.0277852	0.518192	0.624679
nasal epithelium cell > nasal mucosa cell > nose cell > sensory organ system cell > Cell type	nasal epithelium cell		565	1.63232	0.0951054	0.328231	0	0	2.93703	7.22536
cerebral cortex (neopallium) > cerebral hemisphere > telencephalon (cerebrum) > forebrain (prosencephalon) > brain (encephalon) > central nervous system (CNS) > nervous system > Tissue	cerebral cortex (neopallium)		22	0.423094	0.0642563	0.327449	0.0885981	0.21911	0.518875	0.688973
prefrontal cortex > frontal lobe > cerebral cortex lobe / region > cerebral cortex (neopallium) > cerebral hemisphere > telencephalon (cerebrum) > forebrain (prosencephalon) > brain (encephalon) > central nervous system (CNS) > nervous system > Tissue	prefrontal cortex		65	0.496145	0.0653482	0.325574	0	0.135025	0.613348	1.1748
Brodmann area 40 > parietal lobe > cerebral cortex lobe / region > cerebral cortex (neopallium) > cerebral hemisphere > telencephalon (cerebrum) > forebrain (prosencephalon) > brain (encephalon) > central nervous system (CNS) > nervous system > Tissue	Brodmann area 40		5	0.267252	0.0829488	0.324769	0.0598484	0.102502	0.338999	0.510142
posterior superior temporal gyrus (Brodmann area 22) > superior temporal gyrus > temporal lobe > cerebral cortex lobe / region > cerebral cortex (neopallium) > cerebral hemisphere > telencephalon (cerebrum) > forebrain (prosencephalon) > brain (encephalon) > central nervous system (CNS) > nervous system > Tissue	posterior superior temporal gyrus (Brodmann area 22)		6	0.361848	0.0965401	0.313186	0.114577	0.235697	0.38895	0.38895
pars triangularis (Brodmann area 45) > inferior frontal gyrus > frontal lobe > cerebral cortex lobe / region > cerebral cortex (neopallium) > cerebral hemisphere > telencephalon (cerebrum) > forebrain (prosencephalon) > brain (encephalon) > central nervous system (CNS) > nervous system > Tissue	pars triangularis (Brodmann area 45)		6	0.281629	0.0593878	0.289038	0.0614384	0.204379	0.401914	0.443965
pars orbitalis (Brodmann area 47) > prefrontal cortex > frontal lobe > cerebral cortex lobe / region > cerebral cortex (neopallium) > cerebral hemisphere > telencephalon (cerebrum) > forebrain (prosencephalon) > brain (encephalon) > central nervous system (CNS) > nervous system > Tissue	pars orbitalis (Brodmann area 47)		5	0.346761	0.11455	0.274469	0.084437	0.244657	0.361887	0.361887
cerebral cortex astrocyte > telencephalon astrocyte > forebrain astrocyte > brain astrocyte (unspecified) > astrocyte (unspecified) > astrocyte > glia cell > central nervous system cell > nervous system cell > Cell type	cerebral cortex astrocyte		10	0.724404	0.283904	0.26318	0	0	1.61922	2.43192
uterine endocervix > uterine cervix > uterus > female reproductive system > reproductive system > Tissue	uterine endocervix		5	1.30014	0.760918	0.261623	0	0.16407	2.17623	3.89877
Brodmann area 24 > cingulate cortex > cerebral cortex lobe / region > cerebral cortex (neopallium) > cerebral hemisphere > telencephalon (cerebrum) > forebrain (prosencephalon) > brain (encephalon) > central nervous system (CNS) > nervous system > Tissue	Brodmann area 24		12	0.326788	0.0821395	0.257147	0	0.122592	0.590847	0.722768
dermal fibroblast > dermis cell > skin cell > integumentary system cell > Cell type	dermal fibroblast		1	0.239177	NaN	0.239177	0.239177	0.239177	0.239177	0.239177
pars opercularis (Brodmann area 44) > inferior frontal gyrus > frontal lobe > cerebral cortex lobe / region > cerebral cortex (neopallium) > cerebral hemisphere > telencephalon (cerebrum) > forebrain (prosencephalon) > brain (encephalon) > central nervous system (CNS) > nervous system > Tissue	pars opercularis (Brodmann area 44)		5	0.481558	0.179287	0.238693	0.150847	0.180963	0.886435	0.950853
cerebral cortex microglia cell > telencephalon microglia cell > forebrain microglia cell > brain microglia cell > microglia cell > glia cell > central nervous system cell > nervous system cell > Cell type	cerebral cortex microglia cell		2	0.235456	0.235456	0.235456	0	0	0.470912	0.470912
splenic flexure > colon > colorectum > large intestine > intestine > gastrointestinal tract > alimentary system > Tissue	splenic flexure		1	0.222217	NaN	0.222217	0.222217	0.222217	0.222217	0.222217
cerebellar hemisphere > cerebellar cortex > cerebellum > metencephalon > hindbrain (rhombencephalon) > brain (encephalon) > central nervous system (CNS) > nervous system > Tissue	cerebellar hemisphere		138	0.233565	0.0157473	0.20505	0	0.0827828	0.373478	0.687204
tumor derived microglia cell > microglia cell > glia cell > central nervous system cell > nervous system cell > Cell type	tumor derived microglia cell		7	0.614255	0.294712	0.189761	0	0	1.5339	1.87955
thymus > lymphoid tissue > hematopoietic and immune system > Tissue	thymus		2	0.18391	0.0112428	0.18391	0.172667	0.172667	0.195153	0.195153
middle lobe (cerebellum) > cerebellum > metencephalon > hindbrain (rhombencephalon) > brain (encephalon) > central nervous system (CNS) > nervous system > Tissue	middle lobe (cerebellum)		26	0.183203	0.0295739	0.166415	0	0.0767978	0.256635	0.512449
thyroid left lobe > thyroid gland > endocrine system (except testis and ovary) > Tissue	thyroid left lobe		103	0.332878	0.0446117	0.158817	0	0.0478821	0.458304	0.966601
large airway basal cell > large airway epithelium cell > large airway mucosa cell > large airway cell > bronchoalveolar system cell > lung cell > respiratory system cell > Cell type	large airway basal cell		41	0.230856	0.0388137	0.158355	0	0.0621491	0.329982	0.484181
pancreatic islet cell > endocrine pancreatic cell > endocrine system (except testis and ovary) cell > Cell type	pancreatic islet cell		18	0.175477	0.0311038	0.152608	0	0.113327	0.224699	0.324903
tendon synovium > tendon > musculoskeletal system > Tissue	tendon synovium		41	0.160377	0.0273732	0.144121	0	0	0.233268	0.499306
fetal heart atrium > fetal heart muscle (myocardium, cardiac muscle) > fetal heart > fetus > fetal tissue / fluid > gestational structure > Tissue	fetal heart atrium		2	0.136602	0.136602	0.136602	0	0	0.273205	0.273205
stomach body > gastric (stomach) region > stomach > gastrointestinal tract > alimentary system > Tissue	stomach body		122	0.207311	0.0233319	0.128871	0	0.0351147	0.280223	0.646864
uterine ectocervix > uterine cervix > uterus > female reproductive system > reproductive system > Tissue	uterine ectocervix		6	0.106649	0.0389557	0.118185	0	0	0.190423	0.213099
kidney > urinary system > Tissue	kidney		145	0.159659	0.0103382	0.116995	0	0.0728087	0.213891	0.393912
oral mucosa (unspecified) > mouth (oral cavity) > gastrointestinal tract > alimentary system > Tissue	oral mucosa (unspecified)		12	0.165866	0.0647029	0.116848	0	0.0622504	0.21382	0.233933
pyloric antrum > gastric (stomach) region > stomach > gastrointestinal tract > alimentary system > Tissue	pyloric antrum		9	0.0978733	0.0332613	0.114945	0	0	0.205131	0.223746
hepatic flexure > proximal colonic mucosa > proximal colon > colon > colorectum > large intestine > intestine > gastrointestinal tract > alimentary system > Tissue	hepatic flexure		1	0.111293	NaN	0.111293	0.111293	0.111293	0.111293	0.111293
knee chondrocyte > articular chondrocyte > articular cartilage cell > cartilage cell > skeletal system cell > musculoskeletal system cell > Cell type	knee chondrocyte		2	0.107597	0.107597	0.107597	0	0	0.215194	0.215194
placenta > extraembryonic tissue / fluid > gestational structure > Tissue	placenta		4	0.114128	0.0661216	0.107385	0	0	0.241743	0.241743
base of tongue > tongue > mouth (oral cavity) > gastrointestinal tract > alimentary system > Tissue	base of tongue		2	0.106875	0.0212863	0.106875	0.0855884	0.0855884	0.128161	0.128161
popliteal artery > artery > blood vessel > vascular system > cardiovascular system > circulatory system > Tissue	popliteal artery		2	0.104879	0.104879	0.104879	0	0	0.209758	0.209758
prostate (prostate gland) > male reproductive system > reproductive system > Tissue	prostate (prostate gland)		127	0.212703	0.0269404	0.101692	0	0.0242494	0.288761	0.621265
angular gyrus (Brodmann area 39) > parietal lobe > cerebral cortex lobe / region > cerebral cortex (neopallium) > cerebral hemisphere > telencephalon (cerebrum) > forebrain (prosencephalon) > brain (encephalon) > central nervous system (CNS) > nervous system > Tissue	angular gyrus (Brodmann area 39)		5	0.166893	0.0751552	0.0970784	0	0.0546015	0.283384	0.399399
large airway epithelium cell > large airway mucosa cell > large airway cell > bronchoalveolar system cell > lung cell > respiratory system cell > Cell type	large airway epithelium cell	----	27	3.02557	0.76544	0.0840673	0	0	7.93013	8.94466
seminal vesicle > male reproductive system > reproductive system > Tissue	seminal vesicle		2	0.0767033	0.00338614	0.0767033	0.0733172	0.0733172	0.0800895	0.0800895
pulmonary CD8 effector memory T-cell > CD8 effector memory T-cell > CD8 memory T-cell > CD8 T-cell > T-cell > T-cell lineage > lymphocyte > lymphoid leukocyte > leukocyte > hematopoietic and immune system cell > Cell type	pulmonary CD8 effector memory T-cell		3	0.663701	0.627734	0.0726336	0	0	1.91847	1.91847
larynx > respiratory system > Tissue	larynx		12	0.5659	0.368754	0.0673749	0	0.038001	0.779888	0.91985
stomach > gastrointestinal tract > alimentary system > Tissue	stomach		3	0.0602847	0.0348087	0.0602734	0	0	0.120581	0.120581
pancreatic islet (islet of Langerhans) > pancreas > alimentary system > Tissue	pancreatic islet (islet of Langerhans)		132	0.110222	0.0129595	0.0521039	0	0	0.168395	0.399391
uterine endometrium stroma cell > uterine endometrium cell > uterus cell > female reproductive system cell > reproductive system cell > Cell type	uterine endometrium stroma cell		14	0.0619794	0.0202287	0.0507197	0	0	0.0833433	0.168269
sigmoid colonic muscle > sigmoid colon > distal colonic mucosa > distal colon > colon > colorectum > large intestine > intestine > gastrointestinal tract > alimentary system > Tissue	sigmoid colonic muscle		108	0.106919	0.0146869	0.0488664	0	0	0.174668	0.432572
smooth muscle (unspecified) > musculoskeletal system > Tissue	smooth muscle (unspecified)		3	0.043092	0.0238611	0.0468795	0	0	0.0823965	0.0823965
uterine cervix > uterus > female reproductive system > reproductive system > Tissue	uterine cervix		3	0.0554283	0.0186063	0.040732	0.0331691	0.0331691	0.0923839	0.0923839
mouth floor > mouth (oral cavity) > gastrointestinal tract > alimentary system > Tissue	mouth floor		3	0.027039	0.0135195	0.040508	0	0	0.0406091	0.0406091
ovary (female gonad) > female reproductive system > reproductive system > Tissue	ovary (female gonad)		71	0.215998	0.0690739	0.039687	0	0	0.152992	0.371997
lower esophagus > esophagus (oesophagus) > gastrointestinal tract > alimentary system > Tissue	lower esophagus		2	0.0347846	0.0347846	0.0347846	0	0	0.0695692	0.0695692
uterine corpus (body of uterus) > uterus > female reproductive system > reproductive system > Tissue	uterine corpus (body of uterus)		30	0.104983	0.0469714	0.0347193	0	0	0.109345	0.172355
lower esophageal mucosa > lower esophagus > esophagus (oesophagus) > gastrointestinal tract > alimentary system > Tissue	lower esophageal mucosa		1	0.0324117	NaN	0.0324117	0.0324117	0.0324117	0.0324117	0.0324117
left coronary artery > coronary artery > artery > blood vessel > vascular system > cardiovascular system > circulatory system > Tissue	left coronary artery		22	0.0394034	0.0105862	0.0301861	0	0	0.0485622	0.111951
stomach cardia > gastric (stomach) region > stomach > gastrointestinal tract > alimentary system > Tissue	stomach cardia		11	0.0239154	0.00913247	0.0294111	0	0	0.0330289	0.0397789
urinary bladder > urinary system > Tissue	urinary bladder		27	0.0452255	0.0114687	0.0273064	0	0	0.098192	0.231493
fetal heart ventricle > fetal heart muscle (myocardium, cardiac muscle) > fetal heart > fetus > fetal tissue / fluid > gestational structure > Tissue	fetal heart ventricle		2	0.0269199	0.0269199	0.0269199	0	0	0.0538397	0.0538397
pancreatic tail > pancreatic region > pancreas > alimentary system > Tissue	pancreatic tail		1	0.0257891	NaN	0.0257891	0.0257891	0.0257891	0.0257891	0.0257891
lower esophageal muscle > lower esophagus > esophagus (oesophagus) > gastrointestinal tract > alimentary system > Tissue	lower esophageal muscle		195	0.0640109	0.00725933	0.0249834	0	0	0.0970876	0.233222
tongue > mouth (oral cavity) > gastrointestinal tract > alimentary system > Tissue	tongue		12	0.444149	0.395089	0.0242747	0	0.0132988	0.0728787	0.0728787
small intestine > intestine > gastrointestinal tract > alimentary system > Tissue	small intestine		23	0.0849553	0.0283945	0.0229485	0	0	0.14396	0.306518
fetal skin fibroblast > fetal skin cell > fetal cell > gestational structure cell > Cell type	fetal skin fibroblast		6	0.0820811	0.0548005	0.0219522	0	0	0.104523	0.104523
uterine myometrium > uterus > female reproductive system > reproductive system > Tissue	uterine myometrium		22	0.11516	0.0600826	0.0216922	0	0	0.109403	0.171487
anterior transverse temporal area (Brodmann area 41) > primary auditory cortex > auditory cortex > temporal lobe > cerebral cortex lobe / region > cerebral cortex (neopallium) > cerebral hemisphere > telencephalon (cerebrum) > forebrain (prosencephalon) > brain (encephalon) > central nervous system (CNS) > nervous system > Tissue	anterior transverse temporal area (Brodmann area 41)		3	0.0628612	0.0527041	0.0210147	0	0	0.167569	0.167569
right coronary artery > coronary artery > artery > blood vessel > vascular system > cardiovascular system > circulatory system > Tissue	right coronary artery		2	0.019674	0.019674	0.019674	0	0	0.039348	0.039348
cervical spinal ganglion (dorsal root ganglion) > spinal ganglion (dorsal root ganglion) > peripheral nervous system (PNS) > nervous system > Tissue	cervical spinal ganglion (dorsal root ganglion)		3	0.0252393	0.0169506	0.0182579	0	0	0.05746	0.05746
tracheal basal cell > tracheal epithelium cell > tracheal mucosa cell > trachea cell > respiratory system cell > Cell type	tracheal basal cell		6	0.0183786	0.00828798	0.0169785	0	0	0.0348169	0.0414977
pancreatic head > pancreatic region > pancreas > alimentary system > Tissue	pancreatic head		1	0.0169657	NaN	0.0169657	0.0169657	0.0169657	0.0169657	0.0169657
breast (mammary gland) > trunk > other body part > Tissue	breast (mammary gland)		204	0.0516852	0.00633756	0.0147907	0	0	0.0774046	0.171539
cardiomyocyte (heart muscle cell) > heart cell > cardiovascular system cell > circulatory system cell > Cell type	cardiomyocyte (heart muscle cell)		6	0.011532	0.00521763	0.00990131	0	0	0.0235056	0.0258839
adrenal gland cortex (adrenal cortex) > adrenal gland > endocrine system (except testis and ovary) > Tissue	adrenal gland cortex (adrenal cortex)		24	0.0482107	0.0144557	0.00942787	0	0	0.0814951	0.103257
chorion villus > chorion (chorionic membrane) > chorioamniotic membrane > extraembryonic tissue / fluid > gestational structure > Tissue	chorion villus		77	0.00932643	0.00336392	0	0	0	0	0
mouth (oral cavity) > gastrointestinal tract > alimentary system > Tissue	mouth (oral cavity)		1	0	NaN	0	0	0	0	0
salivary gland > mouth (oral cavity) > gastrointestinal tract > alimentary system > Tissue	salivary gland		3	0.0109375	0.0109375	0	0	0	0.0328125	0.0328125
minor salivary gland > salivary gland > mouth (oral cavity) > gastrointestinal tract > alimentary system > Tissue	minor salivary gland		47	0.0248861	0.00596393	0	0	0	0.0563809	0.140451
gastric (stomach) mucosa > stomach > gastrointestinal tract > alimentary system > Tissue	gastric (stomach) mucosa		1	0	NaN	0	0	0	0	0
intestine > gastrointestinal tract > alimentary system > Tissue	intestine		2	0	0	0	0	0	0	0
intestinal mucosa > intestine > gastrointestinal tract > alimentary system > Tissue	intestinal mucosa		19	0.0134045	0.00598934	0	0	0	0.0123444	0.0281909
large intestine > intestine > gastrointestinal tract > alimentary system > Tissue	large intestine		2	0	0	0	0	0	0	0
caecum (cecum) > large intestine > intestine > gastrointestinal tract > alimentary system > Tissue	caecum (cecum)		4	0	0	0	0	0	0	0
apex of caecum (appendix) > caecum (cecum) > large intestine > intestine > gastrointestinal tract > alimentary system > Tissue	apex of caecum (appendix)		3	0.0700244	0.0700244	0	0	0	0.210073	0.210073
colorectum > large intestine > intestine > gastrointestinal tract > alimentary system > Tissue	colorectum		18	0.0247047	0.0139022	0	0	0	0.0301448	0.0733581
colon > colorectum > large intestine > intestine > gastrointestinal tract > alimentary system > Tissue	colon		105	0.013583	0.0039181	0	0	0	0	0
colonic mucosa > colon > colorectum > large intestine > intestine > gastrointestinal tract > alimentary system > Tissue	colonic mucosa		198	0.0133321	0.00493482	0	0	0	0	0
ascending colon > proximal colonic mucosa > proximal colon > colon > colorectum > large intestine > intestine > gastrointestinal tract > alimentary system > Tissue	ascending colon		44	0.0164751	0.00568925	0	0	0	0	0
transverse colon > proximal colonic mucosa > proximal colon > colon > colorectum > large intestine > intestine > gastrointestinal tract > alimentary system > Tissue	transverse colon		134	0.0454168	0.00859792	0	0	0	0.0590038	0.137893
transverse colonic mucosa > transverse colon > proximal colonic mucosa > proximal colon > colon > colorectum > large intestine > intestine > gastrointestinal tract > alimentary system > Tissue	transverse colonic mucosa		1	0	NaN	0	0	0	0	0
descending colon > distal colonic mucosa > distal colon > colon > colorectum > large intestine > intestine > gastrointestinal tract > alimentary system > Tissue	descending colon		38	0.0279687	0.00669982	0	0	0	0.0352315	0.0859857
sigmoid colon > distal colonic mucosa > distal colon > colon > colorectum > large intestine > intestine > gastrointestinal tract > alimentary system > Tissue	sigmoid colon		42	0.0211973	0.00607453	0	0	0	0.0239523	0.0540231
rectosigmoid colon > colon > colorectum > large intestine > intestine > gastrointestinal tract > alimentary system > Tissue	rectosigmoid colon		5	0.00759134	0.00517543	0	0	0	0.011785	0.0261717
rectosigmoid junction > colon > colorectum > large intestine > intestine > gastrointestinal tract > alimentary system > Tissue	rectosigmoid junction		6	0	0	0	0	0	0	0
rectum > colorectum > large intestine > intestine > gastrointestinal tract > alimentary system > Tissue	rectum		202	0.0105474	0.00269051	0	0	0	0	0
duodenum > small intestine > intestine > gastrointestinal tract > alimentary system > Tissue	duodenum		37	0.0496815	0.0241358	0	0	0	0	0
ileum > small intestine > intestine > gastrointestinal tract > alimentary system > Tissue	ileum		610	0.0469105	0.00387567	0	0	0	0.0515125	0.126755
ileal mucosa > ileum > small intestine > intestine > gastrointestinal tract > alimentary system > Tissue	ileal mucosa		17	0	0	0	0	0	0	0
esophagus (oesophagus) > gastrointestinal tract > alimentary system > Tissue	esophagus (oesophagus)		27	0.075551	0.0456043	0	0	0	0.0459591	0.0979006
esophageal (oesophageal) mucosa > esophagus (oesophagus) > gastrointestinal tract > alimentary system > Tissue	esophageal (oesophageal) mucosa		212	0.0417664	0.00545397	0	0	0	0.0447968	0.111481
esophagogastric junction muscle > lower esophagus > esophagus (oesophagus) > gastrointestinal tract > alimentary system > Tissue	esophagogastric junction muscle		119	0.0818479	0.0134235	0	0	0	0.10979	0.259016
liver > liver and biliary system > alimentary system > Tissue	liver		674	0.0491185	0.00637997	0	0	0	0	0
liver right lobe > liver lobe > liver > liver and biliary system > alimentary system > Tissue	liver right lobe		24	0.0128868	0.00472684	0	0	0	0.0259371	0.0615264
gall bladder > liver and biliary system > alimentary system > Tissue	gall bladder		3	0	0	0	0	0	0	0
intrahepatic bile duct > bile duct > liver and biliary system > alimentary system > Tissue	intrahepatic bile duct		8	0	0	0	0	0	0	0
extrahepatic bile duct > bile duct > liver and biliary system > alimentary system > Tissue	extrahepatic bile duct		1	0	NaN	0	0	0	0	0
pancreas > alimentary system > Tissue	pancreas		2	0	0	0	0	0	0	0
pancreatic body > pancreatic region > pancreas > alimentary system > Tissue	pancreatic body		84	0.0216581	0.0044997	0	0	0	0.0227974	0.0557183
heart > cardiovascular system > circulatory system > Tissue	heart		13	0	0	0	0	0	0	0
heart muscle (myocardium, cardiac muscle) > heart > cardiovascular system > circulatory system > Tissue	heart muscle (myocardium, cardiac muscle)		4	0	0	0	0	0	0	0
heart left ventricle > heart ventricle > heart muscle (myocardium, cardiac muscle) > heart > cardiovascular system > circulatory system > Tissue	heart left ventricle		389	0.0115986	0.00143829	0	0	0	0.0104446	0.0255695
left ventricle free wall > heart left ventricle > heart ventricle > heart muscle (myocardium, cardiac muscle) > heart > cardiovascular system > circulatory system > Tissue	left ventricle free wall		387	0.0201656	0.00254891	0	0	0	0	0
left ventricle apex > heart left ventricle > heart ventricle > heart muscle (myocardium, cardiac muscle) > heart > cardiovascular system > circulatory system > Tissue	left ventricle apex		41	0	0	0	0	0	0	0
heart right ventricle > heart ventricle > heart muscle (myocardium, cardiac muscle) > heart > cardiovascular system > circulatory system > Tissue	heart right ventricle		25	0.00199927	0.00199926	0	0	0	0	0
right ventricle free wall > heart right ventricle > heart ventricle > heart muscle (myocardium, cardiac muscle) > heart > cardiovascular system > circulatory system > Tissue	right ventricle free wall		15	0	0	0	0	0	0	0
aortic valve cusp (leaflet) > aortic valve > semilunar valve > heart valve > endocardium > heart > cardiovascular system > circulatory system > Tissue	aortic valve cusp (leaflet)		59	0.0123734	0.00386555	0	0	0	0	0
thoracic aorta > aorta > artery > blood vessel > vascular system > cardiovascular system > circulatory system > Tissue	thoracic aorta		13	0.0212993	0.0118641	0	0	0	0	0
ascending thoracic aorta > aorta > artery > blood vessel > vascular system > cardiovascular system > circulatory system > Tissue	ascending thoracic aorta		115	0.0222381	0.00462798	0	0	0	0	0
descending thoracic aorta > aorta > artery > blood vessel > vascular system > cardiovascular system > circulatory system > Tissue	descending thoracic aorta		5	0.0271784	0.016644	0	0	0	0.0674539	0.068438
tibial artery > infra-popliteal artery > artery > blood vessel > vascular system > cardiovascular system > circulatory system > Tissue	tibial artery		179	0.0199392	0.0041129	0	0	0	0	0
colonic microvessel endothelium > colonic microvessel > microvessel > blood vessel > vascular system > cardiovascular system > circulatory system > Tissue	colonic microvessel endothelium		7	0.826899	0.45208	0	0	0	2.26541	2.76958
blood > circulatory system > Tissue	blood		5710	0.00186244	0.000593796	0	0	0	0	0
skin > integumentary system > Tissue	skin		904	0.0421218	0.00503615	0	0	0	0	0
adrenal gland > endocrine system (except testis and ovary) > Tissue	adrenal gland		50	0.0150011	0.00654978	0	0	0	0	0
thyroid right lobe > thyroid gland > endocrine system (except testis and ovary) > Tissue	thyroid right lobe		19	0.110194	0.0398879	0	0	0	0.146537	0.293744
lymph node > lymphoid tissue > hematopoietic and immune system > Tissue	lymph node		7	0.0385617	0.0251711	0	0	0	0.117821	0.152111
spleen > lymphoid tissue > hematopoietic and immune system > Tissue	spleen		87	0.0286357	0.00505133	0	0	0	0.0420208	0.0948725
tonsil > lymphoid tissue > hematopoietic and immune system > Tissue	tonsil		3	0	0	0	0	0	0	0
Peyer’s patch > lymphoid tissue > hematopoietic and immune system > Tissue	Peyer’s patch		79	0.0783619	0.016197	0	0	0	0.0950625	0.210207
bone marrow > hematopoietic and immune system > Tissue	bone marrow		4	0	0	0	0	0	0	0
skeletal muscle > musculoskeletal system > Tissue	skeletal muscle		62	0.0359208	0.0139925	0	0	0	0	0
vastus lateralis muscle > quadriceps femoris muscle > thigh muscle > muscle of lower limb > skeletal muscle > musculoskeletal system > Tissue	vastus lateralis muscle		374	0.00247634	0.000819345	0	0	0	0	0
gastrocnemius muscle > leg muscle > muscle of lower limb > skeletal muscle > musculoskeletal system > Tissue	gastrocnemius muscle		228	0.0198245	0.00687575	0	0	0	0	0
iliac crest > ilium > os coxae (hipbone) > pelvis bone > bone > skeletal system (except bone marrow) > musculoskeletal system > Tissue	iliac crest		58	0.000677093	0.000478908	0	0	0	0	0
articular cartilage > cartilage > skeletal system (except bone marrow) > musculoskeletal system > Tissue	articular cartilage		123	0.0504011	0.00940552	0	0	0	0.0644194	0.142024
synovium (synovial membrane) > musculoskeletal system > Tissue	synovium (synovial membrane)		61	0.0621471	0.0184388	0	0	0	0.0833689	0.197558
Brodmann area 11 > orbitofrontal cortex > prefrontal cortex > frontal lobe > cerebral cortex lobe / region > cerebral cortex (neopallium) > cerebral hemisphere > telencephalon (cerebrum) > forebrain (prosencephalon) > brain (encephalon) > central nervous system (CNS) > nervous system > Tissue	Brodmann area 11		6	0.144684	0.115786	0	0	0	0.159283	0.159283
lumbar spinal ganglion (dorsal root ganglion) > spinal ganglion (dorsal root ganglion) > peripheral nervous system (PNS) > nervous system > Tissue	lumbar spinal ganglion (dorsal root ganglion)		3	0	0	0	0	0	0	0
tibial nerve > leg nerve > peripheral nerve > peripheral nervous system (PNS) > nervous system > Tissue	tibial nerve		168	0.077276	0.0111629	0	0	0	0.11153	0.254403
vagina > female reproductive system > reproductive system > Tissue	vagina		63	0.0481811	0.0104215	0	0	0	0.0753744	0.182597
auricle > external (outer) ear > ear > sensory organ system > Tissue	auricle		70	0.0248079	0.00559104	0	0	0	0.0247579	0.0611732
adipose tissue (fat) > connective tissue > Tissue	adipose tissue (fat)		7	0.0171362	0.00813114	0	0	0	0.0404697	0.0439713
subcutaneous adipose tissue (SAT) > adipose tissue (fat) > connective tissue > Tissue	subcutaneous adipose tissue (SAT)		23	0	0	0	0	0	0	0
gluteal subcutaneous adipose tissue (glutSAT) > subcutaneous adipose tissue (SAT) > adipose tissue (fat) > connective tissue > Tissue	gluteal subcutaneous adipose tissue (glutSAT)		39	0.00308228	0.0019396	0	0	0	0	0
interscapular subcutaneous adipose tissue > subcutaneous adipose tissue (SAT) > adipose tissue (fat) > connective tissue > Tissue	interscapular subcutaneous adipose tissue		6	0.353204	0.308649	0	0	0	0.234725	0.234725
subcutaneous abdominal adipose tissue (SAAT) > abdominal adipose tissue > adipose tissue (fat) > connective tissue > Tissue	subcutaneous abdominal adipose tissue (SAAT)		425	0.0110435	0.00238029	0	0	0	0	0
omental adipose tissue > intraperitoneal adipose tissue > intraabdominal adipose tissue (abdominal visceral adipose tissue) > abdominal adipose tissue > adipose tissue (fat) > connective tissue > Tissue	omental adipose tissue		176	0.0662098	0.00902006	0	0	0	0.0865409	0.210115
colostrum > milk > lactating breast (mammary gland) > breast (mammary gland) > trunk > other body part > Tissue	colostrum		3	0	0	0	0	0	0	0
transitional milk > milk > lactating breast (mammary gland) > breast (mammary gland) > trunk > other body part > Tissue	transitional milk		5	0	0	0	0	0	0	0
mature milk > milk > lactating breast (mammary gland) > breast (mammary gland) > trunk > other body part > Tissue	mature milk		8	0	0	0	0	0	0	0
umbilical vein endothelium cell > umbilical vein cell > umbilical cord cell > extraembryonic cell > gestational structure cell > Cell type	umbilical vein endothelium cell		30	0.0325469	0.014268	0	0	0	0	0
umbilical cord blood derived CD34 hematopoietic stem / progenitor cell > umbilical cord blood derived hematopoietic stem / progenitor cell > umbilical cord blood cell > umbilical cord cell > extraembryonic cell > gestational structure cell > Cell type	umbilical cord blood derived CD34 hematopoietic stem / progenitor cell		6	0.00164494	0.00164494	0	0	0	0	0
umbilical cord blood derived proerythroblast (pronormoblast) > umbilical cord blood derived hematopoietic stem / progenitor cell > umbilical cord blood cell > umbilical cord cell > extraembryonic cell > gestational structure cell > Cell type	umbilical cord blood derived proerythroblast (pronormoblast)		3	0	0	0	0	0	0	0
umbilical cord blood derived early basophilic erythroblast (normoblast) > umbilical cord blood derived basophilic erythroblast (normoblast) > umbilical cord blood derived hematopoietic stem / progenitor cell > umbilical cord blood cell > umbilical cord cell > extraembryonic cell > gestational structure cell > Cell type	umbilical cord blood derived early basophilic erythroblast (normoblast)		3	0	0	0	0	0	0	0
umbilical cord blood derived late basophilic erythroblast (normoblast) > umbilical cord blood derived basophilic erythroblast (normoblast) > umbilical cord blood derived hematopoietic stem / progenitor cell > umbilical cord blood cell > umbilical cord cell > extraembryonic cell > gestational structure cell > Cell type	umbilical cord blood derived late basophilic erythroblast (normoblast)		3	0	0	0	0	0	0	0
umbilical cord blood derived polychromatophilic erythroblast (normoblast) > umbilical cord blood derived hematopoietic stem / progenitor cell > umbilical cord blood cell > umbilical cord cell > extraembryonic cell > gestational structure cell > Cell type	umbilical cord blood derived polychromatophilic erythroblast (normoblast)		3	0	0	0	0	0	0	0
umbilical cord blood derived orthochromatophilic erythroblast (normoblast) > umbilical cord blood derived hematopoietic stem / progenitor cell > umbilical cord blood cell > umbilical cord cell > extraembryonic cell > gestational structure cell > Cell type	umbilical cord blood derived orthochromatophilic erythroblast (normoblast)		3	0	0	0	0	0	0	0
umbilical cord blood CD4 naive T-cell > umbilical cord blood CD4 T-cell > umbilical cord blood T-cell > umbilical cord blood T-cell lineage > umbilical cord blood derived lymphocyte > umbilical cord blood cell > umbilical cord cell > extraembryonic cell > gestational structure cell > Cell type	umbilical cord blood CD4 naive T-cell		3	0	0	0	0	0	0	0
umbilical cord blood CD4 activated T-cell > umbilical cord blood CD4 T-cell > umbilical cord blood T-cell > umbilical cord blood T-cell lineage > umbilical cord blood derived lymphocyte > umbilical cord blood cell > umbilical cord cell > extraembryonic cell > gestational structure cell > Cell type	umbilical cord blood CD4 activated T-cell		3	0	0	0	0	0	0	0
umbilical cord blood Th1 T-cell > umbilical cord blood CD4 helper T-cell (unspecified) > umbilical cord blood CD4 T-cell > umbilical cord blood T-cell > umbilical cord blood T-cell lineage > umbilical cord blood derived lymphocyte > umbilical cord blood cell > umbilical cord cell > extraembryonic cell > gestational structure cell > Cell type	umbilical cord blood Th1 T-cell		3	0	0	0	0	0	0	0
umbilical cord blood Th2 T-cell > umbilical cord blood CD4 helper T-cell (unspecified) > umbilical cord blood CD4 T-cell > umbilical cord blood T-cell > umbilical cord blood T-cell lineage > umbilical cord blood derived lymphocyte > umbilical cord blood cell > umbilical cord cell > extraembryonic cell > gestational structure cell > Cell type	umbilical cord blood Th2 T-cell		3	0	0	0	0	0	0	0
umbilical cord blood derived monocyte > umbilical cord blood derived myeloid leukocyte > umbilical cord blood cell > umbilical cord cell > extraembryonic cell > gestational structure cell > Cell type	umbilical cord blood derived monocyte		18	0.00194201	0.00194201	0	0	0	0	0
fetal hepatic myofibroblast > fetal hepatic mucosa cell > fetal liver cell > fetal cell > gestational structure cell > Cell type	fetal hepatic myofibroblast		8	0.0108759	0.00601827	0	0	0	0.0258523	0.0453469
oral keratinocyte > oral epithelium cell (unspecified) > oral mucosa cell (unspecified) > mouth (oral cavity) cell > gastrointestinal tract cell > alimentary system cell > Cell type	oral keratinocyte		15	0	0	0	0	0	0	0
colonic mucosa fibroblast > colonic mucosa cell > colorectal mucosa cell > large intestinal mucosa cell > large intestine cell > intestine cell > gastrointestinal tract cell > alimentary system cell > Cell type	colonic mucosa fibroblast		6	0	0	0	0	0	0	0
ileal mucosa fibroblast > ileal mucosa cell > small intestinal mucosa cell > small intestine cell > intestine cell > gastrointestinal tract cell > alimentary system cell > Cell type	ileal mucosa fibroblast		15	0	0	0	0	0	0	0
hepatic myofibroblast > hepatic mucosa cell > liver cell > liver and biliary system cell > alimentary system cell > Cell type	hepatic myofibroblast		18	0.0232256	0.00886378	0	0	0	0.036987	0.0749914
hepatocyte > hepatic epithelium cell > hepatic mucosa cell > liver cell > liver and biliary system cell > alimentary system cell > Cell type	hepatocyte		17	0	0	0	0	0	0	0
hepatic stellate cell > liver cell > liver and biliary system cell > alimentary system cell > Cell type	hepatic stellate cell		105	0.0160186	0.00426248	0	0	0	0	0
heart right atrial appendage fibroblast > heart right atrium cell > heart atrium cell > cardiac fibroblast > heart cell > cardiovascular system cell > circulatory system cell > Cell type	heart right atrial appendage fibroblast		192	0.0218426	0.00283288	0	0	0	0.0356011	0.0836454
heart ventricular myocyte > heart ventricle cell > cardiac fibroblast > heart cell > cardiovascular system cell > circulatory system cell > Cell type	heart ventricular myocyte		66	0.0131427	0.00523762	0	0	0	0	0
brain endothelium cell > blood vessel endothelium cell > vascular endothelium cell > blood vessel cell > vascular system cell > cardiovascular system cell > circulatory system cell > Cell type	brain endothelium cell		2	0	0	0	0	0	0	0
tumor derived endothelium cell > blood vessel endothelium cell > vascular endothelium cell > blood vessel cell > vascular system cell > cardiovascular system cell > circulatory system cell > Cell type	tumor derived endothelium cell		15	0.0248476	0.0248476	0	0	0	0	0
skin microvessel endothelium cell > microvessel endothelium cell > vascular endothelium cell > blood vessel cell > vascular system cell > cardiovascular system cell > circulatory system cell > Cell type	skin microvessel endothelium cell		1	0	NaN	0	0	0	0	0
lung microvessel endothelium cell > microvessel endothelium cell > vascular endothelium cell > blood vessel cell > vascular system cell > cardiovascular system cell > circulatory system cell > Cell type	lung microvessel endothelium cell		11	0.0255707	0.0178196	0	0	0	0.0324159	0.0380223
kidney microvessel endothelium cell > microvessel endothelium cell > vascular endothelium cell > blood vessel cell > vascular system cell > cardiovascular system cell > circulatory system cell > Cell type	kidney microvessel endothelium cell		16	0.0577396	0.0290842	0	0	0	0.141401	0.190988
prostate microvessel endothelium cell > microvessel endothelium cell > vascular endothelium cell > blood vessel cell > vascular system cell > cardiovascular system cell > circulatory system cell > Cell type	prostate microvessel endothelium cell		1	0	NaN	0	0	0	0	0
coronary artery smooth muscle cell > artery smooth muscle cell > vascular smooth muscle cell > blood vessel cell > vascular system cell > cardiovascular system cell > circulatory system cell > Cell type	coronary artery smooth muscle cell		6	0	0	0	0	0	0	0
skin fibroblast > skin cell > integumentary system cell > Cell type	skin fibroblast		52	0	0	0	0	0	0	0
foreskin fibroblast cell > skin fibroblast > skin cell > integumentary system cell > Cell type	foreskin fibroblast cell		12	0.00542355	0.00542355	0	0	0	0	0
epidermal keratinocyte > epidermis cell > skin cell > integumentary system cell > Cell type	epidermal keratinocyte		91	0.00765693	0.00253779	0	0	0	0	0
peripheral blood mononuclear cell > peripheral blood cell (not further specified) > hematopoietic and immune system cell > Cell type	peripheral blood mononuclear cell		1121	0.000521736	0.000351852	0	0	0	0	0
blood hematopoietic stem / progenitor cell > hematopoietic stem / progenitor cell > hematopoietic and immune system cell > Cell type	blood hematopoietic stem / progenitor cell		4	0	0	0	0	0	0	0
leukocyte > hematopoietic and immune system cell > Cell type	leukocyte		2	0	0	0	0	0	0	0
peripheral blood leukocyte > leukocyte > hematopoietic and immune system cell > Cell type	peripheral blood leukocyte		439	0.000684799	0.0006848	0	0	0	0	0
B-cell > B-cell lineage > lymphocyte > lymphoid leukocyte > leukocyte > hematopoietic and immune system cell > Cell type	B-cell		22	0	0	0	0	0	0	0
peripheral blood T3 B-cell > T3 B-cell > transitional stage B-cell > B-cell > B-cell lineage > lymphocyte > lymphoid leukocyte > leukocyte > hematopoietic and immune system cell > Cell type	peripheral blood T3 B-cell		17	0.0486641	0.0451619	0	0	0	0	0
peripheral blood naive B-cell > naive B-cell > mature B-cell > B-cell > B-cell lineage > lymphocyte > lymphoid leukocyte > leukocyte > hematopoietic and immune system cell > Cell type	peripheral blood naive B-cell	Synonym: peripheral blood mature naive B-cell. A naive B-cell is a mature B-cell that is typically described as surface IgD-positive, surface IgM-positive, CD20-positive, CD27-negative and that has not yet been activated by antigen in the periphery.	49	0.0644422	0.0434003	0	0	0	0	0
peripheral blood memory B-cell (unspecified) > memory B-cell > mature B-cell > B-cell > B-cell lineage > lymphocyte > lymphoid leukocyte > leukocyte > hematopoietic and immune system cell > Cell type	peripheral blood memory B-cell (unspecified)	A peripheral blood memory B-cell is a mature B-cell that is long-lived, readily activated upon re-encounter of its antigenic determinant, and has been selected for expression of higher affinity immunoglobulin. This cell type is typically described as CD19-positive, CD20-positive, MHC Class II-positive, and CD138-negative. Along with plasma cells, memory B/cells are sometimes referred to as ‘post-…	28	0.00931746	0.00931746	0	0	0	0	0
peripheral blood class switched memory B cell > class switched memory B cell > memory B-cell > mature B-cell > B-cell > B-cell lineage > lymphocyte > lymphoid leukocyte > leukocyte > hematopoietic and immune system cell > Cell type	peripheral blood class switched memory B cell		21	0.00223934	0.00223934	0	0	0	0	0
peripheral blood unswitched memory B-cell > unswitched memory B-cell > memory B-cell > mature B-cell > B-cell > B-cell lineage > lymphocyte > lymphoid leukocyte > leukocyte > hematopoietic and immune system cell > Cell type	peripheral blood unswitched memory B-cell		4	0	0	0	0	0	0	0
regulatory B-cell > mature B-cell > B-cell > B-cell lineage > lymphocyte > lymphoid leukocyte > leukocyte > hematopoietic and immune system cell > Cell type	regulatory B-cell	Synonym: Breg, B10 cell. A mature B-cell that is typically described as CD1d-positive and expressing interleukin-10. This cell type has been associated with suppression of chronic inflammatory responses and T cell responses.	3	0	0	0	0	0	0	0
effector B-cell (Be) > mature B-cell > B-cell > B-cell lineage > lymphocyte > lymphoid leukocyte > leukocyte > hematopoietic and immune system cell > Cell type	effector B-cell (Be)	Synonym: effector B-lymphocyte. A mature B-cell that produces cytokines that can influence CD4 T cell differentiation.	3	0	0	0	0	0	0	0
peripheral blood B-cell (unspecified) > B-cell (unspecified) > B-cell > B-cell lineage > lymphocyte > lymphoid leukocyte > leukocyte > hematopoietic and immune system cell > Cell type	peripheral blood B-cell (unspecified)		132	0.000255141	0.000255141	0	0	0	0	0
peripheral blood exhausted B-cell (unspecified) > peripheral blood B-cell (unspecified) > B-cell (unspecified) > B-cell > B-cell lineage > lymphocyte > lymphoid leukocyte > leukocyte > hematopoietic and immune system cell > Cell type	peripheral blood exhausted B-cell (unspecified)		4	0	0	0	0	0	0	0
synovial membrane B-cell (unspecified) > B-cell (unspecified) > B-cell > B-cell lineage > lymphocyte > lymphoid leukocyte > leukocyte > hematopoietic and immune system cell > Cell type	synovial membrane B-cell (unspecified)		10	0	0	0	0	0	0	0
peripheral blood plasmablast > plasmablast > antibody-secreting cell > B-cell lineage > lymphocyte > lymphoid leukocyte > leukocyte > hematopoietic and immune system cell > Cell type	peripheral blood plasmablast	A peripheral blood activated mature B-cell that is secreting immunoglobulin, typified by being CD27-positive, CD38-positive, CD138-negative.	4	0	0	0	0	0	0	0
peripheral blood antibody-secreting cell (unspecified) > antibody-secreting cell > B-cell lineage > lymphocyte > lymphoid leukocyte > leukocyte > hematopoietic and immune system cell > Cell type	peripheral blood antibody-secreting cell (unspecified)		3	0	0	0	0	0	0	0
T-cell > T-cell lineage > lymphocyte > lymphoid leukocyte > leukocyte > hematopoietic and immune system cell > Cell type	T-cell	Synonym: T-lymphocyte.	11	0	0	0	0	0	0	0
CD4 T-cell > T-cell > T-cell lineage > lymphocyte > lymphoid leukocyte > leukocyte > hematopoietic and immune system cell > Cell type	CD4 T-cell		72	0	0	0	0	0	0	0
peripheral blood CD4 T-cell (unspecified) > CD4 T-cell (unspecified) > CD4 T-cell > T-cell > T-cell lineage > lymphocyte > lymphoid leukocyte > leukocyte > hematopoietic and immune system cell > Cell type	peripheral blood CD4 T-cell (unspecified)		183	0	0	0	0	0	0	0
peripheral blood CD4 activated T-cell (unspecified) > peripheral blood CD4 T-cell (unspecified) > CD4 T-cell (unspecified) > CD4 T-cell > T-cell > T-cell lineage > lymphocyte > lymphoid leukocyte > leukocyte > hematopoietic and immune system cell > Cell type	peripheral blood CD4 activated T-cell (unspecified)		229	0.00229275	0.00124202	0	0	0	0	0
peripheral blood CD4 resting T-cell (unspecified) > peripheral blood CD4 T-cell (unspecified) > CD4 T-cell (unspecified) > CD4 T-cell > T-cell > T-cell lineage > lymphocyte > lymphoid leukocyte > leukocyte > hematopoietic and immune system cell > Cell type	peripheral blood CD4 resting T-cell (unspecified)		32	0	0	0	0	0	0	0
breast tissue CD4 T-cell (unspecified) > CD4 T-cell (unspecified) > CD4 T-cell > T-cell > T-cell lineage > lymphocyte > lymphoid leukocyte > leukocyte > hematopoietic and immune system cell > Cell type	breast tissue CD4 T-cell (unspecified)		6	0.180363	0.16379	0	0	0	0.0858711	0.0858711
oral mucosa CD4 T-cell (unspecified) > CD4 T-cell (unspecified) > CD4 T-cell > T-cell > T-cell lineage > lymphocyte > lymphoid leukocyte > leukocyte > hematopoietic and immune system cell > Cell type	oral mucosa CD4 T-cell (unspecified)		19	0	0	0	0	0	0	0
tumor derived CD4 T-cell (unspecified) > CD4 T-cell (unspecified) > CD4 T-cell > T-cell > T-cell lineage > lymphocyte > lymphoid leukocyte > leukocyte > hematopoietic and immune system cell > Cell type	tumor derived CD4 T-cell (unspecified)		9	0	0	0	0	0	0	0
peripheral blood CD4 naive T-cell > CD4 naive T-cell > CD4 T-cell > T-cell > T-cell lineage > lymphocyte > lymphoid leukocyte > leukocyte > hematopoietic and immune system cell > Cell type	peripheral blood CD4 naive T-cell		236	0.0132418	0.00339909	0	0	0	0	0
tonsillar CD4 naive T-cell > CD4 naive T-cell > CD4 T-cell > T-cell > T-cell lineage > lymphocyte > lymphoid leukocyte > leukocyte > hematopoietic and immune system cell > Cell type	tonsillar CD4 naive T-cell		4	0	0	0	0	0	0	0
peripheral blood CD4 helper T-cell (unspecified) > CD4 helper T-cell (unspecified) > CD4 helper T-cell > CD4 T-cell > T-cell > T-cell lineage > lymphocyte > lymphoid leukocyte > leukocyte > hematopoietic and immune system cell > Cell type	peripheral blood CD4 helper T-cell (unspecified)		12	0	0	0	0	0	0	0
tonsillar CD4 helper T-cell (unspecified) > CD4 helper T-cell (unspecified) > CD4 helper T-cell > CD4 T-cell > T-cell > T-cell lineage > lymphocyte > lymphoid leukocyte > leukocyte > hematopoietic and immune system cell > Cell type	tonsillar CD4 helper T-cell (unspecified)		3	0	0	0	0	0	0	0
peripheral blood Th1 T-cell > Th1 T-cell > CD4 helper T-cell > CD4 T-cell > T-cell > T-cell lineage > lymphocyte > lymphoid leukocyte > leukocyte > hematopoietic and immune system cell > Cell type	peripheral blood Th1 T-cell		19	0.0290081	0.0290081	0	0	0	0	0
pulmonary Th1 T-cell > Th1 T-cell > CD4 helper T-cell > CD4 T-cell > T-cell > T-cell lineage > lymphocyte > lymphoid leukocyte > leukocyte > hematopoietic and immune system cell > Cell type	pulmonary Th1 T-cell		1	0	NaN	0	0	0	0	0
colonic Th1 T-cell > Th1 T-cell > CD4 helper T-cell > CD4 T-cell > T-cell > T-cell lineage > lymphocyte > lymphoid leukocyte > leukocyte > hematopoietic and immune system cell > Cell type	colonic Th1 T-cell		6	0	0	0	0	0	0	0
tumor derived Th1 T-cell > Th1 T-cell > CD4 helper T-cell > CD4 T-cell > T-cell > T-cell lineage > lymphocyte > lymphoid leukocyte > leukocyte > hematopoietic and immune system cell > Cell type	tumor derived Th1 T-cell		13	0	0	0	0	0	0	0
peripheral blood Th2 T-cell > Th2 T-cell > CD4 helper T-cell > CD4 T-cell > T-cell > T-cell lineage > lymphocyte > lymphoid leukocyte > leukocyte > hematopoietic and immune system cell > Cell type	peripheral blood Th2 T-cell		4	0	0	0	0	0	0	0
peripheral blood Th17 T-cell > Th17 T-cell > CD4 helper T-cell > CD4 T-cell > T-cell > T-cell lineage > lymphocyte > lymphoid leukocyte > leukocyte > hematopoietic and immune system cell > Cell type	peripheral blood Th17 T-cell		22	0	0	0	0	0	0	0
colonic Th17 T-cell > Th17 T-cell > CD4 helper T-cell > CD4 T-cell > T-cell > T-cell lineage > lymphocyte > lymphoid leukocyte > leukocyte > hematopoietic and immune system cell > Cell type	colonic Th17 T-cell		6	0.00580022	0.00580022	0	0	0	0	0
tumor derived Th17 T-cell > Th17 T-cell > CD4 helper T-cell > CD4 T-cell > T-cell > T-cell lineage > lymphocyte > lymphoid leukocyte > leukocyte > hematopoietic and immune system cell > Cell type	tumor derived Th17 T-cell		11	0	0	0	0	0	0	0
tonsillar CD4 follicular helper T-cell > CD4 follicular helper T-cell > CD4 helper T-cell > CD4 T-cell > T-cell > T-cell lineage > lymphocyte > lymphoid leukocyte > leukocyte > hematopoietic and immune system cell > Cell type	tonsillar CD4 follicular helper T-cell	Synonym: T-follicular helper cell. A CD4-positive alpha-beta T cell located in follicles of tonsils, that is typically described as CXCR5-positive, CCR7-negative, BCL6-high, ICOS-high and PD1-high, and stimulates follicular B cells to undergo class-switching and antibody production.	3	0	0	0	0	0	0	0
peripheral blood CD4 follicular helper T-cell > CD4 follicular helper T-cell > CD4 helper T-cell > CD4 T-cell > T-cell > T-cell lineage > lymphocyte > lymphoid leukocyte > leukocyte > hematopoietic and immune system cell > Cell type	peripheral blood CD4 follicular helper T-cell	Synonym: T-follicular helper cell. A CD4-positive alpha-beta T cell located in follicles of tonsils, that is typically described as CXCR5-positive, CCR7-negative, BCL6-high, ICOS-high and PD1-high, and stimulates follicular B cells to undergo class-switching and antibody production.	135	0.00623832	0.00440824	0	0	0	0	0
peripheral blood CD4 memory T-cell (unspecified) > CD4 memory T-cell (unspecified) > CD4 memory T-cell > CD4 T-cell > T-cell > T-cell lineage > lymphocyte > lymphoid leukocyte > leukocyte > hematopoietic and immune system cell > Cell type	peripheral blood CD4 memory T-cell (unspecified)		59	0.000737471	0.000737471	0	0	0	0	0
peripheral blood CD4 central memory T-cell > CD4 central memory T-cell > CD4 memory T-cell > CD4 T-cell > T-cell > T-cell lineage > lymphocyte > lymphoid leukocyte > leukocyte > hematopoietic and immune system cell > Cell type	peripheral blood CD4 central memory T-cell		17	0	0	0	0	0	0	0
peripheral blood CD4 effector memory T-cell > CD4 effector memory T-cell > CD4 memory T-cell > CD4 T-cell > T-cell > T-cell lineage > lymphocyte > lymphoid leukocyte > leukocyte > hematopoietic and immune system cell > Cell type	peripheral blood CD4 effector memory T-cell		50	0	0	0	0	0	0	0
splenic CD4 effector memory T-cell > CD4 effector memory T-cell > CD4 memory T-cell > CD4 T-cell > T-cell > T-cell lineage > lymphocyte > lymphoid leukocyte > leukocyte > hematopoietic and immune system cell > Cell type	splenic CD4 effector memory T-cell		3	0	0	0	0	0	0	0
peripheral blood CD4 effector memory RA T-cell > CD4 effector memory RA T-cell > CD4 memory T-cell > CD4 T-cell > T-cell > T-cell lineage > lymphocyte > lymphoid leukocyte > leukocyte > hematopoietic and immune system cell > Cell type	peripheral blood CD4 effector memory RA T-cell		2	0	0	0	0	0	0	0
splenic CD4 resident memory T-cell > CD4 tissue-resident memory T-cell > CD4 memory T-cell > CD4 T-cell > T-cell > T-cell lineage > lymphocyte > lymphoid leukocyte > leukocyte > hematopoietic and immune system cell > Cell type	splenic CD4 resident memory T-cell		3	0.0979538	0.0979538	0	0	0	0.293861	0.293861
CD4 memory Th1 precursor T-cell > CD4 memory T-cell > CD4 T-cell > T-cell > T-cell lineage > lymphocyte > lymphoid leukocyte > leukocyte > hematopoietic and immune system cell > Cell type	CD4 memory Th1 precursor T-cell		7	0.0624608	0.0624608	0	0	0	0	0
CD4 memory Th2 precursor T-cell > CD4 memory T-cell > CD4 T-cell > T-cell > T-cell lineage > lymphocyte > lymphoid leukocyte > leukocyte > hematopoietic and immune system cell > Cell type	CD4 memory Th2 precursor T-cell		8	0	0	0	0	0	0	0
CD4 memory Th17 precursor T-cell > CD4 memory T-cell > CD4 T-cell > T-cell > T-cell lineage > lymphocyte > lymphoid leukocyte > leukocyte > hematopoietic and immune system cell > Cell type	CD4 memory Th17 precursor T-cell		8	0	0	0	0	0	0	0
CD4 regulatory T-cell (unspecified) > CD4 regulatory T-cell > CD4 T-cell > T-cell > T-cell lineage > lymphocyte > lymphoid leukocyte > leukocyte > hematopoietic and immune system cell > Cell type	CD4 regulatory T-cell (unspecified)		25	0	0	0	0	0	0	0
peripheral blood CD4 regulatory T-cell (unspecified) > CD4 regulatory T-cell (unspecified) > CD4 regulatory T-cell > CD4 T-cell > T-cell > T-cell lineage > lymphocyte > lymphoid leukocyte > leukocyte > hematopoietic and immune system cell > Cell type	peripheral blood CD4 regulatory T-cell (unspecified)		85	0	0	0	0	0	0	0
breast tissue CD4 regulatory T-cell (unspecified) > CD4 regulatory T-cell (unspecified) > CD4 regulatory T-cell > CD4 T-cell > T-cell > T-cell lineage > lymphocyte > lymphoid leukocyte > leukocyte > hematopoietic and immune system cell > Cell type	breast tissue CD4 regulatory T-cell (unspecified)		6	0	0	0	0	0	0	0
colonic CD4 regulatory T-cell (unspecified) > CD4 regulatory T-cell (unspecified) > CD4 regulatory T-cell > CD4 T-cell > T-cell > T-cell lineage > lymphocyte > lymphoid leukocyte > leukocyte > hematopoietic and immune system cell > Cell type	colonic CD4 regulatory T-cell (unspecified)		7	0	0	0	0	0	0	0
tumor derived CD4 regulatory T-cell (unspecified) > CD4 regulatory T-cell (unspecified) > CD4 regulatory T-cell > CD4 T-cell > T-cell > T-cell lineage > lymphocyte > lymphoid leukocyte > leukocyte > hematopoietic and immune system cell > Cell type	tumor derived CD4 regulatory T-cell (unspecified)		28	0.0229444	0.0229445	0	0	0	0	0
peripheral blood CD4 naive regulatory T-cell > CD4 naive regulatory T-cell > CD4 regulatory T-cell > CD4 T-cell > T-cell > T-cell lineage > lymphocyte > lymphoid leukocyte > leukocyte > hematopoietic and immune system cell > Cell type	peripheral blood CD4 naive regulatory T-cell		5	0.00527024	0.00527024	0	0	0	0	0
CD4 memory regulatory T-cell > CD4 regulatory T-cell > CD4 T-cell > T-cell > T-cell lineage > lymphocyte > lymphoid leukocyte > leukocyte > hematopoietic and immune system cell > Cell type	CD4 memory regulatory T-cell		20	0	0	0	0	0	0	0
peripheral blood CD4 memory regulatory T-cell > CD4 memory regulatory T-cell > CD4 regulatory T-cell > CD4 T-cell > T-cell > T-cell lineage > lymphocyte > lymphoid leukocyte > leukocyte > hematopoietic and immune system cell > Cell type	peripheral blood CD4 memory regulatory T-cell		17	0	0	0	0	0	0	0
peripheral blood CD8 T-cell (unspecified) > CD8 T-cell (unspecified) > CD8 T-cell > T-cell > T-cell lineage > lymphocyte > lymphoid leukocyte > leukocyte > hematopoietic and immune system cell > Cell type	peripheral blood CD8 T-cell (unspecified)		98	0	0	0	0	0	0	0
peripheral blood CD8 activated T-cell (unspecified) > peripheral blood CD8 T-cell (unspecified) > CD8 T-cell (unspecified) > CD8 T-cell > T-cell > T-cell lineage > lymphocyte > lymphoid leukocyte > leukocyte > hematopoietic and immune system cell > Cell type	peripheral blood CD8 activated T-cell (unspecified)		91	0.0265234	0.0155555	0	0	0	0	0
peripheral blood CD8 resting T-cell (unspecified) > peripheral blood CD8 T-cell (unspecified) > CD8 T-cell (unspecified) > CD8 T-cell > T-cell > T-cell lineage > lymphocyte > lymphoid leukocyte > leukocyte > hematopoietic and immune system cell > Cell type	peripheral blood CD8 resting T-cell (unspecified)		8	0	0	0	0	0	0	0
pulmonary CD8 T-cell (unspecified) > CD8 T-cell (unspecified) > CD8 T-cell > T-cell > T-cell lineage > lymphocyte > lymphoid leukocyte > leukocyte > hematopoietic and immune system cell > Cell type	pulmonary CD8 T-cell (unspecified)		32	0.363117	0.122263	0	0	0	0.476442	1.08088
skin CD8 T-cell (unspecified) > CD8 T-cell (unspecified) > CD8 T-cell > T-cell > T-cell lineage > lymphocyte > lymphoid leukocyte > leukocyte > hematopoietic and immune system cell > Cell type	skin CD8 T-cell (unspecified)		12	0.11089	0.0885827	0	0	0	0	0
tumor derived CD8 T-cell (unspecified) > CD8 T-cell (unspecified) > CD8 T-cell > T-cell > T-cell lineage > lymphocyte > lymphoid leukocyte > leukocyte > hematopoietic and immune system cell > Cell type	tumor derived CD8 T-cell (unspecified)		77	0.0840508	0.0313737	0	0	0	0	0
peripheral blood CD8 naive T-cell > CD8 naive T-cell > CD8 T-cell > T-cell > T-cell lineage > lymphocyte > lymphoid leukocyte > leukocyte > hematopoietic and immune system cell > Cell type	peripheral blood CD8 naive T-cell		13	0	0	0	0	0	0	0
peripheral blood CD8 memory T-cell (unspecified) > CD8 memory T-cell (unspecified) > CD8 memory T-cell > CD8 T-cell > T-cell > T-cell lineage > lymphocyte > lymphoid leukocyte > leukocyte > hematopoietic and immune system cell > Cell type	peripheral blood CD8 memory T-cell (unspecified)		64	0.0186194	0.00844145	0	0	0	0	0
peripheral blood CD8 central memory T-cell > CD8 central memory T-cell > CD8 memory T-cell > CD8 T-cell > T-cell > T-cell lineage > lymphocyte > lymphoid leukocyte > leukocyte > hematopoietic and immune system cell > Cell type	peripheral blood CD8 central memory T-cell		11	0	0	0	0	0	0	0
peripheral blood CD8 effector memory T-cell > CD8 effector memory T-cell > CD8 memory T-cell > CD8 T-cell > T-cell > T-cell lineage > lymphocyte > lymphoid leukocyte > leukocyte > hematopoietic and immune system cell > Cell type	peripheral blood CD8 effector memory T-cell		27	0	0	0	0	0	0	0
peripheral blood CD8 activated effector memory T-cell > peripheral blood CD8 effector memory T-cell > CD8 effector memory T-cell > CD8 memory T-cell > CD8 T-cell > T-cell > T-cell lineage > lymphocyte > lymphoid leukocyte > leukocyte > hematopoietic and immune system cell > Cell type	peripheral blood CD8 activated effector memory T-cell		6	0	0	0	0	0	0	0
peripheral blood CD8 resting effector memory T-cell > peripheral blood CD8 effector memory T-cell > CD8 effector memory T-cell > CD8 memory T-cell > CD8 T-cell > T-cell > T-cell lineage > lymphocyte > lymphoid leukocyte > leukocyte > hematopoietic and immune system cell > Cell type	peripheral blood CD8 resting effector memory T-cell		6	0	0	0	0	0	0	0
splenic CD8 effector memory T-cell > CD8 effector memory T-cell > CD8 memory T-cell > CD8 T-cell > T-cell > T-cell lineage > lymphocyte > lymphoid leukocyte > leukocyte > hematopoietic and immune system cell > Cell type	splenic CD8 effector memory T-cell		3	0	0	0	0	0	0	0
peripheral blood CD8 effector memory RA T-cell > CD8 effector memory RA T-cell > CD8 memory T-cell > CD8 T-cell > T-cell > T-cell lineage > lymphocyte > lymphoid leukocyte > leukocyte > hematopoietic and immune system cell > Cell type	peripheral blood CD8 effector memory RA T-cell		4	0	0	0	0	0	0	0
peripheral blood CD8 activated effector memory RA T-cell > peripheral blood CD8 effector memory RA T-cell > CD8 effector memory RA T-cell > CD8 memory T-cell > CD8 T-cell > T-cell > T-cell lineage > lymphocyte > lymphoid leukocyte > leukocyte > hematopoietic and immune system cell > Cell type	peripheral blood CD8 activated effector memory RA T-cell		5	0	0	0	0	0	0	0
peripheral blood CD8 resting effector memory RA T-cell > peripheral blood CD8 effector memory RA T-cell > CD8 effector memory RA T-cell > CD8 memory T-cell > CD8 T-cell > T-cell > T-cell lineage > lymphocyte > lymphoid leukocyte > leukocyte > hematopoietic and immune system cell > Cell type	peripheral blood CD8 resting effector memory RA T-cell		6	0	0	0	0	0	0	0
splenic CD8 resident memory T-cell > tissue-resident CD8 memory T-cell > CD8 memory T-cell > CD8 T-cell > T-cell > T-cell lineage > lymphocyte > lymphoid leukocyte > leukocyte > hematopoietic and immune system cell > Cell type	splenic CD8 resident memory T-cell		3	0	0	0	0	0	0	0
skin CD8 resident memory T-cell > tissue-resident CD8 memory T-cell > CD8 memory T-cell > CD8 T-cell > T-cell > T-cell lineage > lymphocyte > lymphoid leukocyte > leukocyte > hematopoietic and immune system cell > Cell type	skin CD8 resident memory T-cell		14	0.27048	0.189429	0	0	0	0	0
peripheral blood NK T-cell (unspecified) > NK T-cell (unspecified) > NK T-cell > T-cell > T-cell lineage > lymphocyte > lymphoid leukocyte > leukocyte > hematopoietic and immune system cell > Cell type	peripheral blood NK T-cell (unspecified)	Synonym: Natural killer T-cell from peripheral blood, not further specified.	9	0	0	0	0	0	0	0
peripheral blood type I NK T-cell > type I NK T-cell > NK T-cell > T-cell > T-cell lineage > lymphocyte > lymphoid leukocyte > leukocyte > hematopoietic and immune system cell > Cell type	peripheral blood type I NK T-cell		10	0	0	0	0	0	0	0
memory NK T-cell > NK T-cell > T-cell > T-cell lineage > lymphocyte > lymphoid leukocyte > leukocyte > hematopoietic and immune system cell > Cell type	memory NK T-cell		1	0	NaN	0	0	0	0	0
intestinal intraepithelial gd T-cell (unspecified) > gamma-delta T-cell (unspecified) > gamma-delta T-cell > T-cell > T-cell lineage > lymphocyte > lymphoid leukocyte > leukocyte > hematopoietic and immune system cell > Cell type	intestinal intraepithelial gd T-cell (unspecified)		34	0	0	0	0	0	0	0
peripheral blood gd T-cell (unspecified) > gamma-delta T-cell (unspecified) > gamma-delta T-cell > T-cell > T-cell lineage > lymphocyte > lymphoid leukocyte > leukocyte > hematopoietic and immune system cell > Cell type	peripheral blood gd T-cell (unspecified)		27	0	0	0	0	0	0	0
peripheral blood T-cell (unspecified) > T-cell (unspecified) > T-cell > T-cell lineage > lymphocyte > lymphoid leukocyte > leukocyte > hematopoietic and immune system cell > Cell type	peripheral blood T-cell (unspecified)		912	0.00475725	0.00180301	0	0	0	0	0
peripheral blood regulatory T-cell (unspecified) > regulatory T-cell (unspecified) > T-cell > T-cell lineage > lymphocyte > lymphoid leukocyte > leukocyte > hematopoietic and immune system cell > Cell type	peripheral blood regulatory T-cell (unspecified)		4	0	0	0	0	0	0	0
peripheral blood mucosal associated invariant T cell > mucosal associated invariant T cell (MAIT) > T-cell > T-cell lineage > lymphocyte > lymphoid leukocyte > leukocyte > hematopoietic and immune system cell > Cell type	peripheral blood mucosal associated invariant T cell		4	0	0	0	0	0	0	0
natural killer cell > group 1 innate lymphoid cell > innate lymphoid cell > lymphoid leukocyte > leukocyte > hematopoietic and immune system cell > Cell type	natural killer cell	A lymphocyte that can spontaneously kill a variety of target cells without prior antigenic activation via germline encoded activation receptors and also regulate immune responses via cytokine release and direct contact with other cells.	1	0	NaN	0	0	0	0	0
peripheral blood natural killer cell > natural killer cell > group 1 innate lymphoid cell > innate lymphoid cell > lymphoid leukocyte > leukocyte > hematopoietic and immune system cell > Cell type	peripheral blood natural killer cell		73	0.0045377	0.0045377	0	0	0	0	0
tonsillar innate lymphoid cell 1 > innate lymphoid cell 1 > group 1 innate lymphoid cell > innate lymphoid cell > lymphoid leukocyte > leukocyte > hematopoietic and immune system cell > Cell type	tonsillar innate lymphoid cell 1	A group 1 innate lymphoid cell other than natural killer cells, isolated from a tonsil.	1	0	NaN	0	0	0	0	0
group 2 innate lymphoid cell > innate lymphoid cell > lymphoid leukocyte > leukocyte > hematopoietic and immune system cell > Cell type	group 2 innate lymphoid cell	An innate lymphoid cell that is capable of producing T-helper 2-cell associated cytokines upon stimulation.	6	0	0	0	0	0	0	0
peripheral blood group 2 innate lymphoid cell > group 2 innate lymphoid cell > innate lymphoid cell > lymphoid leukocyte > leukocyte > hematopoietic and immune system cell > Cell type	peripheral blood group 2 innate lymphoid cell		6	0.00687621	0.00687621	0	0	0	0	0
peripheral blood group 3 innate lymphoid cell > group 3 innate lymphoid cell > innate lymphoid cell > lymphoid leukocyte > leukocyte > hematopoietic and immune system cell > Cell type	peripheral blood group 3 innate lymphoid cell		2	0	0	0	0	0	0	0
tonsillar group 3 innate lymphoid cell > group 3 innate lymphoid cell > innate lymphoid cell > lymphoid leukocyte > leukocyte > hematopoietic and immune system cell > Cell type	tonsillar group 3 innate lymphoid cell	An innate lymphoid cell that expresses RORgt and is capable of expressing IL17A and/or IL-22, isolated from a tonsil.	6	0	0	0	0	0	0	0
granulocyte (polymorphonuclear leukocyte) > myeloid leukocyte > leukocyte > hematopoietic and immune system cell > Cell type	granulocyte (polymorphonuclear leukocyte)		1	0	NaN	0	0	0	0	0
blood low density basophil granulocyte > blood basophil granulocyte > basophil granulocyte > granulocyte (polymorphonuclear leukocyte) > myeloid leukocyte > leukocyte > hematopoietic and immune system cell > Cell type	blood low density basophil granulocyte		4	0	0	0	0	0	0	0
peripheral blood eosinophil granulocyte > eosinophil granulocyte > granulocyte (polymorphonuclear leukocyte) > myeloid leukocyte > leukocyte > hematopoietic and immune system cell > Cell type	peripheral blood eosinophil granulocyte		2	0	0	0	0	0	0	0
neutrophil granulocyte > granulocyte (polymorphonuclear leukocyte) > myeloid leukocyte > leukocyte > hematopoietic and immune system cell > Cell type	neutrophil granulocyte		34	0.0123217	0.00858	0	0	0	0	0
peripheral blood neutrophil granulocyte > neutrophil granulocyte > granulocyte (polymorphonuclear leukocyte) > myeloid leukocyte > leukocyte > hematopoietic and immune system cell > Cell type	peripheral blood neutrophil granulocyte		157	0.00671243	0.00248892	0	0	0	0	0
blood low density neutrophil granulocyte > peripheral blood neutrophil granulocyte > neutrophil granulocyte > granulocyte (polymorphonuclear leukocyte) > myeloid leukocyte > leukocyte > hematopoietic and immune system cell > Cell type	blood low density neutrophil granulocyte		27	0.016642	0.00709253	0	0	0	0	0
synovial fluid neutrophil granulocyte > neutrophil granulocyte > granulocyte (polymorphonuclear leukocyte) > myeloid leukocyte > leukocyte > hematopoietic and immune system cell > Cell type	synovial fluid neutrophil granulocyte		6	0	0	0	0	0	0	0
monocyte > myeloid leukocyte > leukocyte > hematopoietic and immune system cell > Cell type	monocyte		143	0	0	0	0	0	0	0
peripheral blood monocyte > monocyte > myeloid leukocyte > leukocyte > hematopoietic and immune system cell > Cell type	peripheral blood monocyte		725	0.000893892	0.000469175	0	0	0	0	0
peripheral blood classical monocyte > peripheral blood monocyte > monocyte > myeloid leukocyte > leukocyte > hematopoietic and immune system cell > Cell type	peripheral blood classical monocyte	Synonym: inflammatory monocyte. Typical markers: CCR2-positive, CXCCR1 - low (human, mouse, rat). In humans typically CD14-high, CD16-negative. A monocyte that responds rapidly to microbial stimuli by secreting cytokines and antimicrobial factors and which is typically characterized by high expression of CCR2 in both rodents and humans, negative for the lineage markers CD3, CD19, and CD20, and of…	4	0	0	0	0	0	0	0
peripheral blood intermediate monocyte > peripheral blood monocyte > monocyte > myeloid leukocyte > leukocyte > hematopoietic and immune system cell > Cell type	peripheral blood intermediate monocyte	A monocyte that has characteristics of both patrolling and inflammatory monocytes. In humans typically CD14-positive and with low amounts of CD16.	4	0	0	0	0	0	0	0
peripheral blood non-classical monocyte > peripheral blood monocyte > monocyte > myeloid leukocyte > leukocyte > hematopoietic and immune system cell > Cell type	peripheral blood non-classical monocyte	Synonym: patrolling monocyte, resident monocyte. A type of monocyte typically characterized by low expression of CCR2, low responsiveness to monocyte chemoattractant CCL2/MCP1, low phagocytic activity, and decrease size relative to classical monocytes, but increased co-stimulatory activity. In humans typically CD14-low, CD16-positive.	8	0	0	0	0	0	0	0
macrophage > myeloid leukocyte > leukocyte > hematopoietic and immune system cell > Cell type	macrophage		29	0.0109146	0.0109146	0	0	0	0	0
monocyte derived macrophage > macrophage > myeloid leukocyte > leukocyte > hematopoietic and immune system cell > Cell type	monocyte derived macrophage		807	0	0	0	0	0	0	0
M0 monocyte derived macrophage > monocyte derived macrophage > macrophage > myeloid leukocyte > leukocyte > hematopoietic and immune system cell > Cell type	M0 monocyte derived macrophage	Synonym: non-polarized monocyte derived macrophage, naive monocyte derived macrophage, resting monocyte derived macrophage	5	0	0	0	0	0	0	0
M1 monocyte derived macrophage > monocyte derived macrophage > macrophage > myeloid leukocyte > leukocyte > hematopoietic and immune system cell > Cell type	M1 monocyte derived macrophage	Synonym: classically activated monocyte derived macrophage	5	0	0	0	0	0	0	0
M2 monocyte derived macrophage > monocyte derived macrophage > macrophage > myeloid leukocyte > leukocyte > hematopoietic and immune system cell > Cell type	M2 monocyte derived macrophage	Synonym: alternatively activated monocyte derived macrophage	5	0	0	0	0	0	0	0
alveolar macrophage > pulmonary macrophage > macrophage > myeloid leukocyte > leukocyte > hematopoietic and immune system cell > Cell type	alveolar macrophage		81	0.00299669	0.00228427	0	0	0	0	0
bone marrow derived mast cell > mast cell > myeloid leukocyte > leukocyte > hematopoietic and immune system cell > Cell type	bone marrow derived mast cell		24	0	0	0	0	0	0	0
monocyte derived dendritic cell > dendritic cell > leukocyte > hematopoietic and immune system cell > Cell type	monocyte derived dendritic cell		132	8.7807e-05	8.78071e-05	0	0	0	0	0
conventional dendritic cell > dendritic cell > leukocyte > hematopoietic and immune system cell > Cell type	conventional dendritic cell	Synonyms: classical dendritic cell, myeloid dendritic cell. Typically described as CD11c-high.	8	0	0	0	0	0	0	0
peripheral blood conventional dendritic cell > conventional dendritic cell > dendritic cell > leukocyte > hematopoietic and immune system cell > Cell type	peripheral blood conventional dendritic cell	Synonyms: peripheral blood classical dendritic cell, peripheral blood myeloid dendritic cell. Typically described as CD11c-high.	18	0	0	0	0	0	0	0
plasmacytoid dendritic cell > dendritic cell > leukocyte > hematopoietic and immune system cell > Cell type	plasmacytoid dendritic cell	Synonyms: lymphoid dendritic cell, interferon-producing dendritic cell. A dendritic cell type of distinct morphology, localization, and surface marker expression from other dendritic cell types and associated with early stage immune responses, particularly the release of physiologically abundant amounts of type I interferons in response to infection.	31	0.00982107	0.00876435	0	0	0	0	0
peripheral blood plasmacytoid dendritic cell > plasmacytoid dendritic cell > dendritic cell > leukocyte > hematopoietic and immune system cell > Cell type	peripheral blood plasmacytoid dendritic cell	Synonyms: peripheral blood lymphoid dendritic cell, peripheral blood interferon-producing dendritic cell. A dendritic cell type of distinct morphology, localization, and surface marker expression from other dendritic cell types and associated with early stage immune responses, particularly the release of physiologically abundant amounts of type I interferons in response to infection.	69	0.00301802	0.00182581	0	0	0	0	0
platelet (thrombocyte) > myeloid cell > hematopoietic and immune system cell > Cell type	platelet (thrombocyte)		319	0.14014	0.0204568	0	0	0	0	0
osteoblast > bone cell > bone tissue cell > skeletal system cell > musculoskeletal system cell > Cell type	osteoblast		31	0.0217723	0.0117564	0	0	0	0	0
joint synovial fibroblast > joint synovial cell > joint capsule cell > joint cell > skeletal system cell > musculoskeletal system cell > Cell type	joint synovial fibroblast		12	0.0040276	0.0040276	0	0	0	0	0
brain microglia cell > microglia cell > glia cell > central nervous system cell > nervous system cell > Cell type	brain microglia cell		6	0	0	0	0	0	0	0
oculomotor nucleus motor neuron > periaqueductal grey neuron (unspecified) > periaqueductal grey neuron > cerebral peduncle neuron (unspecified) > cerebral peduncle neuron > midbrain neuron (unspecified) > midbrain neuron > brain neuron > neuron > central nervous system cell > nervous system cell > Cell type	oculomotor nucleus motor neuron		18	0.0885688	0.0885688	0	0	0	0	0
spinal cord motor neuron > spinal cord neuron > neuron > central nervous system cell > nervous system cell > Cell type	spinal cord motor neuron		11	0	0	0	0	0	0	0
Onuf's nucleus motor neuron > spinal cord motor neuron > spinal cord neuron > neuron > central nervous system cell > nervous system cell > Cell type	Onuf's nucleus motor neuron		7	0	0	0	0	0	0	0
cumulus granulosa cell > ovarian granulosa cell > ovarian follicle cell > ovarian cortex cell > ovary (female gonad) cell > female reproductive system cell > reproductive system cell > Cell type	cumulus granulosa cell		3	0	0	0	0	0	0	0
mural granulosa cell > ovarian granulosa cell > ovarian follicle cell > ovarian cortex cell > ovary (female gonad) cell > female reproductive system cell > reproductive system cell > Cell type	mural granulosa cell		3	0	0	0	0	0	0	0
cumulus cell > ovarian follicle cell > ovarian cortex cell > ovary (female gonad) cell > female reproductive system cell > reproductive system cell > Cell type	cumulus cell		5	0.00373034	0.00373034	0	0	0	0	0
pulmonary (lung) fibroblast > pulmonary (lung) mucosa cell > lung cell > respiratory system cell > Cell type	pulmonary (lung) fibroblast	----	18	0	0	0	0	0	0	0
bronchial smooth muscle cell > large airway cell > bronchoalveolar system cell > lung cell > respiratory system cell > Cell type	bronchial smooth muscle cell	----	49	0	0	0	0	0	0	0
cuboidal alveolar type 2 cell (AT2) > pneumocyte > alveolar epithelium cell > alveolar cell > alveolar sac cell > bronchoalveolar system cell > lung cell > respiratory system cell > Cell type	cuboidal alveolar type 2 cell (AT2)		6	0.0194236	0.0194236	0	0	0	0	0
cornea cell > eye cell > sensory organ system cell > Cell type	cornea cell		6	0	0	0	0	0	0	0
corneal limbus cell > cornea cell > eye cell > sensory organ system cell > Cell type	corneal limbus cell		6	0.0241298	0.0241298	0	0	0	0	0
sclera cell > eye cell > sensory organ system cell > Cell type	sclera cell		6	0.00824262	0.00824262	0	0	0	0	0
subcutaneous adipose tissue (SAT) cell > adipose tissue (fat) cell > connective tissue cell > Cell type	subcutaneous adipose tissue (SAT) cell		206	0.0184683	0.00342494	0	0	0	0	0
primary intestinal organoid > Organotypic / 3D culture	primary intestinal organoid	Organoids derived from primary cells of the small intestine.	22	0.00629181	0.00629181	0	0	0	0	0
liver organoid culture > Organotypic / 3D culture	liver organoid culture	Three-dimensional (3D) organoid culture from human liver.	8	0	0	0	0	0	0	0
fetal stomach organoid culture (11 PCW) > Organotypic / 3D culture	fetal stomach organoid culture (11 PCW)	Organoid cell culture derived from fetal stomach tissue obtained after pregnancy termination at 11 post conception week (PCW).	6	0	0	0	0	0	0	0
fetal stomach organoid culture (20 PCW) > Organotypic / 3D culture	fetal stomach organoid culture (20 PCW)	Organoid cell culture derived from fetal stomach tissue obtained after pregnancy termination at 20 post conception week (PCW).	6	0	0	0	0	0	0	0
stomach organoid culture (11y) > Organotypic / 3D culture	stomach organoid culture (11y)	Organoid cell culture derived from gastric surgical biopsy of 11-year old child.	6	0	0	0	0	0	0	0

## Sheet: C6orf118 Human Microarray
(log2 scale)			Gene Symbol	C6orf118	C6orf118	C6orf118	C6orf118	C6orf118	C6orf118	C6orf118
			Gene	ENSG00000112539	ENSG00000112539	ENSG00000112539	ENSG00000112539	ENSG00000112539	ENSG00000112539	ENSG00000112539
			Measure	232777_s_at	232777_s_at	232777_s_at	232777_s_at	232777_s_at	232777_s_at	232777_s_at
			Signal Background	7.35076	7.35076	7.35076	7.35076	7.35076	7.35076	7.35076
			Expression Potential	13.4158	13.4158	13.4158	13.4158	13.4158	13.4158	13.4158
Path to root	Anatomy	Description	# samples	Mean value	Standard Error	Median Value	Lower Whisker	Lower Quartile	Upper Quartile	Upper Whisker
nasal epithelium cell 3D culture > Organotypic / 3D culture	nasal epithelium cell 3D culture	Three-dimensional organotypic monoculture consists of nasal epithelium cells.	214	14.0803	0.0129141	14.111	13.6298	13.9789	14.2178	14.4304
bronchiolar (small airway) epithelium cell > bronchiolar (small airway) mucosa cell > bronchiolar (small airway) cell > bronchoalveolar system cell > lung cell > respiratory system cell > Cell type	bronchiolar (small airway) epithelium cell	----	624	13.3438	0.032688	13.4657	12.0097	13.0987	13.8308	14.7086
small airway epithelium cell 3D culture > Organotypic / 3D culture	small airway epithelium cell 3D culture	Three-dimensional organotypic monoculture consists of small airway epithelium cells.	142	13.426	0.0410509	13.3887	12.2896	13.162	13.8342	14.2305
lower lobe bronchiolar epithelium cell > bronchiolar (small airway) epithelium cell > bronchiolar (small airway) mucosa cell > bronchiolar (small airway) cell > bronchoalveolar system cell > lung cell > respiratory system cell > Cell type	lower lobe bronchiolar epithelium cell	----	14	13.4017	0.0625018	13.357	12.9612	13.2779	13.5975	13.8109
upper lobe bronchiolar epithelium cell > bronchiolar (small airway) epithelium cell > bronchiolar (small airway) mucosa cell > bronchiolar (small airway) cell > bronchoalveolar system cell > lung cell > respiratory system cell > Cell type	upper lobe bronchiolar epithelium cell	----	11	13.2635	0.128408	13.2074	12.786	12.9169	13.4347	14.0469
large airway epithelium cell > large airway mucosa cell > large airway cell > bronchoalveolar system cell > lung cell > respiratory system cell > Cell type	large airway epithelium cell	----	188	12.5084	0.093129	13.0633	10.2077	11.1464	13.6643	14.5466
tracheal epithelium cell > tracheal mucosa cell > trachea cell > respiratory system cell > Cell type	tracheal epithelium cell		44	12.9469	0.107536	13.0196	12.2609	12.8403	13.258	13.7711
lung epithelium cell 3D culture > Organotypic / 3D culture	lung epithelium cell 3D culture	Air-liquid interface (ALI) cell culture is an organotypic model for study of differentiated functional airway epithelium in vitro.	8	12.6624	0.19825	12.8087	11.8855	12.2213	13.1319	13.3153
bronchial organotypic tissue culture > Organotypic / 3D culture	bronchial organotypic tissue culture	The organotypic culture consists of bronchial primary human respiratory epithelial cells cocultured with primary human airway fibroblasts.	60	12.6087	0.0599135	12.6403	11.4586	12.3511	13.0024	13.258
nasal organotypic tissue culture > Organotypic / 3D culture	nasal organotypic tissue culture	The organotypic culture consists of nasal primary human respiratory epithelial cells cocultured with primary human airway fibroblasts.	60	12.4271	0.0618676	12.4354	11.4053	12.0743	12.8596	13.2534
bronchial epithelium cell 3D culture > Organotypic / 3D culture	bronchial epithelium cell 3D culture	The 3D culture consists of primary human bronchial epithelial cells.	118	11.9641	0.0411299	11.9185	11.0421	11.6704	12.2145	12.9768
epididymal caput > epididymal region > epididymis > male reproductive system > reproductive system > Tissue	epididymal caput		3	10.8342	1.17677	11.8805	8.48535	8.48535	12.1368	12.1368
amniotic fluid > extraembryonic tissue / fluid > gestational structure > Tissue	amniotic fluid		9	10.8548	0.0668544	10.8303	10.6115	10.7578	10.8905	10.8905
oviduct (fallopian tube) > female reproductive system > reproductive system > Tissue	oviduct (fallopian tube)		3	10.8123	0.456182	10.8138	10.0214	10.0214	11.6017	11.6017
nasal epithelium > nasal mucosa > nose > sensory organ system > Tissue	nasal epithelium		439	10.3586	0.0557811	10.2961	8.03491	9.35319	11.2623	12.9803
tonsillar memory B-cell (unspecified) > memory B-cell > mature B-cell > B-cell > B-cell lineage > lymphocyte > lymphoid leukocyte > leukocyte > hematopoietic and immune system cell > Cell type	tonsillar memory B-cell (unspecified)	A tonsillar memory B-cell is a mature B-cell that is long-lived, readily activated upon re-encounter of its antigenic determinant, and has been selected for expression of higher affinity immunoglobulin. This cell type is typically described as CD19-positive, CD20-positive, MHC Class II-positive, and CD138-negative. Along with plasma cells, memory B/cells are sometimes referred to as ‘post-germina…	6	10.121	0.128185	10.2623	9.60294	9.87495	10.3473	10.3765
bone marrow multipotent progenitor (MPP) cell > bone marrow hematopoietic stem / progenitor cell > hematopoietic stem / progenitor cell > hematopoietic and immune system cell > Cell type	bone marrow multipotent progenitor (MPP) cell		1	10.156	NaN	10.156	10.156	10.156	10.156	10.156
pulmonary Langerhans cell > Langerhans cell > conventional dendritic cell > dendritic cell > leukocyte > hematopoietic and immune system cell > Cell type	pulmonary Langerhans cell	Synonym: lung Langerhans’ cell, lung equivalent of epidermal Langerhans’ cell. A conventional dendritic cell expressing CD207 (langerin), isolated from the lung.	7	10.105	0.0467174	10.1338	9.94689	9.98088	10.2085	10.2476
tonsillar naive B-cell > naive B-cell > mature B-cell > B-cell > B-cell lineage > lymphocyte > lymphoid leukocyte > leukocyte > hematopoietic and immune system cell > Cell type	tonsillar naive B-cell	Synonym: tonsillar mature naive B-cell. A naive B-cell is a mature B-cell that is typically described as surface IgD-positive, surface IgM-positive, CD20-positive, CD27-negative and that has not yet been activated by antigen in the periphery.	6	10.1202	0.117388	10.1187	9.75225	9.87837	10.3534	10.4995
testis (male gonad) > male reproductive system > reproductive system > Tissue	testis (male gonad)		10	10.055	0.2412	10.0654	8.52474	9.63963	10.8368	10.9472
neutrophil granulocyte > granulocyte (polymorphonuclear leukocyte) > myeloid leukocyte > leukocyte > hematopoietic and immune system cell > Cell type	neutrophil granulocyte		99	9.97892	0.0379267	10.0477	9.70406	9.93223	10.1512	10.399
genu > corpus callosum > cerebral white matter > cerebral hemisphere > telencephalon (cerebrum) > forebrain (prosencephalon) > brain (encephalon) > central nervous system (CNS) > nervous system > Tissue	genu		32	10.0716	0.058489	10.0377	9.6317	9.85513	10.2373	10.665
peripheral blood activated memory B-cell (unspecified) > peripheral blood memory B-cell (unspecified) > memory B-cell > mature B-cell > B-cell > B-cell lineage > lymphocyte > lymphoid leukocyte > leukocyte > hematopoietic and immune system cell > Cell type	peripheral blood activated memory B-cell (unspecified)		23	9.74703	0.125875	9.99887	8.95588	9.59143	10.1228	10.4275
plasmacytoid dendritic cell > dendritic cell > leukocyte > hematopoietic and immune system cell > Cell type	plasmacytoid dendritic cell	Synonyms: lymphoid dendritic cell, interferon-producing dendritic cell. A dendritic cell type of distinct morphology, localization, and surface marker expression from other dendritic cell types and associated with early stage immune responses, particularly the release of physiologically abundant amounts of type I interferons in response to infection.	38	9.77456	0.123139	9.99286	8.88661	9.62324	10.1711	10.94
pulmonary conventional dendritic cell > conventional dendritic cell > dendritic cell > leukocyte > hematopoietic and immune system cell > Cell type	pulmonary conventional dendritic cell	Synonyms: pulmonary classical dendritic cell, pulmonary myeloid dendritic cell. Typically described as CD11c-high.	27	9.92355	0.0450004	9.95327	9.38074	9.72033	10.0885	10.2946
tonsillar plasmablast > plasmablast > antibody-secreting cell > B-cell lineage > lymphocyte > lymphoid leukocyte > leukocyte > hematopoietic and immune system cell > Cell type	tonsillar plasmablast	A tonsillar activated mature B-cell that is secreting immunoglobulin, typified by being CD27-positive, CD38-positive, CD138-negative.	7	9.80369	0.130159	9.81785	9.17425	9.60768	10.0426	10.2381
peripheral blood CD4 stem cell memory T-cell > CD4 stem cell memory T-cell > CD4 memory T-cell > CD4 T-cell > T-cell > T-cell lineage > lymphocyte > lymphoid leukocyte > leukocyte > hematopoietic and immune system cell > Cell type	peripheral blood CD4 stem cell memory T-cell		6	9.88512	0.0996083	9.81766	9.60877	9.72431	10.1058	10.2365
peripheral blood CD4 effector memory T-cell > CD4 effector memory T-cell > CD4 memory T-cell > CD4 T-cell > T-cell > T-cell lineage > lymphocyte > lymphoid leukocyte > leukocyte > hematopoietic and immune system cell > Cell type	peripheral blood CD4 effector memory T-cell		36	9.52535	0.108594	9.78247	9.1902	9.38595	9.90662	10.3519
sputum > respiratory system > Tissue	sputum		235	9.78266	0.0184945	9.76823	9.10813	9.60548	9.97183	10.4774
cerebral cortex oligodendrocyte progenitor cell > telencephalon oligodendrocyte progenitor cell > forebrain oligodendrocyte progenitor cell > brain oligodendrocyte progenitor cell > oligodendrocyte progenitor cell > glia cell > central nervous system cell > nervous system cell > Cell type	cerebral cortex oligodendrocyte progenitor cell		3	9.60112	0.262488	9.72852	9.09637	9.09637	9.97848	9.97848
orbital adipose tissue > adipose tissue (fat) > connective tissue > Tissue	orbital adipose tissue		97	9.71569	0.051126	9.72618	8.6858	9.37439	9.97177	10.7198
peripheral blood CD8 central memory T-cell > CD8 central memory T-cell > CD8 memory T-cell > CD8 T-cell > T-cell > T-cell lineage > lymphocyte > lymphoid leukocyte > leukocyte > hematopoietic and immune system cell > Cell type	peripheral blood CD8 central memory T-cell		28	9.63491	0.112771	9.70719	8.39669	9.43396	10.1411	10.4691
peripheral blood CD8 effector memory T-cell > CD8 effector memory T-cell > CD8 memory T-cell > CD8 T-cell > T-cell > T-cell lineage > lymphocyte > lymphoid leukocyte > leukocyte > hematopoietic and immune system cell > Cell type	peripheral blood CD8 effector memory T-cell		27	9.54152	0.0917203	9.70601	8.65213	9.30838	9.81873	10.2418
lacrimal gland > lacrimal apparatus > eye > sensory organ system > Tissue	lacrimal gland		70	9.59455	0.0470227	9.63131	8.71019	9.35032	9.81213	10.4091
peripheral blood CD4 central memory T-cell > CD4 central memory T-cell > CD4 memory T-cell > CD4 T-cell > T-cell > T-cell lineage > lymphocyte > lymphoid leukocyte > leukocyte > hematopoietic and immune system cell > Cell type	peripheral blood CD4 central memory T-cell		39	9.40882	0.11663	9.61018	7.92606	9.16098	9.99209	10.2013
tumor derived T-cell (unspecified) > T-cell (unspecified) > T-cell > T-cell lineage > lymphocyte > lymphoid leukocyte > leukocyte > hematopoietic and immune system cell > Cell type	tumor derived T-cell (unspecified)		10	9.63389	0.0913735	9.59394	9.13712	9.43039	9.92117	9.99903
breast (mammary gland) cell > trunk cell > other body part cell > Cell type	breast (mammary gland) cell		40	9.6029	0.049189	9.57853	8.8903	9.38933	9.83958	10.3067
bronchial (primary, main stem) epithelium cell > bronchial (primary, main stem) mucosa cell > bronchus (primary, main stem) cell > large airway cell > bronchoalveolar system cell > lung cell > respiratory system cell > Cell type	bronchial (primary, main stem) epithelium cell	----	760	9.39958	0.0534671	9.55146	7.03903	8.0588	9.8747	12.4967
vascular endothelium cell > blood vessel cell > vascular system cell > cardiovascular system cell > circulatory system cell > Cell type	vascular endothelium cell		89	9.62774	0.0391004	9.54928	8.84602	9.3758	9.84128	10.5247
peripheral blood CD8 memory T-cell (unspecified) > CD8 memory T-cell (unspecified) > CD8 memory T-cell > CD8 T-cell > T-cell > T-cell lineage > lymphocyte > lymphoid leukocyte > leukocyte > hematopoietic and immune system cell > Cell type	peripheral blood CD8 memory T-cell (unspecified)		34	9.26217	0.143308	9.50038	7.86115	8.22896	9.85891	10.4321
peripheral blood CD8 naive T-cell > CD8 naive T-cell > CD8 T-cell > T-cell > T-cell lineage > lymphocyte > lymphoid leukocyte > leukocyte > hematopoietic and immune system cell > Cell type	peripheral blood CD8 naive T-cell		33	9.47342	0.0917822	9.49093	8.73261	9.28077	9.84848	10.34
bone marrow polymorphonuclear cell (PMN) > granulocyte (polymorphonuclear leukocyte) > myeloid leukocyte > leukocyte > hematopoietic and immune system cell > Cell type	bone marrow polymorphonuclear cell (PMN)		3	9.40066	0.0658148	9.42152	9.27768	9.27768	9.50279	9.50279
bone marrow megakaryocyte-erythroid (MEP) progenitor cell > bone marrow hematopoietic stem / progenitor cell > hematopoietic stem / progenitor cell > hematopoietic and immune system cell > Cell type	bone marrow megakaryocyte-erythroid (MEP) progenitor cell		2	9.37068	0.142079	9.37068	9.2286	9.2286	9.51276	9.51276
cerebral white matter microglia cell > telencephalon microglia cell > forebrain microglia cell > brain microglia cell > microglia cell > glia cell > central nervous system cell > nervous system cell > Cell type	cerebral white matter microglia cell		5	9.31002	0.0509889	9.36851	9.15469	9.224	9.38849	9.41439
Langerhans cell > conventional dendritic cell > dendritic cell > leukocyte > hematopoietic and immune system cell > Cell type	Langerhans cell	Synonym: Langerhans’ cell. A conventional dendritic cell typically expressing CD207 (langerin), principally found in the epidermis.	13	9.0583	0.239851	9.34851	7.84962	8.94448	9.68392	9.92701
cerebral white matter oligodendrocyte progenitor cell > telencephalon oligodendrocyte progenitor cell > forebrain oligodendrocyte progenitor cell > brain oligodendrocyte progenitor cell > oligodendrocyte progenitor cell > glia cell > central nervous system cell > nervous system cell > Cell type	cerebral white matter oligodendrocyte progenitor cell		4	9.32665	0.0276271	9.34025	9.34025	9.34025	9.37793	9.37793
bone marrow cell > skeletal system cell > musculoskeletal system cell > Cell type	bone marrow cell		2	9.30283	0.32529	9.30283	8.97754	8.97754	9.62812	9.62812
bronchus (primary, main stem) > large airway > bronchoalveolar system > lung > respiratory system > Tissue	bronchus (primary, main stem)		6	9.25382	0.0520564	9.25385	9.10646	9.13455	9.37473	9.39947
orthochromatophilic normoblast (late erythroblast) > erythroblast > myeloid cell > hematopoietic and immune system cell > Cell type	orthochromatophilic normoblast (late erythroblast)		4	9.26054	0.099832	9.25163	9.04554	9.15413	9.49335	9.49335
vastus lateralis slow-twitch muscle fiber > vastus lateralis muscle > quadriceps femoris muscle > thigh muscle > muscle of lower limb > skeletal muscle > musculoskeletal system > Tissue	vastus lateralis slow-twitch muscle fiber		37	9.24635	0.037071	9.23752	8.72843	9.07117	9.42004	9.70148
blood outgrowth endothelium cell > vascular system cell > cardiovascular system cell > circulatory system cell > Cell type	blood outgrowth endothelium cell		15	9.19181	0.0451423	9.20609	8.95213	9.05061	9.30861	9.56306
band cell > myeloid leukocyte > leukocyte > hematopoietic and immune system cell > Cell type	band cell		4	9.17744	0.154444	9.20499	8.81224	9.03886	9.48752	9.48752
spinal cord neuron (unspecified) > spinal cord neuron > neuron > central nervous system cell > nervous system cell > Cell type	spinal cord neuron (unspecified)		11	9.22877	0.0544161	9.18433	8.87661	9.14034	9.42429	9.5021
bone marrow granulocyte-monocyte progenitor (GMP) cell > bone marrow hematopoietic stem / progenitor cell > hematopoietic stem / progenitor cell > hematopoietic and immune system cell > Cell type	bone marrow granulocyte-monocyte progenitor (GMP) cell	Synonym: bone marrow granulocyte-macrophage progenitor cell	5	9.27109	0.204339	9.16744	8.77703	8.99013	9.47033	9.95051
reconstructed epidermal model > Organotypic / 3D culture	reconstructed epidermal model	A three-dimensional reconstructed epidermis model.	12	9.13946	0.0600527	9.16557	8.88301	9.08023	9.22523	9.37006
vastus lateralis fast-twitch muscle fiber > vastus lateralis muscle > quadriceps femoris muscle > thigh muscle > muscle of lower limb > skeletal muscle > musculoskeletal system > Tissue	vastus lateralis fast-twitch muscle fiber		33	9.16114	0.0340303	9.14507	8.81695	9.04816	9.26238	9.55545
liver-infiltrating lymphocyte > lymphocyte > lymphoid leukocyte > leukocyte > hematopoietic and immune system cell > Cell type	liver-infiltrating lymphocyte		19	9.1137	0.0996309	9.12521	8.35231	8.88188	9.27118	9.49659
rectosigmoid colonic mucosa > rectosigmoid colon > colon > colorectum > large intestine > intestine > gastrointestinal tract > alimentary system > Tissue	rectosigmoid colonic mucosa		39	9.05006	0.0602213	9.12479	8.19825	8.84937	9.32838	9.5391
bone marrow endothelium progenitor cell > bone marrow endothelium cell > blood vessel endothelium cell > vascular endothelium cell > blood vessel cell > vascular system cell > cardiovascular system cell > circulatory system cell > Cell type	bone marrow endothelium progenitor cell		21	9.08658	0.0274888	9.11205	8.81948	9.0124	9.20166	9.24403
internal (medial) globus pallidus > dorsal pallidum > globus pallidus > corpus striatum > basal ganglia > cerebral hemisphere > telencephalon (cerebrum) > forebrain (prosencephalon) > brain (encephalon) > central nervous system (CNS) > nervous system > Tissue	internal (medial) globus pallidus		18	9.08653	0.0494867	9.10987	8.71119	8.94243	9.18666	9.28524
plasmablast > antibody-secreting cell > B-cell lineage > lymphocyte > lymphoid leukocyte > leukocyte > hematopoietic and immune system cell > Cell type	plasmablast	An activated mature (naive or memory) B-cell that is secreting immunoglobulin, typified by being CD27-positive, CD38-positive, CD138-negative.	5	9.10503	0.0676233	9.10847	8.91949	9.01992	9.15472	9.32254
lung artery endothelium cell > artery endothelium cell > vascular endothelium cell > blood vessel cell > vascular system cell > cardiovascular system cell > circulatory system cell > Cell type	lung artery endothelium cell		27	8.67025	0.130782	9.09966	7.62205	7.94626	9.2056	9.52366
monocyte derived macrophage > macrophage > myeloid leukocyte > leukocyte > hematopoietic and immune system cell > Cell type	monocyte derived macrophage		226	8.98537	0.0450504	9.09704	7.55082	8.35213	9.50809	10.4216
cuboidal alveolar type 2 cell (AT2) > pneumocyte > alveolar epithelium cell > alveolar cell > alveolar sac cell > bronchoalveolar system cell > lung cell > respiratory system cell > Cell type	cuboidal alveolar type 2 cell (AT2)		6	9.07794	0.118676	9.09111	9.00464	9.00464	9.25491	9.44274
metamyelocyte > myeloid leukocyte > leukocyte > hematopoietic and immune system cell > Cell type	metamyelocyte		3	9.16569	0.200498	9.09032	8.8623	8.8623	9.54446	9.54446
nasopharynx (epipharynx) > pharynx > respiratory system > Tissue	nasopharynx (epipharynx)		6	9.31874	0.355079	9.06811	8.53935	8.84621	9.40667	9.40667
trachea > respiratory system > Tissue	trachea		8	9.23539	0.143372	9.06694	8.87695	9.01661	9.77113	9.9693
tonsillar CD8 resting T-cell (unspecified) > tonsillar CD8 T-cell (unspecified) > CD8 T-cell (unspecified) > CD8 T-cell > T-cell > T-cell lineage > lymphocyte > lymphoid leukocyte > leukocyte > hematopoietic and immune system cell > Cell type	tonsillar CD8 resting T-cell (unspecified)		5	9.00306	0.0957173	9.05794	8.65671	8.95495	9.16053	9.18515
quadriceps femoris muscle > thigh muscle > muscle of lower limb > skeletal muscle > musculoskeletal system > Tissue	quadriceps femoris muscle		66	8.80798	0.0718444	9.04977	7.6851	8.28924	9.26379	9.82349
plasma cell > antibody-secreting cell > B-cell lineage > lymphocyte > lymphoid leukocyte > leukocyte > hematopoietic and immune system cell > Cell type	plasma cell	A terminally differentiated, post-mitotic, antibody secreting cell of the B-cell lineage typically described as CD138-positive, surface immunoglobulin-negative, and MHC Class II-negative. Plasma cells are oval or round with extensive rough endoplasmic reticulum, a well-developed Golgi apparatus, and a round nucleus having a characteristic cartwheel heterochromatin pattern and are devoted to produ…	8	9.12748	0.103203	9.04739	8.78529	8.93487	9.31011	9.70129
myelocyte > myeloid leukocyte > leukocyte > hematopoietic and immune system cell > Cell type	myelocyte		2	9.03778	0.135468	9.03778	8.90232	8.90232	9.17325	9.17325
fetal oligodendrocyte progenitor cell > fetal brain cell > fetal cell > gestational structure cell > Cell type	fetal oligodendrocyte progenitor cell		10	9.04699	0.0549533	9.0002	8.80645	8.96041	9.15694	9.37916
rectum > colorectum > large intestine > intestine > gastrointestinal tract > alimentary system > Tissue	rectum		231	8.96596	0.0243168	8.99452	8.12939	8.73921	9.18975	9.76799
proerythroblast > erythroblast > myeloid cell > hematopoietic and immune system cell > Cell type	proerythroblast		4	8.96841	0.0294871	8.97037	8.91292	8.92196	9.01998	9.01998
peripheral blood CD4 helper T-cell (unspecified) > CD4 helper T-cell (unspecified) > CD4 helper T-cell > CD4 T-cell > T-cell > T-cell lineage > lymphocyte > lymphoid leukocyte > leukocyte > hematopoietic and immune system cell > Cell type	peripheral blood CD4 helper T-cell (unspecified)		42	9.01841	0.0329345	8.96317	8.68569	8.89342	9.09887	9.30399
bone marrow common myeloid progenitor (CMP) cell > bone marrow hematopoietic stem / progenitor cell > hematopoietic stem / progenitor cell > hematopoietic and immune system cell > Cell type	bone marrow common myeloid progenitor (CMP) cell		3	9.11211	0.252025	8.95344	8.77712	8.77712	9.60578	9.60578
polychromatophilic normoblast (intermediate erythroblast) > erythroblast > myeloid cell > hematopoietic and immune system cell > Cell type	polychromatophilic normoblast (intermediate erythroblast)		4	8.98314	0.0673328	8.94674	8.86629	8.91412	9.1728	9.1728
tonsillar T-cell (unspecified) > T-cell (unspecified) > T-cell > T-cell lineage > lymphocyte > lymphoid leukocyte > leukocyte > hematopoietic and immune system cell > Cell type	tonsillar T-cell (unspecified)		8	8.77102	0.200537	8.92877	7.97447	8.45611	9.20447	9.48105
peripheral blood anergic B-cell > anergic B-cell > B-cell > B-cell lineage > lymphocyte > lymphoid leukocyte > leukocyte > hematopoietic and immune system cell > Cell type	peripheral blood anergic B-cell	A B-cell that does not proliferate upon BCR signaling isolated from peripheral blood.	5	8.77492	0.103187	8.92416	8.45738	8.59965	8.93914	8.95425
peripheral blood NK T-cell (unspecified) > NK T-cell (unspecified) > NK T-cell > T-cell > T-cell lineage > lymphocyte > lymphoid leukocyte > leukocyte > hematopoietic and immune system cell > Cell type	peripheral blood NK T-cell (unspecified)	Synonym: Natural killer T-cell from peripheral blood, not further specified.	18	8.9545	0.0591248	8.92235	8.54141	8.73813	9.16857	9.42585
tongue squamous epithelium cell > tongue epithelium cell > tongue mucosa cell > tongue cell > mouth (oral cavity) cell > gastrointestinal tract cell > alimentary system cell > Cell type	tongue squamous epithelium cell		12	8.97366	0.0439821	8.91318	8.76888	8.88862	9.08497	9.23833
bone marrow erythroblast > erythroblast > myeloid cell > hematopoietic and immune system cell > Cell type	bone marrow erythroblast		3	8.91353	0.206747	8.9092	8.55762	8.55762	9.27377	9.27377
blood colony-forming unit-erythroid (CFU-E) > blood erythroid progenitor cell > blood hematopoietic stem / progenitor cell > hematopoietic stem / progenitor cell > hematopoietic and immune system cell > Cell type	blood colony-forming unit-erythroid (CFU-E)		3	8.9052	0.0122225	8.90728	8.88307	8.88307	8.92526	8.92526
thrombus derived leukocyte > leukocyte > hematopoietic and immune system cell > Cell type	thrombus derived leukocyte		4	8.95668	0.187504	8.89253	8.57376	8.83924	9.46791	9.46791
bone marrow hematopoietic stem cell > bone marrow hematopoietic stem / progenitor cell > hematopoietic stem / progenitor cell > hematopoietic and immune system cell > Cell type	bone marrow hematopoietic stem cell		6	8.9636	0.200134	8.8907	8.4694	8.53761	9.40212	9.59105
platelet (thrombocyte) > myeloid cell > hematopoietic and immune system cell > Cell type	platelet (thrombocyte)		28	8.88261	0.0518043	8.8847	8.4335	8.72768	9.02006	9.25236
gastrocnemius muscle > leg muscle > muscle of lower limb > skeletal muscle > musculoskeletal system > Tissue	gastrocnemius muscle		3	8.69695	0.19121	8.86771	8.31524	8.31524	8.90791	8.90791
epidermal melanocyte > epidermis cell > skin cell > integumentary system cell > Cell type	epidermal melanocyte		3	8.80811	0.0809084	8.86487	8.6485	8.6485	8.91097	8.91097
bone marrow myeloid cell (unspecified) > myeloid cell (unspecified) > myeloid cell > hematopoietic and immune system cell > Cell type	bone marrow myeloid cell (unspecified)		3	8.79163	0.0944012	8.85957	8.60511	8.60511	8.91022	8.91022
natural killer cell > group 1 innate lymphoid cell > innate lymphoid cell > lymphoid leukocyte > leukocyte > hematopoietic and immune system cell > Cell type	natural killer cell	A lymphocyte that can spontaneously kill a variety of target cells without prior antigenic activation via germline encoded activation receptors and also regulate immune responses via cytokine release and direct contact with other cells.	7	8.84608	0.0920694	8.841	8.45014	8.73203	9.01187	9.2292
late promyelocyte > promyelocyte > myeloid leukocyte > leukocyte > hematopoietic and immune system cell > Cell type	late promyelocyte		3	8.87006	0.0685209	8.83248	8.77472	8.77472	9.00298	9.00298
osteoclast precursor > bone cell > bone tissue cell > skeletal system cell > musculoskeletal system cell > Cell type	osteoclast precursor		4	8.80452	0.0861901	8.79383	8.605	8.78159	9.02544	9.02544
tonsillar natural killer cell > natural killer cell > group 1 innate lymphoid cell > innate lymphoid cell > lymphoid leukocyte > leukocyte > hematopoietic and immune system cell > Cell type	tonsillar natural killer cell		5	8.68943	0.0978784	8.7827	8.41181	8.50779	8.81829	8.92656
bone marrow plasma cell > plasma cell > antibody-secreting cell > B-cell lineage > lymphocyte > lymphoid leukocyte > leukocyte > hematopoietic and immune system cell > Cell type	bone marrow plasma cell	A terminally differentiated, post-mitotic, antibody secreting cell of the B-cell lineage typically described as CD138-positive, surface immunoglobulin-negative, and MHC Class II-negative isolated from the bone marrow.	32	9.07552	0.151617	8.78112	8.17617	8.44054	10.2537	10.7151
early promyelocyte > promyelocyte > myeloid leukocyte > leukocyte > hematopoietic and immune system cell > Cell type	early promyelocyte		3	8.75498	0.0636857	8.77959	8.63445	8.63445	8.85091	8.85091
peripheral blood CD4 regulatory T-cell (unspecified) > CD4 regulatory T-cell (unspecified) > CD4 regulatory T-cell > CD4 T-cell > T-cell > T-cell lineage > lymphocyte > lymphoid leukocyte > leukocyte > hematopoietic and immune system cell > Cell type	peripheral blood CD4 regulatory T-cell (unspecified)		62	8.7428	0.0467683	8.76601	8.17896	8.37608	9.02195	9.43154
hepatic myofibroblast > hepatic mucosa cell > liver cell > liver and biliary system cell > alimentary system cell > Cell type	hepatic myofibroblast		4	8.76355	0.0191778	8.74697	8.73985	8.74106	8.8204	8.8204
peripheral blood naive B-cell > naive B-cell > mature B-cell > B-cell > B-cell lineage > lymphocyte > lymphoid leukocyte > leukocyte > hematopoietic and immune system cell > Cell type	peripheral blood naive B-cell	Synonym: peripheral blood mature naive B-cell. A naive B-cell is a mature B-cell that is typically described as surface IgD-positive, surface IgM-positive, CD20-positive, CD27-negative and that has not yet been activated by antigen in the periphery.	18	8.7039	0.106862	8.73514	7.60629	8.38128	9.00904	9.38137
lymphocyte > lymphoid leukocyte > leukocyte > hematopoietic and immune system cell > Cell type	lymphocyte		35	8.41137	0.0962254	8.73257	7.4446	7.80607	8.87943	9.09885
peripheral blood natural killer cell > natural killer cell > group 1 innate lymphoid cell > innate lymphoid cell > lymphoid leukocyte > leukocyte > hematopoietic and immune system cell > Cell type	peripheral blood natural killer cell		22	8.57099	0.0928127	8.70473	7.79481	8.11998	8.89172	9.19128
vascular smooth muscle cell > blood vessel cell > vascular system cell > cardiovascular system cell > circulatory system cell > Cell type	vascular smooth muscle cell		10	8.72603	0.0705399	8.69258	8.39215	8.54905	8.92627	9.09228
cerebrospinal fluid cell > central nervous system cell > nervous system cell > Cell type	cerebrospinal fluid cell		86	8.68313	0.0532113	8.69152	7.89797	8.23836	9.09117	9.91885
tonsillar CD8 T-cell (unspecified) > CD8 T-cell (unspecified) > CD8 T-cell > T-cell > T-cell lineage > lymphocyte > lymphoid leukocyte > leukocyte > hematopoietic and immune system cell > Cell type	tonsillar CD8 T-cell (unspecified)		7	8.69119	0.0445286	8.68843	8.56449	8.58523	8.79168	8.89233
dermal papilla > dermis > skin > integumentary system > Tissue	dermal papilla		3	8.91014	0.281949	8.6838	8.57603	8.57603	9.4706	9.4706
biceps brachii > arm muscle > muscle of upper limb > skeletal muscle > musculoskeletal system > Tissue	biceps brachii		77	8.66398	0.0211965	8.67476	8.29673	8.58222	8.79902	9.04051
pancreatic islet (islet of Langerhans) > pancreas > alimentary system > Tissue	pancreatic islet (islet of Langerhans)		292	8.6381	0.0222391	8.66507	7.71493	8.33624	8.91106	9.48623
tonsillar CD4 regulatory T-cell (unspecified) > CD4 regulatory T-cell (unspecified) > CD4 regulatory T-cell > CD4 T-cell > T-cell > T-cell lineage > lymphocyte > lymphoid leukocyte > leukocyte > hematopoietic and immune system cell > Cell type	tonsillar CD4 regulatory T-cell (unspecified)		5	8.75778	0.106052	8.66274	8.6565	8.6565	8.6908	8.6908
tonsillar CD4 resting T-cell (unspecified) > tonsillar CD4 T-cell (unspecified) > CD4 T-cell (unspecified) > CD4 T-cell > T-cell > T-cell lineage > lymphocyte > lymphoid leukocyte > leukocyte > hematopoietic and immune system cell > Cell type	tonsillar CD4 resting T-cell (unspecified)		5	8.7483	0.0813899	8.64634	8.59268	8.60984	8.93443	8.9582
tumor derived CD8 T-cell (unspecified) > CD8 T-cell (unspecified) > CD8 T-cell > T-cell > T-cell lineage > lymphocyte > lymphoid leukocyte > leukocyte > hematopoietic and immune system cell > Cell type	tumor derived CD8 T-cell (unspecified)		8	8.63036	0.032309	8.64568	8.47277	8.5719	8.70881	8.74083
extensor digitorum longus muscle > leg muscle > muscle of lower limb > skeletal muscle > musculoskeletal system > Tissue	extensor digitorum longus muscle		2	8.63925	0.0281844	8.63925	8.61106	8.61106	8.66743	8.66743
peripheral blood memory B-cell (unspecified) > memory B-cell > mature B-cell > B-cell > B-cell lineage > lymphocyte > lymphoid leukocyte > leukocyte > hematopoietic and immune system cell > Cell type	peripheral blood memory B-cell (unspecified)	A peripheral blood memory B-cell is a mature B-cell that is long-lived, readily activated upon re-encounter of its antigenic determinant, and has been selected for expression of higher affinity immunoglobulin. This cell type is typically described as CD19-positive, CD20-positive, MHC Class II-positive, and CD138-negative. Along with plasma cells, memory B/cells are sometimes referred to as ‘post-…	28	8.60045	0.0832241	8.62026	7.79357	8.33405	8.9708	9.33336
nasopharyngeal (epipharyngeal) epithelium > nasopharyngeal (epipharyngeal) mucosa > nasopharynx (epipharynx) > pharynx > respiratory system > Tissue	nasopharyngeal (epipharyngeal) epithelium		4	9.37349	1.08117	8.61953	7.77617	8.02945	12.4787	12.4787
heart muscle (myocardium, cardiac muscle) > heart > cardiovascular system > circulatory system > Tissue	heart muscle (myocardium, cardiac muscle)		68	8.61661	0.0309773	8.6135	7.93617	8.42379	8.81458	9.27335
basal epidermis cell > epidermis cell > skin cell > integumentary system cell > Cell type	basal epidermis cell		3	8.59283	0.0127561	8.60144	8.56773	8.56773	8.60933	8.60933
memory B-cell > mature B-cell > B-cell > B-cell lineage > lymphocyte > lymphoid leukocyte > leukocyte > hematopoietic and immune system cell > Cell type	memory B-cell	A memory B-cell is a mature B-cell that is long-lived, readily activated upon re-encounter of its antigenic determinant, and has been selected for expression of higher affinity immunoglobulin. This cell type is typically described as CD19-positive, CD20-positive, MHC Class II-positive, and CD138-negative. It has also been described as B220-positive, IgM-kappa-positive and AA4-negative. Along with…	3	8.59758	0.0185011	8.60092	8.564	8.564	8.62783	8.62783
germinal center B-cell > mature B-cell > B-cell > B-cell lineage > lymphocyte > lymphoid leukocyte > leukocyte > hematopoietic and immune system cell > Cell type	germinal center B-cell	Synonym: GC B-lymphocyte. A rapidly cycling mature B-cell that is involved in T-dependent immune responses and located typically in the germinal centers of lymph nodes or the spleen. This cell type typically expresses Ly77 after activation.	3	8.58347	0.0606578	8.59939	8.47135	8.47135	8.67966	8.67966
tumor derived oligodendrocyte progenitor cell > oligodendrocyte progenitor cell > glia cell > central nervous system cell > nervous system cell > Cell type	tumor derived oligodendrocyte progenitor cell		20	8.6315	0.113735	8.59788	7.76924	8.22497	9.09471	9.61283
cardiac microvessel endothelium cell > microvessel endothelium cell > vascular endothelium cell > blood vessel cell > vascular system cell > cardiovascular system cell > circulatory system cell > Cell type	cardiac microvessel endothelium cell		8	8.67517	0.0989409	8.59136	8.46569	8.49717	8.78931	8.78931
pons > metencephalon > hindbrain (rhombencephalon) > brain (encephalon) > central nervous system (CNS) > nervous system > Tissue	pons		2	8.59007	0.353148	8.59007	8.23692	8.23692	8.94322	8.94322
middle temporal gyrus pyramidal neuron > middle temporal gyrus neuron > temporal lobe neuron (unspecified) > temporal lobe neuron > cerebral cortex neuron (unspecified) > cerebral cortex neuron > telencephalon neuron (unspecified) > telencephalon neuron > forebrain neuron > brain neuron > neuron > central nervous system cell > nervous system cell > Cell type	middle temporal gyrus pyramidal neuron		33	8.68973	0.0519095	8.58669	8.29935	8.46029	8.88609	9.28448
skin > integumentary system > Tissue	skin		2661	8.55335	0.010922	8.57255	7.15957	8.12964	8.9907	10.1327
tonsillar CD8 activated T-cell (unspecified) > tonsillar CD8 T-cell (unspecified) > CD8 T-cell (unspecified) > CD8 T-cell > T-cell > T-cell lineage > lymphocyte > lymphoid leukocyte > leukocyte > hematopoietic and immune system cell > Cell type	tonsillar CD8 activated T-cell (unspecified)		11	8.61082	0.0749567	8.56815	8.22057	8.49245	8.70428	9.01801
entorhinal cortex large stellate neuron > retrohippocampal cortex neuron (unspecified) > retrohippocampal cortex neuron > cerebral cortex neuron (unspecified) > cerebral cortex neuron > telencephalon neuron (unspecified) > telencephalon neuron > forebrain neuron > brain neuron > neuron > central nervous system cell > nervous system cell > Cell type	entorhinal cortex large stellate neuron		28	8.54399	0.0271932	8.55788	8.25616	8.44087	8.63005	8.90057
tonsillar CD4 activated T-cell (unspecified) > tonsillar CD4 T-cell (unspecified) > CD4 T-cell (unspecified) > CD4 T-cell > T-cell > T-cell lineage > lymphocyte > lymphoid leukocyte > leukocyte > hematopoietic and immune system cell > Cell type	tonsillar CD4 activated T-cell (unspecified)		5	8.55737	0.0280214	8.55398	8.48732	8.51144	8.5892	8.6449
hippocampus pyramidal neuron > hippocampus neuron > temporal lobe neuron (unspecified) > temporal lobe neuron > cerebral cortex neuron (unspecified) > cerebral cortex neuron > telencephalon neuron (unspecified) > telencephalon neuron > forebrain neuron > brain neuron > neuron > central nervous system cell > nervous system cell > Cell type	hippocampus pyramidal neuron		28	8.5727	0.0339174	8.55385	8.24284	8.43983	8.69234	8.9855
cerebral hemisphere > telencephalon (cerebrum) > forebrain (prosencephalon) > brain (encephalon) > central nervous system (CNS) > nervous system > Tissue	cerebral hemisphere		1	8.55271	NaN	8.55271	8.55271	8.55271	8.55271	8.55271
subcutaneous adipose tissue (SAT) > adipose tissue (fat) > connective tissue > Tissue	subcutaneous adipose tissue (SAT)		401	8.5643	0.00748557	8.55182	8.23716	8.47561	8.64494	8.89321
growth plate > cartilage > skeletal system (except bone marrow) > musculoskeletal system > Tissue	growth plate		9	8.55846	0.0229523	8.55071	8.49909	8.53792	8.59671	8.67955
tibialis anterior muscle > tibialis muscle > leg muscle > muscle of lower limb > skeletal muscle > musculoskeletal system > Tissue	tibialis anterior muscle		2	8.54893	0.130828	8.54893	8.41811	8.41811	8.67976	8.67976
posterior cingulate gyrus pyramidal neuron > posterior cingulate gyrus neuron > cingulate cortex neuron (unspecified) > cingulate cortex neuron > cerebral cortex neuron (unspecified) > cerebral cortex neuron > telencephalon neuron (unspecified) > telencephalon neuron > forebrain neuron > brain neuron > neuron > central nervous system cell > nervous system cell > Cell type	posterior cingulate gyrus pyramidal neuron		27	8.61462	0.0484684	8.54234	8.20687	8.45623	8.71053	9.05577
naive B-cell > mature B-cell > B-cell > B-cell lineage > lymphocyte > lymphoid leukocyte > leukocyte > hematopoietic and immune system cell > Cell type	naive B-cell	Synonym: mature naive B-cell. A naive B-cell is a mature B-cell that is typically described as surface IgD-positive, surface IgM-positive, CD20-positive, CD27-negative and that has not yet been activated by antigen in the periphery.	3	8.533	0.0192452	8.53434	8.49901	8.49901	8.56564	8.56564
oocyte > female germ cell > female reproductive system cell > reproductive system cell > Cell type	oocyte		3	8.53333	0	8.53333	8.53333	8.53333	8.53333	8.53333
superior vestibular nucleus > vestibular nucleus > pontine tegmentum > pons > metencephalon > hindbrain (rhombencephalon) > brain (encephalon) > central nervous system (CNS) > nervous system > Tissue	superior vestibular nucleus		14	8.51874	0.131026	8.52116	7.89579	8.12727	8.68773	9.3897
skeletal muscle > musculoskeletal system > Tissue	skeletal muscle		67	8.4767	0.035922	8.51534	7.8404	8.2279	8.69509	9.29634
bone marrow derived mesenchymal stem cell > bone marrow stromal cell > bone marrow cell > skeletal system cell > musculoskeletal system cell > Cell type	bone marrow derived mesenchymal stem cell		76	8.76419	0.0913088	8.51084	7.60103	8.15679	9.35696	10.6756
parotid gland > salivary gland > mouth (oral cavity) > gastrointestinal tract > alimentary system > Tissue	parotid gland		30	8.55591	0.039431	8.50848	8.05403	8.41578	8.76354	9.01039
pituitary gland (hypophysis) > endocrine system (except testis and ovary) > Tissue	pituitary gland (hypophysis)		21	8.69089	0.108793	8.50716	7.95117	8.40412	8.8019	9.29843
reticular dermis cell > dermis cell > skin cell > integumentary system cell > Cell type	reticular dermis cell		3	8.45582	0.0560562	8.50549	8.34394	8.34394	8.51802	8.51802
superior frontal gyrus pyramidal neuron > superior frontal gyrus neuron > frontal lobe neuron (unspecified) > frontal lobe neuron > cerebral cortex neuron (unspecified) > cerebral cortex neuron > telencephalon neuron (unspecified) > telencephalon neuron > forebrain neuron > brain neuron > neuron > central nervous system cell > nervous system cell > Cell type	superior frontal gyrus pyramidal neuron		36	8.55635	0.0297991	8.50396	8.31111	8.43338	8.72615	9.10821
tonsillar CD4 T-cell (unspecified) > CD4 T-cell (unspecified) > CD4 T-cell > T-cell > T-cell lineage > lymphocyte > lymphoid leukocyte > leukocyte > hematopoietic and immune system cell > Cell type	tonsillar CD4 T-cell (unspecified)		7	8.49719	0.0505456	8.50327	8.32764	8.3975	8.56598	8.72894
urinary bladder stromal fibromuscular cell > urinary bladder stroma cell > urinary bladder cell > urinary system cell > Cell type	urinary bladder stromal fibromuscular cell		2	8.49816	0.0718904	8.49816	8.42626	8.42626	8.57005	8.57005
blood > circulatory system > Tissue	blood		6043	8.58257	0.00829858	8.49601	6.96313	8.10926	8.95184	10.2113
CD4 regulatory T-cell (unspecified) > CD4 regulatory T-cell > CD4 T-cell > T-cell > T-cell lineage > lymphocyte > lymphoid leukocyte > leukocyte > hematopoietic and immune system cell > Cell type	CD4 regulatory T-cell (unspecified)		30	8.62077	0.0797296	8.49396	8.02181	8.28656	8.76002	9.32411
CD8 activated T-cell (unspecified) > CD8 T-cell (unspecified) > CD8 T-cell > T-cell > T-cell lineage > lymphocyte > lymphoid leukocyte > leukocyte > hematopoietic and immune system cell > Cell type	CD8 activated T-cell (unspecified)		1	8.49309	NaN	8.49309	8.49309	8.49309	8.49309	8.49309
triceps muscle > arm muscle > muscle of upper limb > skeletal muscle > musculoskeletal system > Tissue	triceps muscle		1	8.48559	NaN	8.48559	8.48559	8.48559	8.48559	8.48559
peripheral blood leukocyte > leukocyte > hematopoietic and immune system cell > Cell type	peripheral blood leukocyte		216	8.52568	0.0251232	8.48464	7.67228	8.24992	8.78477	9.45601
large airway basal cell > large airway epithelium cell > large airway mucosa cell > large airway cell > bronchoalveolar system cell > lung cell > respiratory system cell > Cell type	large airway basal cell		5	8.50813	0.0909349	8.47905	8.47618	8.47618	8.55417	8.55417
cardiomyocyte (heart muscle cell) > heart cell > cardiovascular system cell > circulatory system cell > Cell type	cardiomyocyte (heart muscle cell)		7	8.50599	0.0770415	8.47464	8.29407	8.34629	8.60028	8.8976
uterine endometrium > uterus > female reproductive system > reproductive system > Tissue	uterine endometrium		342	8.50932	0.0226412	8.47163	7.64789	8.23821	8.68773	9.33541
dermal papilla cell > dermis cell > skin cell > integumentary system cell > Cell type	dermal papilla cell		12	8.47851	0.0466428	8.47071	8.21815	8.39352	8.57539	8.83744
corpus callosum > cerebral white matter > cerebral hemisphere > telencephalon (cerebrum) > forebrain (prosencephalon) > brain (encephalon) > central nervous system (CNS) > nervous system > Tissue	corpus callosum		18	8.68107	0.182052	8.4697	7.79207	8.11061	9.04026	10.396
tonsillar B-cell (unspecified) > B-cell (unspecified) > B-cell > B-cell lineage > lymphocyte > lymphoid leukocyte > leukocyte > hematopoietic and immune system cell > Cell type	tonsillar B-cell (unspecified)		13	8.38618	0.0705115	8.46842	7.94034	8.14512	8.59824	8.68524
deltoid muscle > shoulder muscle > muscle of upper limb > skeletal muscle > musculoskeletal system > Tissue	deltoid muscle		31	8.42812	0.0513902	8.46781	7.77268	8.17717	8.63296	8.89709
primary visual cortex pyramidal neuron > primary visual cortex neuron > visual cortex neuron (unspecified) > visual cortex neuron > occipital lobe neuron (unspecified) > occipital lobe neuron > cerebral cortex neuron (unspecified) > cerebral cortex neuron > telencephalon neuron (unspecified) > telencephalon neuron > forebrain neuron > brain neuron > neuron > central nervous system cell > nervous …	primary visual cortex pyramidal neuron		34	8.48918	0.0323068	8.46622	8.17837	8.37443	8.52137	8.68222
embryo > embryonic tissue / fluid > gestational structure > Tissue	embryo		18	8.42769	0.0528512	8.45815	8.09381	8.35443	8.57807	8.75886
peripheral blood neutrophil granulocyte > neutrophil granulocyte > granulocyte (polymorphonuclear leukocyte) > myeloid leukocyte > leukocyte > hematopoietic and immune system cell > Cell type	peripheral blood neutrophil granulocyte		157	8.61129	0.0430294	8.44456	7.86734	8.24446	8.77666	9.47974
peripheral blood CD4 T-large granular lymphocyte > CD4 T-large granular lymphocyte > CD4 T-cell > T-cell > T-cell lineage > lymphocyte > lymphoid leukocyte > leukocyte > hematopoietic and immune system cell > Cell type	peripheral blood CD4 T-large granular lymphocyte		11	8.48209	0.0423701	8.44427	8.33682	8.3692	8.61772	8.76891
urinary bladder > urinary system > Tissue	urinary bladder		4	8.37427	0.0951171	8.43218	8.41768	8.41768	8.53399	8.53399
nurse-like cell > macrophage > myeloid leukocyte > leukocyte > hematopoietic and immune system cell > Cell type	nurse-like cell	A leukemia-associated counterpart of tissue-associated macrophages, typically described as expressing high levels of CD68 and CD163.	10	8.39886	0.0452389	8.43042	8.15583	8.29076	8.45746	8.62983
duodenum > small intestine > intestine > gastrointestinal tract > alimentary system > Tissue	duodenum		37	8.39494	0.0384433	8.42811	7.96694	8.24346	8.59335	8.70158
suprabasal epidermis cell > epidermis cell > skin cell > integumentary system cell > Cell type	suprabasal epidermis cell		3	8.40171	0.0220408	8.42181	8.35768	8.35768	8.42564	8.42564
heart right atrial appendage > heart right atrium > heart atrium > heart muscle (myocardium, cardiac muscle) > heart > cardiovascular system > circulatory system > Tissue	heart right atrial appendage		25	8.46116	0.0453028	8.41519	7.97212	8.34541	8.62132	8.8479
vulva > female reproductive system > reproductive system > Tissue	vulva		27	8.39862	0.035344	8.40557	8.01212	8.26397	8.52927	8.68198
epidermal keratinocyte > epidermis cell > skin cell > integumentary system cell > Cell type	epidermal keratinocyte		83	8.36878	0.0238055	8.40535	7.92653	8.23726	8.49586	8.80109
peripheral blood CD8 cytotoxic T-cell (unspecified) > CD8 cytotoxic T-cell (unspecified) > CD8 cytotoxic T-cell > CD8 T-cell > T-cell > T-cell lineage > lymphocyte > lymphoid leukocyte > leukocyte > hematopoietic and immune system cell > Cell type	peripheral blood CD8 cytotoxic T-cell (unspecified)		5	8.43136	0.0987764	8.40229	8.22901	8.31814	8.40229	8.40229
astrocyte (unspecified) > astrocyte > glia cell > central nervous system cell > nervous system cell > Cell type	astrocyte (unspecified)		9	8.24331	0.121219	8.39951	7.61817	8.10292	8.48756	8.61842
heart right ventricle > heart ventricle > heart muscle (myocardium, cardiac muscle) > heart > cardiovascular system > circulatory system > Tissue	heart right ventricle		19	8.43981	0.0360945	8.39827	8.23778	8.3267	8.55271	8.81317
vermis > cerebellum > metencephalon > hindbrain (rhombencephalon) > brain (encephalon) > central nervous system (CNS) > nervous system > Tissue	vermis		1	8.39618	NaN	8.39618	8.39618	8.39618	8.39618	8.39618
fetal skeletal muscle > fetal muscle > fetus > fetal tissue / fluid > gestational structure > Tissue	fetal skeletal muscle		3	8.39611	0.110833	8.39322	8.2056	8.2056	8.5895	8.5895
heart left atrial appendage > heart left atrium > heart atrium > heart muscle (myocardium, cardiac muscle) > heart > cardiovascular system > circulatory system > Tissue	heart left atrial appendage		40	8.39807	0.0390588	8.38455	7.9663	8.17478	8.61721	8.83115
putamen > dorsal striatum > striatum > corpus striatum > basal ganglia > cerebral hemisphere > telencephalon (cerebrum) > forebrain (prosencephalon) > brain (encephalon) > central nervous system (CNS) > nervous system > Tissue	putamen		27	8.40345	0.0415822	8.38353	8.08108	8.21747	8.55647	8.97131
placenta > extraembryonic tissue / fluid > gestational structure > Tissue	placenta		43	8.24414	0.056912	8.38288	7.44029	7.93811	8.50383	8.7416
breast (mammary gland) epithelium cell > breast (mammary gland) cell > trunk cell > other body part cell > Cell type	breast (mammary gland) epithelium cell		88	8.91904	0.113335	8.37906	7.35913	8.09196	10.2455	10.7187
osteoblast like cell > bone cell > bone tissue cell > skeletal system cell > musculoskeletal system cell > Cell type	osteoblast like cell		21	8.32718	0.0367472	8.37487	8.10905	8.233	8.43429	8.65252
lateral thalamic nucleus > diencephalon > forebrain (prosencephalon) > brain (encephalon) > central nervous system (CNS) > nervous system > Tissue	lateral thalamic nucleus		4	8.40923	0.100604	8.3727	8.20511	8.36045	8.6864	8.6864
bronchial smooth muscle cell > large airway cell > bronchoalveolar system cell > lung cell > respiratory system cell > Cell type	bronchial smooth muscle cell	----	6	8.3782	0.0390761	8.371	8.2612	8.29315	8.47869	8.49418
uterine myometrium myocyte > uterine myometrium cell > uterus cell > female reproductive system cell > reproductive system cell > Cell type	uterine myometrium myocyte		12	8.37871	0.0326834	8.36378	8.2097	8.29884	8.50052	8.56632
pars reticulata > substantia nigra > midbrain (mesencephalon) > brain (encephalon) > central nervous system (CNS) > nervous system > Tissue	pars reticulata		7	8.30446	0.120978	8.35306	7.87725	8.08002	8.4065	8.88338
monocyte > myeloid leukocyte > leukocyte > hematopoietic and immune system cell > Cell type	monocyte		314	8.37795	0.0192849	8.35005	7.77591	8.2031	8.49205	8.86109
saphenous vein > vein > blood vessel > vascular system > cardiovascular system > circulatory system > Tissue	saphenous vein		6	8.25222	0.0791653	8.34404	7.96907	8.04778	8.40254	8.40582
conjunctival epithelium cell > conjunctival mucosa cell > conjunctiva cell > eye cell > sensory organ system cell > Cell type	conjunctival epithelium cell		3	8.31901	0.168456	8.34101	8.01686	8.01686	8.59917	8.59917
monocyte derived dendritic cell > dendritic cell > leukocyte > hematopoietic and immune system cell > Cell type	monocyte derived dendritic cell		160	8.42135	0.0472614	8.34023	7.39086	8.05007	8.57803	9.28794
chorion villus cell > chorion (chorionic membrane) cell > chorioamniotic membrane cell > extraembryonic cell > gestational structure cell > Cell type	chorion villus cell		12	8.32769	0.0568004	8.33781	7.99481	8.22376	8.49414	8.6453
gluteal subcutaneous adipose tissue (glutSAT) > subcutaneous adipose tissue (SAT) > adipose tissue (fat) > connective tissue > Tissue	gluteal subcutaneous adipose tissue (glutSAT)		69	8.36552	0.020397	8.33602	8.03463	8.23764	8.47901	8.74413
umbilical cord > extraembryonic tissue / fluid > gestational structure > Tissue	umbilical cord		53	8.34031	0.0273667	8.33423	7.93752	8.16912	8.43242	8.81458
vastus lateralis muscle > quadriceps femoris muscle > thigh muscle > muscle of lower limb > skeletal muscle > musculoskeletal system > Tissue	vastus lateralis muscle		1664	8.36225	0.00911403	8.33045	7.37243	8.10764	8.60025	9.32924
colonic epithelium cell (colonocyte) > colonic mucosa cell > colorectal mucosa cell > large intestinal mucosa cell > large intestine cell > intestine cell > gastrointestinal tract cell > alimentary system cell > Cell type	colonic epithelium cell (colonocyte)		40	8.63503	0.115043	8.32939	7.66327	8.07564	9.46465	10.0416
urinary bladder urothelium (epithelium) cell > urinary bladder cell > urinary system cell > Cell type	urinary bladder urothelium (epithelium) cell		12	8.37931	0.0454794	8.32384	8.19943	8.29251	8.41878	8.58003
accumbens nucleus > ventral striatum > striatum > corpus striatum > basal ganglia > cerebral hemisphere > telencephalon (cerebrum) > forebrain (prosencephalon) > brain (encephalon) > central nervous system (CNS) > nervous system > Tissue	accumbens nucleus		78	8.34852	0.0301108	8.32257	7.89978	8.13288	8.54655	8.99206
retina > eye > sensory organ system > Tissue	retina		36	8.33919	0.0212415	8.32122	8.1249	8.23898	8.44646	8.63001
scalp > head > other body part > Tissue	scalp		36	8.3404	0.0328371	8.31721	8.10538	8.19436	8.42572	8.58965
lung > respiratory system > Tissue	lung		489	8.52279	0.0338346	8.31633	7.30113	8.06431	8.76208	9.80431
vagina > female reproductive system > reproductive system > Tissue	vagina		8	8.30822	0.0479145	8.31412	8.12055	8.19402	8.42614	8.48752
peripheral blood CD8 effector memory RA T-cell > CD8 effector memory RA T-cell > CD8 memory T-cell > CD8 T-cell > T-cell > T-cell lineage > lymphocyte > lymphoid leukocyte > leukocyte > hematopoietic and immune system cell > Cell type	peripheral blood CD8 effector memory RA T-cell		4	8.33556	0.0694802	8.31112	8.21179	8.23491	8.50819	8.50819
bone marrow stromal cell > bone marrow cell > skeletal system cell > musculoskeletal system cell > Cell type	bone marrow stromal cell		16	8.27692	0.0474125	8.30313	7.84731	8.1822	8.41481	8.58935
ventral tegmental area > midbrain tegmentum > cerebral peduncle > midbrain (mesencephalon) > brain (encephalon) > central nervous system (CNS) > nervous system > Tissue	ventral tegmental area		16	8.27249	0.0498719	8.30225	7.95867	8.12184	8.41726	8.57781
tongue > mouth (oral cavity) > gastrointestinal tract > alimentary system > Tissue	tongue		19	8.2545	0.0634267	8.28997	7.74329	8.07419	8.40259	8.88719
bone marrow > hematopoietic and immune system > Tissue	bone marrow		153	8.3095	0.0136774	8.28526	7.88466	8.1876	8.42362	8.72339
ovarian stroma cell > ovary (female gonad) cell > female reproductive system cell > reproductive system cell > Cell type	ovarian stroma cell		8	8.21378	0.0531616	8.2822	8.20256	8.20256	8.31601	8.36497
pulmonary (lung) myofibroblast > pulmonary (lung) mucosa cell > lung cell > respiratory system cell > Cell type	pulmonary (lung) myofibroblast	----	48	8.31712	0.0382332	8.28129	7.86728	8.11317	8.44787	8.85524
CD4 resting T-cell (unspecified) > CD4 T-cell (unspecified) > CD4 T-cell > T-cell > T-cell lineage > lymphocyte > lymphoid leukocyte > leukocyte > hematopoietic and immune system cell > Cell type	CD4 resting T-cell (unspecified)		1	8.2784	NaN	8.2784	8.2784	8.2784	8.2784	8.2784
testicular lobules > testis (male gonad) > male reproductive system > reproductive system > Tissue	testicular lobules		45	9.07453	0.195305	8.27324	7.8212	8.1058	10.1932	11.9898
rectus abdominus muscle > abdominal muscle > muscle of torso > skeletal muscle > musculoskeletal system > Tissue	rectus abdominus muscle		102	8.3484	0.0275912	8.27317	7.72778	8.17463	8.50008	8.98644
peripheral blood CD8 T-cell (unspecified) > CD8 T-cell (unspecified) > CD8 T-cell > T-cell > T-cell lineage > lymphocyte > lymphoid leukocyte > leukocyte > hematopoietic and immune system cell > Cell type	peripheral blood CD8 T-cell (unspecified)		126	8.35778	0.0318484	8.26896	7.78542	8.15102	8.40506	8.71805
umbilical cord blood derived CD34 hematopoietic stem / progenitor cell > umbilical cord blood derived hematopoietic stem / progenitor cell > umbilical cord blood cell > umbilical cord cell > extraembryonic cell > gestational structure cell > Cell type	umbilical cord blood derived CD34 hematopoietic stem / progenitor cell		29	8.22305	0.0451932	8.26894	7.66775	8.04346	8.37756	8.70629
macrophage > myeloid leukocyte > leukocyte > hematopoietic and immune system cell > Cell type	macrophage		38	8.1234	0.0654706	8.26739	7.32328	7.93393	8.44886	8.66555
conjunctival epithelium cell (sp.) > conjunctival mucosa cell > conjunctiva cell > eye cell > sensory organ system cell > Cell type	conjunctival epithelium cell (sp.)		4	8.30742	0.0664257	8.26485	8.19943	8.25148	8.50056	8.50056
nasal epithelium cell > nasal mucosa cell > nose cell > sensory organ system cell > Cell type	nasal epithelium cell		19	8.28819	0.041682	8.26458	7.956	8.15876	8.39699	8.649
tonsillar resting T-cell (unspecified) > tonsillar T-cell (unspecified) > T-cell (unspecified) > T-cell > T-cell lineage > lymphocyte > lymphoid leukocyte > leukocyte > hematopoietic and immune system cell > Cell type	tonsillar resting T-cell (unspecified)		5	8.29688	0.0478701	8.26435	8.1644	8.25328	8.35896	8.4434
pancreatic islet cell > endocrine pancreatic cell > endocrine system (except testis and ovary) cell > Cell type	pancreatic islet cell		37	8.24969	0.029944	8.26369	7.75335	8.12624	8.38948	8.56056
satellite cell derived myoblast > skeletal muscle myoblast > skeletal muscle cell > musculoskeletal system cell > Cell type	satellite cell derived myoblast		12	8.2896	0.0607503	8.2636	8.02824	8.1497	8.44501	8.66938
salivary gland > mouth (oral cavity) > gastrointestinal tract > alimentary system > Tissue	salivary gland		10	8.26114	0.0551151	8.26359	8.09756	8.19348	8.3046	8.37191
sigmoid colon > distal colonic mucosa > distal colon > colon > colorectum > large intestine > intestine > gastrointestinal tract > alimentary system > Tissue	sigmoid colon		30	8.16643	0.0570062	8.2607	7.53341	7.93133	8.37552	8.66274
joint synovium > joint capsule > joint > skeletal system (except bone marrow) > musculoskeletal system > Tissue	joint synovium		45	8.26675	0.0307119	8.26059	7.8071	8.1535	8.40131	8.62007
descending colon > distal colonic mucosa > distal colon > colon > colorectum > large intestine > intestine > gastrointestinal tract > alimentary system > Tissue	descending colon		6	8.27137	0.033649	8.25626	8.17971	8.2008	8.35887	8.37634
tonsillar centroblast > centroblast (Bm3 cell) > germinal center B-cell > mature B-cell > B-cell > B-cell lineage > lymphocyte > lymphoid leukocyte > leukocyte > hematopoietic and immune system cell > Cell type	tonsillar centroblast	A tonsillar germinal center B-cell that is rapidly dividing and is typically described as IgD-negative, CD38-positive, and CD77-positive. Somatic hypermutation of the immunoglobulin V gene region can occur during proliferation of this cell type.	15	8.90215	0.259272	8.25441	7.86369	7.94802	9.94872	10.1321
resting T-cell (unspecified) > T-cell (unspecified) > T-cell > T-cell lineage > lymphocyte > lymphoid leukocyte > leukocyte > hematopoietic and immune system cell > Cell type	resting T-cell (unspecified)		2	8.25005	0.0239296	8.25005	8.22612	8.22612	8.27398	8.27398
ascending colon > proximal colonic mucosa > proximal colon > colon > colorectum > large intestine > intestine > gastrointestinal tract > alimentary system > Tissue	ascending colon		8	8.13722	0.131905	8.24623	7.63067	7.82883	8.47029	8.59883
amygdala > temporal lobe > cerebral cortex lobe / region > cerebral cortex (neopallium) > cerebral hemisphere > telencephalon (cerebrum) > forebrain (prosencephalon) > brain (encephalon) > central nervous system (CNS) > nervous system > Tissue	amygdala		66	8.2945	0.0305169	8.2415	7.89688	8.11582	8.50052	8.92511
biceps femoris muscle > thigh muscle > muscle of lower limb > skeletal muscle > musculoskeletal system > Tissue	biceps femoris muscle		47	8.30981	0.0655351	8.23668	7.67913	7.97865	8.57391	9.3969
amniocyte > amnion (amniotic membrane) cell > chorioamniotic membrane cell > extraembryonic cell > gestational structure cell > Cell type	amniocyte		18	8.25775	0.0547507	8.23361	7.83099	8.08486	8.45002	8.73451
tonsillar activated T-cell (unspecified) > tonsillar T-cell (unspecified) > T-cell (unspecified) > T-cell > T-cell lineage > lymphocyte > lymphoid leukocyte > leukocyte > hematopoietic and immune system cell > Cell type	tonsillar activated T-cell (unspecified)		5	8.21699	0.0767164	8.23242	8.19795	8.19795	8.30802	8.40242
heart left ventricle > heart ventricle > heart muscle (myocardium, cardiac muscle) > heart > cardiovascular system > circulatory system > Tissue	heart left ventricle		140	8.25246	0.0185275	8.22985	7.87983	8.10627	8.3423	8.69248
bronchoalveolar system cell > lung cell > respiratory system cell > Cell type	bronchoalveolar system cell	----	57	8.23514	0.0162977	8.22636	7.96642	8.13253	8.27626	8.44588
umbilical vein endothelium cell > umbilical vein cell > umbilical cord cell > extraembryonic cell > gestational structure cell > Cell type	umbilical vein endothelium cell		187	8.34343	0.0395459	8.2253	7.40744	7.95053	8.66039	9.50224
globus pallidus > corpus striatum > basal ganglia > cerebral hemisphere > telencephalon (cerebrum) > forebrain (prosencephalon) > brain (encephalon) > central nervous system (CNS) > nervous system > Tissue	globus pallidus		14	8.24783	0.0423923	8.22355	7.98242	8.14221	8.32409	8.39262
uterine cervix > uterus > female reproductive system > reproductive system > Tissue	uterine cervix		8	8.24802	0.101911	8.22199	7.9367	8.0187	8.58534	8.61703
artery > blood vessel > vascular system > cardiovascular system > circulatory system > Tissue	artery		1	8.22193	NaN	8.22193	8.22193	8.22193	8.22193	8.22193
inguinal lymph node > lymph node > lymphoid tissue > hematopoietic and immune system > Tissue	inguinal lymph node		94	8.22663	0.0156021	8.22182	7.84818	8.11806	8.33834	8.60151
peripheral blood CD4 T-cell (unspecified) > CD4 T-cell (unspecified) > CD4 T-cell > T-cell > T-cell lineage > lymphocyte > lymphoid leukocyte > leukocyte > hematopoietic and immune system cell > Cell type	peripheral blood CD4 T-cell (unspecified)		251	8.30267	0.0253886	8.21839	7.56346	8.04023	8.43725	9.01047
cerebellum > metencephalon > hindbrain (rhombencephalon) > brain (encephalon) > central nervous system (CNS) > nervous system > Tissue	cerebellum		51	8.22112	0.0213506	8.2183	7.91283	8.15886	8.3336	8.57698
pharyngeal mucosa > pharynx > respiratory system > Tissue	pharyngeal mucosa		8	8.28847	0.171606	8.21712	7.6314	8.0798	8.94172	9.0202
dendritic cell > leukocyte > hematopoietic and immune system cell > Cell type	dendritic cell		14	8.244	0.0679313	8.21543	8.02923	8.08433	8.24179	8.30022
heart > cardiovascular system > circulatory system > Tissue	heart		2	8.21498	0.0585394	8.21498	8.15644	8.15644	8.27352	8.27352
CD8 resting T-cell (unspecified) > CD8 T-cell (unspecified) > CD8 T-cell > T-cell > T-cell lineage > lymphocyte > lymphoid leukocyte > leukocyte > hematopoietic and immune system cell > Cell type	CD8 resting T-cell (unspecified)		1	8.2134	NaN	8.2134	8.2134	8.2134	8.2134	8.2134
colorectum > large intestine > intestine > gastrointestinal tract > alimentary system > Tissue	colorectum		4	8.23214	0.0651535	8.2132	8.09582	8.18775	8.40633	8.40633
vein > blood vessel > vascular system > cardiovascular system > circulatory system > Tissue	vein		1	8.2131	NaN	8.2131	8.2131	8.2131	8.2131	8.2131
descending colonic mucosa > descending colon > distal colonic mucosa > distal colon > colon > colorectum > large intestine > intestine > gastrointestinal tract > alimentary system > Tissue	descending colonic mucosa		138	8.09852	0.0348526	8.21162	7.29149	7.71012	8.39977	9.2525
CD4 activated T-cell (unspecified) > CD4 T-cell (unspecified) > CD4 T-cell > T-cell > T-cell lineage > lymphocyte > lymphoid leukocyte > leukocyte > hematopoietic and immune system cell > Cell type	CD4 activated T-cell (unspecified)		3	8.27225	0.0764448	8.20232	8.18948	8.18948	8.42496	8.42496
temporal lobe > cerebral cortex lobe / region > cerebral cortex (neopallium) > cerebral hemisphere > telencephalon (cerebrum) > forebrain (prosencephalon) > brain (encephalon) > central nervous system (CNS) > nervous system > Tissue	temporal lobe		18	8.23731	0.0653807	8.20192	7.92178	8.02813	8.27212	8.3981
cerebral cortex (neopallium) > cerebral hemisphere > telencephalon (cerebrum) > forebrain (prosencephalon) > brain (encephalon) > central nervous system (CNS) > nervous system > Tissue	cerebral cortex (neopallium)		23	8.36653	0.0999787	8.20183	7.80497	8.0713	8.6215	9.44429
lung vein endothelium cell > vein endothelium cell > vascular endothelium cell > blood vessel cell > vascular system cell > cardiovascular system cell > circulatory system cell > Cell type	lung vein endothelium cell		2	8.20127	0.10825	8.20127	8.09302	8.09302	8.30952	8.30952
prefrontal cortex > frontal lobe > cerebral cortex lobe / region > cerebral cortex (neopallium) > cerebral hemisphere > telencephalon (cerebrum) > forebrain (prosencephalon) > brain (encephalon) > central nervous system (CNS) > nervous system > Tissue	prefrontal cortex		101	8.23754	0.023723	8.20031	7.62936	8.0536	8.40421	8.84809
tumor derived CD4 T-cell (unspecified) > CD4 T-cell (unspecified) > CD4 T-cell > T-cell > T-cell lineage > lymphocyte > lymphoid leukocyte > leukocyte > hematopoietic and immune system cell > Cell type	tumor derived CD4 T-cell (unspecified)		26	8.22176	0.0574198	8.19716	7.67165	8.02796	8.45968	8.75549
adipose tissue (fat) > connective tissue > Tissue	adipose tissue (fat)		15	8.34538	0.113709	8.19441	7.92309	8.09703	8.37308	8.45125
chondrogenic progenitor cell > cartilage cell > skeletal system cell > musculoskeletal system cell > Cell type	chondrogenic progenitor cell		6	8.19513	0.0390485	8.19352	8.06102	8.14792	8.23798	8.33682
middle temporal gyrus (Brodmann area 21) > temporal lobe > cerebral cortex lobe / region > cerebral cortex (neopallium) > cerebral hemisphere > telencephalon (cerebrum) > forebrain (prosencephalon) > brain (encephalon) > central nervous system (CNS) > nervous system > Tissue	middle temporal gyrus (Brodmann area 21)		31	8.24776	0.0379112	8.19288	7.90147	8.09196	8.4661	8.66014
penis > male reproductive system > reproductive system > Tissue	penis		6	8.22047	0.0416028	8.19263	8.12314	8.12376	8.34172	8.34895
diencephalon > forebrain (prosencephalon) > brain (encephalon) > central nervous system (CNS) > nervous system > Tissue	diencephalon		1	8.19047	NaN	8.19047	8.19047	8.19047	8.19047	8.19047
myoblast derived myotube > skeletal muscle myotube > skeletal muscle cell > musculoskeletal system cell > Cell type	myoblast derived myotube		11	8.19245	0.0312978	8.18903	8.11187	8.13791	8.19224	8.19224
adrenal gland cortex (adrenal cortex) > adrenal gland > endocrine system (except testis and ovary) > Tissue	adrenal gland cortex (adrenal cortex)		36	8.20109	0.0430265	8.18856	7.70563	8.05702	8.34975	8.72707
peripheral blood plasmacytoid dendritic cell > plasmacytoid dendritic cell > dendritic cell > leukocyte > hematopoietic and immune system cell > Cell type	peripheral blood plasmacytoid dendritic cell	Synonyms: peripheral blood lymphoid dendritic cell, peripheral blood interferon-producing dendritic cell. A dendritic cell type of distinct morphology, localization, and surface marker expression from other dendritic cell types and associated with early stage immune responses, particularly the release of physiologically abundant amounts of type I interferons in response to infection.	5	8.17706	0.0509785	8.1876	8.15411	8.15411	8.21485	8.21485
blood erythroid progenitor cell > blood hematopoietic stem / progenitor cell > hematopoietic stem / progenitor cell > hematopoietic and immune system cell > Cell type	blood erythroid progenitor cell		12	8.19875	0.0509155	8.18726	7.87934	8.09223	8.38539	8.45549
peripheral blood CD4 resting T-cell (unspecified) > peripheral blood CD4 T-cell (unspecified) > CD4 T-cell (unspecified) > CD4 T-cell > T-cell > T-cell lineage > lymphocyte > lymphoid leukocyte > leukocyte > hematopoietic and immune system cell > Cell type	peripheral blood CD4 resting T-cell (unspecified)		5	8.0999	0.060198	8.18428	7.91719	7.99441	8.19584	8.2078
thyroid gland > endocrine system (except testis and ovary) > Tissue	thyroid gland		21	8.42786	0.115334	8.18225	7.87301	8.04363	9.0321	9.44
ovary (female gonad) > female reproductive system > reproductive system > Tissue	ovary (female gonad)		9	8.17788	0.0778033	8.18175	7.85212	7.98157	8.42953	8.47228
cumulus cell > ovarian follicle cell > ovarian cortex cell > ovary (female gonad) cell > female reproductive system cell > reproductive system cell > Cell type	cumulus cell		37	8.20509	0.0252588	8.17946	7.91127	8.09471	8.26997	8.44108
thalamus (dorsal thalamus) > diencephalon > forebrain (prosencephalon) > brain (encephalon) > central nervous system (CNS) > nervous system > Tissue	thalamus (dorsal thalamus)		18	8.30109	0.121853	8.17815	7.90917	8.12055	8.37217	8.58571
medulla oblongata > myelencephalon > hindbrain (rhombencephalon) > brain (encephalon) > central nervous system (CNS) > nervous system > Tissue	medulla oblongata		19	8.32876	0.113579	8.17762	7.80607	8.07965	8.32319	8.5998
B-cell > B-cell lineage > lymphocyte > lymphoid leukocyte > leukocyte > hematopoietic and immune system cell > Cell type	B-cell		35	8.35091	0.0904564	8.17183	7.53551	8.00854	8.48002	8.75789
uterine myometrium > uterus > female reproductive system > reproductive system > Tissue	uterine myometrium		58	8.21519	0.0353817	8.1634	7.75469	8.01903	8.40037	8.87805
large intestine > intestine > gastrointestinal tract > alimentary system > Tissue	large intestine		6	8.15755	0.0524569	8.1629	7.9462	8.10711	8.26866	8.29756
pars compacta > substantia nigra > midbrain (mesencephalon) > brain (encephalon) > central nervous system (CNS) > nervous system > Tissue	pars compacta		7	8.29012	0.0902794	8.16199	8.08762	8.13139	8.43962	8.75225
small intestine > intestine > gastrointestinal tract > alimentary system > Tissue	small intestine		3	8.31071	0.196303	8.16169	8.07066	8.07066	8.69978	8.69978
tumor derived astrocyte > astrocyte (unspecified) > astrocyte > glia cell > central nervous system cell > nervous system cell > Cell type	tumor derived astrocyte		1	8.16143	NaN	8.16143	8.16143	8.16143	8.16143	8.16143
trabecular meshwork cell > eye cell > sensory organ system cell > Cell type	trabecular meshwork cell		12	8.11777	0.0361949	8.15886	7.91833	8.09202	8.22415	8.2681
heart ventricle > heart muscle (myocardium, cardiac muscle) > heart > cardiovascular system > circulatory system > Tissue	heart ventricle		6	8.19012	0.0704352	8.15722	8.0162	8.03006	8.31633	8.46369
stomach > gastrointestinal tract > alimentary system > Tissue	stomach		46	8.20922	0.0362477	8.15598	7.89682	8.06113	8.33561	8.57909
hypothalamus > diencephalon > forebrain (prosencephalon) > brain (encephalon) > central nervous system (CNS) > nervous system > Tissue	hypothalamus		15	8.25895	0.0669622	8.15168	8.0445	8.10638	8.23769	8.42438
tonsillar centrocyte > centrocyte (Bm4) > germinal center B-cell > mature B-cell > B-cell > B-cell lineage > lymphocyte > lymphoid leukocyte > leukocyte > hematopoietic and immune system cell > Cell type	tonsillar centrocyte	A tonsillar germinal center B-cell that is typically described as CD77-negative, IgD-negative, and CD38-positive. These cells have undergone somatic mutation of the B-cell receptor.	15	8.93069	0.263076	8.15132	7.91678	8.00411	10.0808	10.2162
jejunum > small intestine > intestine > gastrointestinal tract > alimentary system > Tissue	jejunum		8	8.21728	0.0791223	8.15097	8.00478	8.09577	8.38672	8.68141
pyloric antrum > gastric (stomach) region > stomach > gastrointestinal tract > alimentary system > Tissue	pyloric antrum		8	8.19245	0.0597418	8.15047	7.97327	8.11541	8.40037	8.45339
gall bladder > liver and biliary system > alimentary system > Tissue	gall bladder		1	8.14685	NaN	8.14685	8.14685	8.14685	8.14685	8.14685
oral mucosa (unspecified) > mouth (oral cavity) > gastrointestinal tract > alimentary system > Tissue	oral mucosa (unspecified)		87	8.17337	0.0190358	8.14532	7.81628	8.05664	8.2511	8.50498
cerebral cortex astrocyte > telencephalon astrocyte > forebrain astrocyte > brain astrocyte (unspecified) > astrocyte (unspecified) > astrocyte > glia cell > central nervous system cell > nervous system cell > Cell type	cerebral cortex astrocyte		2	8.14509	0.387464	8.14509	7.75762	7.75762	8.53255	8.53255
ileal mucosa > ileum > small intestine > intestine > gastrointestinal tract > alimentary system > Tissue	ileal mucosa		42	8.16652	0.0286334	8.14447	7.82126	8.0561	8.26045	8.56407
osteoblast > bone cell > bone tissue cell > skeletal system cell > musculoskeletal system cell > Cell type	osteoblast		14	8.18731	0.0620478	8.14439	7.89451	8.05213	8.2279	8.46756
stomach fundus > gastric (stomach) region > stomach > gastrointestinal tract > alimentary system > Tissue	stomach fundus		8	8.12206	0.041192	8.14293	7.92095	8.06388	8.2006	8.29861
aorta endothelium cell > blood vessel endothelium cell > vascular endothelium cell > blood vessel cell > vascular system cell > cardiovascular system cell > circulatory system cell > Cell type	aorta endothelium cell		2	8.14114	0.169425	8.14114	7.97172	7.97172	8.31057	8.31057
peripheral blood plasma cell > plasma cell > antibody-secreting cell > B-cell lineage > lymphocyte > lymphoid leukocyte > leukocyte > hematopoietic and immune system cell > Cell type	peripheral blood plasma cell	A terminally differentiated, post-mitotic, antibody secreting cell of the B-cell lineage typically described as CD138-positive, surface immunoglobulin-negative, and MHC Class II-negative isolated from the peripheral blood.	2	8.13955	0.0438881	8.13955	8.09566	8.09566	8.18344	8.18344
chorion villus > chorion (chorionic membrane) > chorioamniotic membrane > extraembryonic tissue / fluid > gestational structure > Tissue	chorion villus		12	8.12282	0.0257021	8.13752	7.99899	8.10402	8.20046	8.25233
peripheral blood monocyte > monocyte > myeloid leukocyte > leukocyte > hematopoietic and immune system cell > Cell type	peripheral blood monocyte		181	8.32012	0.0450606	8.13617	7.26716	7.88142	8.59876	9.6728
aorta smooth muscle cell > artery smooth muscle cell > vascular smooth muscle cell > blood vessel cell > vascular system cell > cardiovascular system cell > circulatory system cell > Cell type	aorta smooth muscle cell		6	8.25991	0.117538	8.13343	8.03749	8.06598	8.40956	8.77956
peripheral blood eosinophil granulocyte > eosinophil granulocyte > granulocyte (polymorphonuclear leukocyte) > myeloid leukocyte > leukocyte > hematopoietic and immune system cell > Cell type	peripheral blood eosinophil granulocyte		7	8.12703	0.0519711	8.13309	7.9794	7.9982	8.19249	8.37212
subthalamic nucleus > subthalamus (ventral thalamus) > diencephalon > forebrain (prosencephalon) > brain (encephalon) > central nervous system (CNS) > nervous system > Tissue	subthalamic nucleus		18	8.12445	0.0358446	8.13074	7.81871	8.02542	8.17433	8.37221
peripheral blood lymphocyte > lymphocyte > lymphoid leukocyte > leukocyte > hematopoietic and immune system cell > Cell type	peripheral blood lymphocyte		284	8.32289	0.0353775	8.12817	7.51971	7.99842	8.4157	8.97387
tonsil > lymphoid tissue > hematopoietic and immune system > Tissue	tonsil		9	8.02376	0.118667	8.1249	7.56651	7.98105	8.30323	8.36111
peripheral blood T-cell (unspecified) > T-cell (unspecified) > T-cell > T-cell lineage > lymphocyte > lymphoid leukocyte > leukocyte > hematopoietic and immune system cell > Cell type	peripheral blood T-cell (unspecified)		2	8.12426	0.15605	8.12426	7.96821	7.96821	8.28031	8.28031
subcutaneous abdominal adipose tissue (SAAT) > abdominal adipose tissue > adipose tissue (fat) > connective tissue > Tissue	subcutaneous abdominal adipose tissue (SAAT)		725	8.11001	0.0128472	8.12226	7.23362	7.85643	8.34079	8.98678
mesenchymal stem cell derived adipocyte > adipose tissue (fat) cell > connective tissue cell > Cell type	mesenchymal stem cell derived adipocyte		24	8.14123	0.0314751	8.12215	7.89633	8.0439	8.21907	8.43746
gingiva > periodontium (periodontal apparatus) > mouth (oral cavity) > gastrointestinal tract > alimentary system > Tissue	gingiva		242	8.14274	0.0145865	8.11868	7.66406	7.99752	8.26515	8.65453
peripheral blood CD4 naive regulatory T-cell > CD4 naive regulatory T-cell > CD4 regulatory T-cell > CD4 T-cell > T-cell > T-cell lineage > lymphocyte > lymphoid leukocyte > leukocyte > hematopoietic and immune system cell > Cell type	peripheral blood CD4 naive regulatory T-cell		9	8.05966	0.0403259	8.11795	7.96596	8.0153	8.13324	8.17333
prostatic stroma fibromuscular cell > prostatic stroma cell > prostate (prostate gland) cell > male reproductive system cell > reproductive system cell > Cell type	prostatic stroma fibromuscular cell		5	8.11683	0.0552397	8.11437	7.9334	8.07692	8.21772	8.24174
substantia nigra > midbrain (mesencephalon) > brain (encephalon) > central nervous system (CNS) > nervous system > Tissue	substantia nigra		67	8.1635	0.0310571	8.11432	7.70515	7.98652	8.36711	8.79325
colonic mucosa > colon > colorectum > large intestine > intestine > gastrointestinal tract > alimentary system > Tissue	colonic mucosa		310	8.14608	0.0146493	8.11392	7.65213	7.95896	8.30779	8.78021
omental adipose tissue > intraperitoneal adipose tissue > intraabdominal adipose tissue (abdominal visceral adipose tissue) > abdominal adipose tissue > adipose tissue (fat) > connective tissue > Tissue	omental adipose tissue		40	8.0674	0.0371016	8.10998	7.60866	7.93062	8.25602	8.48091
colon > colorectum > large intestine > intestine > gastrointestinal tract > alimentary system > Tissue	colon		253	8.1047	0.0238705	8.1068	7.23266	7.84147	8.39429	9.14303
nipple > breast (mammary gland) > trunk > other body part > Tissue	nipple		8	8.09296	0.0389006	8.10628	7.91325	8.03183	8.2032	8.23707
stomach cardia > gastric (stomach) region > stomach > gastrointestinal tract > alimentary system > Tissue	stomach cardia		6	8.14053	0.0892759	8.10242	7.88264	7.98829	8.29343	8.47399
esophagus (oesophagus) > gastrointestinal tract > alimentary system > Tissue	esophagus (oesophagus)		27	8.13545	0.0342108	8.10103	7.93422	7.99633	8.1949	8.44381
iliac vein endothelium cell > vein endothelium cell > vascular endothelium cell > blood vessel cell > vascular system cell > cardiovascular system cell > circulatory system cell > Cell type	iliac vein endothelium cell		2	8.09921	0.0552011	8.09921	8.04401	8.04401	8.15441	8.15441
alveolar macrophage > pulmonary macrophage > macrophage > myeloid leukocyte > leukocyte > hematopoietic and immune system cell > Cell type	alveolar macrophage		222	8.25799	0.0350429	8.09861	7.63815	7.89433	8.47013	9.31114
hair follicle keratinocyte > hair follicle cell > skin appendage cell > skin cell > integumentary system cell > Cell type	hair follicle keratinocyte		6	8.10102	0.0668297	8.09723	8.03386	8.03386	8.13139	8.13139
ovarian (surface) epithelium cell > ovary (female gonad) cell > female reproductive system cell > reproductive system cell > Cell type	ovarian (surface) epithelium cell	Synonyms: mesothelial cell	65	8.38532	0.0856832	8.09719	7.49346	7.9034	8.61831	9.66883
parietal lobe > cerebral cortex lobe / region > cerebral cortex (neopallium) > cerebral hemisphere > telencephalon (cerebrum) > forebrain (prosencephalon) > brain (encephalon) > central nervous system (CNS) > nervous system > Tissue	parietal lobe		31	8.16371	0.0580126	8.09255	7.65843	7.95228	8.1631	8.35812
tonsillar germinal center B-cell > germinal center B-cell > mature B-cell > B-cell > B-cell lineage > lymphocyte > lymphoid leukocyte > leukocyte > hematopoietic and immune system cell > Cell type	tonsillar germinal center B-cell	Any germinal center B-cell that is part of a tonsil, not further specified.	12	8.07335	0.0329073	8.08673	7.9194	8.01162	8.12247	8.16451
cerebral white matter astrocyte > telencephalon astrocyte > forebrain astrocyte > brain astrocyte (unspecified) > astrocyte (unspecified) > astrocyte > glia cell > central nervous system cell > nervous system cell > Cell type	cerebral white matter astrocyte		7	8.05451	0.0854807	8.08672	7.71046	7.88801	8.29701	8.35531
pancreatic duct (duct of Wirsung) > pancreas > alimentary system > Tissue	pancreatic duct (duct of Wirsung)		6	8.07934	0.0811859	8.08631	7.75415	7.9969	8.24992	8.30246
pancreas > alimentary system > Tissue	pancreas		70	8.08973	0.0339775	8.08539	7.54303	7.84021	8.30159	8.91534
peripheral blood CD4 memory regulatory T-cell > CD4 memory regulatory T-cell > CD4 regulatory T-cell > CD4 T-cell > T-cell > T-cell lineage > lymphocyte > lymphoid leukocyte > leukocyte > hematopoietic and immune system cell > Cell type	peripheral blood CD4 memory regulatory T-cell		12	8.07643	0.0612298	8.0853	7.70266	7.99243	8.25205	8.4557
hippocampus > temporal lobe > cerebral cortex lobe / region > cerebral cortex (neopallium) > cerebral hemisphere > telencephalon (cerebrum) > forebrain (prosencephalon) > brain (encephalon) > central nervous system (CNS) > nervous system > Tissue	hippocampus		165	8.11488	0.0318345	8.08108	7.20623	7.8438	8.3102	8.9714
trigeminal ganglion > cranial ganglion > central nervous system (CNS) > nervous system > Tissue	trigeminal ganglion		16	8.10462	0.0360613	8.08106	7.85137	8.03045	8.20457	8.37064
joint > skeletal system (except bone marrow) > musculoskeletal system > Tissue	joint		3	8.07298	0.0660941	8.08018	7.95507	7.95507	8.18369	8.18369
hepatocyte > hepatic epithelium cell > hepatic mucosa cell > liver cell > liver and biliary system cell > alimentary system cell > Cell type	hepatocyte		2202	8.08643	0.0049682	8.07831	7.56323	7.94445	8.2054	8.58139
seminal vesicle > male reproductive system > reproductive system > Tissue	seminal vesicle		1	8.07703	NaN	8.07703	8.07703	8.07703	8.07703	8.07703
coronary artery > artery > blood vessel > vascular system > cardiovascular system > circulatory system > Tissue	coronary artery		6	8.06705	0.062245	8.07561	7.84015	7.96601	8.19047	8.25446
caudate nucleus > dorsal striatum > striatum > corpus striatum > basal ganglia > cerebral hemisphere > telencephalon (cerebrum) > forebrain (prosencephalon) > brain (encephalon) > central nervous system (CNS) > nervous system > Tissue	caudate nucleus		13	8.14613	0.15132	8.07307	7.65449	7.70127	8.32256	8.58327
adrenal gland > endocrine system (except testis and ovary) > Tissue	adrenal gland		6	8.05228	0.0626915	8.06998	8.02337	8.02337	8.16867	8.20882
bone marrow CD4 T-cell (unspecified) > CD4 T-cell (unspecified) > CD4 T-cell > T-cell > T-cell lineage > lymphocyte > lymphoid leukocyte > leukocyte > hematopoietic and immune system cell > Cell type	bone marrow CD4 T-cell (unspecified)		7	8.03761	0.0694	8.06937	7.77821	7.85294	8.21062	8.25134
neuron > central nervous system cell > nervous system cell > Cell type	neuron		6	8.0872	0.0333209	8.06928	8.01391	8.03056	8.0984	8.0984
iliac artery endothelium cell > artery endothelium cell > vascular endothelium cell > blood vessel cell > vascular system cell > cardiovascular system cell > circulatory system cell > Cell type	iliac artery endothelium cell		2	8.06893	0.00580215	8.06893	8.06313	8.06313	8.07473	8.07473
lymph node > lymphoid tissue > hematopoietic and immune system > Tissue	lymph node		9	8.02688	0.0536278	8.06684	7.78044	7.90153	8.13904	8.21476
colonic gland (crypt) > colonic epithelium > colonic mucosa > colon > colorectum > large intestine > intestine > gastrointestinal tract > alimentary system > Tissue	colonic gland (crypt)		10	8.04968	0.0531466	8.06574	7.78464	7.94398	8.16184	8.28887
spinal ganglion (dorsal root ganglion) > peripheral nervous system (PNS) > nervous system > Tissue	spinal ganglion (dorsal root ganglion)		16	8.04641	0.0418125	8.06133	7.74692	7.93811	8.20628	8.34021
peripheral blood mononuclear cell derived osteoclast > peripheral blood mononuclear cell > peripheral blood cell (not further specified) > hematopoietic and immune system cell > Cell type	peripheral blood mononuclear cell derived osteoclast		9	8.03595	0.0353669	8.06016	7.82668	7.9892	8.10554	8.17058
bone marrow monocyte > monocyte > myeloid leukocyte > leukocyte > hematopoietic and immune system cell > Cell type	bone marrow monocyte		16	8.03158	0.0511106	8.05993	7.60355	7.87781	8.17023	8.41583
fetal retina pigment epithelium cell > fetal retina cell > fetal eye cell > fetal cell > gestational structure cell > Cell type	fetal retina pigment epithelium cell		12	8.06665	0.0666159	8.05893	7.69363	7.87928	8.23309	8.42828
left internal mammary artery > internal mammary artery > artery > blood vessel > vascular system > cardiovascular system > circulatory system > Tissue	left internal mammary artery		12	8.04652	0.039297	8.05757	7.87964	7.95774	8.12609	8.34762
ascending colonic mucosa > ascending colon > proximal colonic mucosa > proximal colon > colon > colorectum > large intestine > intestine > gastrointestinal tract > alimentary system > Tissue	ascending colonic mucosa		35	8.04664	0.0303387	8.05675	7.66206	7.94439	8.16305	8.41244
leukocyte > hematopoietic and immune system cell > Cell type	leukocyte		179	8.1121	0.018306	8.05572	7.60058	7.94287	8.26679	8.71026
renal (kidney) cortex > kidney > urinary system > Tissue	renal (kidney) cortex		15	8.11367	0.0623003	8.05425	7.78712	7.91415	8.34678	8.59924
aorta > artery > blood vessel > vascular system > cardiovascular system > circulatory system > Tissue	aorta		4	8.06455	0.134363	8.05007	7.83226	7.83327	8.3258	8.3258
peripheral blood B-cell (unspecified) > B-cell (unspecified) > B-cell > B-cell lineage > lymphocyte > lymphoid leukocyte > leukocyte > hematopoietic and immune system cell > Cell type	peripheral blood B-cell (unspecified)		63	8.08392	0.0396191	8.04838	7.39257	7.81679	8.38267	8.60855
dermal lymphatic microvessel endothelium cell > lymphatic microvessel endothelium cell > lymphatic microvessel cell > lymph vessel cell > vascular system cell > cardiovascular system cell > circulatory system cell > Cell type	dermal lymphatic microvessel endothelium cell		13	8.06972	0.110275	8.04554	7.59716	7.79708	8.18532	8.68292
labial salivary gland > salivary gland > mouth (oral cavity) > gastrointestinal tract > alimentary system > Tissue	labial salivary gland		12	8.05763	0.0404451	8.0451	7.86938	7.94767	8.20462	8.26997
peripheral blood conventional dendritic cell > conventional dendritic cell > dendritic cell > leukocyte > hematopoietic and immune system cell > Cell type	peripheral blood conventional dendritic cell	Synonyms: peripheral blood classical dendritic cell, peripheral blood myeloid dendritic cell. Typically described as CD11c-high.	1	8.04379	NaN	8.04379	8.04379	8.04379	8.04379	8.04379
breast (mammary gland) > trunk > other body part > Tissue	breast (mammary gland)		323	8.04755	0.0125503	8.04139	7.54048	7.89312	8.19348	8.64252
right ventricle interventricular septum > heart right ventricle > heart ventricle > heart muscle (myocardium, cardiac muscle) > heart > cardiovascular system > circulatory system > Tissue	right ventricle interventricular septum		81	8.03684	0.0165502	8.04002	7.77538	7.95251	8.12288	8.37156
aortic valve > semilunar valve > heart valve > endocardium > heart > cardiovascular system > circulatory system > Tissue	aortic valve		20	8.12009	0.0899726	8.03719	7.51728	7.79844	8.55044	8.80922
occipital lobe > cerebral cortex lobe / region > cerebral cortex (neopallium) > cerebral hemisphere > telencephalon (cerebrum) > forebrain (prosencephalon) > brain (encephalon) > central nervous system (CNS) > nervous system > Tissue	occipital lobe		20	8.14094	0.0667766	8.03705	7.67165	7.93038	8.41726	8.71727
liver artery endothelium cell > artery endothelium cell > vascular endothelium cell > blood vessel cell > vascular system cell > cardiovascular system cell > circulatory system cell > Cell type	liver artery endothelium cell		3	7.97181	0.0674558	8.0365	7.83693	7.83693	8.04199	8.04199
dermis > skin > integumentary system > Tissue	dermis		16	8.04652	0.0468347	8.03295	7.77459	7.95053	8.26167	8.39601
T-cell > T-cell lineage > lymphocyte > lymphoid leukocyte > leukocyte > hematopoietic and immune system cell > Cell type	T-cell	Synonym: T-lymphocyte.	8	8.02925	0.028338	8.03039	7.87406	8.00175	8.10381	8.11395
umbilical artery endothelium cell > umbilical artery cell > umbilical cord cell > extraembryonic cell > gestational structure cell > Cell type	umbilical artery endothelium cell		9	8.03436	0.0657327	8.02995	7.76022	7.90869	8.0926	8.36444
ovarian granulosa cell > ovarian follicle cell > ovarian cortex cell > ovary (female gonad) cell > female reproductive system cell > reproductive system cell > Cell type	ovarian granulosa cell		7	8.03371	0.051675	8.02967	7.81532	7.96006	8.16531	8.23285
spinal cord > central nervous system (CNS) > nervous system > Tissue	spinal cord		17	8.05115	0.0454376	8.02248	7.83004	7.9151	8.10512	8.21364
mediastinal adipose tissue (MAT, intrathoracic adipose tissue) > cardiac visceral adipose tissue > thoracic adipose tissue > adipose tissue (fat) > connective tissue > Tissue	mediastinal adipose tissue (MAT, intrathoracic adipose tissue)		64	8.07485	0.0293633	8.02063	7.63641	7.92428	8.23817	8.65582
thymus > lymphoid tissue > hematopoietic and immune system > Tissue	thymus		3	8.06281	0.0689411	8.01937	7.9712	7.9712	8.19786	8.19786
heart atrium > heart muscle (myocardium, cardiac muscle) > heart > cardiovascular system > circulatory system > Tissue	heart atrium		8	8.07303	0.0586252	8.01833	7.84292	7.97722	8.20565	8.36045
sural nerve > peripheral nerve > peripheral nervous system (PNS) > nervous system > Tissue	sural nerve		35	7.9936	0.0251694	8.01787	7.70874	7.91013	8.08778	8.29494
midbrain (mesencephalon) > brain (encephalon) > central nervous system (CNS) > nervous system > Tissue	midbrain (mesencephalon)		15	8.00473	0.0606908	8.01675	7.65356	7.83219	8.09751	8.14042
prostate (prostate gland) > male reproductive system > reproductive system > Tissue	prostate (prostate gland)		22	8.0408	0.0228984	8.01469	7.89845	7.97968	8.10648	8.17782
chondrocyte > cartilage cell > skeletal system cell > musculoskeletal system cell > Cell type	chondrocyte		2	8.01426	0.213165	8.01426	7.80109	7.80109	8.22742	8.22742
lymph node CD4 T-cell (unspecified) > CD4 T-cell (unspecified) > CD4 T-cell > T-cell > T-cell lineage > lymphocyte > lymphoid leukocyte > leukocyte > hematopoietic and immune system cell > Cell type	lymph node CD4 T-cell (unspecified)		10	8.04357	0.0817714	8.01321	7.57107	7.90761	8.17413	8.43875
epicardial adipose tissue (EAT) > cardiac visceral adipose tissue > thoracic adipose tissue > adipose tissue (fat) > connective tissue > Tissue	epicardial adipose tissue (EAT)		46	8.00884	0.0259046	8.01075	7.68608	7.88996	8.09835	8.34731
posterior superior temporal gyrus (Brodmann area 22) > superior temporal gyrus > temporal lobe > cerebral cortex lobe / region > cerebral cortex (neopallium) > cerebral hemisphere > telencephalon (cerebrum) > forebrain (prosencephalon) > brain (encephalon) > central nervous system (CNS) > nervous system > Tissue	posterior superior temporal gyrus (Brodmann area 22)		42	8.01522	0.0276529	8.00985	7.69995	7.85318	8.09608	8.32057
liver > liver and biliary system > alimentary system > Tissue	liver		878	8.08374	0.0158639	8.0082	7.12547	7.77558	8.27403	9.01698
frontal lobe > cerebral cortex lobe / region > cerebral cortex (neopallium) > cerebral hemisphere > telencephalon (cerebrum) > forebrain (prosencephalon) > brain (encephalon) > central nervous system (CNS) > nervous system > Tissue	frontal lobe		65	8.01299	0.0347557	8.00815	7.47151	7.7952	8.18066	8.62469
conjunctiva > eye > sensory organ system > Tissue	conjunctiva		7	8.00562	0.0363602	8.00742	7.91187	7.92422	8.03645	8.18864
pulmonary (lung) fibroblast > pulmonary (lung) mucosa cell > lung cell > respiratory system cell > Cell type	pulmonary (lung) fibroblast	----	18	7.95853	0.0479666	8.00444	7.5572	7.76308	8.12485	8.29884
diaphragm muscle > chest muscle > muscle of torso > skeletal muscle > musculoskeletal system > Tissue	diaphragm muscle		10	8.00663	0.0408961	8.00039	7.97016	7.97016	8.01162	8.01162
uterus > female reproductive system > reproductive system > Tissue	uterus		2	7.99711	0.131559	7.99711	7.86555	7.86555	8.12866	8.12866
peripheral blood CD4 naive T-cell > CD4 naive T-cell > CD4 T-cell > T-cell > T-cell lineage > lymphocyte > lymphoid leukocyte > leukocyte > hematopoietic and immune system cell > Cell type	peripheral blood CD4 naive T-cell		154	8.31476	0.0676507	7.98826	7.42895	7.80426	8.24127	8.59126
peripheral blood mononuclear cell > peripheral blood cell (not further specified) > hematopoietic and immune system cell > Cell type	peripheral blood mononuclear cell		3621	8.02143	0.00516542	7.98681	7.26838	7.81333	8.17966	8.72376
lung microvessel endothelium cell > microvessel endothelium cell > vascular endothelium cell > blood vessel cell > vascular system cell > cardiovascular system cell > circulatory system cell > Cell type	lung microvessel endothelium cell		6	7.96273	0.0572269	7.98323	7.79448	7.81455	8.07114	8.12975
peripheral blood CD4 memory T-cell (unspecified) > CD4 memory T-cell (unspecified) > CD4 memory T-cell > CD4 T-cell > T-cell > T-cell lineage > lymphocyte > lymphoid leukocyte > leukocyte > hematopoietic and immune system cell > Cell type	peripheral blood CD4 memory T-cell (unspecified)		69	7.99612	0.0207545	7.98202	7.6946	7.87627	8.0805	8.33481
oral keratinocyte > oral epithelium cell (unspecified) > oral mucosa cell (unspecified) > mouth (oral cavity) cell > gastrointestinal tract cell > alimentary system cell > Cell type	oral keratinocyte		18	8.00573	0.0357162	7.97563	7.75422	7.92065	8.08359	8.17567
aortic root wall > aortic root > aorta > artery > blood vessel > vascular system > cardiovascular system > circulatory system > Tissue	aortic root wall		38	7.95544	0.0238752	7.96718	7.60118	7.86171	8.06851	8.21067
transiliac crest core > iliac crest > ilium > os coxae (hipbone) > pelvis bone > bone > skeletal system (except bone marrow) > musculoskeletal system > Tissue	transiliac crest core		18	8.00642	0.0538476	7.96584	7.59991	7.82814	8.22429	8.52415
synovial membrane fibroblast > synovium (synovial membrane) cell > musculoskeletal system cell > Cell type	synovial membrane fibroblast		74	7.97301	0.0308074	7.96384	7.44535	7.80961	8.12324	8.54168
liver vein endothelium cell > vein endothelium cell > vascular endothelium cell > blood vessel cell > vascular system cell > cardiovascular system cell > circulatory system cell > Cell type	liver vein endothelium cell		3	7.95063	0.0722276	7.96081	7.82075	7.82075	8.07034	8.07034
cornea > eye > sensory organ system > Tissue	cornea		6	8.02137	0.0830223	7.96046	7.82718	7.91982	8.05268	8.05268
buccal epithelium organotypic model > Organotypic / 3D culture	buccal epithelium organotypic model	The organotypic culture consists of normal, human-derived epithelial cells. The cells have been cultured to form multilayered, highly differentiated models of the human buccal phenotype.	34	7.95055	0.0311649	7.96035	7.52136	7.84455	8.12117	8.18641
internal mammary artery wall > internal mammary artery > artery > blood vessel > vascular system > cardiovascular system > circulatory system > Tissue	internal mammary artery wall		40	7.98033	0.03173	7.95454	7.6311	7.81807	8.12133	8.46041
urethra > urinary system > Tissue	urethra		8	7.94579	0.066596	7.95292	7.65628	7.84304	8.12127	8.2151
minor salivary gland > salivary gland > mouth (oral cavity) > gastrointestinal tract > alimentary system > Tissue	minor salivary gland		14	7.94059	0.0443382	7.95105	7.69077	7.82572	8.07361	8.26242
tendon synovium > tendon > musculoskeletal system > Tissue	tendon synovium		5	7.93427	0.0413063	7.94872	7.7894	7.90833	8.00848	8.01642
ileal epithelium cell > ileal mucosa cell > small intestinal mucosa cell > small intestine cell > intestine cell > gastrointestinal tract cell > alimentary system cell > Cell type	ileal epithelium cell		9	7.93425	0.0535845	7.94702	7.57645	7.85481	8.05317	8.08268
fetal retina pigment epithelium > fetal retina > fetal eye > fetus > fetal tissue / fluid > gestational structure > Tissue	fetal retina pigment epithelium		6	7.91365	0.0616473	7.94391	7.66761	7.82203	8.04843	8.05604
transverse colon > proximal colonic mucosa > proximal colon > colon > colorectum > large intestine > intestine > gastrointestinal tract > alimentary system > Tissue	transverse colon		3	8.0494	0.119705	7.94257	7.91725	7.91725	8.28836	8.28836
peripheral blood CD8 resting T-cell (unspecified) > peripheral blood CD8 T-cell (unspecified) > CD8 T-cell (unspecified) > CD8 T-cell > T-cell > T-cell lineage > lymphocyte > lymphoid leukocyte > leukocyte > hematopoietic and immune system cell > Cell type	peripheral blood CD8 resting T-cell (unspecified)		1	7.9424	NaN	7.9424	7.9424	7.9424	7.9424	7.9424
peripheral blood transitional stage B-cell (unspecified) > transitional stage B-cell > B-cell > B-cell lineage > lymphocyte > lymphoid leukocyte > leukocyte > hematopoietic and immune system cell > Cell type	peripheral blood transitional stage B-cell (unspecified)	An immature B-cell of an intermediate stage between the pre-B-cell stage and the mature naive stage with the phenotype surface IgM-positive and CD19-positive, is subject to the process of B-cell selection. A transitional B-cell migrates from the bone marrow into the peripheral circulation, and then to the spleen.	4	7.97609	0.154346	7.94149	7.63807	7.90032	8.38332	8.38332
prostatic stroma cell > prostate (prostate gland) cell > male reproductive system cell > reproductive system cell > Cell type	prostatic stroma cell		6	7.9399	0.0732528	7.93889	7.66931	7.82763	8.11145	8.1532
uterine endometrium stroma cell > uterine endometrium cell > uterus cell > female reproductive system cell > reproductive system cell > Cell type	uterine endometrium stroma cell		13	7.98165	0.0463104	7.93734	7.64767	7.89567	8.10082	8.25196
kidney > urinary system > Tissue	kidney		1150	7.94002	0.01005	7.93646	7.07852	7.70134	8.17592	8.87055
epidermis > skin > integumentary system > Tissue	epidermis		78	8.01665	0.0373521	7.93521	7.51136	7.76148	8.25526	8.7489
dermal fibroblast > dermis cell > skin cell > integumentary system cell > Cell type	dermal fibroblast		167	8.00821	0.0296283	7.9238	7.09761	7.72055	8.3568	8.74628
umbilical cord blood transitional stage B-cell > umbilical cord blood B-cell > umbilical cord blood B-cell lineage > umbilical cord blood derived lymphocyte > umbilical cord blood cell > umbilical cord cell > extraembryonic cell > gestational structure cell > Cell type	umbilical cord blood transitional stage B-cell	An immature B-cell of an intermediate stage between the pre-B-cell stage and the mature naive stage typically described as surface IgM-positive and CD19-positive, is subject to the process of B-cell selection. A transitional B-cell migrates from the bone marrow into the peripheral circulation, and then to the spleen.	4	7.91131	0.0127684	7.92157	7.91809	7.91809	7.92855	7.92855
peripheral blood granulocyte > granulocyte (polymorphonuclear leukocyte) > myeloid leukocyte > leukocyte > hematopoietic and immune system cell > Cell type	peripheral blood granulocyte		98	8.00693	0.0359319	7.92035	7.52129	7.82126	8.03722	8.30227
brain (encephalon) > central nervous system (CNS) > nervous system > Tissue	brain (encephalon)		46	8.26346	0.115952	7.91247	7.63169	7.76401	8.42882	8.79168
breast (mammary gland) stroma cell > breast (mammary gland) cell > trunk cell > other body part cell > Cell type	breast (mammary gland) stroma cell		18	7.9426	0.0345671	7.91175	7.75007	7.84486	8.01642	8.1819
sigmoid colonic mucosa > sigmoid colon > distal colonic mucosa > distal colon > colon > colorectum > large intestine > intestine > gastrointestinal tract > alimentary system > Tissue	sigmoid colonic mucosa		154	8.07534	0.0393767	7.91112	7.42282	7.77202	8.19732	8.5572
basal ganglia > cerebral hemisphere > telencephalon (cerebrum) > forebrain (prosencephalon) > brain (encephalon) > central nervous system (CNS) > nervous system > Tissue	basal ganglia		24	7.98092	0.0480653	7.90888	7.58586	7.85362	8.17891	8.44099
epididymal cauda > epididymal region > epididymis > male reproductive system > reproductive system > Tissue	epididymal cauda		3	7.97576	0.122121	7.90599	7.80793	7.80793	8.21335	8.21335
renal (kidney) medulla > kidney > urinary system > Tissue	renal (kidney) medulla		8	7.91287	0.0303409	7.90396	7.79422	7.87615	8.00338	8.02708
synovial fluid mononuclear cell > synovial fluid cell > musculoskeletal system cell > Cell type	synovial fluid mononuclear cell		21	7.91973	0.038584	7.89912	7.53916	7.80929	8.05864	8.22848
associative striatum > dorsal striatum > striatum > corpus striatum > basal ganglia > cerebral hemisphere > telencephalon (cerebrum) > forebrain (prosencephalon) > brain (encephalon) > central nervous system (CNS) > nervous system > Tissue	associative striatum		69	7.91546	0.0271549	7.89791	7.51001	7.76122	8.01992	8.37986
umbilical cord blood neutrophil granulocyte > umbilical cord blood granulocyte (polymorphonuclear leukocyte) > umbilical cord blood derived myeloid leukocyte > umbilical cord blood cell > umbilical cord cell > extraembryonic cell > gestational structure cell > Cell type	umbilical cord blood neutrophil granulocyte		6	7.92176	0.0484765	7.89619	7.77709	7.8614	7.97573	8.12397
spleen > lymphoid tissue > hematopoietic and immune system > Tissue	spleen		16	7.81781	0.0733767	7.8944	7.43946	7.73302	7.99175	8.06156
renal tubulointerstitium > nephron > kidney > urinary system > Tissue	renal tubulointerstitium		206	8.06707	0.0405999	7.88368	7.23611	7.66463	8.14221	8.84987
skeletal muscle myoblast > skeletal muscle cell > musculoskeletal system cell > Cell type	skeletal muscle myoblast		14	7.88015	0.055885	7.88313	7.57743	7.70667	8.02619	8.24859
frontal pole > frontal lobe > cerebral cortex lobe / region > cerebral cortex (neopallium) > cerebral hemisphere > telencephalon (cerebrum) > forebrain (prosencephalon) > brain (encephalon) > central nervous system (CNS) > nervous system > Tissue	frontal pole		3	7.8767	0.00158474	7.87701	7.87381	7.87381	7.87928	7.87928
synovium (synovial membrane) > musculoskeletal system > Tissue	synovium (synovial membrane)		191	7.896	0.0200368	7.87406	7.30214	7.70134	8.10528	8.67962
entorhinal cortex > retrohippocampal cortex > cerebral cortex lobe / region > cerebral cortex (neopallium) > cerebral hemisphere > telencephalon (cerebrum) > forebrain (prosencephalon) > brain (encephalon) > central nervous system (CNS) > nervous system > Tissue	entorhinal cortex		70	7.99499	0.0491641	7.8716	7.36676	7.66292	8.29889	9.02253
peripheral blood CD8 activated T-cell (unspecified) > peripheral blood CD8 T-cell (unspecified) > CD8 T-cell (unspecified) > CD8 T-cell > T-cell > T-cell lineage > lymphocyte > lymphoid leukocyte > leukocyte > hematopoietic and immune system cell > Cell type	peripheral blood CD8 activated T-cell (unspecified)		18	8.18153	0.229621	7.86828	7.18418	7.29545	9.44211	9.81965
gingival epithelium organotypic model > Organotypic / 3D culture	gingival epithelium organotypic model	The organotypic culture consists of normal, human-derived epithelial cells. The cells have been cultured to form multilayered, highly differentiated models of the gingival phenotype.	36	7.85056	0.0296079	7.86505	7.49705	7.74712	7.96272	8.17727
aortic valve cusp (leaflet) > aortic valve > semilunar valve > heart valve > endocardium > heart > cardiovascular system > circulatory system > Tissue	aortic valve cusp (leaflet)		15	7.81939	0.0459207	7.86344	7.41937	7.72206	7.93505	8.10617
microvessel endothelium cell > vascular endothelium cell > blood vessel cell > vascular system cell > cardiovascular system cell > circulatory system cell > Cell type	microvessel endothelium cell		6	7.83696	0.0252332	7.85788	7.72935	7.80684	7.88154	7.88826
vein endothelium cell > vascular endothelium cell > blood vessel cell > vascular system cell > cardiovascular system cell > circulatory system cell > Cell type	vein endothelium cell		24	7.90608	0.0578164	7.84849	7.48494	7.75148	8.09244	8.4536
epididymal corpus > epididymal region > epididymis > male reproductive system > reproductive system > Tissue	epididymal corpus		3	7.93633	0.140551	7.83914	7.75649	7.75649	8.21335	8.21335
synovial fluid > musculoskeletal system > Tissue	synovial fluid		1	7.83074	NaN	7.83074	7.83074	7.83074	7.83074	7.83074
dental pulp stem cell > dental pulp cell > tooth cell > mouth (oral cavity) cell > gastrointestinal tract cell > alimentary system cell > Cell type	dental pulp stem cell		6	7.82451	0.0690224	7.82634	7.58097	7.7095	7.99339	8.0105
meniscal cell > cartilage cell > skeletal system cell > musculoskeletal system cell > Cell type	meniscal cell		8	7.89293	0.0594472	7.82126	7.69537	7.79889	8.125	8.15689
CD4 single positive thymocyte > thymocyte > T-cell lineage > lymphocyte > lymphoid leukocyte > leukocyte > hematopoietic and immune system cell > Cell type	CD4 single positive thymocyte	A CD4-positive, CD8-negative thymocyte.	3	7.75455	0.0902356	7.81928	7.5763	7.5763	7.86808	7.86808
bone marrow mononuclear cell > bone marrow hematopoietic cell (unspecified) > hematopoietic and immune system cell > Cell type	bone marrow mononuclear cell	Bone marrow mononuclear cells consist of monocytes, lymphocytes, hematopoietic stem cells and progenitor cells.	19	7.823	0.037515	7.81378	7.54295	7.7174	7.9384	8.15228
Brodmann area 46 > dorsolateral prefrontal cortex > prefrontal cortex > frontal lobe > cerebral cortex lobe / region > cerebral cortex (neopallium) > cerebral hemisphere > telencephalon (cerebrum) > forebrain (prosencephalon) > brain (encephalon) > central nervous system (CNS) > nervous system > Tissue	Brodmann area 46		112	7.95653	0.0440971	7.80795	7.20242	7.54782	8.43496	8.87086
cerebral white matter > cerebral hemisphere > telencephalon (cerebrum) > forebrain (prosencephalon) > brain (encephalon) > central nervous system (CNS) > nervous system > Tissue	cerebral white matter		28	8.02053	0.116081	7.80756	7.34421	7.65471	8.11858	8.49769
peripheral blood CD4 activated T-cell (unspecified) > peripheral blood CD4 T-cell (unspecified) > CD4 T-cell (unspecified) > CD4 T-cell > T-cell > T-cell lineage > lymphocyte > lymphoid leukocyte > leukocyte > hematopoietic and immune system cell > Cell type	peripheral blood CD4 activated T-cell (unspecified)		39	7.80788	0.044184	7.80064	7.37782	7.58045	7.99582	8.43692
coronary artery smooth muscle cell > artery smooth muscle cell > vascular smooth muscle cell > blood vessel cell > vascular system cell > cardiovascular system cell > circulatory system cell > Cell type	coronary artery smooth muscle cell		105	7.78935	0.0164394	7.79344	7.4591	7.66263	7.91636	8.17343
superior frontal gyrus > frontal lobe > cerebral cortex lobe / region > cerebral cortex (neopallium) > cerebral hemisphere > telencephalon (cerebrum) > forebrain (prosencephalon) > brain (encephalon) > central nervous system (CNS) > nervous system > Tissue	superior frontal gyrus		68	7.77964	0.0260975	7.78838	7.33154	7.66796	7.9276	8.23424
fetal retina > fetal eye > fetus > fetal tissue / fluid > gestational structure > Tissue	fetal retina		12	7.79234	0.0393778	7.78772	7.5352	7.73478	7.94615	7.97757
coronary artery endothelium cell > artery endothelium cell > vascular endothelium cell > blood vessel cell > vascular system cell > cardiovascular system cell > circulatory system cell > Cell type	coronary artery endothelium cell		17	7.8112	0.0476799	7.76944	7.5373	7.66448	7.93009	8.02901
umbilical cord blood naive B-cell > umbilical cord blood mature B-cell > umbilical cord blood B-cell > umbilical cord blood B-cell lineage > umbilical cord blood derived lymphocyte > umbilical cord blood cell > umbilical cord cell > extraembryonic cell > gestational structure cell > Cell type	umbilical cord blood naive B-cell	A naive B-cell isolated from the umbilical cord blood. A naive B-cell is a mature B-cell that is typically described as surface IgD-positive, surface IgM-positive, CD20-positive, CD27-negative and that has not yet been activated by antigen in the periphery.	2	7.75758	0.00516653	7.75758	7.75241	7.75241	7.76275	7.76275
corneal limbus > cornea > eye > sensory organ system > Tissue	corneal limbus		4	7.78538	0.131464	7.75485	7.52176	7.6311	8.11004	8.11004
Brodmann area 10 > anterior prefrontal cortex > prefrontal cortex > frontal lobe > cerebral cortex lobe / region > cerebral cortex (neopallium) > cerebral hemisphere > telencephalon (cerebrum) > forebrain (prosencephalon) > brain (encephalon) > central nervous system (CNS) > nervous system > Tissue	Brodmann area 10		51	7.74162	0.0232707	7.75275	7.35694	7.63546	7.85506	8.09334
fetal chondrocyte > fetal cartilage cell > fetal cell > gestational structure cell > Cell type	fetal chondrocyte		11	7.78026	0.0589912	7.74745	7.48535	7.61794	7.90418	8.11629
caecum (cecum) > large intestine > intestine > gastrointestinal tract > alimentary system > Tissue	caecum (cecum)		2	7.7076	0.00355434	7.7076	7.70404	7.70404	7.71115	7.71115
conventional dendritic cell > dendritic cell > leukocyte > hematopoietic and immune system cell > Cell type	conventional dendritic cell	Synonyms: classical dendritic cell, myeloid dendritic cell. Typically described as CD11c-high.	3	7.67758	0.0556329	7.68601	7.57728	7.57728	7.76944	7.76944
choroid microvessel endothelium cell > brain microvessel endothelium cell > microvessel endothelium cell > vascular endothelium cell > blood vessel cell > vascular system cell > cardiovascular system cell > circulatory system cell > Cell type	choroid microvessel endothelium cell		3	7.6454	0.0310745	7.67122	7.58353	7.58353	7.68145	7.68145
tarsal conjunctiva > palpebral conjunctiva > conjunctiva > eye > sensory organ system > Tissue	tarsal conjunctiva		60	7.6445	0.0194139	7.6521	7.30332	7.53387	7.77755	7.97057
embryonic cell > gestational structure cell > Cell type	embryonic cell		6	7.62991	0.0507316	7.64469	7.60911	7.60911	7.70667	7.76792
postcentral gyrus > parietal lobe > cerebral cortex lobe / region > cerebral cortex (neopallium) > cerebral hemisphere > telencephalon (cerebrum) > forebrain (prosencephalon) > brain (encephalon) > central nervous system (CNS) > nervous system > Tissue	postcentral gyrus		66	7.68545	0.0315349	7.64196	7.1816	7.49305	7.87141	8.30816
umbilical cord blood cell > umbilical cord cell > extraembryonic cell > gestational structure cell > Cell type	umbilical cord blood cell		12	7.65119	0.0288848	7.64028	7.52638	7.5744	7.72976	7.81999
foreskin-derived neonatal fibroblast > foreskin fibroblast cell > skin fibroblast > skin cell > integumentary system cell > Cell type	foreskin-derived neonatal fibroblast		2	7.62324	0.149699	7.62324	7.47354	7.47354	7.77294	7.77294
retina microvessel endothelium cell > eye microvessel endothelium cell > microvessel endothelium cell > vascular endothelium cell > blood vessel cell > vascular system cell > cardiovascular system cell > circulatory system cell > Cell type	retina microvessel endothelium cell		3	7.53759	0.104983	7.62227	7.32885	7.32885	7.66164	7.66164
glomerulus > renal corpuscle > nephron > kidney > urinary system > Tissue	glomerulus		201	7.65325	0.0263986	7.60177	7.0864	7.47427	7.73586	8.06921
bronchoalveolar derived mesenchymal stromal cell > bronchoalveolar system cell > lung cell > respiratory system cell > Cell type	bronchoalveolar derived mesenchymal stromal cell	----	8	7.65814	0.0592368	7.5832	7.51072	7.55911	7.76295	8.00084
choroid > uvea > eye > sensory organ system > Tissue	choroid		1	7.58052	NaN	7.58052	7.58052	7.58052	7.58052	7.58052
retinal pigment epithelium > retina > eye > sensory organ system > Tissue	retinal pigment epithelium		2	7.5803	0.0139458	7.5803	7.56636	7.56636	7.59425	7.59425
medial rectus muscle > rectus muscle > extraocular muscle > muscle of head > skeletal muscle > musculoskeletal system > Tissue	medial rectus muscle		7	7.53971	0.0883542	7.57509	7.16027	7.2879	7.74759	7.78666
gingival fibroblast > gingival cell > periodontium (periodontal apparatus) cell > mouth (oral cavity) cell > gastrointestinal tract cell > alimentary system cell > Cell type	gingival fibroblast		5	7.52894	0.0401198	7.54774	7.54774	7.54774	7.54774	7.54774
embryonic prechondrocyte > embryonic cartilage cell > embryonic cell > gestational structure cell > Cell type	embryonic prechondrocyte		6	7.54311	0.0733102	7.53098	7.30113	7.42694	7.70667	7.76195
peritoneum > abdomen > other body part > Tissue	peritoneum		22	7.4979	0.0418134	7.51723	7.10234	7.31633	7.62169	7.88362
skeletal muscle derived mesoangioblast > skeletal muscle cell > musculoskeletal system cell > Cell type	skeletal muscle derived mesoangioblast		3	7.59785	0.121627	7.49665	7.45689	7.45689	7.84002	7.84002
double positive thymocyte > thymocyte > T-cell lineage > lymphocyte > lymphoid leukocyte > leukocyte > hematopoietic and immune system cell > Cell type	double positive thymocyte	A thymocyte expressing both the CD4 and CD8 coreceptors.	3	7.57495	0.192961	7.43313	7.33503	7.33503	7.9567	7.9567
lateral rectus muscle > rectus muscle > extraocular muscle > muscle of head > skeletal muscle > musculoskeletal system > Tissue	lateral rectus muscle		1	7.39146	NaN	7.39146	7.39146	7.39146	7.39146	7.39146
iris microvessel endothelium cell > eye microvessel endothelium cell > microvessel endothelium cell > vascular endothelium cell > blood vessel cell > vascular system cell > cardiovascular system cell > circulatory system cell > Cell type	iris microvessel endothelium cell		2	7.275	0.143864	7.275	7.13114	7.13114	7.41886	7.41886
splenic CD8 activated T-cell (unspecified) > splenic CD8 T-cell (unspecified) > CD8 T-cell (unspecified) > CD8 T-cell > T-cell > T-cell lineage > lymphocyte > lymphoid leukocyte > leukocyte > hematopoietic and immune system cell > Cell type	splenic CD8 activated T-cell (unspecified)		9	7.20896	0.0607991	7.24203	7.08768	7.20359	7.31279	7.40173

## Sheet: C6orf118 Mouse RNA-seq
(log2 scale)			Gene Symbol	1700010I14Rik	1700010I14Rik	1700010I14Rik	1700010I14Rik	1700010I14Rik	1700010I14Rik	1700010I14Rik
			Gene	ENSMUSG00000023873	ENSMUSG00000023873	ENSMUSG00000023873	ENSMUSG00000023873	ENSMUSG00000023873	ENSMUSG00000023873	ENSMUSG00000023873
			Measure	ENSMUSG00000023873	ENSMUSG00000023873	ENSMUSG00000023873	ENSMUSG00000023873	ENSMUSG00000023873	ENSMUSG00000023873	ENSMUSG00000023873
Path to root	Anatomy	Description	# samples	Mean value	Standard Error	Median Value	Lower Whisker	Lower Quartile	Upper Quartile	Upper Whisker
testis (male gonad) > male reproductive system > reproductive system > Tissue	testis (male gonad)		28	7.79924	0.137399	7.77212	5.83857	7.50439	8.65817	8.88349
peritoneal mast cell > mast cell > myeloid leukocyte > leukocyte > hematopoietic and immune system cell > Cell type	peritoneal mast cell		13	3.14732	0.0849223	3.19475	2.69219	3.06841	3.32918	3.55446
double positive thymocyte > thymocyte > T-cell lineage > lymphocyte > lymphoid leukocyte > leukocyte > hematopoietic and immune system cell > Cell type	double positive thymocyte	A thymocyte expressing both the CD4 and CD8 coreceptors.	2	3.05148	0.363227	3.05148	2.68825	2.68825	3.4147	3.4147
immature gd thymocyte > gamma-delta thymocyte > thymocyte > T-cell lineage > lymphocyte > lymphoid leukocyte > leukocyte > hematopoietic and immune system cell > Cell type	immature gd thymocyte	An immature thymocyte bearing a gamma-delta (gd) T cell receptor complex.	5	2.88803	0.0997933	2.89002	2.60468	2.73564	3.07666	3.13314
splenic centroblast > centroblast (Bm3 cell) > germinal center B-cell > mature B-cell > B-cell > B-cell lineage > lymphocyte > lymphoid leukocyte > leukocyte > hematopoietic and immune system cell > Cell type	splenic centroblast		3	2.76588	0.146934	2.88385	2.47381	2.47381	2.93999	2.93999
optic nerve (CN II) microglia cell > cranial nerve microglia > microglia cell > glia cell > central nervous system cell > nervous system cell > Cell type	optic nerve (CN II) microglia cell		2	2.79055	0.733946	2.79055	2.05661	2.05661	3.5245	3.5245
double negative 2b (DN2b) thymocyte > double negative 2 (DN2) thymocyte > double negative thymocyte > thymocyte > T-cell lineage > lymphocyte > lymphoid leukocyte > leukocyte > hematopoietic and immune system cell > Cell type	double negative 2b (DN2b) thymocyte	A thymocyte that is typically described as CD4-negative, CD8-negative, CD44-positive, and CD25-positive and CD117 (Kit)-low. Observed in mice.	2	2.6575	0.188851	2.6575	2.46865	2.46865	2.84635	2.84635
yolk sac macrophage precursor > yolk sac cell > extraembryonic cell > gestational structure cell > Cell type	yolk sac macrophage precursor		3	2.2763	0.355906	2.60239	1.5653	1.5653	2.66121	2.66121
splenic centrocyte > centrocyte (Bm4) > germinal center B-cell > mature B-cell > B-cell > B-cell lineage > lymphocyte > lymphoid leukocyte > leukocyte > hematopoietic and immune system cell > Cell type	splenic centrocyte		3	2.39422	0.268892	2.58687	1.86307	1.86307	2.73272	2.73272
fraction A pre-pro-B-cell > precursor B-cell > B-cell > B-cell lineage > lymphocyte > lymphoid leukocyte > leukocyte > hematopoietic and immune system cell > Cell type	fraction A pre-pro-B-cell	Markers associated with mouse cells. A pro-B-cell that is typically described as CD45R/B220-positive, CD43-positive, HSA-low, BP-1-negative and Ly6c-negative. This cell type is also described as being lin-negative, AA4-positive, Kit-positive, IL7Ra-positive and CD45R-positive.	2	2.56083	0.109796	2.56083	2.45103	2.45103	2.67063	2.67063
lumbar spinal cord dorsal horn microglia cell > lumbar spinal cord microglia cell > spinal cord microglia cell > microglia cell > glia cell > central nervous system cell > nervous system cell > Cell type	lumbar spinal cord dorsal horn microglia cell		23	2.66379	0.103551	2.49243	1.86283	2.32183	3.02374	3.80187
bone marrow neutrophil granulocyte > neutrophil granulocyte > granulocyte (polymorphonuclear leukocyte) > myeloid leukocyte > leukocyte > hematopoietic and immune system cell > Cell type	bone marrow neutrophil granulocyte		2	2.48468	0.0949057	2.48468	2.38978	2.38978	2.57959	2.57959
CD4 single positive thymocyte > thymocyte > T-cell lineage > lymphocyte > lymphoid leukocyte > leukocyte > hematopoietic and immune system cell > Cell type	CD4 single positive thymocyte	A CD4-positive, CD8-negative thymocyte.	2	2.44874	0.354396	2.44874	2.09434	2.09434	2.80313	2.80313
yolk sac erythro-myeloid progenitor > yolk sac cell > extraembryonic cell > gestational structure cell > Cell type	yolk sac erythro-myeloid progenitor		4	2.67382	0.314224	2.43437	2.2222	2.421	3.60433	3.60433
splenic memory B-cell (unspecified) > memory B-cell > mature B-cell > B-cell > B-cell lineage > lymphocyte > lymphoid leukocyte > leukocyte > hematopoietic and immune system cell > Cell type	splenic memory B-cell (unspecified)	A splenic memory B-cell is a mature B-cell that is long-lived, readily activated upon re-encounter of its antigenic determinant, and has been selected for expression of higher affinity immunoglobulin. This cell type is typically described as CD19-positive, CD20-positive, MHC Class II-positive, and CD138-negative. It has also been described as B220-positive, IgM-kappa-positive and AA4-negative. Al…	1	2.43169	NaN	2.43169	2.43169	2.43169	2.43169	2.43169
fraction B/C pro-B-cell > precursor B-cell > B-cell > B-cell lineage > lymphocyte > lymphoid leukocyte > leukocyte > hematopoietic and immune system cell > Cell type	fraction B/C pro-B-cell	A precursor B-cell that is typically described as AA4-positive, IgM-negative, CD19-positive, CD43-positive and HSA(CD24)-positive.	2	2.41226	0.0835092	2.41226	2.32875	2.32875	2.49577	2.49577
pre-B-cell (unspecified) > precursor B-cell > B-cell > B-cell lineage > lymphocyte > lymphoid leukocyte > leukocyte > hematopoietic and immune system cell > Cell type	pre-B-cell (unspecified)		6	2.38274	0.0804366	2.30076	2.21198	2.24683	2.51349	2.72263
CD8 single positive thymocyte > thymocyte > T-cell lineage > lymphocyte > lymphoid leukocyte > leukocyte > hematopoietic and immune system cell > Cell type	CD8 single positive thymocyte	A CD8-positive, CD4-negative thymocyte.	2	2.29236	0.206841	2.29236	2.08552	2.08552	2.4992	2.4992
splenic neutrophil granulocyte > neutrophil granulocyte > granulocyte (polymorphonuclear leukocyte) > myeloid leukocyte > leukocyte > hematopoietic and immune system cell > Cell type	splenic neutrophil granulocyte		21	2.17228	0.133701	2.27805	0.828732	1.84539	2.58663	3.21258
splenic NK T-cell (unspecified) > NK T-cell (unspecified) > NK T-cell > T-cell > T-cell lineage > lymphocyte > lymphoid leukocyte > leukocyte > hematopoietic and immune system cell > Cell type	splenic NK T-cell (unspecified)	Synonym: Natural killer T-cell from the spleen, not further specified.	14	2.08658	0.20313	2.27189	0.624107	1.55282	2.70522	3.08149
cerebellum microglia cell > metencephalon microglia cell > hindbrain microglia cell > brain microglia cell > microglia cell > glia cell > central nervous system cell > nervous system cell > Cell type	cerebellum microglia cell		8	2.19401	0.265764	2.26891	1.10638	1.75787	3.04052	3.13191
brain macrophage > macrophage > myeloid leukocyte > leukocyte > hematopoietic and immune system cell > Cell type	brain macrophage		6	2.21105	0.18115	2.26259	2.16296	2.16296	2.40205	2.40205
embryonic brain macrophage > embryonic macrophage > embryonic myeloid leukocyte > embryonic leukocyte > embryonic hematopoietic and immune system cell > embryonic cell > gestational structure cell > Cell type	embryonic brain macrophage		2	2.24213	0.0212842	2.24213	2.22084	2.22084	2.26341	2.26341
splenic CD8 memory precursor T-cell > CD8 memory precursor T-cell > CD8 T-cell > T-cell > T-cell lineage > lymphocyte > lymphoid leukocyte > leukocyte > hematopoietic and immune system cell > Cell type	splenic CD8 memory precursor T-cell		4	2.23748	0.0817241	2.23737	2.09574	2.09613	2.37945	2.37945
splenic CD8 cytotoxic T-cell (unspecified) > CD8 cytotoxic T-cell (unspecified) > CD8 cytotoxic T-cell > CD8 T-cell > T-cell > T-cell lineage > lymphocyte > lymphoid leukocyte > leukocyte > hematopoietic and immune system cell > Cell type	splenic CD8 cytotoxic T-cell (unspecified)		10	2.14498	0.117624	2.2231	1.61133	1.75	2.47723	2.55348
splenic type I NK T-cell > type I NK T-cell > NK T-cell > T-cell > T-cell lineage > lymphocyte > lymphoid leukocyte > leukocyte > hematopoietic and immune system cell > Cell type	splenic type I NK T-cell	Synonyms: splenic invariant natural killer T cell, splenic classical NK T cell. An alpha-beta T cell expressing NK cell markers that is CD1d restricted and expresses specific V-alpha chains. NK T cells of this type typically recognize the glycolipid alpha-galactosylceramide presented by CD1d.	9	1.92553	0.201488	2.22153	0.762987	1.62925	2.34829	2.59743
splenic T2 B-cell > T2 B-cell > transitional stage B-cell > B-cell > B-cell lineage > lymphocyte > lymphoid leukocyte > leukocyte > hematopoietic and immune system cell > Cell type	splenic T2 B-cell	Synonym: Splenic transitional stage 2 B-cell. A transitional stage B-cell that is typically described as surface IgM-high, surface IgD-positive, CD21-positive, CD23-positive, CD62L-negative, CD93-positive and is located in the splenic B follicles. This cell type has also been described as IgM-high, CD19-positive, B220-positive, AA4-positive, and CD23-positive.	2	2.17399	0.228375	2.17399	1.94561	1.94561	2.40236	2.40236
splenic CD8 memory T-cell (unspecified) > CD8 memory T-cell (unspecified) > CD8 memory T-cell > CD8 T-cell > T-cell > T-cell lineage > lymphocyte > lymphoid leukocyte > leukocyte > hematopoietic and immune system cell > Cell type	splenic CD8 memory T-cell (unspecified)		3	2.1642	0.0801219	2.17107	2.02212	2.02212	2.29941	2.29941
bone marrow common lymphoid progenitor (CLP) cell > bone marrow hematopoietic stem / progenitor cell > hematopoietic stem / progenitor cell > hematopoietic and immune system cell > Cell type	bone marrow common lymphoid progenitor (CLP) cell		2	2.16341	0.832936	2.16341	1.33047	1.33047	2.99635	2.99635
embryonic hepatic macrophage precursor > embryonic macrophage precursor > embryonic myeloid leukocyte > embryonic leukocyte > embryonic hematopoietic and immune system cell > embryonic cell > gestational structure cell > Cell type	embryonic hepatic macrophage precursor		1	2.15583	NaN	2.15583	2.15583	2.15583	2.15583	2.15583
small intestinal group 3 innate lymphoid cell > group 3 innate lymphoid cell > innate lymphoid cell > lymphoid leukocyte > leukocyte > hematopoietic and immune system cell > Cell type	small intestinal group 3 innate lymphoid cell	An innate lymphoid cell that expresses RORgt and is capable of expressing IL17A and/or IL-22, isolated from the small intestine.	9	1.30683	0.38192	2.122	0.0518098	0.0572031	2.25662	2.52397
embryonic liver hematopoietic stem-progenitor cell > embryonic liver cell > embryonic cell > gestational structure cell > Cell type	embryonic liver hematopoietic stem-progenitor cell		2	2.11284	1.49061	2.11284	0.622234	0.622234	3.60345	3.60345
splenic T3 B-cell > T3 B-cell > transitional stage B-cell > B-cell > B-cell lineage > lymphocyte > lymphoid leukocyte > leukocyte > hematopoietic and immune system cell > Cell type	splenic T3 B-cell	Synonym: splenic transitional stage 3 B-cell. A splenic transitional stage B-cell that is typically described as expressing surface IgM, IgD and CD62L. It has also been described as IgM-positive, CD19-positive, B220-positive, AA4-positive, and CD23-positive.	1	2.09274	NaN	2.09274	2.09274	2.09274	2.09274	2.09274
fraction E newly formed (immature) B-cell > newly formed (immature) B-cell > B-cell > B-cell lineage > lymphocyte > lymphoid leukocyte > leukocyte > hematopoietic and immune system cell > Cell type	fraction E newly formed (immature) B-cell	Markers associated with mouse cells. An immature B-cell that is typically described as IgM-positive, CD45R-positive, CD43-low, CD25-negative, and CD127-negative. This cell type has also been described as being AA4-positive, IgM-positive, CD19-positive, CD43-low/negative, and HSA-positive.	2	2.07441	0.459125	2.07441	1.61529	1.61529	2.53354	2.53354
CD4 naive T-cell > CD4 T-cell > T-cell > T-cell lineage > lymphocyte > lymphoid leukocyte > leukocyte > hematopoietic and immune system cell > Cell type	CD4 naive T-cell		6	2.05328	0.0577221	2.06148	1.84796	1.94921	2.18547	2.2141
splenic CD8 effector memory T-cell > CD8 effector memory T-cell > CD8 memory T-cell > CD8 T-cell > T-cell > T-cell lineage > lymphocyte > lymphoid leukocyte > leukocyte > hematopoietic and immune system cell > Cell type	splenic CD8 effector memory T-cell		1	2.05599	NaN	2.05599	2.05599	2.05599	2.05599	2.05599
brainstem microglia cell > brain microglia cell > microglia cell > glia cell > central nervous system cell > nervous system cell > Cell type	brainstem microglia cell		3	1.55843	0.53681	2.04121	0.48657	0.48657	2.14753	2.14753
splenic marginal zone B-cell > marginal zone B-cell > mature B-cell > B-cell > B-cell lineage > lymphocyte > lymphoid leukocyte > leukocyte > hematopoietic and immune system cell > Cell type	splenic marginal zone B-cell	A mature B-cell that is located in the marginal zone of the spleen. It is typically described as CD23-negative and CD21-positive and expressing a B-cell receptor usually reactive to bacterial cell wall components or senescent self components such as oxidized-LDL. This cell type has also been described as being CD19-positive, B220-positive, IgM-high, AA4-negative, CD35-high.	2	2.02984	0.0562127	2.02984	1.97363	1.97363	2.08605	2.08605
splenic CD8 naive T-cell > CD8 naive T-cell > CD8 T-cell > T-cell > T-cell lineage > lymphocyte > lymphoid leukocyte > leukocyte > hematopoietic and immune system cell > Cell type	splenic CD8 naive T-cell		14	2.0796	0.10301	2.02795	1.60118	1.84139	2.13991	2.13991
embryonic pulmonary macrophage > embryonic macrophage > embryonic myeloid leukocyte > embryonic leukocyte > embryonic hematopoietic and immune system cell > embryonic cell > gestational structure cell > Cell type	embryonic pulmonary macrophage		9	1.98089	0.282973	1.99768	1.7768	1.79361	2.52853	2.81783
intestinal intraepithelial CD8 tissue-resident memory precursor T-cell > CD8 tissue-resident memory precursor T-cell > CD8 T-cell > T-cell > T-cell lineage > lymphocyte > lymphoid leukocyte > leukocyte > hematopoietic and immune system cell > Cell type	intestinal intraepithelial CD8 tissue-resident memory precursor T-cell		1	1.98971	NaN	1.98971	1.98971	1.98971	1.98971	1.98971
embryonic heart macrophage > embryonic macrophage > embryonic myeloid leukocyte > embryonic leukocyte > embryonic hematopoietic and immune system cell > embryonic cell > gestational structure cell > Cell type	embryonic heart macrophage		2	1.98852	0.0078212	1.98852	1.98069	1.98069	1.99634	1.99634
double negative 3 (DN3) thymocyte > double negative thymocyte > thymocyte > T-cell lineage > lymphocyte > lymphoid leukocyte > leukocyte > hematopoietic and immune system cell > Cell type	double negative 3 (DN3) thymocyte	A thymocyte that is typically described as CD4-negative, CD8-negative, CD44-negative and CD25-positive.	2	1.98364	0.117809	1.98364	1.86583	1.86583	2.10145	2.10145
splenic gd T-cell (unspecified) > gamma-delta T-cell (unspecified) > gamma-delta T-cell > T-cell > T-cell lineage > lymphocyte > lymphoid leukocyte > leukocyte > hematopoietic and immune system cell > Cell type	splenic gd T-cell (unspecified)		24	1.81565	0.170398	1.94407	0.819392	1.50884	2.3737	3.3163
hypothalamus > diencephalon > forebrain (prosencephalon) > brain (encephalon) > central nervous system (CNS) > nervous system > Tissue	hypothalamus		14	1.8866	0.0474907	1.93592	1.85486	1.87291	1.99301	2.10115
lymph node gamma-delta T-cell (unspecified) > gamma-delta T-cell (unspecified) > gamma-delta T-cell > T-cell > T-cell lineage > lymphocyte > lymphoid leukocyte > leukocyte > hematopoietic and immune system cell > Cell type	lymph node gamma-delta T-cell (unspecified)		6	1.86284	0.271959	1.93401	0.883516	1.36948	2.28402	2.77199
diencephalon > forebrain (prosencephalon) > brain (encephalon) > central nervous system (CNS) > nervous system > Tissue	diencephalon		16	1.91065	0.0425534	1.92635	1.57284	1.80734	2.06173	2.11861
tumor derived CD4 T-cell (unspecified) > CD4 T-cell (unspecified) > CD4 T-cell > T-cell > T-cell lineage > lymphocyte > lymphoid leukocyte > leukocyte > hematopoietic and immune system cell > Cell type	tumor derived CD4 T-cell (unspecified)		8	1.98445	0.127759	1.89679	1.64204	1.77604	2.18477	2.75242
bone marrow natural killer cell > natural killer cell > group 1 innate lymphoid cell > innate lymphoid cell > lymphoid leukocyte > leukocyte > hematopoietic and immune system cell > Cell type	bone marrow natural killer cell		6	1.92228	0.119196	1.87008	1.60419	1.65843	2.24493	2.28598
embryonic hepatic macrophage > embryonic macrophage > embryonic myeloid leukocyte > embryonic leukocyte > embryonic hematopoietic and immune system cell > embryonic cell > gestational structure cell > Cell type	embryonic hepatic macrophage		11	2.11214	0.399991	1.86261	0	1.33189	2.74123	3.22765
splenic T1 B-cell > T1 B-cell > transitional stage B-cell > B-cell > B-cell lineage > lymphocyte > lymphoid leukocyte > leukocyte > hematopoietic and immune system cell > Cell type	splenic T1 B-cell	Synonym: splenic transitional stage 1 B-cell. A transitional stage B-cell that has migrated from the bone marrow to the spleen. This cell type is typically described as: surface IgM-high, surface IgD-negative, CD21-negative, CD23-negative, and CD62L-negative, and CD93-positive. This cell type has also been described as IgM-high, CD19-positive, B220-positive, AA4-positive, and CD23-negative.	1	1.85373	NaN	1.85373	1.85373	1.85373	1.85373	1.85373
pulmonary type I NK T-cell > type I NK T-cell > NK T-cell > T-cell > T-cell lineage > lymphocyte > lymphoid leukocyte > leukocyte > hematopoietic and immune system cell > Cell type	pulmonary type I NK T-cell		2	1.85146	0.0737491	1.85146	1.77771	1.77771	1.92521	1.92521
lumbar dorsal root ganglion neuron > dorsal root ganglion neuron > spinal ganglion cell > ganglion cell > peripheral nervous system cell > nervous system cell > Cell type	lumbar dorsal root ganglion neuron		28	1.73193	0.174288	1.83787	0	1.25941	2.60005	3.02425
embryonic renal macrophage > embryonic macrophage > embryonic myeloid leukocyte > embryonic leukocyte > embryonic hematopoietic and immune system cell > embryonic cell > gestational structure cell > Cell type	embryonic renal macrophage		11	1.88296	0.387646	1.83453	1.42885	1.42885	2.23298	2.81941
embryonic skin macrophage precursor > embryonic macrophage precursor > embryonic myeloid leukocyte > embryonic leukocyte > embryonic hematopoietic and immune system cell > embryonic cell > gestational structure cell > Cell type	embryonic skin macrophage precursor		4	1.89164	0.712285	1.82434	0.356915	1.13981	3.56095	3.56095
small intestinal group 2 innate lymphoid cell > group 2 innate lymphoid cell > innate lymphoid cell > lymphoid leukocyte > leukocyte > hematopoietic and immune system cell > Cell type	small intestinal group 2 innate lymphoid cell	An innate lymphoid cell that is capable of producing T-helper 2-cell associated cytokines upon stimulation, isolated from the small intestine.	4	1.74792	0.274336	1.81701	1.01443	1.79301	2.34325	2.34325
embryonic thymic macrophage > embryonic macrophage > embryonic myeloid leukocyte > embryonic leukocyte > embryonic hematopoietic and immune system cell > embryonic cell > gestational structure cell > Cell type	embryonic thymic macrophage		3	1.76403	0.115364	1.81327	1.54419	1.54419	1.93462	1.93462
embryonic brain macrophage precursor > embryonic macrophage precursor > embryonic myeloid leukocyte > embryonic leukocyte > embryonic hematopoietic and immune system cell > embryonic cell > gestational structure cell > Cell type	embryonic brain macrophage precursor		5	1.7333	0.251042	1.80314	0.940494	1.4594	2.06573	2.39775
splenic CD8 T-cell (unspecified) > CD8 T-cell (unspecified) > CD8 T-cell > T-cell > T-cell lineage > lymphocyte > lymphoid leukocyte > leukocyte > hematopoietic and immune system cell > Cell type	splenic CD8 T-cell (unspecified)		48	1.65149	0.103177	1.77757	0.0164162	1.03014	2.2837	2.80358
hepatic I NK T-cell > type I NK T-cell > NK T-cell > T-cell > T-cell lineage > lymphocyte > lymphoid leukocyte > leukocyte > hematopoietic and immune system cell > Cell type	hepatic I NK T-cell		3	1.88622	0.152453	1.77453	1.69636	1.69636	2.18776	2.18776
splenic CD4 T-cell (unspecified) > CD4 T-cell (unspecified) > CD4 T-cell > T-cell > T-cell lineage > lymphocyte > lymphoid leukocyte > leukocyte > hematopoietic and immune system cell > Cell type	splenic CD4 T-cell (unspecified)		26	1.63741	0.118212	1.76602	0.555691	1.0819	1.96735	2.98356
thymic type I NK T-cell > type I NK T-cell > NK T-cell > T-cell > T-cell lineage > lymphocyte > lymphoid leukocyte > leukocyte > hematopoietic and immune system cell > Cell type	thymic type I NK T-cell		3	1.92638	0.207084	1.74605	1.69365	1.69365	2.33944	2.33944
embryonic macrophage > embryonic myeloid leukocyte > embryonic leukocyte > embryonic hematopoietic and immune system cell > embryonic cell > gestational structure cell > Cell type	embryonic macrophage		2	1.7299	0.417395	1.7299	1.3125	1.3125	2.14729	2.14729
lymph node CD8 T-cell (unspecified) > CD8 T-cell (unspecified) > CD8 T-cell > T-cell > T-cell lineage > lymphocyte > lymphoid leukocyte > leukocyte > hematopoietic and immune system cell > Cell type	lymph node CD8 T-cell (unspecified)		12	1.59768	0.10326	1.70813	0.972421	1.45925	1.79985	2.19043
embryonic colonic macrophage > embryonic macrophage > embryonic myeloid leukocyte > embryonic leukocyte > embryonic hematopoietic and immune system cell > embryonic cell > gestational structure cell > Cell type	embryonic colonic macrophage		2	1.70182	0.104622	1.70182	1.5972	1.5972	1.80644	1.80644
splenic CD8 central memory T-cell > CD8 central memory T-cell > CD8 memory T-cell > CD8 T-cell > T-cell > T-cell lineage > lymphocyte > lymphoid leukocyte > leukocyte > hematopoietic and immune system cell > Cell type	splenic CD8 central memory T-cell		2	1.68651	0.115831	1.68651	1.57068	1.57068	1.80234	1.80234
embryonic skin macrophage > embryonic macrophage > embryonic myeloid leukocyte > embryonic leukocyte > embryonic hematopoietic and immune system cell > embryonic cell > gestational structure cell > Cell type	embryonic skin macrophage		12	1.53013	0.367907	1.68527	0	0.454842	2.75229	3.40167
splenic natural killer cell > natural killer cell > group 1 innate lymphoid cell > innate lymphoid cell > lymphoid leukocyte > leukocyte > hematopoietic and immune system cell > Cell type	splenic natural killer cell		37	1.6924	0.0993902	1.6813	0.61083	1.29622	2.16218	2.98415
tumor derived CD4 regulatory T-cell (unspecified) > CD4 regulatory T-cell (unspecified) > CD4 regulatory T-cell > CD4 T-cell > T-cell > T-cell lineage > lymphocyte > lymphoid leukocyte > leukocyte > hematopoietic and immune system cell > Cell type	tumor derived CD4 regulatory T-cell (unspecified)		28	1.66063	0.162367	1.658	0.0973849	1.13013	2.1557	3.37969
intestinal intraepithelial CD8 T-cell (unspecified) > CD8 T-cell (unspecified) > CD8 T-cell > T-cell > T-cell lineage > lymphocyte > lymphoid leukocyte > leukocyte > hematopoietic and immune system cell > Cell type	intestinal intraepithelial CD8 T-cell (unspecified)		2	1.6478	0.342094	1.6478	1.30571	1.30571	1.98989	1.98989
immature single positive thymocyte > thymocyte > T-cell lineage > lymphocyte > lymphoid leukocyte > leukocyte > hematopoietic and immune system cell > Cell type	immature single positive thymocyte	A thymocyte that is typically described as CD4-negative, CD8-positive, CD44-negative, CD25-negative, and pre-TCR-positive. This stage comes between the double negative 4 (DN4) and double positive stages.	2	1.63215	0.206257	1.63215	1.4259	1.4259	1.83841	1.83841
splenic basophil granulocyte > basophil granulocyte > granulocyte (polymorphonuclear leukocyte) > myeloid leukocyte > leukocyte > hematopoietic and immune system cell > Cell type	splenic basophil granulocyte		3	1.34891	0.374982	1.59612	0.612119	0.612119	1.8385	1.8385
double negative 2a (DN2a) thymocyte > double negative 2 (DN2) thymocyte > double negative thymocyte > thymocyte > T-cell lineage > lymphocyte > lymphoid leukocyte > leukocyte > hematopoietic and immune system cell > Cell type	double negative 2a (DN2a) thymocyte	A thymocyte that is typically described as CD4-negative, CD8-negative, CD44-positive, and CD25-positive and CD117 (Kit)-high. Observed in mice.	1	1.59123	NaN	1.59123	1.59123	1.59123	1.59123	1.59123
splenic CD4 regulatory T-cell (unspecified) > CD4 regulatory T-cell (unspecified) > CD4 regulatory T-cell > CD4 T-cell > T-cell > T-cell lineage > lymphocyte > lymphoid leukocyte > leukocyte > hematopoietic and immune system cell > Cell type	splenic CD4 regulatory T-cell (unspecified)		16	1.59016	0.161699	1.59104	1.11372	1.3105	2.01307	2.89258
double negative 1 (DN1) thymocyte > double negative thymocyte > thymocyte > T-cell lineage > lymphocyte > lymphoid leukocyte > leukocyte > hematopoietic and immune system cell > Cell type	double negative 1 (DN1) thymocyte	An early T-lineage precursor that is typically described as CD4-negative, CD8-negative, CD44-positive, and CD25-negative and CD117 (Kit)-positive.	2	1.5457	0.0416169	1.5457	1.50408	1.50408	1.58731	1.58731
splenic B-cell (unspecified) > B-cell (unspecified) > B-cell > B-cell lineage > lymphocyte > lymphoid leukocyte > leukocyte > hematopoietic and immune system cell > Cell type	splenic B-cell (unspecified)		38	1.50747	0.0811294	1.52613	0.469689	1.22137	1.80275	2.55613
heart mast cell > mast cell > myeloid leukocyte > leukocyte > hematopoietic and immune system cell > Cell type	heart mast cell		2	1.52178	0.0728406	1.52178	1.44894	1.44894	1.59462	1.59462
cardiac fibroblast > heart cell > cardiovascular system cell > circulatory system cell > Cell type	cardiac fibroblast		22	1.36685	0.136769	1.50456	1.2618	1.42876	1.68699	2.06462
embryonic lens > embryonic eye > embryonic sensory organ system > embryo > embryonic tissue / fluid > gestational structure > Tissue	embryonic lens		3	1.56964	0.183638	1.47861	1.30702	1.30702	1.92331	1.92331
splenic CD4 naive T-cell > CD4 naive T-cell > CD4 T-cell > T-cell > T-cell lineage > lymphocyte > lymphoid leukocyte > leukocyte > hematopoietic and immune system cell > Cell type	splenic CD4 naive T-cell		26	1.54723	0.0963904	1.47203	0.635303	1.28993	1.90752	2.43283
colonic CD4 regulatory T-cell (unspecified) > CD4 regulatory T-cell (unspecified) > CD4 regulatory T-cell > CD4 T-cell > T-cell > T-cell lineage > lymphocyte > lymphoid leukocyte > leukocyte > hematopoietic and immune system cell > Cell type	colonic CD4 regulatory T-cell (unspecified)		2	1.47073	0.0266833	1.47073	1.44404	1.44404	1.49741	1.49741
intraabdominal adipose tissue (abdominal visceral adipose tissue) > abdominal adipose tissue > adipose tissue (fat) > connective tissue > Tissue	intraabdominal adipose tissue (abdominal visceral adipose tissue)		16	1.32609	0.0881835	1.44673	0.904697	1.26037	1.56199	1.739
patellar tendon cell (unspecified) > tendon cell > musculoskeletal system cell > Cell type	patellar tendon cell (unspecified)		3	1.43073	0.323352	1.43973	0.866215	0.866215	1.98623	1.98623
splenic CD4 activated T-cell (unspecified) > splenic CD4 T-cell (unspecified) > CD4 T-cell (unspecified) > CD4 T-cell > T-cell > T-cell lineage > lymphocyte > lymphoid leukocyte > leukocyte > hematopoietic and immune system cell > Cell type	splenic CD4 activated T-cell (unspecified)		14	1.50636	0.0960131	1.43017	1.14636	1.30067	1.52438	1.56762
peritoneal macrophage > macrophage > myeloid leukocyte > leukocyte > hematopoietic and immune system cell > Cell type	peritoneal macrophage		141	1.35197	0.043502	1.42494	0	0.993249	1.73131	2.54858
embryonic peritoneal macrophage > embryonic macrophage > embryonic myeloid leukocyte > embryonic leukocyte > embryonic hematopoietic and immune system cell > embryonic cell > gestational structure cell > Cell type	embryonic peritoneal macrophage		10	1.35411	0.0958753	1.40403	0.84737	1.01776	1.59325	1.71353
CD8 naive T-cell > CD8 T-cell > T-cell > T-cell lineage > lymphocyte > lymphoid leukocyte > leukocyte > hematopoietic and immune system cell > Cell type	CD8 naive T-cell		6	1.41293	0.170809	1.3979	0.832503	1.122	1.72595	2.0013
splenic CD8 activated T-cell (unspecified) > splenic CD8 T-cell (unspecified) > CD8 T-cell (unspecified) > CD8 T-cell > T-cell > T-cell lineage > lymphocyte > lymphoid leukocyte > leukocyte > hematopoietic and immune system cell > Cell type	splenic CD8 activated T-cell (unspecified)		12	1.38644	0.048032	1.38737	1.19169	1.34222	1.53319	1.62801
peritoneal cavity B-1a cell > B-1a cell > B-1 cell > mature B-cell > B-cell > B-cell lineage > lymphocyte > lymphoid leukocyte > leukocyte > hematopoietic and immune system cell > Cell type	peritoneal cavity B-1a cell	Synonym: peritoneal cavity B1a B-cell. A peritoneal cavity B-1 B-cell that has the phenotype CD5-positive.	14	1.28931	0.212783	1.34882	0	0.747726	1.80642	2.69467
CD8 activated T-cell (unspecified) > CD8 T-cell (unspecified) > CD8 T-cell > T-cell > T-cell lineage > lymphocyte > lymphoid leukocyte > leukocyte > hematopoietic and immune system cell > Cell type	CD8 activated T-cell (unspecified)		12	1.3336	0.144292	1.33692	0.637832	0.932436	1.73154	2.10744
mesangial cell > glomerulus cell > renal corpuscle cell > nephron cell > kidney cell > urinary system cell > Cell type	mesangial cell		11	1.12284	0.137148	1.32979	0.127115	0.721264	1.39836	1.64313
adrenal gland > endocrine system (except testis and ovary) > Tissue	adrenal gland		8	1.32213	0.0688584	1.31033	1.00775	1.21349	1.51225	1.62922
yolk sac macrophage > yolk sac cell > extraembryonic cell > gestational structure cell > Cell type	yolk sac macrophage		9	1.49753	0.461986	1.30857	0	0.0815748	2.31885	4.12007
brainstem > brain (encephalon) > central nervous system (CNS) > nervous system > Tissue	brainstem		18	1.31465	0.0369692	1.30839	1.07216	1.17427	1.42367	1.67454
spinal cord microglia cell > microglia cell > glia cell > central nervous system cell > nervous system cell > Cell type	spinal cord microglia cell		106	1.4034	0.0647092	1.281	0.164239	1.02663	1.69686	2.6612
peritoneal small macrophage > peritoneal macrophage > macrophage > myeloid leukocyte > leukocyte > hematopoietic and immune system cell > Cell type	peritoneal small macrophage		2	1.25481	0.215755	1.25481	1.03905	1.03905	1.47057	1.47057
hepatic plasmacytoid dendritic cell > plasmacytoid dendritic cell > dendritic cell > leukocyte > hematopoietic and immune system cell > Cell type	hepatic plasmacytoid dendritic cell	Synonyms: hepatic lymphoid dendritic cell, hepatic interferon-producing dendritic cell. A dendritic cell type of distinct morphology, localization, and surface marker expression from other dendritic cell types and associated with early stage immune responses, particularly the release of physiologically abundant amounts of type I interferons in response to infection.	4	1.44207	0.256584	1.25222	1.08343	1.10356	2.18039	2.18039
double negative 4 (DN4) thymocyte > double negative thymocyte > thymocyte > T-cell lineage > lymphocyte > lymphoid leukocyte > leukocyte > hematopoietic and immune system cell > Cell type	double negative 4 (DN4) thymocyte	A thymocyte is typically described as CD4-negative, CD8-negative, CD44-negative and CD25-negative and CD28-positive.	2	1.24625	0.257577	1.24625	0.98867	0.98867	1.50382	1.50382
lymph node CD4 helper T-cell (unspecified) > CD4 helper T-cell (unspecified) > CD4 helper T-cell > CD4 T-cell > T-cell > T-cell lineage > lymphocyte > lymphoid leukocyte > leukocyte > hematopoietic and immune system cell > Cell type	lymph node CD4 helper T-cell (unspecified)		3	1.124	0.176569	1.22394	0.780705	0.780705	1.36735	1.36735
embryonic hepatic hematopoietic stem / progenitor cell > embryonic hematopoietic stem / progenitor cell > embryonic hematopoietic and immune system cell > embryonic cell > gestational structure cell > Cell type	embryonic hepatic hematopoietic stem / progenitor cell		6	1.23461	0.0383367	1.22024	1.11102	1.1697	1.32802	1.35844
thymic macrophage > macrophage > myeloid leukocyte > leukocyte > hematopoietic and immune system cell > Cell type	thymic macrophage		4	1.27408	0.20744	1.21127	0.83703	1.19063	1.83677	1.83677
lamina propria CD4 T-cell (unspecified) > CD4 T-cell (unspecified) > CD4 T-cell > T-cell > T-cell lineage > lymphocyte > lymphoid leukocyte > leukocyte > hematopoietic and immune system cell > Cell type	lamina propria CD4 T-cell (unspecified)		8	1.24045	0.0640789	1.17318	1.06153	1.10024	1.44864	1.53938
tumor derived CD8 exhausted T-cell (unspecified) > tumor derived CD8 T-cell (unspecified) > CD8 T-cell (unspecified) > CD8 T-cell > T-cell > T-cell lineage > lymphocyte > lymphoid leukocyte > leukocyte > hematopoietic and immune system cell > Cell type	tumor derived CD8 exhausted T-cell (unspecified)		92	1.1572	0.0459372	1.16896	0.154628	0.940544	1.4914	2.17108
splenic macrophage > macrophage > myeloid leukocyte > leukocyte > hematopoietic and immune system cell > Cell type	splenic macrophage		20	1.06704	0.103027	1.16816	0.226093	0.81869	1.45598	1.79709
hematopoietic stem / progenitor cell > hematopoietic and immune system cell > Cell type	hematopoietic stem / progenitor cell		4	1.17431	0.214609	1.14921	0.763968	0.856869	1.63488	1.63488
peritoneal cavity B-1b cell > B-1B-cell > B-1 cell > mature B-cell > B-cell > B-cell lineage > lymphocyte > lymphoid leukocyte > leukocyte > hematopoietic and immune system cell > Cell type	peritoneal cavity B-1b cell	Synonym: peritoneal cavity B1b B-cell. A peritoneal cavity B-1 B-cell that has the phenotype CD5-negative, but having other phenotypic attributes of a B-1 B-cell (CD43-positive, IgM-high).	2	1.14916	0.226451	1.14916	0.922706	0.922706	1.37561	1.37561
cerebral cortex pre-myelinating oligodendrocyte > telencephalon pre-myelinating oligodendrocyte > forebrain pre-myelinating oligodendrocyte > brain pre-myelinating oligodendrocyte > pre-myelinating oligodendrocyte > oligodendrocyte > glia cell > central nervous system cell > nervous system cell > Cell type	cerebral cortex pre-myelinating oligodendrocyte		2	1.1407	0.264436	1.1407	0.876267	0.876267	1.40514	1.40514
tumor derived microglia cell > microglia cell > glia cell > central nervous system cell > nervous system cell > Cell type	tumor derived microglia cell		10	1.43268	0.185936	1.13018	0.893118	0.94326	1.94637	2.61665
peripheral blood monocyte > monocyte > myeloid leukocyte > leukocyte > hematopoietic and immune system cell > Cell type	peripheral blood monocyte		29	1.11786	0.0880725	1.1275	0.41922	0.773626	1.43798	2.00279
lymph node CD4 regulatory T-cell (unspecified) > CD4 regulatory T-cell (unspecified) > CD4 regulatory T-cell > CD4 T-cell > T-cell > T-cell lineage > lymphocyte > lymphoid leukocyte > leukocyte > hematopoietic and immune system cell > Cell type	lymph node CD4 regulatory T-cell (unspecified)		38	1.20933	0.143093	1.12301	0.0609624	0.525246	1.67296	3.00871
hepatic monocyte > monocyte > myeloid leukocyte > leukocyte > hematopoietic and immune system cell > Cell type	hepatic monocyte		16	1.13529	0.104335	1.11894	0.422876	0.802228	1.59617	1.78645
splenic CD8 exhausted T-cell (unspecified) > splenic CD8 T-cell (unspecified) > CD8 T-cell (unspecified) > CD8 T-cell > T-cell > T-cell lineage > lymphocyte > lymphoid leukocyte > leukocyte > hematopoietic and immune system cell > Cell type	splenic CD8 exhausted T-cell (unspecified)		4	1.28356	0.207467	1.11035	1.01992	1.02422	1.89361	1.89361
alveolar macrophage > pulmonary macrophage > macrophage > myeloid leukocyte > leukocyte > hematopoietic and immune system cell > Cell type	alveolar macrophage		9	0.970983	0.17327	1.10888	1.04813	1.04813	1.21634	1.21634
adipose tissue macrophage > macrophage > myeloid leukocyte > leukocyte > hematopoietic and immune system cell > Cell type	adipose tissue macrophage		2	1.10824	0.564637	1.10824	0.543605	0.543605	1.67288	1.67288
white adipose tissue (white fat,WAT) > adipose tissue (fat) > connective tissue > Tissue	white adipose tissue (white fat,WAT)		8	1.08457	0.196899	1.10732	0.231715	0.8784	1.65401	1.66658
inguinal adipose tissue macrophage > adipose tissue macrophage > macrophage > myeloid leukocyte > leukocyte > hematopoietic and immune system cell > Cell type	inguinal adipose tissue macrophage		3	1.17131	0.133608	1.10594	0.97961	0.97961	1.42838	1.42838
pulmonary macrophage > macrophage > myeloid leukocyte > leukocyte > hematopoietic and immune system cell > Cell type	pulmonary macrophage		42	1.08525	0.0809079	1.1058	0	0.729654	1.45608	2.09205
hippocampus > temporal lobe > cerebral cortex lobe / region > cerebral cortex (neopallium) > cerebral hemisphere > telencephalon (cerebrum) > forebrain (prosencephalon) > brain (encephalon) > central nervous system (CNS) > nervous system > Tissue	hippocampus		290	1.03413	0.0178868	1.1051	0.411951	0.899769	1.22621	1.66219
aortic macrophage > macrophage > myeloid leukocyte > leukocyte > hematopoietic and immune system cell > Cell type	aortic macrophage		9	0.859155	0.135499	1.09714	0.257488	0.402159	1.14287	1.24211
splenic plasmacytoid dendritic cell > plasmacytoid dendritic cell > dendritic cell > leukocyte > hematopoietic and immune system cell > Cell type	splenic plasmacytoid dendritic cell	Synonyms: splenic lymphoid dendritic cell, splenic interferon-producing dendritic cell. A dendritic cell type of distinct morphology, localization, and surface marker expression from other dendritic cell types and associated with early stage immune responses, particularly the release of physiologically abundant amounts of type I interferons in response to infection.	8	0.882539	0.178624	1.09186	0.159235	0.464454	1.25231	1.56553
lumbar spinal ganglion (dorsal root ganglion) > spinal ganglion (dorsal root ganglion) > peripheral nervous system (PNS) > nervous system > Tissue	lumbar spinal ganglion (dorsal root ganglion)		40	1.17812	0.0995411	1.08377	0.0347043	0.790981	1.74424	2.27527
pulmonary monocyte > monocyte > myeloid leukocyte > leukocyte > hematopoietic and immune system cell > Cell type	pulmonary monocyte		16	0.921138	0.0917752	1.07805	0.226331	0.637024	1.21451	1.35778
renal CD8 T-cell (unspecified) > CD8 T-cell (unspecified) > CD8 T-cell > T-cell > T-cell lineage > lymphocyte > lymphoid leukocyte > leukocyte > hematopoietic and immune system cell > Cell type	renal CD8 T-cell (unspecified)		3	0.960703	0.219332	1.07615	0.536479	0.536479	1.26948	1.26948
hippocampus microglia cell > temporal lobe microglia cell > cerebral cortex microglia cell > telencephalon microglia cell > forebrain microglia cell > brain microglia cell > microglia cell > glia cell > central nervous system cell > nervous system cell > Cell type	hippocampus microglia cell		10	1.31446	0.358826	1.07223	0	0.474548	1.90702	3.28226
macrophage-like cell > macrophage > myeloid leukocyte > leukocyte > hematopoietic and immune system cell > Cell type	macrophage-like cell		6	1.06536	0.0658997	1.06928	1.00317	1.00317	1.08719	1.08719
brain microvessel > microvessel > blood vessel > vascular system > cardiovascular system > circulatory system > Tissue	brain microvessel		3	1.14888	0.216072	1.06731	0.82214	0.82214	1.55718	1.55718
cerebral cortex oligodendrocyte progenitor cell > telencephalon oligodendrocyte progenitor cell > forebrain oligodendrocyte progenitor cell > brain oligodendrocyte progenitor cell > oligodendrocyte progenitor cell > glia cell > central nervous system cell > nervous system cell > Cell type	cerebral cortex oligodendrocyte progenitor cell		2	1.05021	0.357408	1.05021	0.692801	0.692801	1.40762	1.40762
brain pericyte > blood vessel pericyte > vascular pericyte > blood vessel cell > vascular system cell > cardiovascular system cell > circulatory system cell > Cell type	brain pericyte		3	1.01156	0.356672	1.04247	0.378909	0.378909	1.6133	1.6133
bone marrow long term stem cell > bone marrow hematopoietic stem cell > bone marrow hematopoietic stem / progenitor cell > hematopoietic stem / progenitor cell > hematopoietic and immune system cell > Cell type	bone marrow long term stem cell		4	0.978415	0.420301	1.04155	0.0943957	0.426654	1.73616	1.73616
pulmonary (lung) epithelium cell > pulmonary (lung) mucosa cell > lung cell > respiratory system cell > Cell type	pulmonary (lung) epithelium cell	----	11	1.23541	0.267813	1.04103	0	0.608316	1.73824	3.24062
breast (mammary gland) epithelium cell > breast (mammary gland) cell > trunk cell > other body part cell > Cell type	breast (mammary gland) epithelium cell		12	0.920908	0.103546	1.02506	0.304787	0.683897	1.21394	1.34133
tumor derived T-cell (unspecified) > T-cell (unspecified) > T-cell > T-cell lineage > lymphocyte > lymphoid leukocyte > leukocyte > hematopoietic and immune system cell > Cell type	tumor derived T-cell (unspecified)		10	1.02394	0.319799	1.02237	0	0	2.05957	2.59947
striatum > corpus striatum > basal ganglia > cerebral hemisphere > telencephalon (cerebrum) > forebrain (prosencephalon) > brain (encephalon) > central nervous system (CNS) > nervous system > Tissue	striatum		232	1.03274	0.0164611	0.995413	0.487568	0.899029	1.18786	1.6172
renal CD4 T-cell (unspecified) > CD4 T-cell (unspecified) > CD4 T-cell > T-cell > T-cell lineage > lymphocyte > lymphoid leukocyte > leukocyte > hematopoietic and immune system cell > Cell type	renal CD4 T-cell (unspecified)		3	0.992979	0.115809	0.994663	0.791554	0.791554	1.19272	1.19272
embryonic microglia cell > embryonic glia cell > embryonic central nervous system cell > embryonic nervous system cell > embryonic cell > gestational structure cell > Cell type	embryonic microglia cell		19	1.27443	0.196078	0.987167	0.0869938	0.704563	2.15321	2.93776
tendon cell > musculoskeletal system cell > Cell type	tendon cell		20	1.01744	0.0451839	0.987011	0.670358	0.90986	1.13717	1.41228
bone marrow derived macrophage > macrophage > myeloid leukocyte > leukocyte > hematopoietic and immune system cell > Cell type	bone marrow derived macrophage	Macrophage derived from bone marrow cells in vitro in the presence of growth factors.	359	0.885296	0.0191979	0.963591	0.0744683	0.695016	1.10952	1.61782
bone marrow conventional dendritic cell > conventional dendritic cell > dendritic cell > leukocyte > hematopoietic and immune system cell > Cell type	bone marrow conventional dendritic cell		9	0.987146	0.150208	0.956472	0.371583	0.686233	1.16881	1.80752
subcutaneous lymph node pericyte > lymph node pericyte > blood vessel pericyte > vascular pericyte > blood vessel cell > vascular system cell > cardiovascular system cell > circulatory system cell > Cell type	subcutaneous lymph node pericyte		2	0.940067	0.395799	0.940067	0.544267	0.544267	1.33587	1.33587
microglia cell > glia cell > central nervous system cell > nervous system cell > Cell type	microglia cell		15	0.836569	0.0851139	0.934597	0.296482	0.5393	1.09656	1.50225
embryonic endocrine pancreatic cell > embryonic endocrine system (except testis and ovary) cell > embryonic cell > gestational structure cell > Cell type	embryonic endocrine pancreatic cell		18	0.949119	0.0718506	0.91299	0.518221	0.690582	1.16212	1.60414
renal macrophage > macrophage > myeloid leukocyte > leukocyte > hematopoietic and immune system cell > Cell type	renal macrophage		14	1.53996	0.406209	0.909983	0	0.68235	2.24594	3.90604
peripheral blood Th1 T-cell > Th1 T-cell > CD4 helper T-cell > CD4 T-cell > T-cell > T-cell lineage > lymphocyte > lymphoid leukocyte > leukocyte > hematopoietic and immune system cell > Cell type	peripheral blood Th1 T-cell		1	0.907736	NaN	0.907736	0.907736	0.907736	0.907736	0.907736
bone marrow short term stem cell > bone marrow hematopoietic stem cell > bone marrow hematopoietic stem / progenitor cell > hematopoietic stem / progenitor cell > hematopoietic and immune system cell > Cell type	bone marrow short term stem cell		2	0.906659	0.258346	0.906659	0.648313	0.648313	1.165	1.165
spinal ganglion (dorsal root ganglion) > peripheral nervous system (PNS) > nervous system > Tissue	spinal ganglion (dorsal root ganglion)		72	0.817914	0.036871	0.904938	0.288518	0.526676	1.02763	1.47376
ascending colon > proximal colonic mucosa > proximal colon > colon > colorectum > large intestine > intestine > gastrointestinal tract > alimentary system > Tissue	ascending colon		48	0.876127	0.0229696	0.897151	0.53286	0.776173	0.986648	1.25451
splenic eosinophil granulocyte > eosinophil granulocyte > granulocyte (polymorphonuclear leukocyte) > myeloid leukocyte > leukocyte > hematopoietic and immune system cell > Cell type	splenic eosinophil granulocyte		2	0.895028	0.608759	0.895028	0.286269	0.286269	1.50379	1.50379
tumor derived CD8 T-cell (unspecified) > CD8 T-cell (unspecified) > CD8 T-cell > T-cell > T-cell lineage > lymphocyte > lymphoid leukocyte > leukocyte > hematopoietic and immune system cell > Cell type	tumor derived CD8 T-cell (unspecified)		114	0.893019	0.0555756	0.892311	0	0.387017	1.32553	2.52948
medullary thymic epithelium cell > thymic medulla cell > thymic lobe cell > thymic epithelium cell > thymus cell > lymphoid tissue cell > hematopoietic and immune system cell > Cell type	medullary thymic epithelium cell		14	0.909012	0.116451	0.884281	0.364592	0.554952	1.19494	1.78083
corpus callosum > cerebral white matter > cerebral hemisphere > telencephalon (cerebrum) > forebrain (prosencephalon) > brain (encephalon) > central nervous system (CNS) > nervous system > Tissue	corpus callosum		16	0.873462	0.0252323	0.860057	0.700797	0.791639	0.944332	1.04878
splenic follicular B-cell > follicular B-cell > mature B-cell > B-cell > B-cell lineage > lymphocyte > lymphoid leukocyte > leukocyte > hematopoietic and immune system cell > Cell type	splenic follicular B-cell	A resting mature B-cell that is typically described as IgM-positive, IgD-positive, CD23-positive and CD21-positive, and found in the B-cell follicles of the white pulp of the spleen. This cell type is also described as being CD19-positive, B220-positive, AA4-negative, CD43-negative, and CD5-negative.	19	0.941194	0.0911234	0.859612	0.442937	0.622163	1.15467	1.76089
peritoneal cavity neutrophil granulocyte > neutrophil granulocyte > granulocyte (polymorphonuclear leukocyte) > myeloid leukocyte > leukocyte > hematopoietic and immune system cell > Cell type	peritoneal cavity neutrophil granulocyte		2	0.854649	0.520956	0.854649	0.333693	0.333693	1.3756	1.3756
splenic Th1 T-cell > Th1 T-cell > CD4 helper T-cell > CD4 T-cell > T-cell > T-cell lineage > lymphocyte > lymphoid leukocyte > leukocyte > hematopoietic and immune system cell > Cell type	splenic Th1 T-cell		4	0.870032	0.0552117	0.853492	0.768629	0.791585	1.00451	1.00451
splenic plasmablast > plasmablast > antibody-secreting cell > B-cell lineage > lymphocyte > lymphoid leukocyte > leukocyte > hematopoietic and immune system cell > Cell type	splenic plasmablast		2	0.850837	0.0653976	0.850837	0.78544	0.78544	0.916235	0.916235
spinal cord oligodendrocyte (unspecified) > oligodendrocyte (unspecified) > oligodendrocyte > glia cell > central nervous system cell > nervous system cell > Cell type	spinal cord oligodendrocyte (unspecified)		20	0.819352	0.0215825	0.849557	0.607905	0.756811	0.893757	0.967046
inguinal white adipose tissue > white adipose tissue (white fat,WAT) > adipose tissue (fat) > connective tissue > Tissue	inguinal white adipose tissue		8	0.88506	0.084637	0.847892	0.836501	0.836501	0.928679	0.928679
hepatic conventional dendritic cell > conventional dendritic cell > dendritic cell > leukocyte > hematopoietic and immune system cell > Cell type	hepatic conventional dendritic cell	Synonyms: hepatic classical dendritic cell, hepatic myeloid dendritic cell. Typically described as CD11c-high.	7	0.731521	0.120412	0.814984	0.234004	0.356184	0.941101	1.11699
pulmonary conventional dendritic cell > conventional dendritic cell > dendritic cell > leukocyte > hematopoietic and immune system cell > Cell type	pulmonary conventional dendritic cell	Synonyms: pulmonary classical dendritic cell, pulmonary myeloid dendritic cell. Typically described as CD11c-high.	6	0.789404	0.138181	0.810408	0.448929	0.449272	1.10158	1.11582
bone marrow plasma cell > plasma cell > antibody-secreting cell > B-cell lineage > lymphocyte > lymphoid leukocyte > leukocyte > hematopoietic and immune system cell > Cell type	bone marrow plasma cell	A terminally differentiated, post-mitotic, antibody secreting cell of the B-cell lineage typically described as CD138-positive, surface immunoglobulin-negative, and MHC Class II-negative isolated from the bone marrow.	1	0.807446	NaN	0.807446	0.807446	0.807446	0.807446	0.807446
cerebral cortex (neopallium) > cerebral hemisphere > telencephalon (cerebrum) > forebrain (prosencephalon) > brain (encephalon) > central nervous system (CNS) > nervous system > Tissue	cerebral cortex (neopallium)		272	0.751782	0.0193698	0.793719	0	0.475732	1.02138	1.55312
cranial bone > bone > skeletal system (except bone marrow) > musculoskeletal system > Tissue	cranial bone		1	0.789985	NaN	0.789985	0.789985	0.789985	0.789985	0.789985
synovial interstitial macrophage > macrophage > myeloid leukocyte > leukocyte > hematopoietic and immune system cell > Cell type	synovial interstitial macrophage		2	0.786183	0.0475862	0.786183	0.738597	0.738597	0.833769	0.833769
embryonic cerebral cortex (neopallium) > embryonic cerebral hemisphere > embryonic telencephalon (cerebrum) > embryonic forebrain (prosencephalon) > embryonic brain > embryo > embryonic tissue / fluid > gestational structure > Tissue	embryonic cerebral cortex (neopallium)		9	0.722377	0.0814881	0.781009	0.364199	0.46519	0.89795	1.06134
cerebral cortex myelinating oligodendrocyte > telencephalon myelinating oligodendrocyte > forebrain myelinating oligodendrocyte > brain myelinating oligodendrocyte > myelinating oligodendrocyte > oligodendrocyte > glia cell > central nervous system cell > nervous system cell > Cell type	cerebral cortex myelinating oligodendrocyte		2	0.766007	0.0384515	0.766007	0.727556	0.727556	0.804459	0.804459
gonadal adipose tissue > intraabdominal adipose tissue (abdominal visceral adipose tissue) > abdominal adipose tissue > adipose tissue (fat) > connective tissue > Tissue	gonadal adipose tissue		15	0.822057	0.0811402	0.756919	0.2926	0.58637	1.13283	1.33589
embryonic heart > embryo > embryonic tissue / fluid > gestational structure > Tissue	embryonic heart		15	0.658642	0.0850574	0.756652	0.0503392	0.520586	0.893766	1.05872
brain microglia cell > microglia cell > glia cell > central nervous system cell > nervous system cell > Cell type	brain microglia cell		62	1.11467	0.117198	0.753797	0	0.499664	1.74101	2.81198
thymic conventional dendritic cell > conventional dendritic cell > dendritic cell > leukocyte > hematopoietic and immune system cell > Cell type	thymic conventional dendritic cell	Synonyms: thymic classical dendritic cell, thymic myeloid dendritic cell. Typically described as CD11c-high.	8	0.70235	0.0948927	0.745023	0.337333	0.695317	0.974255	0.992453
splenic CD4 helper T-cell (unspecified) > CD4 helper T-cell (unspecified) > CD4 helper T-cell > CD4 T-cell > T-cell > T-cell lineage > lymphocyte > lymphoid leukocyte > leukocyte > hematopoietic and immune system cell > Cell type	splenic CD4 helper T-cell (unspecified)		9	0.61675	0.132762	0.735732	0.0514803	0.254567	0.91878	1.07708
embryonic splenic macrophage > embryonic macrophage > embryonic myeloid leukocyte > embryonic leukocyte > embryonic hematopoietic and immune system cell > embryonic cell > gestational structure cell > Cell type	embryonic splenic macrophage		2	0.724149	0.101164	0.724149	0.622985	0.622985	0.825313	0.825313
lumbar spinal cord dorsal horn > lumbar region of the spinal cord > spinal cord > central nervous system (CNS) > nervous system > Tissue	lumbar spinal cord dorsal horn		13	0.718255	0.122925	0.72276	0.128218	0.167413	1.04378	1.3861
joint > skeletal system (except bone marrow) > musculoskeletal system > Tissue	joint		116	0.82407	0.0295407	0.716894	0.332103	0.577332	1.13549	1.51891
mesenteric adipose tissue macrophage > adipose tissue macrophage > macrophage > myeloid leukocyte > leukocyte > hematopoietic and immune system cell > Cell type	mesenteric adipose tissue macrophage		4	0.805693	0.347935	0.707191	0.14656	0.342584	1.66183	1.66183
tumor derived endothelium cell > blood vessel endothelium cell > vascular endothelium cell > blood vessel cell > vascular system cell > cardiovascular system cell > circulatory system cell > Cell type	tumor derived endothelium cell		8	0.573525	0.172594	0.702376	0	0.0464141	1.1116	1.11712
hepatocyte > hepatic epithelium cell > hepatic mucosa cell > liver cell > liver and biliary system cell > alimentary system cell > Cell type	hepatocyte		12	0.722195	0.0581382	0.701265	0.38839	0.596709	0.971604	1.02333
CD4 activated T-cell (unspecified) > CD4 T-cell (unspecified) > CD4 T-cell > T-cell > T-cell lineage > lymphocyte > lymphoid leukocyte > leukocyte > hematopoietic and immune system cell > Cell type	CD4 activated T-cell (unspecified)		72	0.745121	0.0455267	0.700317	0	0.487551	0.967724	1.40036
brain endothelium cell > blood vessel endothelium cell > vascular endothelium cell > blood vessel cell > vascular system cell > cardiovascular system cell > circulatory system cell > Cell type	brain endothelium cell		2	0.676477	0.00741184	0.676477	0.669066	0.669066	0.683889	0.683889
Kupffer cell > hepatic macrophage > macrophage > myeloid leukocyte > leukocyte > hematopoietic and immune system cell > Cell type	Kupffer cell		40	0.798554	0.0759917	0.665933	0	0.447921	1.18066	1.74063
femur > upper leg bone > leg bone > bone > skeletal system (except bone marrow) > musculoskeletal system > Tissue	femur		12	0.623142	0.0389173	0.63905	0.410063	0.554146	0.705282	0.911374
embryonic palatal mesenchyme cell > embryonic head cell > embryonic cell > gestational structure cell > Cell type	embryonic palatal mesenchyme cell		19	0.592966	0.0498183	0.633166	0.23357	0.439658	0.746865	0.955264
lung cell > respiratory system cell > Cell type	lung cell	----	3	0.602533	0.0316173	0.63071	0.539419	0.539419	0.63747	0.63747
bone marrow endothelium cell > blood vessel endothelium cell > vascular endothelium cell > blood vessel cell > vascular system cell > cardiovascular system cell > circulatory system cell > Cell type	bone marrow endothelium cell		12	0.641355	0.0558621	0.625472	0.390651	0.528661	0.665372	0.665372
mediastinal lymph node conventional dendritic cell > lymph node conventional dendritic cell > conventional dendritic cell > dendritic cell > leukocyte > hematopoietic and immune system cell > Cell type	mediastinal lymph node conventional dendritic cell		6	0.782927	0.144094	0.625011	0.501752	0.50899	1.10057	1.33622
heart macrophage > macrophage > myeloid leukocyte > leukocyte > hematopoietic and immune system cell > Cell type	heart macrophage		18	0.60824	0.0920131	0.621283	0	0.209231	0.883234	1.33459
subcutaneous lymph node fibroblastic reticular cell > lymph node fibroblastic reticular cell > lymph node paracortex (deep cortex) cell > lymph node capsule cell > lymph node cell > lymphoid tissue cell > hematopoietic and immune system cell > Cell type	subcutaneous lymph node fibroblastic reticular cell		3	0.565414	0.144027	0.619732	0.293268	0.293268	0.783242	0.783242
terminal ileal epithelium > terminal ileal mucosa > terminal ileum > ileum > small intestine > intestine > gastrointestinal tract > alimentary system > Tissue	terminal ileal epithelium		10	0.588462	0.059983	0.617268	0.281032	0.399918	0.742434	0.800483
embryonic head > embryo > embryonic tissue / fluid > gestational structure > Tissue	embryonic head		3	0.57336	0.0589433	0.612805	0.457429	0.457429	0.649846	0.649846
tumor derived macrophage > macrophage > myeloid leukocyte > leukocyte > hematopoietic and immune system cell > Cell type	tumor derived macrophage		64	0.699736	0.0611966	0.609045	0	0.3878	1.13128	1.83614
bone marrow multipotent progenitor (MPP) cell > bone marrow hematopoietic stem / progenitor cell > hematopoietic stem / progenitor cell > hematopoietic and immune system cell > Cell type	bone marrow multipotent progenitor (MPP) cell		10	0.828658	0.145788	0.607273	0.438229	0.460334	1.21313	1.73388
tumor derived pulmonary (lung) epithelium cell > pulmonary (lung) epithelium cell > pulmonary (lung) mucosa cell > lung cell > respiratory system cell > Cell type	tumor derived pulmonary (lung) epithelium cell	----	3	0.614124	0.106332	0.604215	0.435107	0.435107	0.803051	0.803051
lung > respiratory system > Tissue	lung		132	0.622096	0.025976	0.598662	0	0.413162	0.764033	1.27306
thymus > lymphoid tissue > hematopoietic and immune system > Tissue	thymus		7	0.79242	0.275619	0.584749	0.161077	0.413882	0.872295	0.872295
macrophage > myeloid leukocyte > leukocyte > hematopoietic and immune system cell > Cell type	macrophage		4	0.640831	0.200016	0.583504	0.218156	0.528158	1.17816	1.17816
subcutaneous lymph node blood vessel endothelium cell > lymph node blood vessel endothelium cell > blood vessel endothelium cell > vascular endothelium cell > blood vessel cell > vascular system cell > cardiovascular system cell > circulatory system cell > Cell type	subcutaneous lymph node blood vessel endothelium cell		3	0.492031	0.186318	0.578879	0.134782	0.134782	0.762434	0.762434
embryonic forebrain (prosencephalon) > embryonic brain > embryo > embryonic tissue / fluid > gestational structure > Tissue	embryonic forebrain (prosencephalon)		25	0.59216	0.0309878	0.577482	0.37801	0.51868	0.63562	0.705929
bone marrow stromal cell > bone marrow cell > skeletal system cell > musculoskeletal system cell > Cell type	bone marrow stromal cell		12	0.568957	0.0531197	0.569224	0.361195	0.414383	0.68574	0.959102
embryonic lung > embryo > embryonic tissue / fluid > gestational structure > Tissue	embryonic lung		3	0.550321	0.0670566	0.567511	0.426539	0.426539	0.656914	0.656914
cerebral cortex microglia cell > telencephalon microglia cell > forebrain microglia cell > brain microglia cell > microglia cell > glia cell > central nervous system cell > nervous system cell > Cell type	cerebral cortex microglia cell		41	0.723975	0.100407	0.564268	0	0.352174	0.830584	1.50287
peripheral nervous system macrophage > macrophage > myeloid leukocyte > leukocyte > hematopoietic and immune system cell > Cell type	peripheral nervous system macrophage		4	0.507887	0.192112	0.556104	0	0.481965	0.91934	0.91934
Peyer’s patch conventional dendritic cell > conventional dendritic cell > dendritic cell > leukocyte > hematopoietic and immune system cell > Cell type	Peyer’s patch conventional dendritic cell		12	0.568294	0.0941165	0.556051	0.117881	0.385195	0.719634	0.790871
striatum astrocyte > basal ganglia astrocyte > telencephalon astrocyte > forebrain astrocyte > brain astrocyte (unspecified) > astrocyte (unspecified) > astrocyte > glia cell > central nervous system cell > nervous system cell > Cell type	striatum astrocyte		4	0.592275	0.140379	0.555215	0.342053	0.373665	0.916617	0.916617
splenic conventional dendritic cell > conventional dendritic cell > dendritic cell > leukocyte > hematopoietic and immune system cell > Cell type	splenic conventional dendritic cell	Synonyms: splenic classical dendritic cell, splenic myeloid dendritic cell. Typically described as CD11c-high.	40	0.696726	0.087322	0.553555	0	0.238027	1.27954	1.8233
glomerulus > renal corpuscle > nephron > kidney > urinary system > Tissue	glomerulus		30	0.556948	0.042466	0.549924	0.0850116	0.39951	0.717032	1.02913
bone > skeletal system (except bone marrow) > musculoskeletal system > Tissue	bone		1	0.548294	NaN	0.548294	0.548294	0.548294	0.548294	0.548294
primary intestinal organoid > Organotypic / 3D culture	primary intestinal organoid	Organoids derived from primary cells of the small intestine.	12	0.559015	0.0714976	0.545844	0.232548	0.406184	0.694598	0.761735
brain (encephalon) > central nervous system (CNS) > nervous system > Tissue	brain (encephalon)		79	0.544402	0.0219563	0.544795	0.142391	0.428402	0.680557	1.04767
hepatic stellate cell > liver cell > liver and biliary system cell > alimentary system cell > Cell type	hepatic stellate cell		52	0.735828	0.0752691	0.542903	0.0337159	0.339195	1.02331	2.04228
embryonic fibroblast (unspecified) > embryonic cell > gestational structure cell > Cell type	embryonic fibroblast (unspecified)		18	0.478596	0.0656423	0.541105	0.0754157	0.206648	0.759115	0.841309
lens > eye > sensory organ system > Tissue	lens		8	0.504156	0.0831902	0.536135	0.215239	0.281023	0.712961	0.826235
hypothalamus astrocyte > diencephalon astrocyte > forebrain astrocyte > brain astrocyte (unspecified) > astrocyte (unspecified) > astrocyte > glia cell > central nervous system cell > nervous system cell > Cell type	hypothalamus astrocyte		8	0.51493	0.0440087	0.532715	0.368883	0.399079	0.643435	0.676939
spinal cord > central nervous system (CNS) > nervous system > Tissue	spinal cord		24	0.485475	0.0439143	0.531419	0.309855	0.420878	0.570041	0.740667
natural killer cell > group 1 innate lymphoid cell > innate lymphoid cell > lymphoid leukocyte > leukocyte > hematopoietic and immune system cell > Cell type	natural killer cell	A lymphocyte that can spontaneously kill a variety of target cells without prior antigenic activation via germline encoded activation receptors and also regulate immune responses via cytokine release and direct contact with other cells.	8	0.513487	0.0362739	0.524188	0.37569	0.434204	0.605573	0.647788
stomach > gastrointestinal tract > alimentary system > Tissue	stomach		6	0.680817	0.186018	0.52013	0.25818	0.344734	1.04586	1.39587
mesenteric macrophage > macrophage > myeloid leukocyte > leukocyte > hematopoietic and immune system cell > Cell type	mesenteric macrophage		4	0.66531	0.242177	0.516047	0.260763	0.490937	1.36839	1.36839
small intestine stem cell > small intestine cell > intestine cell > gastrointestinal tract cell > alimentary system cell > Cell type	small intestine stem cell		4	0.465381	0.11178	0.512263	0.157243	0.464117	0.679754	0.679754
cerebellum > metencephalon > hindbrain (rhombencephalon) > brain (encephalon) > central nervous system (CNS) > nervous system > Tissue	cerebellum		188	0.513628	0.0107321	0.511772	0.185555	0.413518	0.604856	0.866681
kidney > urinary system > Tissue	kidney		207	0.549953	0.0208426	0.510555	0	0.326212	0.756728	1.29938
hepatic monocyte derived macrophage > hepatic macrophage > macrophage > myeloid leukocyte > leukocyte > hematopoietic and immune system cell > Cell type	hepatic monocyte derived macrophage		4	0.548601	0.0749513	0.508935	0.419272	0.464216	0.757263	0.757263
oligodendrocyte progenitor cell > glia cell > central nervous system cell > nervous system cell > Cell type	oligodendrocyte progenitor cell		12	0.538563	0.042322	0.506126	0.2819	0.447347	0.671771	0.749651
skeletal muscle satellite (stem) cell > skeletal muscle cell > musculoskeletal system cell > Cell type	skeletal muscle satellite (stem) cell		19	0.575014	0.0954041	0.499105	0.0853671	0.183358	1.04754	1.23576
embryonic limb bud > embryo > embryonic tissue / fluid > gestational structure > Tissue	embryonic limb bud		3	0.455701	0.0536107	0.488498	0.350897	0.350897	0.527709	0.527709
cerebral cortex neuron > telencephalon neuron (unspecified) > telencephalon neuron > forebrain neuron > brain neuron > neuron > central nervous system cell > nervous system cell > Cell type	cerebral cortex neuron		30	0.469526	0.0428753	0.481945	0.0764196	0.307912	0.566882	0.794697
cortical thymic epithelium cell > thymic cortex cell > thymic lobe cell > thymic epithelium cell > thymus cell > lymphoid tissue cell > hematopoietic and immune system cell > Cell type	cortical thymic epithelium cell		6	0.657893	0.141457	0.475953	0.397224	0.429961	0.92473	1.24354
articular chondrocyte > articular cartilage cell > cartilage cell > skeletal system cell > musculoskeletal system cell > Cell type	articular chondrocyte		6	0.464259	0.0426734	0.473449	0.309029	0.391242	0.553849	0.584536
incisor > tooth > mouth (oral cavity) > gastrointestinal tract > alimentary system > Tissue	incisor		8	0.482503	0.0755201	0.462472	0.214162	0.360414	0.662749	0.832704
sciatic nerve > peripheral nerve > peripheral nervous system (PNS) > nervous system > Tissue	sciatic nerve		39	0.370657	0.0302598	0.459277	0	0.261567	0.498603	0.61673
embryonic forebrain endothelium cell > embryonic brain endothelium cell > embryonic blood vessel vascular endothelium cell > embryonic vascular endothelium cell > embryonic blood vessel cell > embryonic vascular system cell > embryonic cardiovascular system cell > embryonic circulatory system cell > embryonic cell > gestational structure cell > Cell type	embryonic forebrain endothelium cell		25	0.506647	0.0435525	0.455126	0.185665	0.374882	0.578565	0.867448
rib cartilage > cartilage > skeletal system (except bone marrow) > musculoskeletal system > Tissue	rib cartilage		1	0.438212	NaN	0.438212	0.438212	0.438212	0.438212	0.438212
brain astrocyte (unspecified) > astrocyte (unspecified) > astrocyte > glia cell > central nervous system cell > nervous system cell > Cell type	brain astrocyte (unspecified)		18	0.822945	0.166532	0.436594	0.227692	0.276692	1.7957	1.87298
embryonic neocortical progenitor cell > embryonic brain neural progenitor cell > embryonic neural progenitor cell > embryonic central nervous system cell > embryonic nervous system cell > embryonic cell > gestational structure cell > Cell type	embryonic neocortical progenitor cell		6	0.460222	0.0576398	0.43	0.290607	0.358518	0.589602	0.662606
pulmonary neutrophil granulocyte > neutrophil granulocyte > granulocyte (polymorphonuclear leukocyte) > myeloid leukocyte > leukocyte > hematopoietic and immune system cell > Cell type	pulmonary neutrophil granulocyte		3	0.542054	0.164041	0.423629	0.336296	0.336296	0.866238	0.866238
embryonic liver endothelium cell > embryonic blood vessel vascular endothelium cell > embryonic vascular endothelium cell > embryonic blood vessel cell > embryonic vascular system cell > embryonic cardiovascular system cell > embryonic circulatory system cell > embryonic cell > gestational structure cell > Cell type	embryonic liver endothelium cell		3	0.397509	0.0477024	0.400455	0.313453	0.313453	0.47862	0.47862
embryonic testis > embryo > embryonic tissue / fluid > gestational structure > Tissue	embryonic testis		6	0.37037	0.0435263	0.399333	0.205173	0.283144	0.457479	0.47776
spinal cord astrocyte > astrocyte (unspecified) > astrocyte > glia cell > central nervous system cell > nervous system cell > Cell type	spinal cord astrocyte		42	0.46712	0.0604532	0.392217	0	0.181567	0.634829	1.29825
tumor derived dendritic cell > dendritic cell > leukocyte > hematopoietic and immune system cell > Cell type	tumor derived dendritic cell		14	0.328693	0.0513703	0.380747	0	0.209984	0.460367	0.679491
embryonic submandibular gland > embryonic salivary gland > embryonic mouth (oral cavity) > embryonic gastrointestinal tract > embryonic alimentary system > embryo > embryonic tissue / fluid > gestational structure > Tissue	embryonic submandibular gland		7	0.427917	0.0433521	0.379908	0.312169	0.350741	0.508801	0.645177
ileum > small intestine > intestine > gastrointestinal tract > alimentary system > Tissue	ileum		47	0.369455	0.0172335	0.374596	0.166911	0.265636	0.432673	0.601293
epididymal adipose tissue macrophage > adipose tissue macrophage > macrophage > myeloid leukocyte > leukocyte > hematopoietic and immune system cell > Cell type	epididymal adipose tissue macrophage		3	0.33782	0.187231	0.366821	0	0	0.64664	0.64664
renal (kidney) cortex > kidney > urinary system > Tissue	renal (kidney) cortex		24	0.363529	0.0198929	0.35978	0.174879	0.290078	0.426266	0.590184
heart monocyte > monocyte > myeloid leukocyte > leukocyte > hematopoietic and immune system cell > Cell type	heart monocyte		8	0.311633	0.102201	0.355262	0	0	0.680499	0.68597
subcutaneous lymph node lymphatic vessel endothelium cell > lymph node lymphatic vessel endothelium cell > lymphatic vessel vascular endothelium cell > lymph vessel cell > vascular system cell > cardiovascular system cell > circulatory system cell > Cell type	subcutaneous lymph node lymphatic vessel endothelium cell		2	0.351183	0.351183	0.351183	0	0	0.702365	0.702365
hepatic macrophage > macrophage > myeloid leukocyte > leukocyte > hematopoietic and immune system cell > Cell type	hepatic macrophage		18	0.440258	0.114194	0.349296	0	0	0.669763	1.29394
lactating breast (mammary gland) > breast (mammary gland) > trunk > other body part > Tissue	lactating breast (mammary gland)		12	0.376322	0.0454617	0.348915	0.179017	0.302839	0.418107	0.567125
podocyte > Bowman's capsule (glomerular capsule) cell > renal corpuscle cell > nephron cell > kidney cell > urinary system cell > Cell type	podocyte		6	0.425011	0.107315	0.346797	0.226298	0.244627	0.450368	0.450368
endothelium cell > glomerulus cell > renal corpuscle cell > nephron cell > kidney cell > urinary system cell > Cell type	endothelium cell		6	0.369547	0.0665349	0.337112	0.20208	0.263772	0.416857	0.416857
skin fibroblast > skin cell > integumentary system cell > Cell type	skin fibroblast		212	0.359801	0.0134068	0.334404	0	0.208128	0.473917	0.849584
motor cortex astrocyte > frontal lobe astrocyte > cerebral cortex astrocyte > telencephalon astrocyte > forebrain astrocyte > brain astrocyte (unspecified) > astrocyte (unspecified) > astrocyte > glia cell > central nervous system cell > nervous system cell > Cell type	motor cortex astrocyte		8	0.294644	0.0325872	0.328536	0.306935	0.306935	0.355914	0.390758
embryonic dorsal root ganglion cell > embryonic peripheral nervous system cell > embryonic nervous system cell > embryonic cell > gestational structure cell > Cell type	embryonic dorsal root ganglion cell	Synonyms: embryonic spinal ganglion cell, embryonic posterior root ganglion cell.	18	0.337604	0.0247121	0.327666	0.170516	0.264369	0.402339	0.574398
pancreatic beta cell > pancreatic islet cell > endocrine pancreatic cell > endocrine system (except testis and ovary) cell > Cell type	pancreatic beta cell		44	0.346264	0.0217557	0.326722	0.112254	0.271056	0.459732	0.694082
peritoneal monocyte > monocyte > myeloid leukocyte > leukocyte > hematopoietic and immune system cell > Cell type	peritoneal monocyte		9	0.25388	0.0871731	0.326008	0	0	0.393473	0.633022
spinal cord motor neuron > spinal cord neuron > neuron > central nervous system cell > nervous system cell > Cell type	spinal cord motor neuron		8	0.361974	0.03662	0.325115	0.248526	0.308687	0.493101	0.518063
splenic plasma cell > plasma cell > antibody-secreting cell > B-cell lineage > lymphocyte > lymphoid leukocyte > leukocyte > hematopoietic and immune system cell > Cell type	splenic plasma cell	A terminally differentiated, post-mitotic, antibody secreting cell of the B-cell lineage typically described as CD138-positive, surface immunoglobulin-negative, and MHC Class II-negative isolated from the spleen.	1	0.323732	NaN	0.323732	0.323732	0.323732	0.323732	0.323732
bone marrow derived mesenchymal stromal cell > bone marrow stromal cell > bone marrow cell > skeletal system cell > musculoskeletal system cell > Cell type	bone marrow derived mesenchymal stromal cell		12	0.339433	0.0805675	0.321995	0	0.0806586	0.599962	0.695325
tumor derived astrocyte > astrocyte (unspecified) > astrocyte > glia cell > central nervous system cell > nervous system cell > Cell type	tumor derived astrocyte		8	0.477374	0.154923	0.320453	0.0374385	0.242478	0.933439	1.34517
monocyte derived Kupffer cell > hepatic macrophage > macrophage > myeloid leukocyte > leukocyte > hematopoietic and immune system cell > Cell type	monocyte derived Kupffer cell		7	0.352082	0.0782596	0.31692	0.095289	0.209955	0.581996	0.663578
hippocampus astrocyte > temporal lobe astrocyte > cerebral cortex astrocyte > telencephalon astrocyte > forebrain astrocyte > brain astrocyte (unspecified) > astrocyte (unspecified) > astrocyte > glia cell > central nervous system cell > nervous system cell > Cell type	hippocampus astrocyte		13	0.374818	0.0547229	0.314098	0.126006	0.246975	0.466375	0.77828
mesenteric lymph node conventional dendritic cell > lymph node conventional dendritic cell > conventional dendritic cell > dendritic cell > leukocyte > hematopoietic and immune system cell > Cell type	mesenteric lymph node conventional dendritic cell	Synonyms: mesenteric lymph node classical dendritic cell, mesenteric lymph node myeloid dendritic cell. Typically described as CD11c-high.	13	0.415504	0.0980983	0.308807	0	0.105889	0.715164	0.941231
primary somatosensory cortex astrocyte > postcentral gyrus astrocyte > parietal lobe astrocyte > cerebral cortex astrocyte > telencephalon astrocyte > forebrain astrocyte > brain astrocyte (unspecified) > astrocyte (unspecified) > astrocyte > glia cell > central nervous system cell > nervous system cell > Cell type	primary somatosensory cortex astrocyte		4	0.304191	0.0421949	0.307523	0.202714	0.275462	0.399003	0.399003
cerebral cortex astrocyte > telencephalon astrocyte > forebrain astrocyte > brain astrocyte (unspecified) > astrocyte (unspecified) > astrocyte > glia cell > central nervous system cell > nervous system cell > Cell type	cerebral cortex astrocyte		59	0.418597	0.0655183	0.304435	0	0.0775222	0.57864	1.14614
frontal cortex > frontal lobe > cerebral cortex lobe / region > cerebral cortex (neopallium) > cerebral hemisphere > telencephalon (cerebrum) > forebrain (prosencephalon) > brain (encephalon) > central nervous system (CNS) > nervous system > Tissue	frontal cortex		12	0.34236	0.050832	0.30129	0.113163	0.244574	0.553212	0.706029
colon > colorectum > large intestine > intestine > gastrointestinal tract > alimentary system > Tissue	colon		6	0.299129	0.0787369	0.300408	0	0.225792	0.379972	0.588193
bone marrow > hematopoietic and immune system > Tissue	bone marrow		5	0.322146	0.0483087	0.299052	0.166418	0.298059	0.40457	0.44263
embryonic lung endothelium cell > embryonic blood vessel vascular endothelium cell > embryonic vascular endothelium cell > embryonic blood vessel cell > embryonic vascular system cell > embryonic cardiovascular system cell > embryonic circulatory system cell > embryonic cell > gestational structure cell > Cell type	embryonic lung endothelium cell		3	0.280956	0.0177723	0.283737	0.248877	0.248877	0.310254	0.310254
tumor derived neutrophil granulocyte > neutrophil granulocyte > granulocyte (polymorphonuclear leukocyte) > myeloid leukocyte > leukocyte > hematopoietic and immune system cell > Cell type	tumor derived neutrophil granulocyte		3	0.246649	0.0276993	0.269549	0.191514	0.191514	0.278886	0.278886
visceral adipose tissue macrophage > adipose tissue macrophage > macrophage > myeloid leukocyte > leukocyte > hematopoietic and immune system cell > Cell type	visceral adipose tissue macrophage		11	0.273998	0.0467584	0.2682	0.0746475	0.139769	0.325447	0.429269
liver > liver and biliary system > alimentary system > Tissue	liver		2026	0.284113	0.00429109	0.250129	0	0.149952	0.381676	0.728163
outflow tract > anterior second heart field > pharyngeal mesoderm > mesoderm > germ layer > embryo > embryonic tissue / fluid > gestational structure > Tissue	outflow tract		8	0.237972	0.012398	0.236035	0.185882	0.214725	0.274376	0.293354
plantaris tendon > tendon > musculoskeletal system > Tissue	plantaris tendon		20	0.266749	0.0319807	0.235541	0.090906	0.183531	0.342486	0.493955
choroid plexus > ventricular system of brain > brain (encephalon) > central nervous system (CNS) > nervous system > Tissue	choroid plexus		17	0.219301	0.0223965	0.229152	0.13555	0.159209	0.254804	0.373533
tumor derived monocyte > monocyte > myeloid leukocyte > leukocyte > hematopoietic and immune system cell > Cell type	tumor derived monocyte		2	0.225718	0.00652324	0.225718	0.219195	0.219195	0.232242	0.232242
small intestine > intestine > gastrointestinal tract > alimentary system > Tissue	small intestine		1	0.222281	NaN	0.222281	0.222281	0.222281	0.222281	0.222281
anterior prostate > prostate (prostate gland) > male reproductive system > reproductive system > Tissue	anterior prostate		12	0.219804	0.0409197	0.222171	0.0289294	0.0878801	0.327025	0.512793
inguinal lymph node > lymph node > lymphoid tissue > hematopoietic and immune system > Tissue	inguinal lymph node		6	0.243495	0.0972864	0.220146	0	0	0.40598	0.6147
peritoneal cavity eosinophil granulocyte > eosinophil granulocyte > granulocyte (polymorphonuclear leukocyte) > myeloid leukocyte > leukocyte > hematopoietic and immune system cell > Cell type	peritoneal cavity eosinophil granulocyte		2	0.210094	0.120692	0.210094	0.089402	0.089402	0.330786	0.330786
pancreatic islet (islet of Langerhans) > pancreas > alimentary system > Tissue	pancreatic islet (islet of Langerhans)		310	0.22653	0.00595476	0.210036	0.060234	0.148443	0.287556	0.494072
visual cortex astrocyte > occipital lobe astrocyte > cerebral cortex astrocyte > telencephalon astrocyte > forebrain astrocyte > brain astrocyte (unspecified) > astrocyte (unspecified) > astrocyte > glia cell > central nervous system cell > nervous system cell > Cell type	visual cortex astrocyte		8	0.226992	0.033415	0.204611	0.109118	0.182817	0.273991	0.273991
skin > integumentary system > Tissue	skin		99	0.287268	0.0309396	0.203232	0	0.0955277	0.415755	0.855116
brown adipose tissue (brown fat,BAT) > adipose tissue (fat) > connective tissue > Tissue	brown adipose tissue (brown fat,BAT)		24	0.201187	0.0216352	0.197388	0.0250765	0.146672	0.302328	0.464023
brain neuron > neuron > central nervous system cell > nervous system cell > Cell type	brain neuron		9	0.202214	0.0375286	0.186052	0	0.141334	0.285558	0.338949
embryonic leg endothelium cell > embryonic blood vessel vascular endothelium cell > embryonic vascular endothelium cell > embryonic blood vessel cell > embryonic vascular system cell > embryonic cardiovascular system cell > embryonic circulatory system cell > embryonic cell > gestational structure cell > Cell type	embryonic leg endothelium cell		3	0.188402	0.0123052	0.185212	0.168863	0.168863	0.21113	0.21113
cervical lymph node > lymph node > lymphoid tissue > hematopoietic and immune system > Tissue	cervical lymph node		5	0.239192	0.0817823	0.183093	0	0.177055	0.364671	0.471143
embryonic sinoatrial node > embryonic heart conduction system > embryonic heart muscle (myocardium, cardiac muscle) > embryonic heart > embryo > embryonic tissue / fluid > gestational structure > Tissue	embryonic sinoatrial node		10	0.338243	0.126315	0.176324	0	0.102953	0.339214	0.339214
embryonic liver > embryo > embryonic tissue / fluid > gestational structure > Tissue	embryonic liver		3	0.180466	0.0324437	0.174675	0.127392	0.127392	0.239332	0.239332
embryonic head endothelium cell > embryonic blood vessel vascular endothelium cell > embryonic vascular endothelium cell > embryonic blood vessel cell > embryonic vascular system cell > embryonic cardiovascular system cell > embryonic circulatory system cell > embryonic cell > gestational structure cell > Cell type	embryonic head endothelium cell		3	0.190724	0.0226095	0.172329	0.164148	0.164148	0.235696	0.235696
tracheal basal cell > tracheal epithelium cell > tracheal mucosa cell > trachea cell > respiratory system cell > Cell type	tracheal basal cell		65	0.200159	0.0288637	0.157889	0	0	0.308668	0.690463
skeletal muscle > musculoskeletal system > Tissue	skeletal muscle		9	0.17166	0.0332465	0.157545	0.132962	0.13665	0.179995	0.179995
embryonic heart ventricle > embryonic heart muscle (myocardium, cardiac muscle) > embryonic heart > embryo > embryonic tissue / fluid > gestational structure > Tissue	embryonic heart ventricle		8	0.1705	0.0267821	0.155523	0.0676787	0.132291	0.246651	0.271795
migratory dendritic cell (mediastinal lymph node) > mediastinal lymph node conventional dendritic cell > lymph node conventional dendritic cell > conventional dendritic cell > dendritic cell > leukocyte > hematopoietic and immune system cell > Cell type	migratory dendritic cell (mediastinal lymph node)		5	0.273537	0.148655	0.155398	0	0	0.437156	0.77513
bone marrow hematopoietic stem cell > bone marrow hematopoietic stem / progenitor cell > hematopoietic stem / progenitor cell > hematopoietic and immune system cell > Cell type	bone marrow hematopoietic stem cell		6	0.189177	0.0715116	0.152712	0	0.0906321	0.227709	0.227709
cerebellum astrocyte > metencephalon astrocyte > hindbrain astrocyte > brain astrocyte (unspecified) > astrocyte (unspecified) > astrocyte > glia cell > central nervous system cell > nervous system cell > Cell type	cerebellum astrocyte		17	0.129907	0.0219157	0.143669	0	0.0648222	0.186252	0.313421
embryonic tendon cell > embryonic musculoskeletal system cell > embryonic cell > gestational structure cell > Cell type	embryonic tendon cell		4	0.159261	0.0573238	0.141082	0.0423531	0.112684	0.312528	0.312528
mesenteric lymph node > lymph node > lymphoid tissue > hematopoietic and immune system > Tissue	mesenteric lymph node		6	0.1409	0.0534237	0.138264	0	0	0.260702	0.308171
tumor derived CD4 helper T-cell (unspecified) > CD4 helper T-cell (unspecified) > CD4 helper T-cell > CD4 T-cell > T-cell > T-cell lineage > lymphocyte > lymphoid leukocyte > leukocyte > hematopoietic and immune system cell > Cell type	tumor derived CD4 helper T-cell (unspecified)		4	0.682033	0.558742	0.136281	0.0979599	0.105329	2.35761	2.35761
liver left lobe > liver lobe > liver > liver and biliary system > alimentary system > Tissue	liver left lobe		15	0.147895	0.0211056	0.133665	0.0316196	0.0832581	0.22158	0.271633
spleen > lymphoid tissue > hematopoietic and immune system > Tissue	spleen		7	0.321613	0.19717	0.123575	0	0	0.355207	0.355207
embryonic heart right atrium > embryonic heart atrium > embryonic heart muscle (myocardium, cardiac muscle) > embryonic heart > embryo > embryonic tissue / fluid > gestational structure > Tissue	embryonic heart right atrium		3	0.124087	0.0218672	0.122943	0.0867968	0.0867968	0.162521	0.162521
embryonic heart endothelium cell > embryonic blood vessel vascular endothelium cell > embryonic vascular endothelium cell > embryonic blood vessel cell > embryonic vascular system cell > embryonic cardiovascular system cell > embryonic circulatory system cell > embryonic cell > gestational structure cell > Cell type	embryonic heart endothelium cell		3	0.1394	0.0364216	0.117385	0.0902725	0.0902725	0.210541	0.210541
aorta > artery > blood vessel > vascular system > cardiovascular system > circulatory system > Tissue	aorta		7	0.127923	0.0252101	0.113277	0.0609334	0.0817292	0.174791	0.254015
small intestinal innate lymphoid cell 1 > innate lymphoid cell 1 > group 1 innate lymphoid cell > innate lymphoid cell > lymphoid leukocyte > leukocyte > hematopoietic and immune system cell > Cell type	small intestinal innate lymphoid cell 1	A group 1 innate lymphoid cell other than natural killer cells, isolated from the small intestine.	4	0.0875428	0.0297565	0.111744	0.10038	0.10038	0.126683	0.126683
inguinal adipose tissue > intraperitoneal adipose tissue > intraabdominal adipose tissue (abdominal visceral adipose tissue) > abdominal adipose tissue > adipose tissue (fat) > connective tissue > Tissue	inguinal adipose tissue		8	0.123623	0.0294519	0.106813	0.0390029	0.07608	0.170541	0.30203
synovial lining macrophage > macrophage > myeloid leukocyte > leukocyte > hematopoietic and immune system cell > Cell type	synovial lining macrophage		1	0.105175	NaN	0.105175	0.105175	0.105175	0.105175	0.105175
muscle of lower limb > skeletal muscle > musculoskeletal system > Tissue	muscle of lower limb		18	0.123628	0.0202515	0.101354	0.0157815	0.0614852	0.145597	0.223333
epididymal adipose tissue > gonadal adipose tissue > intraabdominal adipose tissue (abdominal visceral adipose tissue) > abdominal adipose tissue > adipose tissue (fat) > connective tissue > Tissue	epididymal adipose tissue		40	0.314852	0.107187	0.0927498	0	0.0580449	0.15182	0.219145
submandibular gland > salivary gland > mouth (oral cavity) > gastrointestinal tract > alimentary system > Tissue	submandibular gland		6	0.116636	0.0483931	0.0899903	0	0	0.246051	0.273782
gastrocnemius muscle > leg muscle > muscle of lower limb > skeletal muscle > musculoskeletal system > Tissue	gastrocnemius muscle		24	0.110064	0.0137844	0.0879675	0.0109948	0.0645022	0.157707	0.209191
cartilage > skeletal system (except bone marrow) > musculoskeletal system > Tissue	cartilage		1	0.08304	NaN	0.08304	0.08304	0.08304	0.08304	0.08304
jejunal villus cell > jejunal mucosa cell > small intestinal mucosa cell > small intestine cell > intestine cell > gastrointestinal tract cell > alimentary system cell > Cell type	jejunal villus cell		3	0.0612639	0.0327791	0.0716856	0	0	0.112106	0.112106
neonatal ventricular cardiomyocyte > cardiomyocyte (heart muscle cell) > heart cell > cardiovascular system cell > circulatory system cell > Cell type	neonatal ventricular cardiomyocyte		2	0.0696835	0.00121586	0.0696835	0.0684677	0.0684677	0.0708994	0.0708994
duodenal epithelium > duodenal mucosa > duodenum > small intestine > intestine > gastrointestinal tract > alimentary system > Tissue	duodenal epithelium		7	0.0754928	0.0107077	0.0652666	0.0412414	0.0455041	0.0999319	0.11194
optic nerve (CN II) astrocyte > cranial nerve astrocyte > astrocyte (unspecified) > astrocyte > glia cell > central nervous system cell > nervous system cell > Cell type	optic nerve (CN II) astrocyte		8	0.184516	0.109804	0.0603088	0	0.00808269	0.281767	0.281767
triceps muscle > arm muscle > muscle of upper limb > skeletal muscle > musculoskeletal system > Tissue	triceps muscle		12	0.0563606	0.0116035	0.0536586	0	0.0287291	0.0777762	0.150077
heart ventricle > heart muscle (myocardium, cardiac muscle) > heart > cardiovascular system > circulatory system > Tissue	heart ventricle		178	0.0880648	0.00744506	0.0531057	0	0	0.137211	0.334885
heart right atrium > heart atrium > heart muscle (myocardium, cardiac muscle) > heart > cardiovascular system > circulatory system > Tissue	heart right atrium		6	0.119591	0.076499	0.0526788	0	0.0370259	0.0770155	0.0770155
tongue > mouth (oral cavity) > gastrointestinal tract > alimentary system > Tissue	tongue		12	0.0641477	0.0117425	0.0517355	0.0213896	0.045745	0.0757737	0.0965101
patellar tendon stem cell > tendon stem cell > tendon cell > musculoskeletal system cell > Cell type	patellar tendon stem cell		7	0.668968	0.339164	0.051505	0	0	1.40414	2.23908
breast (mammary gland) basal myoepithelium cell > breast (mammary gland) epithelium cell > breast (mammary gland) cell > trunk cell > other body part cell > Cell type	breast (mammary gland) basal myoepithelium cell		6	0.0646859	0.0279525	0.0509977	0	0.0172541	0.0758026	0.0758026
hair follicle > hair > skin appendage > skin > integumentary system > Tissue	hair follicle		13	0.044295	0.0121295	0.0489433	0	0	0.0645561	0.122735
gastric macrophage > macrophage > myeloid leukocyte > leukocyte > hematopoietic and immune system cell > Cell type	gastric macrophage		6	0.0809086	0.0362421	0.0447877	0	0.0107333	0.179994	0.205149
heart muscle (myocardium, cardiac muscle) > heart > cardiovascular system > circulatory system > Tissue	heart muscle (myocardium, cardiac muscle)		1	0.0427435	NaN	0.0427435	0.0427435	0.0427435	0.0427435	0.0427435
epidermal Langerhans cell > epidermis cell > skin cell > integumentary system cell > Cell type	epidermal Langerhans cell		7	1.1464	0.53815	0.0380385	0	0	2.55461	2.91778
sinoatrial node > heart conduction system > heart muscle (myocardium, cardiac muscle) > heart > cardiovascular system > circulatory system > Tissue	sinoatrial node		6	0.0450369	0.0207622	0.038035	0	0	0.0817774	0.112374
heart left ventricle > heart ventricle > heart muscle (myocardium, cardiac muscle) > heart > cardiovascular system > circulatory system > Tissue	heart left ventricle		25	0.0428473	0.00723577	0.0300296	0	0.0195037	0.078681	0.126792
heart > cardiovascular system > circulatory system > Tissue	heart		58	0.037919	0.00505582	0.0290453	0	0	0.0605696	0.142977
blood > circulatory system > Tissue	blood		9	0.0327174	0.00867538	0.023187	0.00802796	0.017634	0.0434717	0.0504646
trophoblast > embryonic structure > embryo > embryonic tissue / fluid > gestational structure > Tissue	trophoblast		21	0.0584527	0.0167297	0.0219373	0	0	0.0717249	0.151865
epidermis > skin > integumentary system > Tissue	epidermis		23	0.0261958	0.00594889	0.0215748	0	0	0.036269	0.0802644
embryonic bone progenitor cell > embryonic skeletal system cell > embryonic musculoskeletal system cell > embryonic cell > gestational structure cell > Cell type	embryonic bone progenitor cell		6	0.0314703	0.0174215	0.0189089	0	0	0.0422138	0.0422138
dermis > skin > integumentary system > Tissue	dermis		10	0.024237	0.00849763	0.0169477	0	0	0.0380869	0.0745533
cardiomyocyte (heart muscle cell) > heart cell > cardiovascular system cell > circulatory system cell > Cell type	cardiomyocyte (heart muscle cell)		22	0.0544383	0.019509	0	0	0	0.0898574	0.155752
bulge stem cell > hair follicle cell > skin appendage cell > skin cell > integumentary system cell > Cell type	bulge stem cell		14	0.0246614	0.0129714	0	0	0	0.0288709	0.0468762
myofibroblast (unspecified) > musculoskeletal system cell > Cell type	myofibroblast (unspecified)		7	0.537239	0.457264	0	0	0	0.301208	0.301208
patellar tendon fibroblast > tendon fibroblast > tendon cell > musculoskeletal system cell > Cell type	patellar tendon fibroblast	Synonyms: patellar tendon tenocyte	6	0.034115	0.0322476	0	0	0	0.00952453	0.00952453
brain stem astrocyte > brain astrocyte (unspecified) > astrocyte (unspecified) > astrocyte > glia cell > central nervous system cell > nervous system cell > Cell type	brain stem astrocyte		10	0.113246	0.059361	0	0	0	0.197242	0.245931
olfactory bulb astrocyte > telencephalon astrocyte > forebrain astrocyte > brain astrocyte (unspecified) > astrocyte (unspecified) > astrocyte > glia cell > central nervous system cell > nervous system cell > Cell type	olfactory bulb astrocyte		10	0.129904	0.065405	0	0	0	0.193776	0.415304

## Sheet: C6orf118 Mouse Microarray
(log2 scale)			Gene Symbol	1700010I14Rik	1700010I14Rik	1700010I14Rik	1700010I14Rik	1700010I14Rik	1700010I14Rik	1700010I14Rik
			Gene	ENSMUSG00000023873	ENSMUSG00000023873	ENSMUSG00000023873	ENSMUSG00000023873	ENSMUSG00000023873	ENSMUSG00000023873	ENSMUSG00000023873
			Measure	1419624_a_at	1419624_a_at	1419624_a_at	1419624_a_at	1419624_a_at	1419624_a_at	1419624_a_at
Path to root	Anatomy	Description	# samples	Mean value	Standard Deviation	Median Value	Lower Whisker	Lower Quartile	Upper Quartile	Upper Whisker
testis (male gonad) > male reproductive system > reproductive system > Tissue	testis (male gonad)		72	14.3028	3.01391	15.8084	12.4938	14.5845	16.132	16.7247
primary spermatocyte (pachytene) > primary spermatocyte > male germ cell > male reproductive system cell > reproductive system cell > Cell type	primary spermatocyte (pachytene)		2	15.0931	0.149068	15.0931	14.9877	14.9877	15.1985	15.1985
spermatid > male germ cell > male reproductive system cell > reproductive system cell > Cell type	spermatid		2	14.9663	0.132605	14.9663	14.8726	14.8726	15.0601	15.0601
oocyte > female germ cell > female reproductive system cell > reproductive system cell > Cell type	oocyte		6	12.7365	0.472679	12.849	12.1718	12.2047	13.0682	13.2763
mast cell > myeloid leukocyte > leukocyte > hematopoietic and immune system cell > Cell type	mast cell		14	10.8277	0.939944	11.1675	10.9978	10.9998	11.2746	11.4323
splenic T1 B-cell > T1 B-cell > transitional stage B-cell > B-cell > B-cell lineage > lymphocyte > lymphoid leukocyte > leukocyte > hematopoietic and immune system cell > Cell type	splenic T1 B-cell	Synonym: splenic transitional stage 1 B-cell. A transitional stage B-cell that has migrated from the bone marrow to the spleen. This cell type is typically described as: surface IgM-high, surface IgD-negative, CD21-negative, CD23-negative, and CD62L-negative, and CD93-positive. This cell type has also been described as IgM-high, CD19-positive, B220-positive, AA4-positive, and CD23-negative.	6	11.0119	0.28928	11.0488	10.6776	10.7027	11.148	11.4453
CD8 activated T-cell (unspecified) > CD8 T-cell (unspecified) > CD8 T-cell > T-cell > T-cell lineage > lymphocyte > lymphoid leukocyte > leukocyte > hematopoietic and immune system cell > Cell type	CD8 activated T-cell (unspecified)		6	10.6717	0.206427	10.7465	10.6082	10.6082	10.785	10.8587
uterine cervix > uterus > female reproductive system > reproductive system > Tissue	uterine cervix		11	10.4488	0.938471	10.5525	10.0309	10.0897	11.1341	11.4521
blood > circulatory system > Tissue	blood		175	10.408	0.732275	10.5102	9.07692	10.0589	10.8465	11.9931
embryonic soft anterior palate > embryonic soft palate > embryonic head > embryo > embryonic tissue / fluid > gestational structure > Tissue	embryonic soft anterior palate		6	10.6654	0.528225	10.4725	10.0991	10.3079	11.2335	11.4066
embryonic liver hematopoietic stem-progenitor cell > embryonic liver cell > embryonic cell > gestational structure cell > Cell type	embryonic liver hematopoietic stem-progenitor cell		23	10.3977	0.569572	10.4624	9.55355	9.98887	10.8178	11.888
CD4 activated T-cell (unspecified) > CD4 T-cell (unspecified) > CD4 T-cell > T-cell > T-cell lineage > lymphocyte > lymphoid leukocyte > leukocyte > hematopoietic and immune system cell > Cell type	CD4 activated T-cell (unspecified)		7	10.474	0.723659	10.4451	9.09719	10.2402	11.1569	11.2297
intermediate mesoderm cell > mesoderm cell > germ layer (embryonic tissue) cell > embryonic cell > gestational structure cell > Cell type	intermediate mesoderm cell		6	10.1567	0.593507	10.3872	9.12817	9.80632	10.4566	10.7747
tumor derived CD8 T-cell (unspecified) > CD8 T-cell (unspecified) > CD8 T-cell > T-cell > T-cell lineage > lymphocyte > lymphoid leukocyte > leukocyte > hematopoietic and immune system cell > Cell type	tumor derived CD8 T-cell (unspecified)		17	10.2984	0.43582	10.2746	9.50684	10.0314	10.5508	11.11
embryonic microglia cell > embryonic glia cell > embryonic central nervous system cell > embryonic nervous system cell > embryonic cell > gestational structure cell > Cell type	embryonic microglia cell		18	10.0643	0.742858	10.265	8.92961	9.69145	10.4566	11.4774
type B spermatogonium > spermatogonium (spermatogonial stem cell) > male germ cell > male reproductive system cell > reproductive system cell > Cell type	type B spermatogonium		2	10.2072	4.54379	10.2072	6.99424	6.99424	13.4201	13.4201
embryonic soft posterior palate > embryonic soft palate > embryonic head > embryo > embryonic tissue / fluid > gestational structure > Tissue	embryonic soft posterior palate		9	10.0792	0.498683	10.1769	9.31084	9.81834	10.2831	10.3595
lymph node CD8 T-cell (unspecified) > CD8 T-cell (unspecified) > CD8 T-cell > T-cell > T-cell lineage > lymphocyte > lymphoid leukocyte > leukocyte > hematopoietic and immune system cell > Cell type	lymph node CD8 T-cell (unspecified)		1	10.1433	NaN	10.1433	10.1433	10.1433	10.1433	10.1433
pulmonary CD8 T-cell (unspecified) > CD8 T-cell (unspecified) > CD8 T-cell > T-cell > T-cell lineage > lymphocyte > lymphoid leukocyte > leukocyte > hematopoietic and immune system cell > Cell type	pulmonary CD8 T-cell (unspecified)		1	10.1085	NaN	10.1085	10.1085	10.1085	10.1085	10.1085
embryonic cell > gestational structure cell > Cell type	embryonic cell		69	9.6535	1.50043	10.0461	7.14792	8.23568	10.5338	13.3523
lymph node CD8 naive T-cell > CD8 naive T-cell > CD8 T-cell > T-cell > T-cell lineage > lymphocyte > lymphoid leukocyte > leukocyte > hematopoietic and immune system cell > Cell type	lymph node CD8 naive T-cell		1	9.92941	NaN	9.92941	9.92941	9.92941	9.92941	9.92941
lymph node CD8 activated T-cell (unspecified) > lymph node CD8 T-cell (unspecified) > CD8 T-cell (unspecified) > CD8 T-cell > T-cell > T-cell lineage > lymphocyte > lymphoid leukocyte > leukocyte > hematopoietic and immune system cell > Cell type	lymph node CD8 activated T-cell (unspecified)		1	9.92463	NaN	9.92463	9.92463	9.92463	9.92463	9.92463
CD8 single positive thymocyte > thymocyte > T-cell lineage > lymphocyte > lymphoid leukocyte > leukocyte > hematopoietic and immune system cell > Cell type	CD8 single positive thymocyte	A CD8-positive, CD4-negative thymocyte.	2	9.87465	0.508058	9.87465	9.5154	9.5154	10.2339	10.2339
kidney medullary pericyte > blood vessel pericyte > vascular pericyte > blood vessel cell > vascular system cell > cardiovascular system cell > circulatory system cell > Cell type	kidney medullary pericyte		9	9.76306	0.697119	9.84695	8.88341	9.02037	10.4887	10.5901
bone marrow hematopoietic stem / progenitor cell > hematopoietic stem / progenitor cell > hematopoietic and immune system cell > Cell type	bone marrow hematopoietic stem / progenitor cell		6	9.88888	0.630899	9.83955	9.71492	9.71492	9.87974	9.87974
common myeloid progenitor (CMP) cell (unspecified) > hematopoietic stem / progenitor cell > hematopoietic and immune system cell > Cell type	common myeloid progenitor (CMP) cell (unspecified)		2	9.79771	0.162553	9.79771	9.68277	9.68277	9.91265	9.91265
double positive thymocyte > thymocyte > T-cell lineage > lymphocyte > lymphoid leukocyte > leukocyte > hematopoietic and immune system cell > Cell type	double positive thymocyte	A thymocyte expressing both the CD4 and CD8 coreceptors.	8	9.67214	0.451304	9.77688	9.0489	9.27076	10.1113	10.1463
tracheal epithelium cell > tracheal mucosa cell > trachea cell > respiratory system cell > Cell type	tracheal epithelium cell		5	9.78121	0.732292	9.66574	8.86075	9.35418	10.3862	10.6391
granulocyte-monocyte progenitor (GMP) cell (unspecified) > hematopoietic stem / progenitor cell > hematopoietic and immune system cell > Cell type	granulocyte-monocyte progenitor (GMP) cell (unspecified)		2	9.63839	0.228084	9.63839	9.47711	9.47711	9.79967	9.79967
pulmonary CD8 activated T-cell (unspecified) > pulmonary CD8 T-cell (unspecified) > CD8 T-cell (unspecified) > CD8 T-cell > T-cell > T-cell lineage > lymphocyte > lymphoid leukocyte > leukocyte > hematopoietic and immune system cell > Cell type	pulmonary CD8 activated T-cell (unspecified)		1	9.61106	NaN	9.61106	9.61106	9.61106	9.61106	9.61106
CD4 T-cell (unspecified) > CD4 T-cell > T-cell > T-cell lineage > lymphocyte > lymphoid leukocyte > leukocyte > hematopoietic and immune system cell > Cell type	CD4 T-cell (unspecified)	A CD4-positive T-cell, subtype not further specified.	2	9.5785	0.247991	9.5785	9.40314	9.40314	9.75385	9.75385
bone marrow derived macrophage > macrophage > myeloid leukocyte > leukocyte > hematopoietic and immune system cell > Cell type	bone marrow derived macrophage	Macrophage derived from bone marrow cells in vitro in the presence of growth factors.	350	9.54389	0.74917	9.57789	8.25243	9.21977	9.89626	10.6435
horizontal basal neural stem cell > basal neural stem cell > neural stem cell > central nervous system cell > nervous system cell > Cell type	horizontal basal neural stem cell		6	9.6521	1.24092	9.51799	8.3374	8.55543	10.5634	11.4204
first pharyngeal arch > first arch > embryonic structure > embryo > embryonic tissue / fluid > gestational structure > Tissue	first pharyngeal arch		6	9.45955	0.288516	9.48407	9.01787	9.28515	9.67994	9.80621
hippocampus microglia cell > temporal lobe microglia cell > cerebral cortex microglia cell > telencephalon microglia cell > forebrain microglia cell > brain microglia cell > microglia cell > glia cell > central nervous system cell > nervous system cell > Cell type	hippocampus microglia cell		12	9.49491	0.186145	9.45783	9.27619	9.37895	9.57433	9.81377
pulmonary CD8 naive T-cell > CD8 naive T-cell > CD8 T-cell > T-cell > T-cell lineage > lymphocyte > lymphoid leukocyte > leukocyte > hematopoietic and immune system cell > Cell type	pulmonary CD8 naive T-cell		1	9.44958	NaN	9.44958	9.44958	9.44958	9.44958	9.44958
bone marrow derived myeloid precursor > myeloid leukocyte > leukocyte > hematopoietic and immune system cell > Cell type	bone marrow derived myeloid precursor		4	9.5364	0.393961	9.43286	9.19306	9.32488	10.0868	10.0868
CD8 T-cell (unspecified) > CD8 T-cell > T-cell > T-cell lineage > lymphocyte > lymphoid leukocyte > leukocyte > hematopoietic and immune system cell > Cell type	CD8 T-cell (unspecified)	A CD8-positive T-cell, subtype not further specified.	2	9.43146	0.0713597	9.43146	9.381	9.381	9.48192	9.48192
nasal epithelium > nasal mucosa > nose > sensory organ system > Tissue	nasal epithelium		235	9.40976	0.284669	9.39255	8.80858	9.23235	9.5922	10.1128
bone marrow mononuclear cell > bone marrow hematopoietic cell (unspecified) > hematopoietic and immune system cell > Cell type	bone marrow mononuclear cell	Bone marrow mononuclear cells consist of monocytes, lymphocytes, hematopoietic stem cells and progenitor cells.	10	9.38807	0.123601	9.37278	9.15608	9.32908	9.49895	9.56045
bone marrow granulocyte-monocyte progenitor (GMP) cell > bone marrow hematopoietic stem / progenitor cell > hematopoietic stem / progenitor cell > hematopoietic and immune system cell > Cell type	bone marrow granulocyte-monocyte progenitor (GMP) cell	Synonym: bone marrow granulocyte-macrophage progenitor cell	9	9.1987	0.342545	9.30316	8.63241	9.00267	9.40973	9.61154
CD4 regulatory T-cell (unspecified) > CD4 regulatory T-cell > CD4 T-cell > T-cell > T-cell lineage > lymphocyte > lymphoid leukocyte > leukocyte > hematopoietic and immune system cell > Cell type	CD4 regulatory T-cell (unspecified)		2	9.28912	0.284066	9.28912	9.08826	9.08826	9.48999	9.48999
embryonic renal proximal convoluted tubule > embryonic renal tubule > embryonic nephron > embryonic kidney > embryonic urinary system > embryo > embryonic tissue / fluid > gestational structure > Tissue	embryonic renal proximal convoluted tubule		3	9.35799	0.644511	9.24529	8.77726	8.77726	10.0514	10.0514
embryonic alveolar bipotent progenitor cell > embryonic pneumocyte > embryonic alveolar epithelium cell > embryonic alveolar cell > embryonic alveolar sac cell > embryonic bronchoalveolar system cell > embryonic lung cell > embryonic cell > gestational structure cell > Cell type	embryonic alveolar bipotent progenitor cell		3	8.96044	0.628502	9.2436	8.24017	8.24017	9.39755	9.39755
cerebral cortex oligodendrocyte (unspecified) > telencephalon oligodendrocyte (unspecified) > forebrain oligodendrocyte (unspecified) > brain oligodendrocyte (unspecified) > oligodendrocyte (unspecified) > oligodendrocyte > glia cell > central nervous system cell > nervous system cell > Cell type	cerebral cortex oligodendrocyte (unspecified)		27	9.06526	0.772685	9.23656	7.55236	8.38349	9.61888	10.2193
embryonic gonadal primordium (bipotential gonad) > embryo > embryonic tissue / fluid > gestational structure > Tissue	embryonic gonadal primordium (bipotential gonad)		31	9.22801	0.384459	9.23412	8.56159	8.93693	9.57671	9.91862
embryonic cerebral cortex endothelium cell > embryonic brain endothelium cell > embryonic blood vessel vascular endothelium cell > embryonic vascular endothelium cell > embryonic blood vessel cell > embryonic vascular system cell > embryonic cardiovascular system cell > embryonic circulatory system cell > embryonic cell > gestational structure cell > Cell type	embryonic cerebral cortex endothelium cell		4	9.3015	0.222231	9.21842	9.1393	9.20821	9.62988	9.62988
CD4 single positive thymocyte > thymocyte > T-cell lineage > lymphocyte > lymphoid leukocyte > leukocyte > hematopoietic and immune system cell > Cell type	CD4 single positive thymocyte	A CD4-positive, CD8-negative thymocyte.	10	9.44204	0.48965	9.20165	9.08114	9.13319	9.43717	9.43717
glomerulus > renal corpuscle > nephron > kidney > urinary system > Tissue	glomerulus		46	9.05191	0.789447	9.19679	7.50351	8.7268	9.61697	10.3038
granulocyte (polymorphonuclear leukocyte) > myeloid leukocyte > leukocyte > hematopoietic and immune system cell > Cell type	granulocyte (polymorphonuclear leukocyte)		2	9.19496	1.21827	9.19496	8.33351	8.33351	10.0564	10.0564
ovary (female gonad) > female reproductive system > reproductive system > Tissue	ovary (female gonad)		37	8.69227	0.860893	9.17767	6.9863	8.01134	9.32526	9.72543
tumor derived Th1 T-cell > Th1 T-cell > CD4 helper T-cell > CD4 T-cell > T-cell > T-cell lineage > lymphocyte > lymphoid leukocyte > leukocyte > hematopoietic and immune system cell > Cell type	tumor derived Th1 T-cell		3	9.1771	0.302842	9.13049	8.90026	8.90026	9.50054	9.50054
paraxial (presomitic) mesoderm > mesoderm > germ layer > embryo > embryonic tissue / fluid > gestational structure > Tissue	paraxial (presomitic) mesoderm		6	9.05856	0.201372	9.12789	9.03025	9.03025	9.18391	9.21349
lung cell > respiratory system cell > Cell type	lung cell	----	6	9.06882	1.15609	9.09511	8.75609	8.75609	9.78859	10.5424
embryonic atrioventricular canal > embryonic endocardium > embryonic heart > embryo > embryonic tissue / fluid > gestational structure > Tissue	embryonic atrioventricular canal		6	9.07378	0.0761314	9.04972	9.0217	9.02575	9.0716	9.0716
genital tubercle > urogenital sinus > embryo > embryonic tissue / fluid > gestational structure > Tissue	genital tubercle		3	8.73163	0.721828	9.04849	7.90557	7.90557	9.24084	9.24084
bone marrow stroma > bone marrow > hematopoietic and immune system > Tissue	bone marrow stroma		12	9.05822	0.188159	9.04102	8.78591	8.95504	9.17981	9.44245
embryonic lung endothelium cell > embryonic blood vessel vascular endothelium cell > embryonic vascular endothelium cell > embryonic blood vessel cell > embryonic vascular system cell > embryonic cardiovascular system cell > embryonic circulatory system cell > embryonic cell > gestational structure cell > Cell type	embryonic lung endothelium cell		4	8.97823	0.257457	9.0147	8.64328	8.92713	9.24027	9.24027
CD4 naive T-cell > CD4 T-cell > T-cell > T-cell lineage > lymphocyte > lymphoid leukocyte > leukocyte > hematopoietic and immune system cell > Cell type	CD4 naive T-cell		1	8.99523	NaN	8.99523	8.99523	8.99523	8.99523	8.99523
osteoclast > bone cell > bone tissue cell > skeletal system cell > musculoskeletal system cell > Cell type	osteoclast		2	8.99434	0.306866	8.99434	8.77735	8.77735	9.21133	9.21133
caecal (cecal) epithelium cell > caecal (cecal) mucosa cell > large intestinal mucosa cell > large intestine cell > intestine cell > gastrointestinal tract cell > alimentary system cell > Cell type	caecal (cecal) epithelium cell		32	8.98045	0.315471	8.99362	8.32418	8.78411	9.10769	9.43471
thymus > lymphoid tissue > hematopoietic and immune system > Tissue	thymus		12	8.67437	0.740384	8.98712	7.59388	8.16877	9.20618	9.58693
bone marrow stromal cell > bone marrow cell > skeletal system cell > musculoskeletal system cell > Cell type	bone marrow stromal cell		12	8.75991	0.734374	8.97137	7.75482	8.12882	9.52806	9.57206
natural killer cell > group 1 innate lymphoid cell > innate lymphoid cell > lymphoid leukocyte > leukocyte > hematopoietic and immune system cell > Cell type	natural killer cell	A lymphocyte that can spontaneously kill a variety of target cells without prior antigenic activation via germline encoded activation receptors and also regulate immune responses via cytokine release and direct contact with other cells.	2	8.96555	0.503299	8.96555	8.60966	8.60966	9.32143	9.32143
lymph node CD4 naive T-cell > CD4 naive T-cell > CD4 T-cell > T-cell > T-cell lineage > lymphocyte > lymphoid leukocyte > leukocyte > hematopoietic and immune system cell > Cell type	lymph node CD4 naive T-cell		2	8.96255	0.329464	8.96255	8.72959	8.72959	9.19552	9.19552
bone marrow hematopoietic stem cell > bone marrow hematopoietic stem / progenitor cell > hematopoietic stem / progenitor cell > hematopoietic and immune system cell > Cell type	bone marrow hematopoietic stem cell		14	8.93011	0.674036	8.95305	8.08529	8.20016	9.56586	9.73071
bone marrow common myeloid progenitor (CMP) cell > bone marrow hematopoietic stem / progenitor cell > hematopoietic stem / progenitor cell > hematopoietic and immune system cell > Cell type	bone marrow common myeloid progenitor (CMP) cell		23	8.92397	0.313669	8.92035	8.41709	8.68867	9.11595	9.68654
incisor > tooth > mouth (oral cavity) > gastrointestinal tract > alimentary system > Tissue	incisor		4	8.73881	0.551424	8.90889	8.79253	8.79253	9.18898	9.18898
bone marrow derived dendritic cells > dendritic cell > leukocyte > hematopoietic and immune system cell > Cell type	bone marrow derived dendritic cells		12	8.90758	0.142167	8.88119	8.70151	8.80716	9.05126	9.17752
embryonic renal (kidney) epithelium > embryonic renal (kidney) mucosa > embryonic kidney > embryonic urinary system > embryo > embryonic tissue / fluid > gestational structure > Tissue	embryonic renal (kidney) epithelium		3	8.64489	0.571536	8.8775	7.99373	7.99373	9.06345	9.06345
peripheral blood Th2 T-cell > Th2 T-cell > CD4 helper T-cell > CD4 T-cell > T-cell > T-cell lineage > lymphocyte > lymphoid leukocyte > leukocyte > hematopoietic and immune system cell > Cell type	peripheral blood Th2 T-cell		4	8.91257	0.210614	8.8747	8.71101	8.79507	9.18987	9.18987
lateral geniculate body (lateral geniculate nucleus) > metathalamus > thalamus (dorsal thalamus) > diencephalon > forebrain (prosencephalon) > brain (encephalon) > central nervous system (CNS) > nervous system > Tissue	lateral geniculate body (lateral geniculate nucleus)		11	8.60141	0.672142	8.8724	8.54878	8.54878	9.06061	9.06921
embryonic ureteric bud > embryonic kidney > embryonic urinary system > embryo > embryonic tissue / fluid > gestational structure > Tissue	embryonic ureteric bud		7	8.90073	0.544506	8.84093	8.28031	8.35067	9.25621	9.87658
urogenital sinus > embryo > embryonic tissue / fluid > gestational structure > Tissue	urogenital sinus		4	8.84521	0.467869	8.82812	8.31125	8.67285	9.41335	9.41335
type 2 myeloid cell (T2M) > granulocyte (polymorphonuclear leukocyte) > myeloid leukocyte > leukocyte > hematopoietic and immune system cell > Cell type	type 2 myeloid cell (T2M)		3	8.56751	0.559353	8.81445	7.92719	7.92719	8.9609	8.9609
platelet (thrombocyte) > myeloid cell > hematopoietic and immune system cell > Cell type	platelet (thrombocyte)		5	8.79725	0.0801331	8.80336	8.68902	8.75646	8.83665	8.90078
embryonic retina cell > embryonic eye cell > embryonic sensory organ system cell > embryonic cell > gestational structure cell > Cell type	embryonic retina cell		7	8.7408	0.287379	8.79996	8.31284	8.47042	8.85677	9.20249
embryonic urinary bladder smooth muscle > embryonic urinary bladder > embryonic urinary system > embryo > embryonic tissue / fluid > gestational structure > Tissue	embryonic urinary bladder smooth muscle		3	9.10609	0.621812	8.7763	8.71864	8.71864	9.82332	9.82332
splenic resting B-cell (unspecified) > splenic B-cell (unspecified) > B-cell (unspecified) > B-cell > B-cell lineage > lymphocyte > lymphoid leukocyte > leukocyte > hematopoietic and immune system cell > Cell type	splenic resting B-cell (unspecified)		6	8.77146	0.128219	8.77127	8.62717	8.63369	8.87744	8.94793
embryonic retinal fissure > embryonic retina > embryonic eye > embryonic sensory organ system > embryo > embryonic tissue / fluid > gestational structure > Tissue	embryonic retinal fissure		6	8.89785	0.289863	8.76958	8.68306	8.72812	8.98755	8.98755
peripheral blood Th1 T-cell > Th1 T-cell > CD4 helper T-cell > CD4 T-cell > T-cell > T-cell lineage > lymphocyte > lymphoid leukocyte > leukocyte > hematopoietic and immune system cell > Cell type	peripheral blood Th1 T-cell		6	8.77124	0.108043	8.7648	8.62461	8.71098	8.81826	8.94401
double negative thymocyte > thymocyte > T-cell lineage > lymphocyte > lymphoid leukocyte > leukocyte > hematopoietic and immune system cell > Cell type	double negative thymocyte	A thymocyte that lacks expression of CD4 and CD8.	18	8.64395	0.445836	8.75377	8.42953	8.50684	8.92086	9.17033
embryonic metanephric mesenchyme > embryonic kidney > embryonic urinary system > embryo > embryonic tissue / fluid > gestational structure > Tissue	embryonic metanephric mesenchyme		12	8.79871	0.448651	8.75341	8.13191	8.54882	8.99681	9.38143
splenic CD8 activated T-cell (unspecified) > splenic CD8 T-cell (unspecified) > CD8 T-cell (unspecified) > CD8 T-cell > T-cell > T-cell lineage > lymphocyte > lymphoid leukocyte > leukocyte > hematopoietic and immune system cell > Cell type	splenic CD8 activated T-cell (unspecified)		12	8.87003	1.0803	8.73991	7.66619	7.88038	10.0469	10.0923
splenic follicular B-cell > follicular B-cell > mature B-cell > B-cell > B-cell lineage > lymphocyte > lymphoid leukocyte > leukocyte > hematopoietic and immune system cell > Cell type	splenic follicular B-cell	A resting mature B-cell that is typically described as IgM-positive, IgD-positive, CD23-positive and CD21-positive, and found in the B-cell follicles of the white pulp of the spleen. This cell type is also described as being CD19-positive, B220-positive, AA4-negative, CD43-negative, and CD5-negative.	2	8.7339	0.122651	8.7339	8.64717	8.64717	8.82063	8.82063
facial nucleus motor neuron > facial nucleus neuron > brain stem neuron (unspecified) > brainstem neuron > brain neuron > neuron > central nervous system cell > nervous system cell > Cell type	facial nucleus motor neuron		6	8.78441	0.207466	8.73262	8.59891	8.6551	8.80678	8.80678
bone marrow monocyte > monocyte > myeloid leukocyte > leukocyte > hematopoietic and immune system cell > Cell type	bone marrow monocyte		3	8.68453	0.609878	8.72581	8.05507	8.05507	9.27272	9.27272
myelinating oligodendrocyte > oligodendrocyte > glia cell > central nervous system cell > nervous system cell > Cell type	myelinating oligodendrocyte		4	8.69193	0.365084	8.70991	8.2293	8.67044	9.11863	9.11863
cortical non-spiking interneuron > cerebral cortex interneuron > cerebral cortex neuron > telencephalon neuron (unspecified) > telencephalon neuron > forebrain neuron > brain neuron > neuron > central nervous system cell > nervous system cell > Cell type	cortical non-spiking interneuron		3	8.70948	0.0819575	8.70932	8.62761	8.62761	8.79152	8.79152
embryonic renal collecting duct (unspecified) > embryonic kidney > embryonic urinary system > embryo > embryonic tissue / fluid > gestational structure > Tissue	embryonic renal collecting duct (unspecified)		2	8.70356	0.0607488	8.70356	8.6606	8.6606	8.74651	8.74651
joint > skeletal system (except bone marrow) > musculoskeletal system > Tissue	joint		26	8.69767	0.255004	8.68665	8.25791	8.52716	8.83539	9.07441
cerebral cortex prepronociceptin neuron > cerebral cortex neuron > telencephalon neuron (unspecified) > telencephalon neuron > forebrain neuron > brain neuron > neuron > central nervous system cell > nervous system cell > Cell type	cerebral cortex prepronociceptin neuron		3	8.54527	0.513635	8.65424	7.9859	7.9859	8.99568	8.99568
activated subventricular neural stem cell > subventricular neural stem cell > lateral ventricle neural stem cell > ventricular system neural stem cell > neural stem cell > central nervous system cell > nervous system cell > Cell type	activated subventricular neural stem cell		2	8.63556	0.415359	8.63556	8.34185	8.34185	8.92926	8.92926
leukocyte > hematopoietic and immune system cell > Cell type	leukocyte		62	8.7418	0.703348	8.63269	7.64039	8.09977	9.33802	10.6886
inguinal mammary gland > inguinal > other body part > Tissue	inguinal mammary gland		3	8.66293	0.178275	8.6185	8.51108	8.51108	8.85922	8.85922
trachea > respiratory system > Tissue	trachea		8	8.64773	0.0969266	8.6129	8.53524	8.59003	8.7765	8.78996
colon > colorectum > large intestine > intestine > gastrointestinal tract > alimentary system > Tissue	colon		56	8.62584	0.490074	8.6009	8.0439	8.47561	8.77238	8.98536
brain microglia cell > microglia cell > glia cell > central nervous system cell > nervous system cell > Cell type	brain microglia cell		5	8.7826	0.466517	8.59671	8.26219	8.50251	9.2647	9.28688
sciatic nerve > peripheral nerve > peripheral nervous system (PNS) > nervous system > Tissue	sciatic nerve		48	8.66737	0.596761	8.59223	7.52943	8.21917	9.1051	9.8398
megakaryocyte-erythroid (MEP) progenitor cell (unspecified) > hematopoietic stem / progenitor cell > hematopoietic and immune system cell > Cell type	megakaryocyte-erythroid (MEP) progenitor cell (unspecified)		2	8.58254	0.0201974	8.58254	8.56826	8.56826	8.59682	8.59682
tracheal basal cell > tracheal epithelium cell > tracheal mucosa cell > trachea cell > respiratory system cell > Cell type	tracheal basal cell		3	8.637	0.35277	8.57497	8.31936	8.31936	9.01667	9.01667
spinal cord motor neuron > spinal cord neuron > neuron > central nervous system cell > nervous system cell > Cell type	spinal cord motor neuron		18	8.52363	0.296986	8.56814	7.82419	8.30346	8.64422	9.08834
quiescent subventricular neural stem cell > subventricular neural stem cell > lateral ventricle neural stem cell > ventricular system neural stem cell > neural stem cell > central nervous system cell > nervous system cell > Cell type	quiescent subventricular neural stem cell		3	8.55468	0.140847	8.5557	8.41333	8.41333	8.69502	8.69502
macrophage > myeloid leukocyte > leukocyte > hematopoietic and immune system cell > Cell type	macrophage		21	8.45849	0.380199	8.54639	8.0138	8.3285	8.71785	8.94761
adrenal gland > endocrine system (except testis and ovary) > Tissue	adrenal gland		5	8.68703	0.766253	8.52849	7.95093	8.10758	9.0002	9.84797
bone marrow common lymphoid progenitor (CLP) cell > bone marrow hematopoietic stem / progenitor cell > hematopoietic stem / progenitor cell > hematopoietic and immune system cell > Cell type	bone marrow common lymphoid progenitor (CLP) cell		10	8.49394	0.315062	8.52164	7.85187	8.36514	8.749	8.89539
splenic naive B-cell > naive B-cell > mature B-cell > B-cell > B-cell lineage > lymphocyte > lymphoid leukocyte > leukocyte > hematopoietic and immune system cell > Cell type	splenic naive B-cell	Synonym: splenic mature naive B-cell. A naive B-cell is a mature B-cell that is typically described as surface IgD-positive, surface IgM-positive, CD20-positive, CD27-negative and that has not yet been activated by antigen in the periphery.	6	8.51173	0.128912	8.51961	8.36124	8.36724	8.6458	8.65689
retinal rod cell > retinal photoreceptor cell > neuroretinal cell > retina cell > eye cell > sensory organ system cell > Cell type	retinal rod cell		31	8.48797	0.212646	8.49065	8.0608	8.3658	8.64785	8.98419
hepatocyte > hepatic epithelium cell > hepatic mucosa cell > liver cell > liver and biliary system cell > alimentary system cell > Cell type	hepatocyte		39	8.53101	0.537605	8.48808	7.70342	8.07323	8.92169	9.63731
regulatory T-cell (unspecified) > T-cell > T-cell lineage > lymphocyte > lymphoid leukocyte > leukocyte > hematopoietic and immune system cell > Cell type	regulatory T-cell (unspecified)		2	8.45068	0.0801046	8.45068	8.39403	8.39403	8.50732	8.50732
splenocyte > spleen cell > lymphoid tissue cell > hematopoietic and immune system cell > Cell type	splenocyte		66	8.47448	0.414718	8.44506	7.74126	8.14624	8.71067	9.42494
embryonic renal (kidney) inner medulla > embryonic renal (kidney) medulla > embryonic kidney > embryonic urinary system > embryo > embryonic tissue / fluid > gestational structure > Tissue	embryonic renal (kidney) inner medulla		4	8.41793	0.170108	8.44236	8.21072	8.34855	8.5763	8.5763
large intestine > intestine > gastrointestinal tract > alimentary system > Tissue	large intestine		9	8.45025	0.132613	8.44083	8.22694	8.41062	8.58965	8.60781
marginal zone B-cell > mature B-cell > B-cell > B-cell lineage > lymphocyte > lymphoid leukocyte > leukocyte > hematopoietic and immune system cell > Cell type	marginal zone B-cell	A mature B-cell that is located in the marginal zone of secondary lymphoid tissues. It is typically described as CD23-negative and CD21-positive and expressing a B-cell receptor usually reactive to bacterial cell wall components or senescent self components such as oxidized-LDL. This cell type has also been described as being CD19-positive, B220-positive, IgM-high, AA4-negative, CD35-high.	2	8.43369	0.0516545	8.43369	8.39716	8.39716	8.47021	8.47021
embryonic glomerulus > embryonic renal corpuscle > embryonic nephron > embryonic kidney > embryonic urinary system > embryo > embryonic tissue / fluid > gestational structure > Tissue	embryonic glomerulus		4	8.37846	0.124757	8.41619	8.4085	8.4085	8.4837	8.4837
medullary thymic epithelium cell > thymic medulla cell > thymic lobe cell > thymic epithelium cell > thymus cell > lymphoid tissue cell > hematopoietic and immune system cell > Cell type	medullary thymic epithelium cell		42	8.4191	0.358932	8.39607	7.72219	8.20154	8.63561	9.17909
Purkinje cell > cerebellum neuron > metencephalon neuron (unspecified) > metencephalon neuron > hindbrain neuron (unspecified) > hindbrain neuron > brain neuron > neuron > central nervous system cell > nervous system cell > Cell type	Purkinje cell		38	8.36127	0.3981	8.39415	7.74228	8.20252	8.53978	9.00874
erythroblast > myeloid cell > hematopoietic and immune system cell > Cell type	erythroblast		7	8.39754	0.0580661	8.3933	8.32975	8.32984	8.46915	8.47415
basal forebrain cholinergic neuron > basal forebrain neuron > cerebral cortex neuron (unspecified) > cerebral cortex neuron > telencephalon neuron (unspecified) > telencephalon neuron > forebrain neuron > brain neuron > neuron > central nervous system cell > nervous system cell > Cell type	basal forebrain cholinergic neuron		3	8.32538	0.327499	8.38918	7.97068	7.97068	8.61629	8.61629
embryonic S-shaped body > embryonic renal vesicle > embryonic kidney > embryonic urinary system > embryo > embryonic tissue / fluid > gestational structure > Tissue	embryonic S-shaped body		4	8.51385	0.551324	8.38614	8.0656	8.08348	9.2175	9.2175
hypothalamus > diencephalon > forebrain (prosencephalon) > brain (encephalon) > central nervous system (CNS) > nervous system > Tissue	hypothalamus		9	8.32997	0.119355	8.3834	8.10983	8.26181	8.4025	8.46389
hematopoietic stem / progenitor cell > hematopoietic and immune system cell > Cell type	hematopoietic stem / progenitor cell		9	8.36383	0.211311	8.37138	8.22742	8.26458	8.40905	8.49305
lymph node > lymphoid tissue > hematopoietic and immune system > Tissue	lymph node		2	8.36494	0.297727	8.36494	8.15441	8.15441	8.57546	8.57546
embryonic tendon cell > embryonic musculoskeletal system cell > embryonic cell > gestational structure cell > Cell type	embryonic tendon cell		9	8.35281	0.311105	8.36212	7.90737	8.10161	8.47573	8.97146
cortical layer II/III pyramidal neuron > cerebral cortex pyramidal neuron > cerebral cortex neuron > telencephalon neuron (unspecified) > telencephalon neuron > forebrain neuron > brain neuron > neuron > central nervous system cell > nervous system cell > Cell type	cortical layer II/III pyramidal neuron		3	8.32274	0.127727	8.35226	8.18284	8.18284	8.43313	8.43313
locus coeruleus neuron (unspecified) > locus coeruleus neuron > pontine tegmentum neuron (unspecified) > pontine tegmentum neuron > pons neuron (unspecified) > pons neuron > metencephalon neuron (unspecified) > metencephalon neuron > hindbrain neuron (unspecified) > hindbrain neuron > brain neuron > neuron > central nervous system cell > nervous system cell > Cell type	locus coeruleus neuron (unspecified)		12	8.28767	0.368553	8.32403	7.73159	8.04308	8.51531	8.9569
eosinophil granulocyte > granulocyte (polymorphonuclear leukocyte) > myeloid leukocyte > leukocyte > hematopoietic and immune system cell > Cell type	eosinophil granulocyte		2	8.29541	0.110087	8.29541	8.21757	8.21757	8.37326	8.37326
neutrophil granulocyte > granulocyte (polymorphonuclear leukocyte) > myeloid leukocyte > leukocyte > hematopoietic and immune system cell > Cell type	neutrophil granulocyte		2	8.29279	0.113795	8.29279	8.21233	8.21233	8.37326	8.37326
splenic natural killer cell > natural killer cell > group 1 innate lymphoid cell > innate lymphoid cell > lymphoid leukocyte > leukocyte > hematopoietic and immune system cell > Cell type	splenic natural killer cell		17	8.34364	0.595002	8.28748	7.42735	7.95181	8.9808	9.28958
splenic B-cell (unspecified) > B-cell (unspecified) > B-cell > B-cell lineage > lymphocyte > lymphoid leukocyte > leukocyte > hematopoietic and immune system cell > Cell type	splenic B-cell (unspecified)		42	8.21741	0.474856	8.28428	7.4503	7.68692	8.57024	8.91019
ovarian granulosa cell > ovarian follicle cell > ovarian cortex cell > ovary (female gonad) cell > female reproductive system cell > reproductive system cell > Cell type	ovarian granulosa cell		6	8.31877	0.207314	8.28133	8.08359	8.14563	8.54365	8.57713
embryonic renal (kidney) cortical collecting duct > embryonic renal (kidney) cortex > embryonic kidney > embryonic urinary system > embryo > embryonic tissue / fluid > gestational structure > Tissue	embryonic renal (kidney) cortical collecting duct		3	8.42386	0.344731	8.26899	8.18373	8.18373	8.81887	8.81887
bone marrow > hematopoietic and immune system > Tissue	bone marrow		12	8.24288	0.186865	8.26259	7.96884	8.10024	8.38098	8.53531
splenic CD8 T-cell (unspecified) > CD8 T-cell (unspecified) > CD8 T-cell > T-cell > T-cell lineage > lymphocyte > lymphoid leukocyte > leukocyte > hematopoietic and immune system cell > Cell type	splenic CD8 T-cell (unspecified)		47	9.01175	1.32121	8.25512	7.6799	7.94304	10.3525	11.5826
embryonic ureteral smooth muscle > embryonic ureter > embryonic urinary system > embryo > embryonic tissue / fluid > gestational structure > Tissue	embryonic ureteral smooth muscle		6	8.31691	0.759099	8.25458	7.48301	7.58969	8.82206	9.49757
extraocular muscle cell > muscle cell of head > skeletal muscle cell > musculoskeletal system cell > Cell type	extraocular muscle cell		5	8.29931	0.0993931	8.25423	8.22608	8.23783	8.31116	8.31116
brainstem cholinergic motor neuron > brainstem neuron > brain neuron > neuron > central nervous system cell > nervous system cell > Cell type	brainstem cholinergic motor neuron		6	8.31408	0.214936	8.25107	8.15649	8.19032	8.29604	8.29604
spinal cord cholinergic neuron > spinal cord neuron > neuron > central nervous system cell > nervous system cell > Cell type	spinal cord cholinergic neuron		3	8.33817	0.207401	8.24674	8.19219	8.19219	8.57558	8.57558
cerebellum basket cell > cerebellum neuron > metencephalon neuron (unspecified) > metencephalon neuron > hindbrain neuron (unspecified) > hindbrain neuron > brain neuron > neuron > central nervous system cell > nervous system cell > Cell type	cerebellum basket cell		19	8.12432	0.329981	8.24313	8.10439	8.14608	8.31207	8.39592
tibialis anterior muscle cell > tibialis muscle cell > leg muscle cell > muscle cell of lower limb > skeletal muscle cell > musculoskeletal system cell > Cell type	tibialis anterior muscle cell		6	8.24982	0.0967717	8.24177	8.1103	8.19362	8.3539	8.35755
lumbar spinal cord motor neuron > lumbar spinal cord neuron > spinal cord neuron (unspecified) > spinal cord neuron > neuron > central nervous system cell > nervous system cell > Cell type	lumbar spinal cord motor neuron		51	8.36339	0.528992	8.23079	7.52348	8.06259	8.49113	9.12153
caecum (cecum) > large intestine > intestine > gastrointestinal tract > alimentary system > Tissue	caecum (cecum)		2	8.23022	0.138228	8.23022	8.13247	8.13247	8.32796	8.32796
T-cell > T-cell lineage > lymphocyte > lymphoid leukocyte > leukocyte > hematopoietic and immune system cell > Cell type	T-cell	Synonym: T-lymphocyte.	6	8.19314	0.12457	8.23018	8.02381	8.06539	8.29893	8.31034
ocular ciliary body > uvea > eye > sensory organ system > Tissue	ocular ciliary body		2	8.22946	0.0720428	8.22946	8.17852	8.17852	8.2804	8.2804
splenic activated B-cell (unspecified) > splenic B-cell (unspecified) > B-cell (unspecified) > B-cell > B-cell lineage > lymphocyte > lymphoid leukocyte > leukocyte > hematopoietic and immune system cell > Cell type	splenic activated B-cell (unspecified)		52	8.47013	0.597057	8.22688	7.50319	7.9991	9.00571	9.65107
follicular B-cell > mature B-cell > B-cell > B-cell lineage > lymphocyte > lymphoid leukocyte > leukocyte > hematopoietic and immune system cell > Cell type	follicular B-cell	A resting mature B-cell that is typically described as IgM-positive, IgD-positive, CD23-positive and CD21-positive, and found in the B-cell follicles of the white pulp of the spleen or the cortical areas of the peripheral lymph nodes. This cell type is also described as being CD19-positive, B220-positive, AA4-negative, CD43-negative, and CD5-negative.	2	8.21746	0.0524671	8.21746	8.18036	8.18036	8.25456	8.25456
epididymal white adipose tissue > epididymis > male reproductive system > reproductive system > Tissue	epididymal white adipose tissue		6	8.21953	0.120976	8.20166	8.2009	8.2009	8.27938	8.27938
dermal fibroblast > dermis cell > skin cell > integumentary system cell > Cell type	dermal fibroblast		56	8.20663	0.355827	8.19729	7.59597	8.0031	8.43492	8.84376
lacrimal gland > lacrimal apparatus > eye > sensory organ system > Tissue	lacrimal gland		2	8.19634	0.0804573	8.19634	8.13945	8.13945	8.25323	8.25323
placental trophoblast stem cell > trophoblast > extraembryonic cell > gestational structure cell > Cell type	placental trophoblast stem cell		9	8.19473	0.156079	8.19318	7.99486	8.0574	8.35834	8.40267
white adipose tissue (white fat,WAT) > adipose tissue (fat) > connective tissue > Tissue	white adipose tissue (white fat,WAT)		40	8.35961	0.633459	8.19202	7.3746	7.93316	8.99605	9.88121
oligodendrocyte progenitor cell > glia cell > central nervous system cell > nervous system cell > Cell type	oligodendrocyte progenitor cell		2	8.19079	0.116197	8.19079	8.10863	8.10863	8.27296	8.27296
aorta smooth muscle cell > artery smooth muscle cell > vascular smooth muscle cell > blood vessel cell > vascular system cell > cardiovascular system cell > circulatory system cell > Cell type	aorta smooth muscle cell		8	8.15118	0.0967579	8.18371	8.08926	8.1372	8.22973	8.23314
lens > eye > sensory organ system > Tissue	lens		8	8.18435	0.231463	8.18215	7.86357	8.14629	8.42227	8.48301
lymph node CD4 regulatory T-cell (unspecified) > CD4 regulatory T-cell (unspecified) > CD4 regulatory T-cell > CD4 T-cell > T-cell > T-cell lineage > lymphocyte > lymphoid leukocyte > leukocyte > hematopoietic and immune system cell > Cell type	lymph node CD4 regulatory T-cell (unspecified)		6	8.16907	0.0587382	8.18019	8.08704	8.12226	8.21898	8.22579
crypt large intestinal epithelium > large intestinal epithelium > large intestinal mucosa > large intestine > intestine > gastrointestinal tract > alimentary system > Tissue	crypt large intestinal epithelium		12	8.18516	0.11028	8.16882	8.03711	8.12526	8.28072	8.39215
retina cell > eye cell > sensory organ system cell > Cell type	retina cell		31	8.18543	0.226408	8.16822	7.715	8.04319	8.28351	8.63807
proximal colon > colon > colorectum > large intestine > intestine > gastrointestinal tract > alimentary system > Tissue	proximal colon		6	8.17336	0.183206	8.16731	7.90081	8.06232	8.337	8.40544
embryo > embryonic tissue / fluid > gestational structure > Tissue	embryo		23	8.3882	0.647534	8.16259	7.47679	7.81724	9.08076	9.5785
amygdala > temporal lobe > cerebral cortex lobe / region > cerebral cortex (neopallium) > cerebral hemisphere > telencephalon (cerebrum) > forebrain (prosencephalon) > brain (encephalon) > central nervous system (CNS) > nervous system > Tissue	amygdala		26	8.16727	0.113021	8.16055	7.87547	8.1004	8.2564	8.35922
embryonic ovary > embryo > embryonic tissue / fluid > gestational structure > Tissue	embryonic ovary		44	8.20443	0.381848	8.15032	7.59104	7.89476	8.50239	9.17235
oligodendrocyte > glia cell > central nervous system cell > nervous system cell > Cell type	oligodendrocyte		4	8.14765	0.0784777	8.14846	8.07109	8.08932	8.2226	8.2226
villus large intestinal epithelium > large intestinal epithelium > large intestinal mucosa > large intestine > intestine > gastrointestinal tract > alimentary system > Tissue	villus large intestinal epithelium		12	8.15284	0.0913712	8.1477	7.98675	8.09966	8.23453	8.33485
embryonic lung > embryo > embryonic tissue / fluid > gestational structure > Tissue	embryonic lung		35	8.11094	0.281557	8.14603	7.65464	8.02392	8.30017	8.46915
iris > uvea > eye > sensory organ system > Tissue	iris		2	8.14023	0.11929	8.14023	8.05588	8.05588	8.22458	8.22458
optic cup (eyecup) > optic disk (optic nerve head) > eye > sensory organ system > Tissue	optic cup (eyecup)		2	8.12581	0.247228	8.12581	7.95099	7.95099	8.30063	8.30063
hepatic stellate cell > liver cell > liver and biliary system cell > alimentary system cell > Cell type	hepatic stellate cell		17	8.23053	0.366819	8.12531	7.79812	7.99362	8.3981	8.69752
breast (mammary gland) stroma > breast (mammary gland) > trunk > other body part > Tissue	breast (mammary gland) stroma		6	8.09992	0.35121	8.12273	7.58969	7.8399	8.44655	8.47792
conventional dendritic cell > dendritic cell > leukocyte > hematopoietic and immune system cell > Cell type	conventional dendritic cell	Synonyms: classical dendritic cell, myeloid dendritic cell. Typically described as CD11c-high.	2	8.12264	0.150297	8.12264	8.01636	8.01636	8.22892	8.22892
epididymis > male reproductive system > reproductive system > Tissue	epididymis		3	8.16659	0.206071	8.11744	7.98954	7.98954	8.39279	8.39279
hair follicle > hair > skin appendage > skin > integumentary system > Tissue	hair follicle		2	8.09661	0.186974	8.09661	7.9644	7.9644	8.22882	8.22882
cerebral cortex astrocyte > telencephalon astrocyte > forebrain astrocyte > brain astrocyte (unspecified) > astrocyte (unspecified) > astrocyte > glia cell > central nervous system cell > nervous system cell > Cell type	cerebral cortex astrocyte		73	8.27427	0.638275	8.08624	6.99639	7.86344	8.7387	9.53765
pancreatic islet (islet of Langerhans) > pancreas > alimentary system > Tissue	pancreatic islet (islet of Langerhans)		28	8.40524	0.758219	8.08624	7.26997	7.77808	9.30811	9.68452
cuboidal alveolar type 2 cell (AT2) > pneumocyte > alveolar epithelium cell > alveolar cell > alveolar sac cell > bronchoalveolar system cell > lung cell > respiratory system cell > Cell type	cuboidal alveolar type 2 cell (AT2)		18	8.41055	1.29751	8.08171	7.00731	7.25635	9.92362	10.4548
bone > skeletal system (except bone marrow) > musculoskeletal system > Tissue	bone		2	8.0811	0.117318	8.0811	7.99814	7.99814	8.16405	8.16405
pituitary gland (hypophysis) > endocrine system (except testis and ovary) > Tissue	pituitary gland (hypophysis)		9	8.08907	0.353946	8.08055	7.53123	7.98681	8.42538	8.56685
embryonic retina > embryonic eye > embryonic sensory organ system > embryo > embryonic tissue / fluid > gestational structure > Tissue	embryonic retina		14	8.12436	0.345642	8.07872	7.60437	7.87572	8.36448	8.73274
cortical layer VI pyramidal neuron > cerebral cortex pyramidal neuron > cerebral cortex neuron > telencephalon neuron (unspecified) > telencephalon neuron > forebrain neuron > brain neuron > neuron > central nervous system cell > nervous system cell > Cell type	cortical layer VI pyramidal neuron		6	8.087	0.145778	8.07407	7.89051	7.98459	8.20482	8.29393
stomach > gastrointestinal tract > alimentary system > Tissue	stomach		2	8.06919	0.0927608	8.06919	8.0036	8.0036	8.13479	8.13479
lymph node plasmacytoid dendritic cell > plasmacytoid dendritic cell > dendritic cell > leukocyte > hematopoietic and immune system cell > Cell type	lymph node plasmacytoid dendritic cell	Synonyms: lymph node lymphoid dendritic cell, lymph node interferon-producing dendritic cell. A dendritic cell type of distinct morphology, localization, and surface marker expression from other dendritic cell types and associated with early stage immune responses, particularly the release of physiologically abundant amounts of type I interferons in response to infection.	1	8.05175	NaN	8.05175	8.05175	8.05175	8.05175	8.05175
protoplasmic astrocyte > astrocyte > glia cell > central nervous system cell > nervous system cell > Cell type	protoplasmic astrocyte		2	8.04428	0.131186	8.04428	7.95152	7.95152	8.13704	8.13704
lung > respiratory system > Tissue	lung		1509	8.0503	0.591144	8.0427	6.54659	7.61985	8.42181	9.60483
embryonic liver > embryo > embryonic tissue / fluid > gestational structure > Tissue	embryonic liver		76	7.89551	0.384425	8.04053	7.07543	7.57425	8.22424	8.42605
Bergmann glia cell > cerebellum astrocyte > metencephalon astrocyte > hindbrain astrocyte > brain astrocyte (unspecified) > astrocyte (unspecified) > astrocyte > glia cell > central nervous system cell > nervous system cell > Cell type	Bergmann glia cell		3	7.99222	0.10964	8.03733	7.86722	7.86722	8.07211	8.07211
embryonic stem cell > embryonic cell > gestational structure cell > Cell type	embryonic stem cell		2	8.02435	0.0697308	8.02435	7.97505	7.97505	8.07366	8.07366
colonic mucosa > colon > colorectum > large intestine > intestine > gastrointestinal tract > alimentary system > Tissue	colonic mucosa		28	8.00633	0.247325	8.0202	7.61043	7.7807	8.15644	8.59976
embryonic testis > embryo > embryonic tissue / fluid > gestational structure > Tissue	embryonic testis		48	8.08577	0.370985	8.01385	7.43045	7.8069	8.45158	8.85807
embryonic epididymis > embryo > embryonic tissue / fluid > gestational structure > Tissue	embryonic epididymis		11	8.02566	0.295363	7.99509	7.52802	7.78581	8.18651	8.54655
renal (kidney) cortex > kidney > urinary system > Tissue	renal (kidney) cortex		43	8.24147	0.807709	7.99469	7.14558	7.58067	8.9025	9.86051
urinary bladder > urinary system > Tissue	urinary bladder		20	8.15547	0.458106	7.98567	7.81256	7.9384	8.22497	8.39545
subventricular neural stem cell > lateral ventricle neural stem cell > ventricular system neural stem cell > neural stem cell > central nervous system cell > nervous system cell > Cell type	subventricular neural stem cell		8	8.05354	0.68054	7.98391	7.28845	7.78914	8.31384	8.31384
embryonic basal ganglia > embryonic cerebral hemisphere > embryonic telencephalon (cerebrum) > embryonic forebrain (prosencephalon) > embryonic brain > embryo > embryonic tissue / fluid > gestational structure > Tissue	embryonic basal ganglia		4	8.04058	0.195776	7.98108	7.87964	7.93846	8.32053	8.32053
embryonic radial glia cell > embryonic glia cell > embryonic central nervous system cell > embryonic nervous system cell > embryonic cell > gestational structure cell > Cell type	embryonic radial glia cell		16	8.02391	0.182663	7.97212	7.77854	7.90153	8.16294	8.39279
dorsal striatum > striatum > corpus striatum > basal ganglia > cerebral hemisphere > telencephalon (cerebrum) > forebrain (prosencephalon) > brain (encephalon) > central nervous system (CNS) > nervous system > Tissue	dorsal striatum		2	7.97069	0.106866	7.97069	7.89512	7.89512	8.04625	8.04625
spinal ganglion (dorsal root ganglion) > peripheral nervous system (PNS) > nervous system > Tissue	spinal ganglion (dorsal root ganglion)		2	7.96555	0.012611	7.96555	7.95664	7.95664	7.97447	7.97447
lymph node natural killer cell > natural killer cell > group 1 innate lymphoid cell > innate lymphoid cell > lymphoid leukocyte > leukocyte > hematopoietic and immune system cell > Cell type	lymph node natural killer cell		1	7.96434	NaN	7.96434	7.96434	7.96434	7.96434	7.96434
liver > liver and biliary system > alimentary system > Tissue	liver		2126	7.99649	0.456624	7.96223	6.89385	7.72492	8.27961	9.09519
heart ventricle > heart muscle (myocardium, cardiac muscle) > heart > cardiovascular system > circulatory system > Tissue	heart ventricle		29	7.91362	0.154841	7.96029	7.59111	7.78797	7.98863	8.04674
cerebral cortex oligodendrocyte progenitor cell > telencephalon oligodendrocyte progenitor cell > forebrain oligodendrocyte progenitor cell > brain oligodendrocyte progenitor cell > oligodendrocyte progenitor cell > glia cell > central nervous system cell > nervous system cell > Cell type	cerebral cortex oligodendrocyte progenitor cell		3	7.8782	0.203521	7.95989	7.64652	7.64652	8.02818	8.02818
skeletal muscle satellite (stem) cell > skeletal muscle cell > musculoskeletal system cell > Cell type	skeletal muscle satellite (stem) cell		14	7.9499	0.15834	7.95846	7.7211	7.8198	8.06598	8.27566
uterine horn > uterus > female reproductive system > reproductive system > Tissue	uterine horn		6	7.9563	0.0839985	7.95823	7.94292	7.94292	7.98652	7.98652
blastocyst cell > embryonic structure cell > embryonic cell > gestational structure cell > Cell type	blastocyst cell		19	8.08332	0.544729	7.95635	7.6367	7.78084	8.08523	8.47642
CA1 hippocampus > cornu ammonis (hippocampus proper) > hippocampus > temporal lobe > cerebral cortex lobe / region > cerebral cortex (neopallium) > cerebral hemisphere > telencephalon (cerebrum) > forebrain (prosencephalon) > brain (encephalon) > central nervous system (CNS) > nervous system > Tissue	CA1 hippocampus		27	7.9567	0.233936	7.95099	7.82649	7.90515	8.08683	8.24745
splenic CD4 T-cell (unspecified) > CD4 T-cell (unspecified) > CD4 T-cell > T-cell > T-cell lineage > lymphocyte > lymphoid leukocyte > leukocyte > hematopoietic and immune system cell > Cell type	splenic CD4 T-cell (unspecified)		26	7.9585	0.168681	7.94903	7.55658	7.84706	8.04647	8.32737
embryonic ganglionic eminence > embryonic brain > embryo > embryonic tissue / fluid > gestational structure > Tissue	embryonic ganglionic eminence		8	7.91386	0.13546	7.93115	7.71074	7.85181	8.06113	8.06894
cerebral cortex myelinating oligodendrocyte > telencephalon myelinating oligodendrocyte > forebrain myelinating oligodendrocyte > brain myelinating oligodendrocyte > myelinating oligodendrocyte > oligodendrocyte > glia cell > central nervous system cell > nervous system cell > Cell type	cerebral cortex myelinating oligodendrocyte		6	7.97076	0.204076	7.92621	7.73105	7.85661	8.06097	8.32351
cardiomyocyte (heart muscle cell) > heart cell > cardiovascular system cell > circulatory system cell > Cell type	cardiomyocyte (heart muscle cell)		6	7.9566	0.156117	7.9244	7.79753	7.87086	7.97097	7.97097
umbilical cord > extraembryonic tissue / fluid > gestational structure > Tissue	umbilical cord		2	7.9227	0.0589776	7.9227	7.88099	7.88099	7.9644	7.9644
diencephalon astrocyte > forebrain astrocyte > brain astrocyte (unspecified) > astrocyte (unspecified) > astrocyte > glia cell > central nervous system cell > nervous system cell > Cell type	diencephalon astrocyte		4	7.8273	0.280993	7.91457	7.44303	7.79214	8.03705	8.03705
striatum cholinergic neuron > striatum neuron > basal ganglia neuron (unspecified) > basal ganglia neuron > telencephalon neuron (unspecified) > telencephalon neuron > forebrain neuron > brain neuron > neuron > central nervous system cell > nervous system cell > Cell type	striatum cholinergic neuron		3	8.03665	0.304364	7.91235	7.8141	7.8141	8.38349	8.38349
cerebellum astrocyte > metencephalon astrocyte > hindbrain astrocyte > brain astrocyte (unspecified) > astrocyte (unspecified) > astrocyte > glia cell > central nervous system cell > nervous system cell > Cell type	cerebellum astrocyte		6	7.91413	0.118275	7.90776	7.80458	7.80529	7.93145	7.93145
medial preoptic area > preoptic area of hypothalamus > hypothalamus > diencephalon > forebrain (prosencephalon) > brain (encephalon) > central nervous system (CNS) > nervous system > Tissue	medial preoptic area		2	7.90701	0.113974	7.90701	7.82642	7.82642	7.98761	7.98761
embryonic cerebral cortex (neopallium) > embryonic cerebral hemisphere > embryonic telencephalon (cerebrum) > embryonic forebrain (prosencephalon) > embryonic brain > embryo > embryonic tissue / fluid > gestational structure > Tissue	embryonic cerebral cortex (neopallium)		4	7.91795	0.153506	7.9059	7.74725	7.86518	8.11275	8.11275
retinal amacrine cell > neuroretinal cell > retina cell > eye cell > sensory organ system cell > Cell type	retinal amacrine cell		25	7.93832	0.30064	7.90545	7.4407	7.77222	8.00933	8.25001
epidermis > skin > integumentary system > Tissue	epidermis		2	7.90352	0.0192574	7.90352	7.8899	7.8899	7.91713	7.91713
splenic plasmacytoid dendritic cell > plasmacytoid dendritic cell > dendritic cell > leukocyte > hematopoietic and immune system cell > Cell type	splenic plasmacytoid dendritic cell	Synonyms: splenic lymphoid dendritic cell, splenic interferon-producing dendritic cell. A dendritic cell type of distinct morphology, localization, and surface marker expression from other dendritic cell types and associated with early stage immune responses, particularly the release of physiologically abundant amounts of type I interferons in response to infection.	2	7.89817	0.648725	7.89817	7.43946	7.43946	8.35689	8.35689
embryonic renal vesicle > embryonic kidney > embryonic urinary system > embryo > embryonic tissue / fluid > gestational structure > Tissue	embryonic renal vesicle		9	7.97536	0.425423	7.89512	7.46891	7.68503	8.09872	8.41181
adipose tissue (fat) > connective tissue > Tissue	adipose tissue (fat)		3	7.88216	0.171832	7.8874	7.70777	7.70777	8.05132	8.05132
lumbar spinal ganglion (dorsal root ganglion) > spinal ganglion (dorsal root ganglion) > peripheral nervous system (PNS) > nervous system > Tissue	lumbar spinal ganglion (dorsal root ganglion)		47	7.88863	0.193434	7.88484	7.49609	7.7451	8.02697	8.26318
spleen > lymphoid tissue > hematopoietic and immune system > Tissue	spleen		61	7.80696	0.430869	7.87958	7.36221	7.72731	8.05447	8.44485
olfactory bulb > cerebral hemisphere > telencephalon (cerebrum) > forebrain (prosencephalon) > brain (encephalon) > central nervous system (CNS) > nervous system > Tissue	olfactory bulb		2	7.87905	0.0275165	7.87905	7.8596	7.8596	7.89851	7.89851
embryonic fibroblast (unspecified) > embryonic cell > gestational structure cell > Cell type	embryonic fibroblast (unspecified)		199	7.70295	0.651359	7.86648	6.42626	7.05387	8.17283	9.30608
peritoneal macrophage > macrophage > myeloid leukocyte > leukocyte > hematopoietic and immune system cell > Cell type	peritoneal macrophage		23	7.94955	0.197527	7.86419	7.69328	7.81928	8.05788	8.38785
distal colon > colon > colorectum > large intestine > intestine > gastrointestinal tract > alimentary system > Tissue	distal colon		32	7.85977	0.154574	7.86372	7.5047	7.76414	7.97413	8.16952
Golgi neuron > cerebellum neuron > metencephalon neuron (unspecified) > metencephalon neuron > hindbrain neuron (unspecified) > hindbrain neuron > brain neuron > neuron > central nervous system cell > nervous system cell > Cell type	Golgi neuron		3	8.01078	0.281644	7.86208	7.83466	7.83466	8.33561	8.33561
prostate (prostate gland) > male reproductive system > reproductive system > Tissue	prostate (prostate gland)		2	7.86038	0.164266	7.86038	7.74423	7.74423	7.97654	7.97654
splenic CD8 naive T-cell > CD8 naive T-cell > CD8 T-cell > T-cell > T-cell lineage > lymphocyte > lymphoid leukocyte > leukocyte > hematopoietic and immune system cell > Cell type	splenic CD8 naive T-cell		3	7.89123	0.350999	7.85798	7.55804	7.55804	8.25767	8.25767
cornea > eye > sensory organ system > Tissue	cornea		22	7.9338	0.278349	7.84627	7.58609	7.77768	7.99554	8.21043
proximal ileum > ileum > small intestine > intestine > gastrointestinal tract > alimentary system > Tissue	proximal ileum		10	7.8065	0.130515	7.84543	7.68117	7.75782	7.88503	7.94257
semilunar valve leaflet > semilunar valve > heart valve > endocardium > heart > cardiovascular system > circulatory system > Tissue	semilunar valve leaflet		4	7.8724	0.123485	7.83916	7.76527	7.80826	8.04603	8.04603
brain (encephalon) > central nervous system (CNS) > nervous system > Tissue	brain (encephalon)		191	7.822	0.345877	7.83838	7.12226	7.62899	7.97384	8.4582
embryonic heart > embryo > embryonic tissue / fluid > gestational structure > Tissue	embryonic heart		16	7.84612	0.46355	7.83178	7.2521	7.47265	8.17797	8.94342
astrocyte (unspecified) > astrocyte > glia cell > central nervous system cell > nervous system cell > Cell type	astrocyte (unspecified)		58	7.93354	0.438678	7.82761	7.06264	7.61831	8.31148	8.82451
forebrain (prosencephalon) > brain (encephalon) > central nervous system (CNS) > nervous system > Tissue	forebrain (prosencephalon)		54	7.77521	0.217511	7.82087	7.2993	7.65313	7.91325	8.27015
median eminence > diencephalon > forebrain (prosencephalon) > brain (encephalon) > central nervous system (CNS) > nervous system > Tissue	median eminence		2	7.80635	0.282925	7.80635	7.60629	7.60629	8.00641	8.00641
brain neuron > neuron > central nervous system cell > nervous system cell > Cell type	brain neuron		8	7.76082	0.197371	7.78522	7.47265	7.63851	7.93227	8.06663
uterus > female reproductive system > reproductive system > Tissue	uterus		26	7.79058	0.327152	7.77356	7.2385	7.65578	8.00562	8.18928
paneth cell > jejunal epithelium cell > jejunal mucosa cell > small intestinal mucosa cell > small intestine cell > intestine cell > gastrointestinal tract cell > alimentary system cell > Cell type	paneth cell		4	7.76786	0.0409713	7.77152	7.71431	7.77017	7.8141	7.8141
cortical layer Vb pyramidal neuron > cerebral cortex pyramidal neuron > cerebral cortex neuron > telencephalon neuron (unspecified) > telencephalon neuron > forebrain neuron > brain neuron > neuron > central nervous system cell > nervous system cell > Cell type	cortical layer Vb pyramidal neuron		3	7.74501	0.0610487	7.76726	7.67596	7.67596	7.79181	7.79181
ventromedial hypothalamic nucleus > hypothalamus > diencephalon > forebrain (prosencephalon) > brain (encephalon) > central nervous system (CNS) > nervous system > Tissue	ventromedial hypothalamic nucleus		2	7.76666	0.330865	7.76666	7.53271	7.53271	8.00062	8.00062
optic disk (optic nerve head) > eye > sensory organ system > Tissue	optic disk (optic nerve head)		60	7.80994	0.456164	7.76388	6.87701	7.52403	8.07248	8.73132
aortic root > aorta > artery > blood vessel > vascular system > cardiovascular system > circulatory system > Tissue	aortic root		6	7.93398	0.424438	7.76216	7.45582	7.70798	8.38694	8.52881
accumbens nucleus > ventral striatum > striatum > corpus striatum > basal ganglia > cerebral hemisphere > telencephalon (cerebrum) > forebrain (prosencephalon) > brain (encephalon) > central nervous system (CNS) > nervous system > Tissue	accumbens nucleus		20	7.82765	0.31827	7.73267	7.28891	7.61809	8.16847	8.42232
satellite cell derived myoblast > skeletal muscle myoblast > skeletal muscle cell > musculoskeletal system cell > Cell type	satellite cell derived myoblast		6	7.65638	0.143924	7.72582	7.40165	7.56841	7.75829	7.75829
gastrocnemius muscle > leg muscle > muscle of lower limb > skeletal muscle > musculoskeletal system > Tissue	gastrocnemius muscle		106	7.84805	0.462296	7.72107	7.13103	7.55228	8.10019	8.70487
brain conventional dendritic cell > conventional dendritic cell > dendritic cell > leukocyte > hematopoietic and immune system cell > Cell type	brain conventional dendritic cell	Synonyms: brain classical dendritic cell, brain myeloid dendritic cell. Typically described as CD11c-high.	2	7.71837	0.154423	7.71837	7.60918	7.60918	7.82757	7.82757
lateral septal nucleus > septum of brain > cerebral hemisphere > telencephalon (cerebrum) > forebrain (prosencephalon) > brain (encephalon) > central nervous system (CNS) > nervous system > Tissue	lateral septal nucleus		2	7.71619	0.283421	7.71619	7.51578	7.51578	7.9166	7.9166
cortical cortistatin interneuron > cerebral cortex interneuron > cerebral cortex neuron > telencephalon neuron (unspecified) > telencephalon neuron > forebrain neuron > brain neuron > neuron > central nervous system cell > nervous system cell > Cell type	cortical cortistatin interneuron		3	7.70753	0.21428	7.71603	7.48913	7.48913	7.91743	7.91743
duodenum > small intestine > intestine > gastrointestinal tract > alimentary system > Tissue	duodenum		2	7.71143	0	7.71143	7.71143	7.71143	7.71143	7.71143
hippocampus > temporal lobe > cerebral cortex lobe / region > cerebral cortex (neopallium) > cerebral hemisphere > telencephalon (cerebrum) > forebrain (prosencephalon) > brain (encephalon) > central nervous system (CNS) > nervous system > Tissue	hippocampus		163	7.65843	0.493912	7.71136	6.74039	7.20398	8.03166	8.59764
embryonic pancreas > embryonic alimentary system > embryo > embryonic tissue / fluid > gestational structure > Tissue	embryonic pancreas		18	7.68571	0.152576	7.70697	7.43521	7.54867	7.78188	7.96104
embryonic head > embryo > embryonic tissue / fluid > gestational structure > Tissue	embryonic head		7	7.77025	0.14989	7.70363	7.57682	7.65277	7.92831	7.97963
decidua placentalis > placenta > extraembryonic tissue / fluid > gestational structure > Tissue	decidua placentalis		18	7.74133	0.120528	7.69927	7.5979	7.65442	7.78496	7.90929
epididymal adipose tissue > gonadal adipose tissue > intraabdominal adipose tissue (abdominal visceral adipose tissue) > abdominal adipose tissue > adipose tissue (fat) > connective tissue > Tissue	epididymal adipose tissue		6	7.71204	0.159501	7.69688	7.51104	7.59664	7.8525	7.91833
striatum medium spiny neuron > striatum neuron > basal ganglia neuron (unspecified) > basal ganglia neuron > telencephalon neuron (unspecified) > telencephalon neuron > forebrain neuron > brain neuron > neuron > central nervous system cell > nervous system cell > Cell type	striatum medium spiny neuron		36	7.66687	0.226153	7.6926	7.43154	7.60548	7.75515	7.93103
neocortex > cerebral cortex (neopallium) > cerebral hemisphere > telencephalon (cerebrum) > forebrain (prosencephalon) > brain (encephalon) > central nervous system (CNS) > nervous system > Tissue	neocortex		29	7.68186	0.181431	7.6893	7.37721	7.51428	7.8247	8.09534
cochlea > osseous labyrinth > inner ear > ear > sensory organ system > Tissue	cochlea		50	7.54671	0.521869	7.67645	6.36265	7.04832	7.85	8.58909
splenic conventional dendritic cell > conventional dendritic cell > dendritic cell > leukocyte > hematopoietic and immune system cell > Cell type	splenic conventional dendritic cell	Synonyms: splenic classical dendritic cell, splenic myeloid dendritic cell. Typically described as CD11c-high.	12	7.91319	0.59161	7.67037	7.17133	7.58894	8.72069	8.81766
splenic CD8 memory T-cell (unspecified) > CD8 memory T-cell (unspecified) > CD8 memory T-cell > CD8 T-cell > T-cell > T-cell lineage > lymphocyte > lymphoid leukocyte > leukocyte > hematopoietic and immune system cell > Cell type	splenic CD8 memory T-cell (unspecified)		3	7.57702	0.294291	7.66931	7.24764	7.24764	7.8141	7.8141
embryonic intervertebral disc > embryonic cartilage > embryonic skeletal system (except bone marrow) > embryonic muscoskeletal system > embryo > embryonic tissue / fluid > gestational structure > Tissue	embryonic intervertebral disc		7	7.6427	0.134643	7.66455	7.40684	7.52677	7.75909	7.78123
cerebellum oligodendrocyte (unspecified) > metencephalon oligodendrocyte (unspecified) > hindbrain oligodendrocyte (unspecified) > brain oligodendrocyte (unspecified) > oligodendrocyte (unspecified) > oligodendrocyte > glia cell > central nervous system cell > nervous system cell > Cell type	cerebellum oligodendrocyte (unspecified)		3	7.69179	0.253316	7.66384	7.4536	7.4536	7.95791	7.95791
embryonic spinal cord > embryo > embryonic tissue / fluid > gestational structure > Tissue	embryonic spinal cord		4	7.66397	0.0643926	7.65837	7.60763	7.61021	7.73152	7.73152
embryonic cerebral cortex neuron (unspecified) > embryonic cerebral cortex neuron > embryonic telencephalon neuron (unspecified) > embryonic telencephalon neuron > embryonic forebrain neuron > embryonic brain neuron > embryonic neuron > embryonic central nervous system cell > embryonic nervous system cell > embryonic cell > gestational structure cell > Cell type	embryonic cerebral cortex neuron (unspecified)		51	7.62614	0.194931	7.65707	7.25607	7.44568	7.73268	8.05479
paraventricular nucleus > hypothalamus > diencephalon > forebrain (prosencephalon) > brain (encephalon) > central nervous system (CNS) > nervous system > Tissue	paraventricular nucleus		2	7.65166	0.133482	7.65166	7.55727	7.55727	7.74604	7.74604
terminal ileal mucosa > terminal ileum > ileum > small intestine > intestine > gastrointestinal tract > alimentary system > Tissue	terminal ileal mucosa		6	7.60142	0.102644	7.63488	7.41718	7.55182	7.67758	7.69216
renal (kidney) fibroblast > kidney cell > urinary system cell > Cell type	renal (kidney) fibroblast		6	7.88462	0.684593	7.63311	7.27966	7.54264	8.02542	8.02542
breast (mammary gland) > trunk > other body part > Tissue	breast (mammary gland)		58	7.59676	0.612002	7.63274	6.51932	6.98698	7.90659	8.85922
tumor derived oligodendrocyte progenitor cell > oligodendrocyte progenitor cell > glia cell > central nervous system cell > nervous system cell > Cell type	tumor derived oligodendrocyte progenitor cell		9	7.67954	0.264498	7.63147	7.28318	7.47054	7.90497	8.0013
arcuate hypothalamic nucleus > hypothalamus > diencephalon > forebrain (prosencephalon) > brain (encephalon) > central nervous system (CNS) > nervous system > Tissue	arcuate hypothalamic nucleus		2	7.63115	0.0516585	7.63115	7.59462	7.59462	7.66768	7.66768
cerebral cortex neuron > telencephalon neuron (unspecified) > telencephalon neuron > forebrain neuron > brain neuron > neuron > central nervous system cell > nervous system cell > Cell type	cerebral cortex neuron		3	7.6543	0.144192	7.6279	7.52513	7.52513	7.80986	7.80986
embryonic forebrain (prosencephalon) > embryonic brain > embryo > embryonic tissue / fluid > gestational structure > Tissue	embryonic forebrain (prosencephalon)		4	7.61859	0.0474979	7.62531	7.55727	7.60763	7.66647	7.66647
cerebellum myelinating oligodendrocyte > metencephalon myelinating oligodendrocyte > hindbrain myelinating oligodendrocyte > brain myelinating oligodendrocyte > myelinating oligodendrocyte > oligodendrocyte > glia cell > central nervous system cell > nervous system cell > Cell type	cerebellum myelinating oligodendrocyte		3	7.52205	0.330981	7.61831	7.1536	7.1536	7.79422	7.79422
pulmonary (lung) parenchyma > lung > respiratory system > Tissue	pulmonary (lung) parenchyma		109	7.61396	0.213324	7.6167	7.12122	7.46524	7.75709	8.0648
spinal cord astrocyte > astrocyte (unspecified) > astrocyte > glia cell > central nervous system cell > nervous system cell > Cell type	spinal cord astrocyte		12	7.64087	0.382025	7.61423	7.03507	7.41473	8.05534	8.13253
heart > cardiovascular system > circulatory system > Tissue	heart		337	7.57572	0.276158	7.61235	6.89227	7.3996	7.73998	8.20212
motor cortex fast spiking interneuron > motor cortex neuron > frontal lobe neuron (unspecified) > frontal lobe neuron > cerebral cortex neuron (unspecified) > cerebral cortex neuron > telencephalon neuron (unspecified) > telencephalon neuron > forebrain neuron > brain neuron > neuron > central nervous system cell > nervous system cell > Cell type	motor cortex fast spiking interneuron		8	7.59868	0.166779	7.61215	7.31161	7.51088	7.75054	7.77116
embryonic telencephalon (cerebrum) > embryonic forebrain (prosencephalon) > embryonic brain > embryo > embryonic tissue / fluid > gestational structure > Tissue	embryonic telencephalon (cerebrum)		10	7.66172	0.174642	7.59872	7.57213	7.57916	7.62088	7.62088
medial dorsal nucleus > thalamus (dorsal thalamus) > diencephalon > forebrain (prosencephalon) > brain (encephalon) > central nervous system (CNS) > nervous system > Tissue	medial dorsal nucleus		2	7.59761	0.0775094	7.59761	7.5428	7.5428	7.65241	7.65241
lymph node conventional dendritic cell > conventional dendritic cell > dendritic cell > leukocyte > hematopoietic and immune system cell > Cell type	lymph node conventional dendritic cell	Synonyms: lymph node classical dendritic cell, lymph node myeloid dendritic cell. Typically described as CD11c-high.	1	7.59716	NaN	7.59716	7.59716	7.59716	7.59716	7.59716
retinal pigment epithelium > retina > eye > sensory organ system > Tissue	retinal pigment epithelium		8	7.58594	0.287727	7.59666	7.18418	7.53076	7.9357	7.94163
embryonic vertebrae > embryonic bone > embryonic skeletal system (except bone marrow) > embryonic muscoskeletal system > embryo > embryonic tissue / fluid > gestational structure > Tissue	embryonic vertebrae		5	7.57439	0.147303	7.59612	7.55236	7.55236	7.64277	7.7389
embryonic small intestine > embryonic intestine > embryonic gastrointestinal tract > embryonic alimentary system > embryo > embryonic tissue / fluid > gestational structure > Tissue	embryonic small intestine		8	7.58214	0.0577963	7.59299	7.4746	7.56856	7.63227	7.64299
aortic arch > aorta > artery > blood vessel > vascular system > cardiovascular system > circulatory system > Tissue	aortic arch		32	7.58335	0.116358	7.5904	7.33655	7.49386	7.64746	7.87369
seminal vesicle > male reproductive system > reproductive system > Tissue	seminal vesicle		3	7.71061	0.24127	7.58931	7.55405	7.55405	7.98846	7.98846
pancreatic islet cell > endocrine pancreatic cell > endocrine system (except testis and ovary) cell > Cell type	pancreatic islet cell		26	7.57636	0.117704	7.57905	7.35966	7.53317	7.66427	7.76593
cerebellum unipolar brush neuron > cerebellum neuron > metencephalon neuron (unspecified) > metencephalon neuron > hindbrain neuron (unspecified) > hindbrain neuron > brain neuron > neuron > central nervous system cell > nervous system cell > Cell type	cerebellum unipolar brush neuron		3	7.60346	0.109427	7.57675	7.50985	7.50985	7.72376	7.72376
epidermal keratinocyte > epidermis cell > skin cell > integumentary system cell > Cell type	epidermal keratinocyte		20	7.63375	0.36247	7.57035	7.22689	7.40837	7.79422	8.03315
retinal amacrine cell > embryonic retina cell > embryonic eye cell > embryonic sensory organ system cell > embryonic cell > gestational structure cell > Cell type	retinal amacrine cell		1	7.57008	NaN	7.57008	7.57008	7.57008	7.57008	7.57008
quadriceps femoris muscle > thigh muscle > muscle of lower limb > skeletal muscle > musculoskeletal system > Tissue	quadriceps femoris muscle		18	7.5822	0.200172	7.56964	7.29857	7.45459	7.6916	7.9644
spinal cord > central nervous system (CNS) > nervous system > Tissue	spinal cord		119	7.68623	0.523818	7.56628	7.20701	7.43538	7.75208	8.22096
embryonic chondrocyte > embryonic cartilage cell > embryonic cell > gestational structure cell > Cell type	embryonic chondrocyte		15	7.56798	0.128148	7.5656	7.38655	7.48462	7.62564	7.65564
thoracic aorta > aorta > artery > blood vessel > vascular system > cardiovascular system > circulatory system > Tissue	thoracic aorta		10	7.59781	0.264724	7.5611	7.52677	7.52677	7.63045	7.67051
piriform cortex (prepyriform area) > cerebral cortex lobe / region > cerebral cortex (neopallium) > cerebral hemisphere > telencephalon (cerebrum) > forebrain (prosencephalon) > brain (encephalon) > central nervous system (CNS) > nervous system > Tissue	piriform cortex (prepyriform area)		2	7.55759	0.0465652	7.55759	7.52466	7.52466	7.59051	7.59051
cerebral cortex (neopallium) > cerebral hemisphere > telencephalon (cerebrum) > forebrain (prosencephalon) > brain (encephalon) > central nervous system (CNS) > nervous system > Tissue	cerebral cortex (neopallium)		82	7.57483	0.287287	7.55189	7.08958	7.34793	7.76401	8.2879
amygdala anterior > amygdala > temporal lobe > cerebral cortex lobe / region > cerebral cortex (neopallium) > cerebral hemisphere > telencephalon (cerebrum) > forebrain (prosencephalon) > brain (encephalon) > central nervous system (CNS) > nervous system > Tissue	amygdala anterior		2	7.54947	0.00680688	7.54947	7.54466	7.54466	7.55428	7.55428
eye > sensory organ system > Tissue	eye		3	7.54539	0.00760775	7.54689	7.53714	7.53714	7.55213	7.55213
embryonic vestibular ganglion cell > embryonic inner ear vestibule cell > embryonic osseous labyrinth cell > embryonic inner ear cell > embryonic ear cell > embryonic sensory organ system cell > embryonic cell > gestational structure cell > Cell type	embryonic vestibular ganglion cell		18	7.49449	0.258797	7.54612	7.041	7.28744	7.61905	7.9633
embryonic brain neuron > embryonic neuron > embryonic central nervous system cell > embryonic nervous system cell > embryonic cell > gestational structure cell > Cell type	embryonic brain neuron		18	7.55368	0.133066	7.54458	7.26031	7.4945	7.68152	7.74698
cerebellum granule neuron > cerebellum neuron > metencephalon neuron (unspecified) > metencephalon neuron > hindbrain neuron (unspecified) > hindbrain neuron > brain neuron > neuron > central nervous system cell > nervous system cell > Cell type	cerebellum granule neuron		3	7.54606	0.0438107	7.54264	7.50406	7.50406	7.59149	7.59149
primary somatosensory cortex > postcentral gyrus > parietal lobe > cerebral cortex lobe / region > cerebral cortex (neopallium) > cerebral hemisphere > telencephalon (cerebrum) > forebrain (prosencephalon) > brain (encephalon) > central nervous system (CNS) > nervous system > Tissue	primary somatosensory cortex		6	7.56736	0.0625997	7.54105	7.50946	7.52293	7.62417	7.66548
dentate gyrus > hippocampus > temporal lobe > cerebral cortex lobe / region > cerebral cortex (neopallium) > cerebral hemisphere > telencephalon (cerebrum) > forebrain (prosencephalon) > brain (encephalon) > central nervous system (CNS) > nervous system > Tissue	dentate gyrus		32	7.56675	0.207184	7.53597	7.24973	7.40888	7.68349	8.03974
medial prefrontal cortex > prefrontal cortex > frontal lobe > cerebral cortex lobe / region > cerebral cortex (neopallium) > cerebral hemisphere > telencephalon (cerebrum) > forebrain (prosencephalon) > brain (encephalon) > central nervous system (CNS) > nervous system > Tissue	medial prefrontal cortex		24	7.53127	0.19168	7.53457	7.24489	7.46181	7.61861	7.82464
inferior colliculus > corpora quadrigemia > midbrain tectum > midbrain (mesencephalon) > brain (encephalon) > central nervous system (CNS) > nervous system > Tissue	inferior colliculus		2	7.53283	0.0361903	7.53283	7.50724	7.50724	7.55842	7.55842
dorsal subparaventricular zone > subparaventricular zone > hypothalamus > diencephalon > forebrain (prosencephalon) > brain (encephalon) > central nervous system (CNS) > nervous system > Tissue	dorsal subparaventricular zone		2	7.53152	0.0893493	7.53152	7.46834	7.46834	7.5947	7.5947
ventral subparaventricular zone > subparaventricular zone > hypothalamus > diencephalon > forebrain (prosencephalon) > brain (encephalon) > central nervous system (CNS) > nervous system > Tissue	ventral subparaventricular zone		2	7.52826	0.0748633	7.52826	7.47533	7.47533	7.5812	7.5812
embryonic kidney > embryonic urinary system > embryo > embryonic tissue / fluid > gestational structure > Tissue	embryonic kidney		12	7.51303	0.0718851	7.52548	7.39994	7.4763	7.59186	7.60214
tibialis muscle > leg muscle > muscle of lower limb > skeletal muscle > musculoskeletal system > Tissue	tibialis muscle		11	7.53487	0.0795806	7.52529	7.40871	7.51987	7.59969	7.66021
habenular nucleus > epithalamus > diencephalon > forebrain (prosencephalon) > brain (encephalon) > central nervous system (CNS) > nervous system > Tissue	habenular nucleus		2	7.5138	0.245623	7.5138	7.34012	7.34012	7.68748	7.68748
central nervous system (CNS) > nervous system > Tissue	central nervous system (CNS)		12	7.53928	0.232732	7.51017	7.13853	7.43879	7.68573	8.02115
ventral anterior nucleus > ventral nuclear group > thalamus (dorsal thalamus) > diencephalon > forebrain (prosencephalon) > brain (encephalon) > central nervous system (CNS) > nervous system > Tissue	ventral anterior nucleus		2	7.50443	0.117189	7.50443	7.42156	7.42156	7.58729	7.58729
kidney > urinary system > Tissue	kidney		186	7.51137	0.268804	7.50414	6.86617	7.3419	7.69933	8.11067
salivary gland > mouth (oral cavity) > gastrointestinal tract > alimentary system > Tissue	salivary gland		79	7.51573	0.156377	7.50024	7.24508	7.42853	7.56765	7.72424
entorhinal cortex > retrohippocampal cortex > cerebral cortex lobe / region > cerebral cortex (neopallium) > cerebral hemisphere > telencephalon (cerebrum) > forebrain (prosencephalon) > brain (encephalon) > central nervous system (CNS) > nervous system > Tissue	entorhinal cortex		12	7.46965	0.195974	7.4918	7.11666	7.37269	7.55597	7.69153
embryonic skin > embryo > embryonic tissue / fluid > gestational structure > Tissue	embryonic skin		12	7.47495	0.23578	7.48968	7.12846	7.28688	7.66092	7.88588
globus pallidus > corpus striatum > basal ganglia > cerebral hemisphere > telencephalon (cerebrum) > forebrain (prosencephalon) > brain (encephalon) > central nervous system (CNS) > nervous system > Tissue	globus pallidus		2	7.48922	0.0783908	7.48922	7.43379	7.43379	7.54466	7.54466
striatum > corpus striatum > basal ganglia > cerebral hemisphere > telencephalon (cerebrum) > forebrain (prosencephalon) > brain (encephalon) > central nervous system (CNS) > nervous system > Tissue	striatum		95	7.55131	0.328209	7.48591	6.90087	7.29719	7.84975	8.24802
subventricular zone ependymal cell > lateral ventricle ependymal cell > ventricular system ependymal cell > brain ependymal cell > ependymal cell > central nervous system cell > nervous system cell > Cell type	subventricular zone ependymal cell		2	7.48502	0.551753	7.48502	7.09487	7.09487	7.87517	7.87517
medial geniculate body (medial geniculate nucleus) > metathalamus > thalamus (dorsal thalamus) > diencephalon > forebrain (prosencephalon) > brain (encephalon) > central nervous system (CNS) > nervous system > Tissue	medial geniculate body (medial geniculate nucleus)		2	7.48478	0.00512573	7.48478	7.48115	7.48115	7.4884	7.4884
retina > eye > sensory organ system > Tissue	retina		119	7.61561	0.549896	7.48398	6.78999	7.21558	7.80245	8.66534
spinal cord posterior > spinal cord > central nervous system (CNS) > nervous system > Tissue	spinal cord posterior		2	7.48372	0.0766398	7.48372	7.42953	7.42953	7.53792	7.53792
fetal region of placenta > placenta > extraembryonic tissue / fluid > gestational structure > Tissue	fetal region of placenta		26	7.51115	0.12591	7.4789	7.27408	7.43754	7.57448	7.74147
mammillary body > posterior hypothalamic region > hypothalamus > diencephalon > forebrain (prosencephalon) > brain (encephalon) > central nervous system (CNS) > nervous system > Tissue	mammillary body		2	7.4652	0.151117	7.4652	7.35834	7.35834	7.57206	7.57206
neural crest cell > embryonic peripheral nervous system cell > embryonic nervous system cell > embryonic cell > gestational structure cell > Cell type	neural crest cell		3	7.61749	0.39293	7.45302	7.33351	7.33351	8.06593	8.06593
embryonic dorsal root ganglion cell > embryonic peripheral nervous system cell > embryonic nervous system cell > embryonic cell > gestational structure cell > Cell type	embryonic dorsal root ganglion cell	Synonyms: embryonic spinal ganglion cell, embryonic posterior root ganglion cell.	3	7.44746	0.0201347	7.45286	7.42517	7.42517	7.46434	7.46434
dorsomedial hypothalamic nucleus > hypothalamus > diencephalon > forebrain (prosencephalon) > brain (encephalon) > central nervous system (CNS) > nervous system > Tissue	dorsomedial hypothalamic nucleus		2	7.44921	0.0393422	7.44921	7.42139	7.42139	7.47703	7.47703
tibialis anterior muscle > tibialis muscle > leg muscle > muscle of lower limb > skeletal muscle > musculoskeletal system > Tissue	tibialis anterior muscle		6	7.43226	0.0470498	7.4482	7.42105	7.42105	7.45039	7.48123
lateral hypothalamus > hypothalamus > diencephalon > forebrain (prosencephalon) > brain (encephalon) > central nervous system (CNS) > nervous system > Tissue	lateral hypothalamus		2	7.44773	0.18737	7.44773	7.31524	7.31524	7.58022	7.58022
brain microvessel > microvessel > blood vessel > vascular system > cardiovascular system > circulatory system > Tissue	brain microvessel		6	7.4913	0.151315	7.44666	7.32715	7.40999	7.55651	7.76082
embryonic spiral ganglion neuron > embryonic cochlea cell > embryonic osseous labyrinth cell > embryonic inner ear cell > embryonic ear cell > embryonic sensory organ system cell > embryonic cell > gestational structure cell > Cell type	embryonic spiral ganglion neuron		22	7.44979	0.213326	7.44617	7.11821	7.35244	7.56033	7.83207
cingulate cortex > cerebral cortex lobe / region > cerebral cortex (neopallium) > cerebral hemisphere > telencephalon (cerebrum) > forebrain (prosencephalon) > brain (encephalon) > central nervous system (CNS) > nervous system > Tissue	cingulate cortex		2	7.44545	0.0840213	7.44545	7.38603	7.38603	7.50486	7.50486
embryonic callosal projection neuron > embryonic cerebral cortex neuron > embryonic telencephalon neuron (unspecified) > embryonic telencephalon neuron > embryonic forebrain neuron > embryonic brain neuron > embryonic neuron > embryonic central nervous system cell > embryonic nervous system cell > embryonic cell > gestational structure cell > Cell type	embryonic callosal projection neuron		2	7.4453	0.405363	7.4453	7.15866	7.15866	7.73193	7.73193
dorsal tegmental nucleus > midbrain tegmentum > cerebral peduncle > midbrain (mesencephalon) > brain (encephalon) > central nervous system (CNS) > nervous system > Tissue	dorsal tegmental nucleus		2	7.44439	0.00415871	7.44439	7.44145	7.44145	7.44733	7.44733
heart left ventricle > heart ventricle > heart muscle (myocardium, cardiac muscle) > heart > cardiovascular system > circulatory system > Tissue	heart left ventricle		156	7.44162	0.412644	7.43583	6.61912	7.14456	7.66867	8.45113
supraoptic nucleus > hypothalamus > diencephalon > forebrain (prosencephalon) > brain (encephalon) > central nervous system (CNS) > nervous system > Tissue	supraoptic nucleus		2	7.43312	0.138847	7.43312	7.33494	7.33494	7.5313	7.5313
periaqueductal grey (central grey substance of midbrain) > cerebral peduncle > midbrain (mesencephalon) > brain (encephalon) > central nervous system (CNS) > nervous system > Tissue	periaqueductal grey (central grey substance of midbrain)		2	7.42951	0.0899795	7.42951	7.36588	7.36588	7.49313	7.49313
CA2/CA3 hippocampus > cornu ammonis (hippocampus proper) > hippocampus > temporal lobe > cerebral cortex lobe / region > cerebral cortex (neopallium) > cerebral hemisphere > telencephalon (cerebrum) > forebrain (prosencephalon) > brain (encephalon) > central nervous system (CNS) > nervous system > Tissue	CA2/CA3 hippocampus		2	7.42585	0.00118652	7.42585	7.42501	7.42501	7.42668	7.42668
superior colliculus > corpora quadrigemia > midbrain tectum > midbrain (mesencephalon) > brain (encephalon) > central nervous system (CNS) > nervous system > Tissue	superior colliculus		2	7.42228	0.0218267	7.42228	7.40684	7.40684	7.43771	7.43771
diaphragm muscle > chest muscle > muscle of torso > skeletal muscle > musculoskeletal system > Tissue	diaphragm muscle		7	7.56957	0.217091	7.41929	7.36851	7.3972	7.82795	7.84467
placenta > extraembryonic tissue / fluid > gestational structure > Tissue	placenta		31	7.43279	0.261174	7.41667	6.99118	7.215	7.62739	7.93493
midbrain (mesencephalon) > brain (encephalon) > central nervous system (CNS) > nervous system > Tissue	midbrain (mesencephalon)		23	7.41205	0.13726	7.41659	7.14211	7.33441	7.47298	7.60748
pancreas > alimentary system > Tissue	pancreas		8	7.6547	0.544207	7.41645	7.29039	7.35852	8.06086	8.85988
small intestinal epithelium cell > small intestinal mucosa cell > small intestine cell > intestine cell > gastrointestinal tract cell > alimentary system cell > Cell type	small intestinal epithelium cell		6	7.3854	0.184917	7.41124	7.17842	7.18031	7.46646	7.66477
substantia nigra > midbrain (mesencephalon) > brain (encephalon) > central nervous system (CNS) > nervous system > Tissue	substantia nigra		2	7.41083	0.00347695	7.41083	7.40837	7.40837	7.41329	7.41329
cerebellar microvessel > brain microvessel > microvessel > blood vessel > vascular system > cardiovascular system > circulatory system > Tissue	cerebellar microvessel		6	7.40966	0.160189	7.40859	7.18933	7.30624	7.54944	7.59574
soleus muscle > leg muscle > muscle of lower limb > skeletal muscle > musculoskeletal system > Tissue	soleus muscle		6	7.39649	0.0882649	7.40429	7.24413	7.36833	7.45426	7.50367
skin > integumentary system > Tissue	skin		252	7.38025	0.469436	7.40271	6.5245	7.13011	7.56278	8.14359
cerebellar nucleus > cerebellum > metencephalon > hindbrain (rhombencephalon) > brain (encephalon) > central nervous system (CNS) > nervous system > Tissue	cerebellar nucleus		2	7.40226	0.0536657	7.40226	7.36431	7.36431	7.4402	7.4402
medial vestibular nucleus > vestibular nuclear complex (vestibular nuclei) > medulla oblongata > myelencephalon > hindbrain (rhombencephalon) > brain (encephalon) > central nervous system (CNS) > nervous system > Tissue	medial vestibular nucleus		2	7.40167	0.125047	7.40167	7.31325	7.31325	7.49009	7.49009
primary somatosensory cortex fast spiking interneuron > primary somatosensory cortex neuron > postcentral gyrus neuron (unspecified) > postcentral gyrus neuron > parietal lobe neuron (unspecified) > parietal lobe neuron > cerebral cortex neuron (unspecified) > cerebral cortex neuron > telencephalon neuron (unspecified) > telencephalon neuron > forebrain neuron > brain neuron > neuron > central ne…	primary somatosensory cortex fast spiking interneuron		15	7.44928	0.31122	7.40045	7.20965	7.31596	7.66598	7.99215
suprachiasmatic nucleus > hypothalamus > diencephalon > forebrain (prosencephalon) > brain (encephalon) > central nervous system (CNS) > nervous system > Tissue	suprachiasmatic nucleus		2	7.39799	0.0909381	7.39799	7.33369	7.33369	7.4623	7.4623
olfactory bulb anterior > olfactory bulb > cerebral hemisphere > telencephalon (cerebrum) > forebrain (prosencephalon) > brain (encephalon) > central nervous system (CNS) > nervous system > Tissue	olfactory bulb anterior		2	7.39701	0.0487184	7.39701	7.36256	7.36256	7.43146	7.43146
corticospinal motor neuron > cerebral cortex neuron > telencephalon neuron (unspecified) > telencephalon neuron > forebrain neuron > brain neuron > neuron > central nervous system cell > nervous system cell > Cell type	corticospinal motor neuron		6	7.38171	0.0802233	7.39649	7.27109	7.30579	7.4494	7.47102
pineal gland (pineal body) > endocrine system (except testis and ovary) > Tissue	pineal gland (pineal body)		2	7.38644	0.0623632	7.38644	7.34234	7.34234	7.43054	7.43054
embryonic small intestinal mesenchyme > embryonic small intestine > embryonic intestine > embryonic gastrointestinal tract > embryonic alimentary system > embryo > embryonic tissue / fluid > gestational structure > Tissue	embryonic small intestinal mesenchyme		9	7.36484	0.0803148	7.38033	7.21781	7.31388	7.4165	7.48261
leg muscle > muscle of lower limb > skeletal muscle > musculoskeletal system > Tissue	leg muscle		26	7.39508	0.12814	7.37872	7.12877	7.30979	7.49001	7.7301
embryonic hippocampus neuron > embryonic temporal lobe neuron (unspecified) > embryonic temporal lobe neuron > embryonic cerebral cortex neuron (unspecified) > embryonic cerebral cortex neuron > embryonic telencephalon neuron (unspecified) > embryonic telencephalon neuron > embryonic forebrain neuron > embryonic brain neuron > embryonic neuron > embryonic central nervous system cell > embryonic n…	embryonic hippocampus neuron		45	7.34506	0.169815	7.37799	6.95536	7.24422	7.44543	7.70736
spinal cord anterior > spinal cord > central nervous system (CNS) > nervous system > Tissue	spinal cord anterior		2	7.37794	0.0808741	7.37794	7.32076	7.32076	7.43513	7.43513
aorta > artery > blood vessel > vascular system > cardiovascular system > circulatory system > Tissue	aorta		93	7.40855	0.217241	7.37156	7.04909	7.25484	7.5299	7.91725
amygdala posterior > amygdala > temporal lobe > cerebral cortex lobe / region > cerebral cortex (neopallium) > cerebral hemisphere > telencephalon (cerebrum) > forebrain (prosencephalon) > brain (encephalon) > central nervous system (CNS) > nervous system > Tissue	amygdala posterior		2	7.36104	0.103957	7.36104	7.28753	7.28753	7.43455	7.43455
ventral subiculum > subiculum > subicular complex > hippocampus > temporal lobe > cerebral cortex lobe / region > cerebral cortex (neopallium) > cerebral hemisphere > telencephalon (cerebrum) > forebrain (prosencephalon) > brain (encephalon) > central nervous system (CNS) > nervous system > Tissue	ventral subiculum		2	7.35303	0.104161	7.35303	7.27938	7.27938	7.42668	7.42668
ileum > small intestine > intestine > gastrointestinal tract > alimentary system > Tissue	ileum		39	7.42327	0.745031	7.34101	6.53232	6.67398	8.20124	8.47525
ventral tegmental area > midbrain tegmentum > cerebral peduncle > midbrain (mesencephalon) > brain (encephalon) > central nervous system (CNS) > nervous system > Tissue	ventral tegmental area		2	7.33943	0.0467978	7.33943	7.30633	7.30633	7.37252	7.37252
olfactory bulb posterior > olfactory bulb > cerebral hemisphere > telencephalon (cerebrum) > forebrain (prosencephalon) > brain (encephalon) > central nervous system (CNS) > nervous system > Tissue	olfactory bulb posterior		2	7.33416	0.0376773	7.33416	7.30752	7.30752	7.3608	7.3608
cerebral cortex cholecystokinin neuron > cerebral cortex neuron > telencephalon neuron (unspecified) > telencephalon neuron > forebrain neuron > brain neuron > neuron > central nervous system cell > nervous system cell > Cell type	cerebral cortex cholecystokinin neuron		3	7.3146	0.0918575	7.33199	7.21529	7.21529	7.39652	7.39652
small intestine > intestine > gastrointestinal tract > alimentary system > Tissue	small intestine		132	7.35013	0.19194	7.33144	6.93216	7.23697	7.45253	7.76089
adrenal gland medulla (adrenal medulla) cell > adrenal gland cell > endocrine system (except testis and ovary) cell > Cell type	adrenal gland medulla (adrenal medulla) cell		3	7.44122	0.320116	7.32463	7.19574	7.19574	7.80329	7.80329
motor cortex > frontal lobe > cerebral cortex lobe / region > cerebral cortex (neopallium) > cerebral hemisphere > telencephalon (cerebrum) > forebrain (prosencephalon) > brain (encephalon) > central nervous system (CNS) > nervous system > Tissue	motor cortex		2	7.32013	0.159688	7.32013	7.20721	7.20721	7.43304	7.43304
olfactory tubercle > cerebral hemisphere > telencephalon (cerebrum) > forebrain (prosencephalon) > brain (encephalon) > central nervous system (CNS) > nervous system > Tissue	olfactory tubercle		2	7.31586	0.00819537	7.31586	7.31007	7.31007	7.32166	7.32166
sclerotome cell > embryonic structure cell > embryonic cell > gestational structure cell > Cell type	sclerotome cell		9	7.24184	0.276375	7.30998	6.86109	6.96648	7.40914	7.64032
B-cell > B-cell lineage > lymphocyte > lymphoid leukocyte > leukocyte > hematopoietic and immune system cell > Cell type	B-cell		16	7.39264	0.331612	7.30043	7.02923	7.17423	7.55152	8.06926
ventral posterior nucleus > ventral nuclear group > thalamus (dorsal thalamus) > diencephalon > forebrain (prosencephalon) > brain (encephalon) > central nervous system (CNS) > nervous system > Tissue	ventral posterior nucleus		2	7.29622	0.024079	7.29622	7.27919	7.27919	7.31325	7.31325
parotid gland > salivary gland > mouth (oral cavity) > gastrointestinal tract > alimentary system > Tissue	parotid gland		4	7.32247	0.0842062	7.29562	7.25361	7.28965	7.44501	7.44501
femur > upper leg bone > leg bone > bone > skeletal system (except bone marrow) > musculoskeletal system > Tissue	femur		16	7.2979	0.25984	7.28891	6.83314	7.16038	7.50835	7.83257
cerebellar neural progenitor cell > neural progenitor cell > central nervous system cell > nervous system cell > Cell type	cerebellar neural progenitor cell		4	7.29022	0.178091	7.28128	7.08799	7.22815	7.51033	7.51033
retrosplenial cortex > cerebral cortex lobe / region > cerebral cortex (neopallium) > cerebral hemisphere > telencephalon (cerebrum) > forebrain (prosencephalon) > brain (encephalon) > central nervous system (CNS) > nervous system > Tissue	retrosplenial cortex		2	7.2733	0.0862958	7.2733	7.21228	7.21228	7.33432	7.33432
medial caudate-putamen complex > caudate-putamen complex > dorsal striatum > striatum > corpus striatum > basal ganglia > cerebral hemisphere > telencephalon (cerebrum) > forebrain (prosencephalon) > brain (encephalon) > central nervous system (CNS) > nervous system > Tissue	medial caudate-putamen complex		2	7.27262	0.282658	7.27262	7.07275	7.07275	7.47249	7.47249
pontine nucleus (pontine nuclear complex) > basal part of pons > pons > metencephalon > hindbrain (rhombencephalon) > brain (encephalon) > central nervous system (CNS) > nervous system > Tissue	pontine nucleus (pontine nuclear complex)		2	7.26854	0.0847961	7.26854	7.20858	7.20858	7.3285	7.3285
embryonic heart atrium > embryonic heart muscle (myocardium, cardiac muscle) > embryonic heart > embryo > embryonic tissue / fluid > gestational structure > Tissue	embryonic heart atrium		15	7.27057	0.0700257	7.26379	7.16551	7.21675	7.3175	7.43438
cerebellum > metencephalon > hindbrain (rhombencephalon) > brain (encephalon) > central nervous system (CNS) > nervous system > Tissue	cerebellum		52	7.27299	0.220607	7.25514	6.94708	7.11925	7.38224	7.73322
cerebellar cortex lobe > cerebellar cortex > cerebellum > metencephalon > hindbrain (rhombencephalon) > brain (encephalon) > central nervous system (CNS) > nervous system > Tissue	cerebellar cortex lobe		2	7.25271	0.132288	7.25271	7.15916	7.15916	7.34625	7.34625
embryonic neocortical progenitor cell > embryonic brain neural progenitor cell > embryonic neural progenitor cell > embryonic central nervous system cell > embryonic nervous system cell > embryonic cell > gestational structure cell > Cell type	embryonic neocortical progenitor cell		14	7.26566	0.269592	7.24985	6.86059	7.02857	7.46295	7.69181
cerebral cortex callosal projection neuron > cerebral cortex neuron > telencephalon neuron (unspecified) > telencephalon neuron > forebrain neuron > brain neuron > neuron > central nervous system cell > nervous system cell > Cell type	cerebral cortex callosal projection neuron		6	7.24352	0.102428	7.24683	7.09434	7.17891	7.30095	7.39326
corticotectal projection neuron > cerebral cortex neuron > telencephalon neuron (unspecified) > telencephalon neuron > forebrain neuron > brain neuron > neuron > central nervous system cell > nervous system cell > Cell type	corticotectal projection neuron		2	7.24323	0.193161	7.24323	7.10664	7.10664	7.37981	7.37981
vermis > cerebellum > metencephalon > hindbrain (rhombencephalon) > brain (encephalon) > central nervous system (CNS) > nervous system > Tissue	vermis		2	7.23915	0.0945	7.23915	7.17233	7.17233	7.30597	7.30597
ear > sensory organ system > Tissue	ear		12	7.24328	0.0967798	7.23414	7.09371	7.16902	7.3458	7.39257
lateral caudate-putamen complex > caudate-putamen complex > dorsal striatum > striatum > corpus striatum > basal ganglia > cerebral hemisphere > telencephalon (cerebrum) > forebrain (prosencephalon) > brain (encephalon) > central nervous system (CNS) > nervous system > Tissue	lateral caudate-putamen complex		2	7.21289	0.22427	7.21289	7.05431	7.05431	7.37147	7.37147
embryonic heart ventricle > embryonic heart muscle (myocardium, cardiac muscle) > embryonic heart > embryo > embryonic tissue / fluid > gestational structure > Tissue	embryonic heart ventricle		19	7.21269	0.110918	7.2116	7.14537	7.18864	7.28216	7.38448
type A spermatogonium > spermatogonium (spermatogonial stem cell) > male germ cell > male reproductive system cell > reproductive system cell > Cell type	type A spermatogonium		2	7.2097	0.355259	7.2097	6.95849	6.95849	7.46091	7.46091
cerebellar neural stem cell > neural stem cell > central nervous system cell > nervous system cell > Cell type	cerebellar neural stem cell		8	7.15123	0.255257	7.19838	6.70888	6.99955	7.30478	7.53846
embryonic corticospinal motor neuron > embryonic cerebral cortex neuron > embryonic telencephalon neuron (unspecified) > embryonic telencephalon neuron > embryonic forebrain neuron > embryonic brain neuron > embryonic neuron > embryonic central nervous system cell > embryonic nervous system cell > embryonic cell > gestational structure cell > Cell type	embryonic corticospinal motor neuron		1	7.19121	NaN	7.19121	7.19121	7.19121	7.19121	7.19121
plasmacytoid dendritic cell > dendritic cell > leukocyte > hematopoietic and immune system cell > Cell type	plasmacytoid dendritic cell	Synonyms: lymphoid dendritic cell, interferon-producing dendritic cell. A dendritic cell type of distinct morphology, localization, and surface marker expression from other dendritic cell types and associated with early stage immune responses, particularly the release of physiologically abundant amounts of type I interferons in response to infection.	20	7.52044	0.699854	7.15522	6.95082	7.07959	8.20506	8.84618
motor cortex layer 5 pyramidal neuron > motor cortex pyramidal neuron > motor cortex neuron > frontal lobe neuron (unspecified) > frontal lobe neuron > cerebral cortex neuron (unspecified) > cerebral cortex neuron > telencephalon neuron (unspecified) > telencephalon neuron > forebrain neuron > brain neuron > neuron > central nervous system cell > nervous system cell > Cell type	motor cortex layer 5 pyramidal neuron		11	7.41907	0.569039	7.13566	6.77057	6.93086	7.80871	8.36203
left ventricle free wall > heart left ventricle > heart ventricle > heart muscle (myocardium, cardiac muscle) > heart > cardiovascular system > circulatory system > Tissue	left ventricle free wall		15	7.11369	0.0991765	7.1207	7.02392	7.06577	7.14608	7.18547
prostatic epithelium cell > prostate (prostate gland) cell > male reproductive system cell > reproductive system cell > Cell type	prostatic epithelium cell		6	7.13476	0.15313	7.11941	6.92374	7.06803	7.1914	7.1914
stria vascularis > cochlear duct > cochlea > osseous labyrinth > inner ear > ear > sensory organ system > Tissue	stria vascularis		6	7.1078	0.112604	7.10675	7.00068	7.00146	7.12236	7.12236
cerebellar granule cell precursor > granule cell precursor > neural precursor cell > central nervous system cell > nervous system cell > Cell type	cerebellar granule cell precursor		4	7.11317	0.107317	7.08884	7.01067	7.08725	7.26435	7.26435
prefrontal cortex > frontal lobe > cerebral cortex lobe / region > cerebral cortex (neopallium) > cerebral hemisphere > telencephalon (cerebrum) > forebrain (prosencephalon) > brain (encephalon) > central nervous system (CNS) > nervous system > Tissue	prefrontal cortex		67	7.09639	0.364814	7.08034	6.61648	6.94462	7.17413	7.42249
ureter > urinary system > Tissue	ureter		4	7.06389	0.720184	7.06262	6.19417	6.92351	7.93617	7.93617
skeletal muscle > musculoskeletal system > Tissue	skeletal muscle		20	7.24203	0.469619	7.02515	6.73403	6.84775	7.6453	8.20892
jejunum > small intestine > intestine > gastrointestinal tract > alimentary system > Tissue	jejunum		6	6.99436	0.16944	6.90838	6.86357	6.86987	7.15906	7.25692
brown adipose tissue (brown fat,BAT) > adipose tissue (fat) > connective tissue > Tissue	brown adipose tissue (brown fat,BAT)		23	7.10054	0.395699	6.86233	6.51791	6.75074	7.41177	7.89524
renal proximal convoluted tubule > renal tubule > nephron > kidney > urinary system > Tissue	renal proximal convoluted tubule		6	6.85431	0.122964	6.82289	6.73917	6.76208	6.92398	7.05485
tongue > mouth (oral cavity) > gastrointestinal tract > alimentary system > Tissue	tongue		24	6.65462	0.156562	6.64202	6.34837	6.53993	6.73281	6.99977

## Sheet: C7orf25 Human RNA-seq
(log2 scale)			Gene Symbol	C7orf25	C7orf25	C7orf25	C7orf25	C7orf25	C7orf25	C7orf25
			Gene	ENSG00000136197	ENSG00000136197	ENSG00000136197	ENSG00000136197	ENSG00000136197	ENSG00000136197	ENSG00000136197
			Measure	ENSG00000136197	ENSG00000136197	ENSG00000136197	ENSG00000136197	ENSG00000136197	ENSG00000136197	ENSG00000136197
Path to root	Anatomy	Description	# samples	Mean value	Standard Error	Median Value	Lower Whisker	Lower Quartile	Upper Quartile	Upper Whisker
blood low density basophil granulocyte > blood basophil granulocyte > basophil granulocyte > granulocyte (polymorphonuclear leukocyte) > myeloid leukocyte > leukocyte > hematopoietic and immune system cell > Cell type	blood low density basophil granulocyte		4	4.13858	0.331674	4.42367	4.36374	4.36374	4.55627	4.55627
large airway basal cell > large airway epithelium cell > large airway mucosa cell > large airway cell > bronchoalveolar system cell > lung cell > respiratory system cell > Cell type	large airway basal cell		41	3.73501	0.0511921	3.86803	3.00744	3.48592	3.98764	4.17914
bronchiolar basal cell > bronchiolar (small airway) epithelium cell > bronchiolar (small airway) mucosa cell > bronchiolar (small airway) cell > bronchoalveolar system cell > lung cell > respiratory system cell > Cell type	bronchiolar basal cell	----	3	3.7933	0.142586	3.82572	3.53173	3.53173	4.02246	4.02246
cervical spinal ganglion (dorsal root ganglion) > spinal ganglion (dorsal root ganglion) > peripheral nervous system (PNS) > nervous system > Tissue	cervical spinal ganglion (dorsal root ganglion)		3	3.63834	0.053491	3.67432	3.5331	3.5331	3.70761	3.70761
lumbar spinal ganglion (dorsal root ganglion) > spinal ganglion (dorsal root ganglion) > peripheral nervous system (PNS) > nervous system > Tissue	lumbar spinal ganglion (dorsal root ganglion)		3	3.27454	0.181963	3.40737	2.9147	2.9147	3.50155	3.50155
bronchiolar (small airway) epithelium cell > bronchiolar (small airway) mucosa cell > bronchiolar (small airway) cell > bronchoalveolar system cell > lung cell > respiratory system cell > Cell type	bronchiolar (small airway) epithelium cell	----	22	3.25589	0.036089	3.26624	2.8085	3.15885	3.39386	3.4801
Brodmann area 46 > dorsolateral prefrontal cortex > prefrontal cortex > frontal lobe > cerebral cortex lobe / region > cerebral cortex (neopallium) > cerebral hemisphere > telencephalon (cerebrum) > forebrain (prosencephalon) > brain (encephalon) > central nervous system (CNS) > nervous system > Tissue	Brodmann area 46		27	2.92407	0.137597	3.15082	1.40725	2.36657	3.4399	3.73981
bronchoalveolar system cell > lung cell > respiratory system cell > Cell type	bronchoalveolar system cell	----	23	3.13625	0.0752174	3.10677	2.48005	2.92585	3.35005	3.8392
hippocampus astrocyte > temporal lobe astrocyte > cerebral cortex astrocyte > telencephalon astrocyte > forebrain astrocyte > brain astrocyte (unspecified) > astrocyte (unspecified) > astrocyte > glia cell > central nervous system cell > nervous system cell > Cell type	hippocampus astrocyte		4	2.94623	0.153007	3.01296	2.53234	2.90788	3.22666	3.22666
coronary artery smooth muscle cell > artery smooth muscle cell > vascular smooth muscle cell > blood vessel cell > vascular system cell > cardiovascular system cell > circulatory system cell > Cell type	coronary artery smooth muscle cell		6	3.06239	0.0951945	3.01256	2.78246	2.90335	3.23698	3.42645
colonic CD4 regulatory T-cell (unspecified) > CD4 regulatory T-cell (unspecified) > CD4 regulatory T-cell > CD4 T-cell > T-cell > T-cell lineage > lymphocyte > lymphoid leukocyte > leukocyte > hematopoietic and immune system cell > Cell type	colonic CD4 regulatory T-cell (unspecified)		7	2.48543	0.258931	2.79952	1.43426	1.79973	2.98006	3.265
tumor derived Th17 T-cell > Th17 T-cell > CD4 helper T-cell > CD4 T-cell > T-cell > T-cell lineage > lymphocyte > lymphoid leukocyte > leukocyte > hematopoietic and immune system cell > Cell type	tumor derived Th17 T-cell		11	2.45843	0.238995	2.75	0.733011	1.90688	3.01569	3.33818
dermal fibroblast > dermis cell > skin cell > integumentary system cell > Cell type	dermal fibroblast		1	2.74174	NaN	2.74174	2.74174	2.74174	2.74174	2.74174
tumor derived Th1 T-cell > Th1 T-cell > CD4 helper T-cell > CD4 T-cell > T-cell > T-cell lineage > lymphocyte > lymphoid leukocyte > leukocyte > hematopoietic and immune system cell > Cell type	tumor derived Th1 T-cell		13	2.71914	0.137261	2.70961	2.19187	2.6443	3.02705	3.11625
granulocyte (polymorphonuclear leukocyte) > myeloid leukocyte > leukocyte > hematopoietic and immune system cell > Cell type	granulocyte (polymorphonuclear leukocyte)		1	2.6935	NaN	2.6935	2.6935	2.6935	2.6935	2.6935
[truncated: 355 more rows]

## Sheet: C7orf25 Human Microarray
(log2 scale)			Gene Symbol	C7orf25	C7orf25	C7orf25	C7orf25	C7orf25	C7orf25	C7orf25
			Gene	ENSG00000136197	ENSG00000136197	ENSG00000136197	ENSG00000136197	ENSG00000136197	ENSG00000136197	ENSG00000136197
[truncated: 450 more rows]

## Sheet: C7orf25 Mouse RNA-seq
(log2 scale)			Gene Symbol	AW209491	AW209491	AW209491	AW209491	AW209491	AW209491	AW209491
[truncated: 337 more rows]

[truncated: 19 more sheets: C7orf25 Mouse Microarray, Cxorf58 Human RNA-seq, Cxorf58 Human Microarray, RSRP1 Human RNA-seq, RSRP1 Human Microarray, RSRP1 Mouse RNA-seq, RSRP1 Mouse Microarray, SMLR1 Human RNA-seq, SMLR1 Human Microarray, SMLR1 Mouse RNA-seq, SMLR1 Mouse Microarray, TMEM53 Human RNA-seq, TMEM53 Human Microarray, TMEM53 Mouse RNA-seq, TMEM53 Mouse Microarrays, TMEM232 Human RNA-seq, TMEM232 Human Microarray, TMEM232 Mouse RNA-seq, TMEM232 Mouse Microarray]
