# Supplementary material for: Functionathon: a manual data mining workflow to generate functional hypotheses for uncharacterized human proteins and its application by undergraduate students
Source: Database (Oxford). 2021 Jul 28;2021:baab046. doi: 10.1093/database/baab046 (PMC8317215; doi:10.1093/database/baab046)
Supplement: baab046_Supp [file baab046_supp.zip › Table S4.xlsx]

## Sheet: Table 1
C6orf118 (scores: 0.98-0.91)	C6orf118 mapping gene list	Swiss-Prot AC	C7orf25 (scores: 0.70-0.56)	C7orf25 mapping gene list	Swiss-Prot AC	CXorf58 (scores: 0.92-0.81)	CXorf58 mapping gene list	Swiss-Prot AC	RSRP1 (scores: 0.76-0.59)	RSRP1 mapping gene list	Swiss-Prot AC	SMLR1 (scores: 0.97-0.82)	SMLR1 mapping gene list	Swiss-Prot AC	TMEM53 (scores: 0.74-0.52)	TMEM53 mapping gene list	Swiss-Prot AC	TMEM232 (scores: 0.97-0.91)	TMEM232 mapping gene list	Swiss-Prot AC
CCDC37,CFAP100	CCDC37,CFAP100	Q494V2	CDC26	CDC26	Q8NHZ8	AKAP11	AKAP11	Q9UKA4	BTN2A1	BTN2A1	Q7KYR7	NAT2	NAT2	P11245	DTX4	DTX4	Q9Y2E6	CASC1	CASC1	Q6TDU7
C11orf97	C11orf97	A0A1B0GVM6	RP11-305M3.2,AC009244.1	COPB2	P35606	LRRIQ3	LRRIQ3	A6PVS8	PAN3	PAN3	Q58A45	SLC2A2	SLC2A2	P11168	RMDN2	RMDN2	Q96LZ7	SPEF2	SPEF2	Q9C093
CCDC65	CCDC65	Q8IXS2	AC098614.2	C14orf119	Q9NWQ9	C2orf73	C2orf73	Q8N5S3	VCPKMT	VCPKMT	Q9H867	LEAP2	LEAP2	Q969E1	SLC22A18	SLC22A18	Q96BI1	MAP3K19	MAP3K19	Q56UN5
RP11-872J21.3	CCDC39	Q9UFE4	COPB2	POMP	Q9Y244	CCDC181	CCDC181	Q5TID7	PGS1	PGS1	Q32NB8	PLA2G12B	PLA2G12B	Q9BX93	FMO5	FMO5	P49326	C5orf49	C5orf49	A4QMS7
CCDC39	C15orf26,CFAP161	Q6P656	C14orf119	KIAA1429,VIRMA	Q69YN4	DYDC1	DYDC1	Q8WWB3	RBM5	RBM5	P52756	CYP2C9	CYP2C9	P11712	MLPH	MLPH	Q9BV36	ARMC2	ARMC2	Q8NEN0
C15orf26,CFAP161	MAP3K19	Q56UN5	POMP	CD2BP2	O95400	CHKA	CHKA	P35790	KIAA1551,RESF1	KIAA1551,RESF1	Q9HCM1	NR1H4	NR1H4	Q96RI1	FAM160B2	FAM160B2	Q86V87	CCDC65	CCDC65	Q8IXS2
MAP3K19	CCDC78	A2IDD5	KIAA1429,VIRMA	SEC13	P55735	ARL13B	ARL13B	Q3SXY8	WSB1	WSB1	Q9Y6I7	FABP1	FABP1	P07148	SLC35C1	SLC35C1	Q96A29	CFAP47	CFAP47	Q6ZTR5
CCDC78	DTHD1	Q6ZMT9	CD2BP2	TRMT112	Q9UI30	NUP62CL	NUP62CL	Q9H1M0	RASA2	RASA2	Q15283	A1CF	A1CF	Q9NQ94	LDAH	LDAH	Q9H6V9	MIR34C	TTC29	Q8NA56
DTHD1	SAXO2	Q658L1	SEC13	MED20	Q9H944	ARMC9	ARMC9	Q7Z3E5	ZNF266	ZNF266	Q14584	GOLT1A	GOLT1A	Q6ZVE7	ENTPD5	ENTPD5	O75356	MIR34B	C6orf165,CFAP206	Q8IYR0
SAXO2	C11orf88	Q6PI97	TRMT112	TPM1	P09493	STK33	STK33	Q9BYT3	NBPF15	NBPF15	Q8N660	TM4SF5	TM4SF5	O14894	ENPP3	ENPP3	O14638	TTC29	WDR78	Q5VTH9
C11orf88	KCNRG	Q8N5I3	MED20	LBHD1	Q9BQE6	DAW1	DAW1	Q8N136	NBPF8	NBPF8	Q3BBV2	RNU1-70P	APOC3	P02656	CYP3A7	CYP3A7	P24462	C6orf165,CFAP206	TSGA10	Q9BZW7
KCNRG	FHAD1	B1AJZ9	TPM1	C11orf98	E9PRG8	SPATS1	SPATS1	Q496A3	FAM76B	FAM76B	Q5HYJ3	APOC3	METTL7B	Q6UX53	ACTR3C	ACTR3C	Q9C0K3	WDR78	CFAP43	Q8NDM7
FHAD1	CCDC153	Q494R4	LBHD1	ENY2	Q9NPA8	RP11-444E17.6,AL353588.1	CCNA1	P78396	PWWP2A	PWWP2A	Q96N64	METTL7B	ABCG8	Q9H221	SLC35D1	SLC35D1	Q9NTN3	TSGA10	ADGB	Q8N7X0
CCDC153	ADGB	Q8N7X0	C11orf98	CSTB	P04080	CCNA1	LCA5L	O95447	FNBP1	FNBP1	Q96RU3	ABCG8	CCL15	Q16663	MIR1229	CCL15	Q16663	CFAP43	FHAD1	B1AJZ9
ADGB	CCDC114	Q96M63	ENY2	HAX1	O00165	LCA5L	LRTOMT	Q8WZ04	SMCHD1	SMCHD1	A6NHR9	CCL15	INHBC	P55103	CCL15	KIF13B	Q9NQT8	ADGB	C15orf26,CFAP161	Q6P656
CCDC114	C5orf49	A4QMS7	RP5-1039K5.19	DPH3	Q96FX2	LRTOMT	LRTOMT	Q96E66	ITSN2	ITSN2	Q9NZM3	INHBC	CYP3A43	Q9HB55	KIF13B	DNAJC22	Q8N4W6	FHAD1	VWA3B	Q502W6
C5orf49	C3orf67	Q6ZVT6	CTD-2639E6.9	FAM114A2	Q9NRY5	IQUB	IQUB	Q8NA54	IKBKB	IKBKB	O14920	CYP3A43	APOB	P04114	DNAJC22	SLC38A10	Q9HBR0	C15orf26,CFAP161	ARMC4	Q5T2S8
MIR34C	EFHB	Q8N7U6	CSTB	RNF14	Q9UBS8	TPTE2P6	ST6GALNAC1	Q9NSC7	CREB1	CREB1	P16220	APOB	CYP3A4	P08684	SLC38A10	OCEL1	Q9H607	VWA3B	SAXO2	Q658L1
MIR34B	STOML3	Q8TAV4	RNF103-CHMP3	SNRNP35	Q16560	RP11-556N21.1	LRRC71	Q8N4P6	SMCR8	SMCR8	Q8TEV9	ABCC6P1	CYP3A7	P24462	OCEL1	MOGAT2	Q3SYC2	ARMC4	HYDIN	Q4G0P3
FLJ26850	CCL15	Q16663	HAX1	SH3GLB1	Q9Y371	ST6GALNAC1	NPHP1	O15259	DDX17	DDX17	Q92841	CYP3A4	NPC1L1	Q9UHC9	MOGAT2	CYB561D2	O14569	SAXO2	C7orf57	Q8NEG2
C3orf67	IQCH	Q86VS3	RP4-592A1.2,AL035411.1	CNBP	P62633	LRRC71	SELM,SELENOM	Q8WWX9	IST1	IST1	P53990	CYP3A7	PRAP1	Q96NZ9	CYB561D2	SCARB1	Q8WTV0	HYDIN	TEKT2	Q9UIF3
EFHB	DNAH7	Q8WXX0	DPH3	C4orf3	Q8WVX3	NPHP1	ENPP5	Q9UJA9	ZNF700	ZNF700	Q9H0M5	NPC1L1	MTTP	P55157	SCARB1	SHROOM3	Q8TF72	C7orf57	NEK5	Q6P3R8
STOML3	TEKT2	Q9UIF3	FTH1P20	FTL	P02792	SELM,SELENOM	C9orf116	Q5BN46	CTD-2006C1.13,AC008770.2	WAC	Q9BTA9	PRAP1	ANKS4B	Q8N8V4	SHROOM3	ILVBL	A1L0T0	TEKT2	AK7	Q96M32
CCL15	ZNF474	Q6S9Z5	FTH1P16	LEO1	Q8WVC0	ENPP5	BBS12	Q6ZW61	WAC	SF3B1	O75533	MTTP	MIA2	Q96PC5	ILVBL	CLDN7	O95471	NEK5	ZNF474	Q6S9Z5
IQCH	SPEF2	Q9C093	FTH1P2	HSBP1	O75506	MIR34C	CFAP58	Q5T655	SF3B1	RICTOR	Q6R327	ANKS4B	MOGAT2	Q3SYC2	CLDN7	AGPAT2	O15120	AK7	EFHB	Q8N7U6
DNAH7	ZMYND10	O75800	FTH1P11	PSME3	P61289	MIR34B	FER1L5	A0AVI2	RICTOR	SMG1	Q96Q15	MIA2	SHBG	P04278	AGPAT2	MTG1	Q9BT17	ZNF474	C4orf22,CFAP299	Q6V702
TEKT2	TTC26	A0AVF1	FAM114A2	RAE1	P78406	AC002456.2,AC006153.3	CCDC173	Q0VFZ6	SMG1	OGT	O15294	MOGAT2	MPST	P25325	MTG1	ABCG2	Q9UNQ0	EFHB	CFAP53	Q96M91
ZNF474	MAK	P20794	RNF14	GMPPA	Q96IJ6	C9orf116	ROPN1L	Q96C74	RP6-218J18.2,AL034370.1	BANP	Q8N9N5	SHBG	APOC2	P02655	ABCG2	KIAA1522	Q9P206	C4orf22,CFAP299	LRRC34	Q8IZ02
SPEF2	IQCD	Q96DY2	SNRNP35	TAF12	Q16514	BBS12	XPR1	Q9UBH6	CTD-2371O3.3	HMGB2	P26583	MPST	NR0B2	Q15466	KIAA1522	FOXA3	P55318	CFAP53	PIH1D3	Q9NQM4
ZMYND10	WDR63	Q8IWG1	SH3GLB1	YIPF3	Q9GZM5	CFAP58	NME5	P56597	OGT	CCNT2	O60583	APOC4-APOC2	SLC30A10	Q6XR72	FOXA3	HDHD3	Q9BSH5	LRRC34	DNAH12	Q6ZR08
TTC26	ERN2	Q76MJ5	CNBP	IK	Q13123	FER1L5	ANKRD45	Q5TZF3	BANP	USP34	Q70CQ2	APOC2	SULT2A1	Q06520	HDHD3	SLC2A9	Q9NRM0	PIH1D3	MORN5	Q5VZ52
MAK	CFAP126	Q5VTH2	AC079780.3,AC079780.1	KHDRBS1	Q07666	CCDC173	SMKR1	H3BMG3	RP11-488L18.10	CLK4	Q9HAZ1	NR0B2	CTH	P32929	SLC2A9	HSD17B2	P37059	DNAH12	CFAP126	Q5VTH2
IQCD	CFAP43	Q8NDM7	C4orf3	RAB9A	P51151	ROPN1L	TCTE1	Q5JU00	HMGB2	PSPC1	Q8WXF1	SLC30A10	TRIM15	Q9C019	HSD17B2	ZBED6CL	Q96FA7	MORN5	FAM81B	Q96LP2
WDR63	TTC25	Q96NG3	FTL	PIPSL	A2A3N6	XPR1	GLIS3	Q8NEA6	CCNT2	AKAP17A	Q02040	SULT2A1	SLC35D1	Q9NTN3	ZBED6CL	BCL2L14	Q9BZR8	SRGAP3-AS2	DNAH7	Q8WXX0
ERN2	CFAP54	Q96N23	FTLP3	UBE2L5	A0A1B0GUS4	NME5	CFAP53	Q96M91	USP34	KIAA0430,MARF1	Q9Y4F3	RP11-255C15.3	GLTPD2	A6NH11	BCL2L14	USP40	Q9NVE5	CFAP126	STOML3	Q8TAV4
LINC00326	CFAP58	Q5T655	LEO1	SKP1	P63208	RP11-318A15.2	CHST9	Q7L1S5	CLK4	SLTM	Q9NWH9	CTH	ABCC2	Q92887	USP40	FUCA1	P04066	FAM81B	WDR63	Q8IWG1
CFAP126	DNAH9	Q9NYC9	HSBP1	S100A11	P31949	ANKRD45	MORN5	Q5VZ52	PSPC1	PHC3	Q8NDX5	TRIM15	DNAJC22	Q8N4W6	FUCA1	TRIM14	Q14142	FLJ26850	C11orf88	Q6PI97
CFAP43	AKAP14	Q86UN6	PSME3	MRPL36	Q9P0J6	SMKR1	C22orf23	Q9BZE7	AKAP17A	NPAT	Q14207	CYP3A7-CYP3A51P	RDH5	Q92781	TRIM14	KIF3B	O15066	DNAH7	SPATS1	Q496A3
RP11-308D16.2,AL390879.1	NEK5	Q6P3R8	RAE1	CHTOP	Q9Y3Y2	TCTE1	LRRC34	Q8IZ02	KIAA0430,MARF1	ERICH1	Q86X53	SLC35D1	SLC27A2	O14975	KIF3B	NAT1	P18440	STOML3	DNAI2	Q9GZS0
TTC25	WDR38	Q5JTN6	GMPPA	XRCC4	Q13426	GLIS3	C6orf165,CFAP206	Q8IYR0	THAP9-AS1	DMTF1	Q9Y222	GLTPD2	BAAT	Q14032	NAT1	INTS14	Q96SY0	WDR63	C11orf97	A0A1B0GVM6
CFAP54	RSPH4A	Q5TD94	TAF12	UFD1L,UFD1	Q92890	CFAP53	BTG4	Q9NY30	SLTM	ANKRD49	Q8WVL7	ABCC2	GJB1	P08034	INTS14	XDH	P47989	RP11-872J21.3	C1orf110,CCDC190	Q86UF4
CFAP58	TEKT1	Q969V4	YIPF3	MMADHC	Q9H3L0	CHST9	TTC26	A0AVF1	PHC3	ARID4B	Q4LE39	DNAJC22	SLC19A3	Q9BZV2	XDH	DHRS4-AS1	Q9P1J3	C11orf88	ZBBX	A8MT70
DNAH9	C7orf57	Q8NEG2	IK	NRBP1	Q9UHY1	MORN5	ZNF608	Q9ULD9	NPAT	MAU2	Q9Y6X3	RDH5	ADH6	P28332	DHRS4-AS1	PDIA5	Q14554	SPATS1	AKAP14	Q86UN6
AKAP14	ARMC4	Q5T2S8	YBX1P10	AP3M1	Q9Y2T2	C22orf23	FSIP1	Q8NA03	INTS6-AS1	GPCPD1	Q9NPB8	AP006216.5	ASPG	Q86U10	PDIA5	CYP3A5	P20815	RP11-444E17.6,AL353588.1	CCDC39	Q9UFE4
NEK5	RSPH9	Q9H1X1	ISY1-RAB43	SAP18	O00422	LRRC34	DNAL1	Q4LDG9	ERICH1	ZNF131	P52739	RP4-798P15.3	ABCG5	Q9H222	CYP3A5	TNS3	Q68CZ2	DNAI2	PIFO	Q8TCI5
WDR38	CAPS	Q13938	KHDRBS1	NRBF2	Q96F24	CTD-2366F13.1	WDR54	Q9H977	DMTF1	PAXBP1	Q9Y5B6	SLC27A2	REEP6	Q96HR9	TNS3	HKDC1	Q2TB90	C11orf97	ARMC3	Q5W041
RSPH4A	C1orf158	Q8N1D5	RAB9A	FADD	Q13158	C6orf165,CFAP206	PCDHA8	Q9Y5H6	ANKRD49	SENP7	Q9BQF6	BAAT	HNF1A	P20823	HKDC1	DOLPP1	Q86YN1	C1orf110,CCDC190	FAM216B	Q8N7L0
TEKT1	GP6	Q9HCN6	PIPSL	CLIC1	O00299	BTG4	PCDHA7	Q9UN72	ARID4B	CHD2	O14647	GJB1	WFDC9	Q8NEX5	DOLPP1	FMO4	P31512	ZBBX	CFAP58	Q5T655
C7orf57	C4orf22,CFAP299	Q6V702	UBE2L5P,UBE2L5	KHNYN	O15037	TTC26	PCDHA1	Q9Y5I3	MAU2	NFATC2IP	Q8NCF5	SLC19A3	TDO2	P48775	FMO4	HFE	Q30201	AKAP14	TEX26	Q8N6G2
ARMC4	CFAP45	Q9UL16	AL158801.1,AL158801.5	DCAF10	Q5QP82	ZNF608	PCDHA13	Q9Y5I0	GPCPD1	CLK2	P49760	ADH6	CRADD	P78560	HFE	HNF4G	Q14541	CCDC39	ROPN1L	Q96C74
RSPH9	FAM216B	Q8N7L0	SKP1	RARS2	Q5T160	RP4-547N15.3	PCDHA11	Q9Y5I1	ZNF131	ENTPD4	Q9Y227	RP11-49I11.4	AGPAT2	O15120	HNF4G	KIF16B	Q96L93	PIFO	DNAH10	Q8IVF4
CAPS	PLEKHS1	Q5SXH7	S100A11	LZIC	Q8WZA0	FSIP1	PCDHA12	Q9UN75	PAXBP1	KDM3A	Q9Y4C1	ASPG	CYP2C19	P33261	KIF16B	TRIM15	Q9C019	ARMC3	AGBL2	Q5U5Z8
C1orf158	CDHR3	Q6ZTQ4	MRPL36	VTA1	Q9NP79	DNAL1	RPGRIP1L	Q68CZ1	SENP7	CREBBP	Q92793	ABCG5	SLC28A1	O00337	LINC00261	CYP3A4	P08684	FAM216B	DAW1	Q8N136
GP6	DIO1	P49895	CHTOP	ST13P4	Q8IZP2	WDR54	TP53BP1	Q12888	CHD2	ZCCHC8	Q6NZY4	REEP6	SLC17A9	Q9BYT1	TRIM15	TMEM37	Q8WXS4	CFAP58	DNAH9	Q9NYC9
RP11-128M1.1	CCDC40	Q4G0X9	XRCC4	SNX12	Q9UMY4	LINC01607	CLGN	O14967	NFATC2IP	SRSF11	Q05519	RP5-1097F14.3,AL109810.2	HPX	P02790	CYP3A4	PLS1	Q14651	TEX26	SPAG6	O75602
C4orf22,CFAP299	WDR66	Q8TBY9	UFD1L,UFD1	SHFM1,SEM1	P60896	PCDHA8	TTC29	Q8NA56	CLK2	RPL17	P18621	HNF1A	NEU4	Q8WWR8	TMEM37	CLMN	Q96JQ2	ROPN1L	TEKT1	Q969V4
CFAP45	SMIM31	A0A1B0GVY4	MMADHC	SEM1	Q6ZVN7	PCDHA7	NPTN	Q9Y639	ENTPD4	SYNRG	Q9UMZ2	WFDC9	C8G	P07360	PLS1	TMPRSS2	O15393	DNAH10	CAPSL	Q8WWF8
FAM216B	PIR	O00625	NRBP1	GABARAPL2	P60520	PCDHA1	RSPH9	Q9H1X1	KDM3A	C2CD5	Q86YS7	AC005355.2	ALDOB	P05062	CLMN	TNFRSF21	O75509	AGBL2	CFAP52	Q8N1V2
PLEKHS1	C6orf165,CFAP206	Q8IYR0	AP3M1	ZNF622	Q969S3	PCDHA13	TEX26	Q8N6G2	CREBBP	HAUS3	Q68CZ6	TDO2	ISOC1	Q96CN7	TMPRSS2	ARSD	P51689	DAW1	ANKRD45	Q5TZF3
RP11-290F5.2	MORN5	Q5VZ52	SAP18	ASCC2	Q9H1I8	PCDHA11	C11orf97	A0A1B0GVM6	RNA5SP244	ACAP2	Q15057	CRADD	THPO	P40225	TNFRSF21	ENTPD7	Q9NQZ7	DNAH9	EFCAB12	Q6NXP0
CDHR3	EFCAB12	Q6NXP0	NRBF2	TFIP11	Q9UBB9	PCDHA12	TSGA10	Q9BZW7	ZCCHC8	LNPEP	Q9UIQ6	AGPAT2	APOA5	Q6Q788	ARSD	PIGV	Q9NUD9	SPAG6	OMG	P23515
DIO1	TMEM232	C9JQI7	FADD	HAT1	O14929	RPGRIP1L	LCA5	Q86VQ0	SRSF11	SCAF11	Q99590	GOT2P1	CA5A	P35218	ENTPD7	NAT2	P11245	TEKT1	IQUB	Q8NA54
CCDC40	TEX9	Q8N6V9	CLIC1	PSMD1	Q99460	TP53BP1	C14orf142,GON7	Q9BXV9	AFG3L1P	DCP2	Q8IU60	CYP2C19	SLC51A	Q86UW1	PIGV	KRT8	P05787	CAPSL	BPIFA1	Q9NP55
WDR66	CFAP47	Q6ZTR5	KHNYN	PSMD4	P55036	CLGN	CFAP221	Q4G0U5	FAM13A-AS1	PNISR	Q8TF01	RP11-400G3.5,AL583836.1	GNRHR	P30968	CYP3A7	PIGR	P01833	CFAP52	SNTN	A6NMZ2
VWA8-AS1	CFAP52	Q8N1V2	DCAF10	TFDP1	Q14186	TTC29	TMEM135	Q86UB9	CTB-31O20.2	LYST	Q99698	SLC28A1	SLC25A15	Q9Y619	NAT2	TCTA	P57738	ANKRD45	DTHD1	Q6ZMT9
LINC01207,SMIM31	TUBA4B	Q9H853	RARS2	NSMCE2	Q96MF7	NPTN	ALDH1A1	P00352	SNORD58C	HERPUD2	Q9BSE4	SLC17A9	RAB17	Q9H0T7	AC092066.1	FICD	Q9BVA6	EFCAB12	C6orf118	Q5T5N4
PIR	WDR78	Q5VTH9	LZIC	PRMT2	P55345	RSPH9	DHRS4-AS1	Q9P1J3	RPL17	ZNF230	Q9UIE0	HPX	CYP2C18	P33260	KRT8	CNDP2	Q96KP4	OMG	C1orf158	Q8N1D5
C6orf165,CFAP206	LRGUK	Q96M69	VTA1	MRPL51	Q4U2R6	TEX26	EFCAB6	Q5THR3	SYNRG	TRIM33	Q9UPN9	LINC00525	KRT222	Q8N1A0	KRT8P3	DAP	P51397	IQUB	CCDC173	Q0VFZ6
MORN5	DNAH2	Q9P225	ST13P13	C2orf76	Q3KRA6	C11orf97	SPATA4	Q8NEY3	C2CD5	MORC3	Q14149	CTD-2256P15.2	C8B	P07358	PIGR	KCTD5	Q9NXV2	BPIFA1	C9orf116	Q5BN46
EFCAB12	PIH1D3	Q9NQM4	ST13P4	SNF8	Q96H20	TSGA10	GDPD1	Q8N9F7	HAUS3	FAM13B	Q9NYF5	NEU4	CPN2	P22792	TCTA	SEMA4G	Q9NTN9	SNTN	COLCA1	Q6ZS62
TMEM232	TTC29	Q8NA56	ST13P18	ZMAT2	Q96NC0	DLG1-AS1	NEK10	Q6ZWH5	ACAP2	DDX26B,INTS6L	Q5JSJ4	C8G	FMO5	P49326	FICD	KRT18	P05783	DTHD1	DNAH2	Q9P225
TEX9	ANKUB1	A6NFN9	SNX12	PSMB7	Q99436	LCA5	PIH1D2	Q8WWB5	LNPEP	APAF1	O14727	ALDOB	MST1	P26927	CNDP2	PIGU	Q9H490	C6orf118	RSPH4A	Q5TD94
CFAP47	SLC44A4	Q53GD3	SHFM1,SEM1	RTFDC1,RTF2	Q9BY42	C14orf142,GON7	GSTA1	P08263	SCAF11	TAF1C	Q15572	AC012507.3	SGK2	Q9HBY8	DAP	EHHADH	Q08426	C1orf158	ZMYND10	O75800
CFAP52	CASC1	Q6TDU7	GABARAPL2	RPL36AL	Q969Q0	LINC00326	TMEM131	Q92545	ROCK1P1	RBM22	Q9NW64	AP006285.6	CPN1	P15169	NUDT16P1	SLC46A3	Q7Z3Q1	CCDC173	PLEKHS1	Q5SXH7
TUBA4B	CCDC17	Q96LX7	NPM1P39	IGF2BP3	O00425	CFAP221	ZBBX	A8MT70	DCP2	KDM5A	P29375	AP006285.7	COX6A1	P12074	KCTD5	IVD	P26440	C9orf116	C10orf107,CABCOCO1	Q8IVU9
WDR78	SNTN	A6NMZ2	NPM1P27	UBL5	Q9BZL1	TMEM135	DYRK3	O43781	PNISR	DBF4	Q9UBU7	ISOC1	OR51B2	Q9Y5P1	SEMA4G	RRBP1	Q9P2E9	COLCA1	FOXA1	P55317
LRGUK	OMG	P23515	RP1-37E16.12,Z83844.1	TOX4	O94842	ALDH1A1	WDR63	Q8IWG1	LYST	ATM	Q13315	THPO	POR	P16435	KRT18	GDF15	Q99988	DNAH2	WDR38	Q5JTN6
DNAH2	LRRIQ1	Q96JM4	ZNF622	CDK4	P11802	DHRS4-AS1	CASC2	Q6XLA1	HERPUD2	CEP350	Q5VT06	RP11-180M15.6	CYP3A5	P20815	AC107016.1	CARKD	Q8IW45	RSPH4A	DYNLRB2	Q8TF09
PIH1D3	ROPN1L	Q96C74	ASCC2	HSPA8	P11142	EFCAB6	CASC2	Q8IU53	ZNF230	BTAF1	O14981	TUBB4BP7	TM4SF4	P48230	PIGU	INPP5E	Q9NRR6	ZMYND10	RSPH1	Q8WYR4
TTC29	DNAI2	Q9GZS0	TFIP11	NELFE	P18615	SPATA4	C6orf52	Q5T4I8	TRIM33	SF3A1	Q15459	APOA5			EHHADH	SLC35A1	P78382	PLEKHS1	LRRIQ3	A6PVS8
SRGAP3-AS2	CCDC173	Q0VFZ6	HAT1	IGBP1	P78318	GDPD1	DNAAF2	Q9NVR5	CARD8-AS1	PRRC2C	Q9Y520	CA5A			SLC46A3	C6orf165	Q8IYR0	C10orf107,CABCOCO1	DNAH6	Q9C0G6
ANKUB1	C10orf107,CABCOCO1	Q8IVU9	PSMD1	ANAPC11	Q9NYG5	NEK10	EPDR1	Q9UM22	MORC3	ADAR	P55265	CTB-31N19.2,AC005632.1			IVD	MGAT4A	Q9UM21	FOXA1	ABCA13	Q86UQ4
SLC44A4	GRIN3B	O60391	PSMD4	EXOSC3	Q9NQT5	PIH1D2	ZNF627	Q7L945	FAM13B	MDM1	Q8TC05	CA5AP1			RRBP1	ARSE	P51690	WDR38	RIBC1	Q8N443
CASC1	NEK10	Q6ZWH5	TFDP1	RTCA	O00442	GSTA1	CCDC60	Q8IWA6	DDX26B,INTS6L	LBR	Q14739	SLC51A			GDF15	HYOU1	Q9Y4L1	DYNLRB2	DRC7	Q8IY82
CCDC17	ARMC3	Q5W041	NSMCE2	TMEM11	P17152	TMEM131	PIGM	Q9H3S5	APAF1	STK10	O94804	GNRHR			CARKD	PHOSPHO2	Q8TCD6	RSPH1	C9orf135	Q5VTT2
SNTN	CDH26	Q8IXH8	PRMT2	TRIM56	Q9BRZ2	ZBBX	MAP3K19	Q56UN5	TAF1C	GAK	O14976	AC106876.2			INPP5E	C8B	P07358	LRRIQ3	C1orf194	Q5T5A4
OMG	LRRC6	Q86X45	MRPL51	SF3B6	Q9Y3B4	DYRK3	ARMC3	Q5W041	RBM22	USPL1	Q5W0Q7	SLC25A15			SLC35A1	ADH6	P28332	DNAH6	DNAI1	Q9UI46
LRRIQ1	ALOX15	P16050	C2orf76	ABCF2	Q9UG63	RP5-991G20.1	C4orf22,CFAP299	Q6V702	KDM5A	DYRK1A	Q13627	RAB17			C6orf165	ALG14	Q96F25	ABCA13	ADH7	P40394
ROPN1L	IQUB	Q8NA54	SNF8	EIF4E2	O60573	WDR63	SLC9C2	Q5TAH2	DBF4	USP1	O94782	CYP2C18			MGAT4A	SPR	P35270	RIBC1	CCDC37,CFAP100	Q494V2
DNAI2	ALDH3A1	P30838	ZMAT2	VPS29	Q9UBQ0	CASC2	C11orf70,CFAP300	Q9BRQ4	ATM			LINC01222			ARSE	TBC1D8B	Q0IIM8	DRC7	FBXO15	Q8NCQ5
CCDC173	TTC21A	Q8NDW8	PSMB7			C6orf52	FAM229B	Q4G0N7	CEP350			RP11-22H5.2			HYOU1	CLRN3	Q8NCR9	C9orf135	MUC4	Q99102
C10orf107,CABCOCO1			RTFDC1,RTF2			DNAAF2	MORN2	Q502X0	BTAF1			KRT222			PHOSPHO2	POR	P16435	RP11-290F5.2	NEK10	Q6ZWH5
GRIN3B			RPL36AL			EPDR1	LRRC23	Q53EV4	SF3A1			C8B			C8B	ANXA13	P27216	C1orf194	EFHC2	Q5JST6
NEK10			IGF2BP3			CTC-351M12.1	DMGDH	Q9UI17	PRRC2C			CPN2			ADH6	ACOT4	Q8N9L9	DNAI1	IQCG	Q9H095
ARMC3			UBL5			ZNF627			ADAR			RP11-756H20.1			ALG14	SPHK2	Q9NRA0	ADH7
CDH26			TOX4			RP11-385M4.1			MDM1			RP11-223I10.1			SPR	ACVR1B	P36896	CCDC37,CFAP100
LRRC6			CDK4			CCDC60			LBR			FMO5			TBC1D8B	KCTD14	Q9BQ13	FBXO15
ALOX15			HSPA8			PIGM			STK10			MST1			CLRN3	DHRS11	Q6UWP2	MUC4
IQUB			SNORD14E			MAP3K19			GAK			AC099668.5			POR	THEM6	Q8WUY1	NEK10
ALDH3A1			NELFE			ARMC3			USPL1			SGK2			ANXA13			EFHC2
TTC21A			IGBP1			C4orf22,CFAP299			DYRK1A			CPN1			ACOT4			IQCG
			ANAPC11			LINC00662			RP11-271C24.3,AC108693.1			COX6A1			SPHK2			VWA8-AS1
			EXOSC3			SLC9C2			USP1			COX6A1P2			ACVR1B
			RTCA			C11orf70,CFAP300						OR51B2			KCTD14
			TMEM11			FAM229B						OR51B2			DHRS11
			TRIM56			MORN2						POR			THEM6
			RP4-581F12.1,AL031313.1			LRRC23						CYP3A5
			SF3B6			DMGDH						TM4SF4
			ABCF2
			EIF4E2
			VPS29

## Sheet: Table 2 C6orf118
C6orf118
Analysis Type:	PANTHER Overrepresentation Test (Released 20200728)
Annotation Version and Release Date:	GO Ontology database DOI: 10.5281/zenodo.3980761 Released 2020-08-10
Analyzed List:	Client Text Box Input (Homo sapiens)
Reference List:	Homo sapiens (all genes in database)
Test Type:	FISHER
Correction:	FDR
GO biological process complete	Homo sapiens - REFLIST (20851)	Client Text Box Input (93)	Client Text Box Input (expected)	Client Text Box Input (over/under)	Client Text Box Input (fold Enrichment)	Client Text Box Input (raw P-value)	Client Text Box Input (FDR)	Category
inner dynein arm assembly (GO:0036159)	16	10	0.07	+	> 100	9.07e-18	8.01e-15	cilium assembly
axonemal dynein complex assembly (GO:0070286)	36	16	0.16	+	99.65	5.35e-26	8.5e-23
epithelial cilium movement involved in determination of left/right asymmetry (GO:0060287)	12	5	0.05	+	93.42	9.19e-09	4.87e-06	cilium movement
outer dynein arm assembly (GO:0036158)	19	7	0.08	+	82.6	1.66e-11	1.15e-08	cilium assembly
axoneme assembly (GO:0035082)	73	24	0.33	+	73.71	3.71e-36	2.95e-32
regulation of cilium beat frequency (GO:0003356)	12	3	0.05	+	56.05	3.71e-05	0.00766	cilium movement
microtubule bundle formation (GO:0001578)	104	24	0.46	+	51.74	5.85e-33	3.1e-29
epithelial cilium movement involved in extracellular fluid movement (GO:0003351)	32	7	0.14	+	49.04	3.71e-10	2.45e-07
cilium movement (GO:0003341)	135	28	0.6	+	46.5	2.38e-37	3.78e-33
extracellular transport (GO:0006858)	35	7	0.16	+	44.84	6.43e-10	4.09e-07
motile cilium assembly (GO:0044458)	25	5	0.11	+	44.84	2.02e-07	7.3e-05	cilium assembly
cilium-dependent cell motility (GO:0060285)	104	20	0.46	+	43.12	4.21e-26	8.36e-23
cilium or flagellum-dependent cell motility (GO:0001539)	104	20	0.46	+	43.12	4.21e-26	7.43e-23
cilium movement involved in cell motility (GO:0060294)	92	16	0.41	+	38.99	2.16e-20	2.64e-17
sperm motility (GO:0097722)	84	12	0.37	+	32.03	1.3e-14	1.03e-11
flagellated sperm motility (GO:0030317)	84	12	0.37	+	32.03	1.3e-14	9.83e-12	cilium movement
regulation of cilium movement (GO:0003352)	39	5	0.17	+	28.74	1.47e-06	0.000448
protein localization to cilium (GO:0061512)	54	6	0.24	+	24.91	2.69e-07	9.49e-05	protein localization to cilium
regulation of microtubule-based movement (GO:0060632)	55	5	0.25	+	20.38	6.97e-06	0.00171
microtubule-based movement (GO:0007018)	342	31	1.53	+	20.32	2.77e-31	8.81e-28
cilium organization (GO:0044782)	374	32	1.67	+	19.18	1.37e-31	5.46e-28
cilium assembly (GO:0060271)	352	29	1.57	+	18.47	4.23e-28	1.12e-24
plasma membrane bounded cell projection assembly (GO:0120031)	447	29	1.99	+	14.55	2.53e-25	3.65e-22
cell projection assembly (GO:0030031)	464	29	2.07	+	14.01	6.85e-25	9.08e-22
determination of left/right symmetry (GO:0007368)	125	7	0.56	+	12.56	2.03e-06	0.000577
determination of bilateral symmetry (GO:0009855)	131	7	0.58	+	11.98	2.73e-06	0.000763
specification of symmetry (GO:0009799)	132	7	0.59	+	11.89	2.87e-06	0.000773
microtubule-based transport (GO:0099111)	190	10	0.85	+	11.8	2.04e-08	9.84e-06
microtubule cytoskeleton organization (GO:0000226)	564	27	2.52	+	10.73	2.78e-20	3.16e-17
microtubule-based process (GO:0007017)	799	36	3.56	+	10.1	1.78e-26	4.04e-23
organelle assembly (GO:0070925)	765	30	3.41	+	8.79	3.19e-20	3.38e-17
cell projection organization (GO:0030030)	1196	35	5.33	+	6.56	9.1e-20	9.04e-17
plasma membrane bounded cell projection organization (GO:0120036)	1149	33	5.12	+	6.44	2.47e-18	2.31e-15
cytoskeleton organization (GO:0007010)	1213	27	5.41	+	4.99	2.4e-12	1.73e-09
movement of cell or subcellular component (GO:0006928)	1591	34	7.1	+	4.79	3.97e-15	3.32e-12
localization of cell (GO:0051674)	1104	22	4.92	+	4.47	2.99e-09	1.83e-06
cell motility (GO:0048870)	1104	22	4.92	+	4.47	2.99e-09	1.76e-06
cellular protein-containing complex assembly (GO:0034622)	827	16	3.69	+	4.34	8.61e-07	0.000274
locomotion (GO:0040011)	1340	22	5.98	+	3.68	9.11e-08	3.81e-05
cellular component assembly (GO:0022607)	2393	32	10.67	+	3	6.14e-09	3.37e-06
protein-containing complex assembly (GO:0065003)	1306	17	5.83	+	2.92	6.49e-05	0.0129
cellular component biogenesis (GO:0044085)	2654	32	11.84	+	2.7	7.21e-08	3.18e-05
Unclassified (UNCLASSIFIED)	2867	29	12.79	+	2.27	1.39e-05	0.00312
organelle organization (GO:0006996)	3568	36	15.91	+	2.26	1.14e-06	0.000355
cellular component organization (GO:0016043)	5695	42	25.4	+	1.65	0.000255	0.0455
biological_process (GO:0008150)	17984	64	80.21	-	0.8	1.39e-05	0.00307
regulation of cellular process (GO:0050794)	11396	28	50.83	-	0.55	2.85e-06	0.00078
biological regulation (GO:0065007)	12625	31	56.31	-	0.55	1.7e-07	6.43e-05
regulation of biological process (GO:0050789)	11953	28	53.31	-	0.53	1.46e-07	5.95e-05
cellular response to stimulus (GO:0051716)	6799	13	30.33	-	0.43	5.45e-05	0.011
positive regulation of cellular process (GO:0048522)	5680	10	25.33	-	0.39	0.000155	0.0289
organonitrogen compound metabolic process (GO:1901564)	5446	9	24.29	-	0.37	0.000123	0.0232
positive regulation of biological process (GO:0048518)	6272	10	27.97	-	0.36	1.9e-05	0.00414
response to stimulus (GO:0050896)	8531	13	38.05	-	0.34	2.92e-08	1.37e-05
organic substance metabolic process (GO:0071704)	8009	12	35.72	-	0.34	7.95e-08	3.42e-05
primary metabolic process (GO:0044238)	7575	11	33.79	-	0.33	1.85e-07	6.85e-05
cellular metabolic process (GO:0044237)	7790	11	34.75	-	0.32	6.23e-08	2.83e-05
nitrogen compound metabolic process (GO:0006807)	7092	10	31.63	-	0.32	4.17e-07	0.000141
metabolic process (GO:0008152)	8590	12	38.31	-	0.31	4.15e-09	2.36e-06
protein metabolic process (GO:0019538)	4416	6	19.7	-	0.3	0.000175	0.032
regulation of nitrogen compound metabolic process (GO:0051171)	5937	8	26.48	-	0.3	4.44e-06	0.00114
regulation of primary metabolic process (GO:0080090)	6135	8	27.36	-	0.29	1.73e-06	0.00052
regulation of cellular metabolic process (GO:0031323)	6347	8	28.31	-	0.28	6.51e-07	0.000215
regulation of macromolecule metabolic process (GO:0060255)	6508	8	29.03	-	0.28	3.93e-07	0.000136
cellular macromolecule metabolic process (GO:0044260)	5152	6	22.98	-	0.26	8.87e-06	0.00207
regulation of response to stimulus (GO:0048583)	4391	5	19.58	-	0.26	5.35e-05	0.0109
regulation of metabolic process (GO:0019222)	7059	8	31.48	-	0.25	1.69e-08	8.42e-06
macromolecule metabolic process (GO:0043170)	6340	7	28.28	-	0.25	1.65e-07	6.38e-05
negative regulation of biological process (GO:0048519)	5618	6	25.06	-	0.24	8.4e-07	0.000273
negative regulation of cellular process (GO:0048523)	4955	5	22.1	-	0.23	3.66e-06	0.000954
response to chemical (GO:0042221)	4414	4	19.69	-	0.2	9.01e-06	0.00208
cellular nitrogen compound metabolic process (GO:0034641)	3400	3	15.16	-	0.2	0.000178	0.0321
regulation of nucleic acid-templated transcription (GO:1903506)	3549	3	15.83	-	0.19	7.39e-05	0.0143
regulation of RNA biosynthetic process (GO:2001141)	3554	3	15.85	-	0.19	7.4e-05	0.0142
regulation of RNA metabolic process (GO:0051252)	3821	3	17.04	-	0.18	2e-05	0.00429
regulation of macromolecule biosynthetic process (GO:0010556)	4064	3	18.13	-	0.17	8.28e-06	0.00197
regulation of nucleobase-containing compound metabolic process (GO:0019219)	4090	3	18.24	-	0.16	5.21e-06	0.00129
regulation of cellular biosynthetic process (GO:0031326)	4216	3	18.8	-	0.16	3.22e-06	0.000854
regulation of biosynthetic process (GO:0009889)	4297	3	19.17	-	0.16	2.03e-06	0.000586
regulation of gene expression (GO:0010468)	4907	2	21.89	-	0.09	1.01e-08	5.16e-06
negative regulation of nitrogen compound metabolic process (GO:0051172)	2486	1	11.09	-	0.09	0.000163	0.0302
negative regulation of cellular metabolic process (GO:0031324)	2685	1	11.98	-	0.08	6.8e-05	0.0133
negative regulation of macromolecule metabolic process (GO:0010605)	2928	1	13.06	-	0.08	2.91e-05	0.00616
negative regulation of metabolic process (GO:0009892)	3178	1	14.17	-	0.07	7.15e-06	0.00172
regulation of multicellular organismal process (GO:0051239)	3243	1	14.46	-	0.07	4.48e-06	0.00113
regulation of transcription, DNA-templated (GO:0006355)	3478	1	15.51	-	0.06	1.76e-06	0.000519
regulation of cellular macromolecule biosynthetic process (GO:2000112)	3939	1	17.57	-	0.06	1.49e-07	5.9e-05
regulation of transcription by RNA polymerase II (GO:0006357)	2593	0	11.57	-	< 0.01	9.08e-06	0.00206
positive regulation of gene expression (GO:0010628)	2305	0	10.28	-	< 0.01	3.56e-05	0.00744

## Sheet: Table 3 C7orf25
C7orf25
Analysis Type:	PANTHER Overrepresentation Test (Released 20200728)
Annotation Version and Release Date:	GO Ontology database DOI: 10.5281/zenodo.3980761 Released 2020-08-10
Analyzed List:	Client Text Box Input (Homo sapiens)
Reference List:	Homo sapiens (all genes in database)
Test Type:	FISHER
Correction:	FDR
GO biological process complete	Homo sapiens - REFLIST (20851)	Client Text Box Input (89)	Client Text Box Input (expected)	Client Text Box Input (over/under)	Client Text Box Input (fold Enrichment)	Client Text Box Input (raw P-value)	Client Text Box Input (FDR)	Category
proteasome assembly (GO:0043248)	14	3	0.06	+	50.2	4.83e-05	0.00826	Ubiquitin-proteasome
G1 phase (GO:0051318)	21	3	0.09	+	33.47	0.000141	0.0196
mitotic G1 phase (GO:0000080)	21	3	0.09	+	33.47	0.000141	0.0195	Mitotic cell cycle
protein K11-linked ubiquitination (GO:0070979)	29	3	0.12	+	24.24	0.000337	0.0369	Ubiquitin-proteasome
regulation of mRNA 3'-end processing (GO:0031440)	29	3	0.12	+	24.24	0.000337	0.0367	mRNA metabolic process
mitotic interphase (GO:0051329)	79	7	0.34	+	20.76	8.07e-08	8.55e-05
interphase (GO:0051325)	79	7	0.34	+	20.76	8.07e-08	8.01e-05
anaphase-promoting complex-dependent catabolic process (GO:0031145)	86	7	0.37	+	19.07	1.39e-07	0.00011	Ubiquitin-proteasome
S phase (GO:0051320)	65	5	0.28	+	18.02	1.21e-05	0.00299
mitotic S phase (GO:0000084)	65	5	0.28	+	18.02	1.21e-05	0.00295	Mitotic cell cycle
NIK/NF-kappaB signaling (GO:0038061)	80	6	0.34	+	17.57	1.78e-06	0.000725	Signal transduction and immune response
regulation of cellular amino acid metabolic process (GO:0006521)	67	5	0.29	+	17.48	1.38e-05	0.00319
regulation of mitotic metaphase/anaphase transition (GO:0030071)	57	4	0.24	+	16.44	0.000132	0.0193	Mitotic cell cycle
regulation of metaphase/anaphase transition of cell cycle (GO:1902099)	59	4	0.25	+	15.88	0.00015	0.0202
regulation of hematopoietic stem cell differentiation (GO:1902036)	74	5	0.32	+	15.83	2.18e-05	0.00468	Signal transduction and immune response
antigen processing and presentation of exogenous peptide antigen via MHC class I, TAP-dependent (GO:0002479)	76	5	0.32	+	15.41	2.46e-05	0.00514	Signal transduction and immune response
negative regulation of G2/M transition of mitotic cell cycle (GO:0010972)	92	6	0.39	+	15.28	3.82e-06	0.00135	Mitotic cell cycle
regulation of mitotic sister chromatid separation (GO:0010965)	62	4	0.26	+	15.11	0.00018	0.0234
regulation of transcription from RNA polymerase II promoter in response to hypoxia (GO:0061418)	78	5	0.33	+	15.02	2.77e-05	0.00557	RNA transcription
SCF-dependent proteasomal ubiquitin-dependent protein catabolic process (GO:0031146)	95	6	0.41	+	14.8	4.56e-06	0.00151	Ubiquitin-proteasome
interleukin-1-mediated signaling pathway (GO:0070498)	96	6	0.41	+	14.64	4.83e-06	0.00153	Signal transduction and immune response
antigen processing and presentation of exogenous peptide antigen via MHC class I (GO:0042590)	81	5	0.35	+	14.46	3.29e-05	0.00615
protein localization to vacuole (GO:0072665)	65	4	0.28	+	14.42	0.000213	0.0261
regulation of chromosome separation (GO:1905818)	67	4	0.29	+	13.99	0.000238	0.0285
antigen processing and presentation of peptide antigen via MHC class I (GO:0002474)	101	6	0.43	+	13.92	6.37e-06	0.00191
regulation of cellular amine metabolic process (GO:0033238)	86	5	0.37	+	13.62	4.32e-05	0.00771
negative regulation of cell cycle G2/M phase transition (GO:1902750)	104	6	0.44	+	13.52	7.47e-06	0.00212
regulation of hematopoietic progenitor cell differentiation (GO:1901532)	87	5	0.37	+	13.46	4.55e-05	0.00786
regulation of mitotic sister chromatid segregation (GO:0033047)	73	4	0.31	+	12.84	0.000326	0.0364
regulation of establishment of protein localization to mitochondrion (GO:1903747)	74	4	0.32	+	12.66	0.000342	0.0367
stimulatory C-type lectin receptor signaling pathway (GO:0002223)	113	6	0.48	+	12.44	1.17e-05	0.00301	Signal transduction and immune response
innate immune response activating cell surface receptor signaling pathway (GO:0002220)	116	6	0.5	+	12.12	1.35e-05	0.00316
Wnt signaling pathway, planar cell polarity pathway (GO:0060071)	97	5	0.41	+	12.08	7.46e-05	0.0119	Signal transduction and immune response
innate immune response-activating signal transduction (GO:0002758)	117	6	0.5	+	12.01	1.42e-05	0.00322
regulation of cellular response to heat (GO:1900034)	79	4	0.34	+	11.86	0.000434	0.0448
negative regulation of mitotic cell cycle phase transition (GO:1901991)	219	10	0.93	+	10.7	4.81e-08	5.88e-05
mRNA export from nucleus (GO:0006406)	110	5	0.47	+	10.65	0.000132	0.0195	mRNA metabolic process
mRNA-containing ribonucleoprotein complex export from nucleus (GO:0071427)	110	5	0.47	+	10.65	0.000132	0.0194
regulation of mRNA processing (GO:0050684)	154	7	0.66	+	10.65	5.66e-06	0.00176
regulation of establishment of planar polarity (GO:0090175)	112	5	0.48	+	10.46	0.000143	0.0196
regulation of transcription from RNA polymerase II promoter in response to stress (GO:0043618)	112	5	0.48	+	10.46	0.000143	0.0194
anaphase (GO:0051322)	157	7	0.67	+	10.45	6.39e-06	0.00188
mitotic anaphase (GO:0000090)	157	7	0.67	+	10.45	6.39e-06	0.00185	Mitotic cell cycle
negative regulation of cell cycle phase transition (GO:1901988)	235	10	1	+	9.97	9.06e-08	8e-05
regulation of stem cell differentiation (GO:2000736)	118	5	0.5	+	9.93	0.00018	0.0233
regulation of DNA-templated transcription in response to stress (GO:0043620)	118	5	0.5	+	9.93	0.00018	0.0231
regulation of mRNA stability (GO:0043488)	190	8	0.81	+	9.86	2.04e-06	0.000789	mRNA metabolic process
activation of innate immune response (GO:0002218)	145	6	0.62	+	9.69	4.52e-05	0.00789
M phase (GO:0000279)	171	7	0.73	+	9.59	1.09e-05	0.00294
mitotic M phase (GO:0000087)	171	7	0.73	+	9.59	1.09e-05	0.00289
regulation of RNA stability (GO:0043487)	199	8	0.85	+	9.42	2.83e-06	0.00107
tumor necrosis factor-mediated signaling pathway (GO:0033209)	125	5	0.53	+	9.37	0.000233	0.0281	Signal transduction and immune response
regulation of mRNA metabolic process (GO:1903311)	350	14	1.49	+	9.37	4.21e-10	1.67e-06
ribonucleoprotein complex export from nucleus (GO:0071426)	127	5	0.54	+	9.22	0.000251	0.0297
ribonucleoprotein complex localization (GO:0071166)	128	5	0.55	+	9.15	0.00026	0.0299
T cell receptor signaling pathway (GO:0050852)	182	7	0.78	+	9.01	1.61e-05	0.00361	Signal transduction and immune response
mRNA transport (GO:0051028)	158	6	0.67	+	8.9	7.15e-05	0.0115
regulation of mRNA catabolic process (GO:0061013)	212	8	0.9	+	8.84	4.45e-06	0.0015
biological phase (GO:0044848)	270	10	1.15	+	8.68	3.12e-07	0.000199
RNA export from nucleus (GO:0006405)	135	5	0.58	+	8.68	0.000329	0.0366
mitotic cell cycle phase (GO:0098763)	270	10	1.15	+	8.68	3.12e-07	0.000191
non-canonical Wnt signaling pathway (GO:0035567)	135	5	0.58	+	8.68	0.000329	0.0363
cell cycle phase (GO:0022403)	270	10	1.15	+	8.68	3.12e-07	0.000184
regulation of G2/M transition of mitotic cell cycle (GO:0010389)	198	7	0.85	+	8.28	2.72e-05	0.00554
response to interleukin-1 (GO:0070555)	201	7	0.86	+	8.16	2.98e-05	0.00571
Fc-epsilon receptor signaling pathway (GO:0038095)	173	6	0.74	+	8.13	0.000116	0.0179	Signal transduction and immune response
cellular response to interleukin-1 (GO:0071347)	176	6	0.75	+	7.99	0.000127	0.019
protein polyubiquitination (GO:0000209)	326	11	1.39	+	7.91	1.9e-07	0.000126
antigen processing and presentation of exogenous peptide antigen (GO:0002478)	178	6	0.76	+	7.9	0.000135	0.0189
positive regulation of innate immune response (GO:0045089)	212	7	0.9	+	7.74	4.14e-05	0.00766
regulation of cell cycle G2/M phase transition (GO:1902749)	215	7	0.92	+	7.63	4.52e-05	0.00798
antigen processing and presentation of exogenous antigen (GO:0019884)	186	6	0.79	+	7.56	0.00017	0.0223
negative regulation of mitotic cell cycle (GO:0045930)	310	10	1.32	+	7.56	1.06e-06	0.000466
RNA localization (GO:0006403)	225	7	0.96	+	7.29	5.97e-05	0.00977
regulation of mitotic cell cycle phase transition (GO:1901990)	419	13	1.79	+	7.27	3.48e-08	4.6e-05
protein-containing complex disassembly (GO:0032984)	226	7	0.96	+	7.26	6.13e-05	0.00994
antigen processing and presentation of peptide antigen (GO:0048002)	194	6	0.83	+	7.25	0.000212	0.0261
negative regulation of cell cycle process (GO:0010948)	327	10	1.4	+	7.16	1.68e-06	0.000723
RNA transport (GO:0050658)	201	6	0.86	+	6.99	0.000255	0.03
nucleic acid transport (GO:0050657)	201	6	0.86	+	6.99	0.000255	0.0298
establishment of RNA localization (GO:0051236)	203	6	0.87	+	6.92	0.000269	0.0307
regulation of cell cycle phase transition (GO:1901987)	456	13	1.95	+	6.68	9.04e-08	8.46e-05
positive regulation of response to biotic stimulus (GO:0002833)	252	7	1.08	+	6.51	0.000119	0.0181
proteasome-mediated ubiquitin-dependent protein catabolic process (GO:0043161)	327	9	1.4	+	6.45	1.3e-05	0.00309
antigen processing and presentation (GO:0019882)	223	6	0.95	+	6.3	0.000437	0.0448
mRNA processing (GO:0006397)	486	13	2.07	+	6.27	1.85e-07	0.000128
mRNA splicing, via spliceosome (GO:0000398)	303	8	1.29	+	6.19	5.39e-05	0.00911	mRNA metabolic process
RNA splicing, via transesterification reactions with bulged adenosine as nucleophile (GO:0000377)	303	8	1.29	+	6.19	5.39e-05	0.00901
RNA splicing, via transesterification reactions (GO:0000375)	306	8	1.31	+	6.12	5.76e-05	0.00954
proteasomal protein catabolic process (GO:0010498)	349	9	1.49	+	6.04	2.15e-05	0.00469
protein deubiquitination (GO:0016579)	278	7	1.19	+	5.9	0.000214	0.0259	Ubiquitin-proteasome
RNA splicing (GO:0008380)	407	10	1.74	+	5.76	1.1e-05	0.00287
protein modification by small protein removal (GO:0070646)	296	7	1.26	+	5.54	0.00031	0.0349
modification-dependent macromolecule catabolic process (GO:0043632)	556	13	2.37	+	5.48	8.16e-07	0.000393
posttranscriptional regulation of gene expression (GO:0010608)	557	13	2.38	+	5.47	8.33e-07	0.000389
antigen receptor-mediated signaling pathway (GO:0050851)	301	7	1.28	+	5.45	0.000342	0.037
cell-cell signaling by wnt (GO:0198738)	346	8	1.48	+	5.42	0.000132	0.0191
Wnt signaling pathway (GO:0016055)	346	8	1.48	+	5.42	0.000132	0.019
regulation of innate immune response (GO:0045088)	304	7	1.3	+	5.39	0.000363	0.0384
ubiquitin-dependent protein catabolic process (GO:0006511)	538	12	2.3	+	5.23	3.61e-06	0.0013
modification-dependent protein catabolic process (GO:0019941)	545	12	2.33	+	5.16	4.11e-06	0.00142
regulation of mitotic cell cycle (GO:0007346)	638	14	2.72	+	5.14	6.2e-07	0.000318
transcription by RNA polymerase II (GO:0006366)	419	9	1.79	+	5.03	8.58e-05	0.0135	RNA transcription
mRNA metabolic process (GO:0016071)	698	14	2.98	+	4.7	1.75e-06	0.000734
proteolysis involved in cellular protein catabolic process (GO:0051603)	601	12	2.57	+	4.68	1.08e-05	0.00296
regulation of cell cycle process (GO:0010564)	762	15	3.25	+	4.61	9.01e-07	0.000409
protein modification by small protein conjugation (GO:0032446)	821	16	3.5	+	4.57	4.23e-07	0.000224
regulation of response to biotic stimulus (GO:0002831)	411	8	1.75	+	4.56	0.000413	0.0429
cell surface receptor signaling pathway involved in cell-cell signaling (GO:1905114)	417	8	1.78	+	4.49	0.000454	0.0462
cellular protein catabolic process (GO:0044257)	633	12	2.7	+	4.44	1.79e-05	0.00396
protein catabolic process (GO:0030163)	688	13	2.94	+	4.43	8.03e-06	0.00224
protein ubiquitination (GO:0016567)	743	14	3.17	+	4.41	3.57e-06	0.00132
RNA processing (GO:0006396)	924	17	3.94	+	4.31	3.86e-07	0.000212
negative regulation of cell cycle (GO:0045786)	573	10	2.45	+	4.09	0.000183	0.0233
protein modification by small protein conjugation or removal (GO:0070647)	1032	18	4.4	+	4.09	3.59e-07	0.000204
gene expression (GO:0010467)	2112	36	9.01	+	3.99	8.32e-14	1.32e-09
RNA metabolic process (GO:0016070)	1628	27	6.95	+	3.89	5.52e-10	1.76e-06
regulation of catabolic process (GO:0009894)	1043	17	4.45	+	3.82	1.99e-06	0.000791
nucleic acid metabolic process (GO:0090304)	2240	34	9.56	+	3.56	1.4e-11	1.11e-07
viral process (GO:0016032)	816	12	3.48	+	3.45	0.000195	0.0243
symbiotic process (GO:0044403)	908	13	3.88	+	3.35	0.000134	0.0191
macromolecule catabolic process (GO:0009057)	1057	15	4.51	+	3.32	4.27e-05	0.00772
regulation of cell cycle (GO:0051726)	1201	17	5.13	+	3.32	1.26e-05	0.00303
cellular macromolecule catabolic process (GO:0044265)	922	13	3.94	+	3.3	0.000156	0.0208
regulation of cellular catabolic process (GO:0031329)	879	12	3.75	+	3.2	0.000381	0.0398
nucleobase-containing compound metabolic process (GO:0006139)	2740	35	11.7	+	2.99	7.08e-10	1.87e-06
heterocycle metabolic process (GO:0046483)	2936	36	12.53	+	2.87	1.09e-09	2.17e-06
cellular aromatic compound metabolic process (GO:0006725)	2984	36	12.74	+	2.83	1.7e-09	3e-06
protein-containing complex subunit organization (GO:0043933)	1551	18	6.62	+	2.72	9.06e-05	0.0141
cellular nitrogen compound metabolic process (GO:0034641)	3400	39	14.51	+	2.69	1.02e-09	2.31e-06
cellular response to stress (GO:0033554)	1749	20	7.47	+	2.68	4.18e-05	0.00763
organic cyclic compound metabolic process (GO:1901360)	3216	36	13.73	+	2.62	1.28e-08	2.03e-05
cellular macromolecule biosynthetic process (GO:0034645)	1647	18	7.03	+	2.56	0.000192	0.024
cellular nitrogen compound biosynthetic process (GO:0044271)	1577	17	6.73	+	2.53	0.000349	0.0372
macromolecule biosynthetic process (GO:0009059)	1699	18	7.25	+	2.48	0.00028	0.0318
macromolecule metabolic process (GO:0043170)	6340	57	27.06	+	2.11	7.59e-11	4.02e-07
regulation of nucleobase-containing compound metabolic process (GO:0019219)	4090	36	17.46	+	2.06	6.19e-06	0.00189
regulation of RNA metabolic process (GO:0051252)	3821	33	16.31	+	2.02	2.8e-05	0.0055
cellular protein metabolic process (GO:0044267)	3829	33	16.34	+	2.02	2.91e-05	0.00563
cellular macromolecule metabolic process (GO:0044260)	5152	44	21.99	+	2	7.52e-07	0.000374
macromolecule modification (GO:0043412)	3420	29	14.6	+	1.99	0.000157	0.0207
regulation of cellular macromolecule biosynthetic process (GO:2000112)	3939	32	16.81	+	1.9	0.000186	0.0234
regulation of gene expression (GO:0010468)	4907	39	20.94	+	1.86	2.62e-05	0.0054
protein metabolic process (GO:0019538)	4416	35	18.85	+	1.86	0.000122	0.0184
nitrogen compound metabolic process (GO:0006807)	7092	56	30.27	+	1.85	3.21e-08	4.64e-05
regulation of macromolecule biosynthetic process (GO:0010556)	4064	32	17.35	+	1.84	0.000258	0.0299
cellular metabolic process (GO:0044237)	7790	59	33.25	+	1.77	5.77e-08	6.55e-05
regulation of cellular metabolic process (GO:0031323)	6347	48	27.09	+	1.77	4.59e-06	0.00149
primary metabolic process (GO:0044238)	7575	57	32.33	+	1.76	1.8e-07	0.00013
regulation of primary metabolic process (GO:0080090)	6135	46	26.19	+	1.76	1.19e-05	0.00299
regulation of nitrogen compound metabolic process (GO:0051171)	5937	44	25.34	+	1.74	3.06e-05	0.00578
organic substance metabolic process (GO:0071704)	8009	59	34.19	+	1.73	1.42e-07	0.000107
regulation of macromolecule metabolic process (GO:0060255)	6508	47	27.78	+	1.69	2.77e-05	0.00551
metabolic process (GO:0008152)	8590	62	36.67	+	1.69	1.03e-07	8.58e-05
regulation of metabolic process (GO:0019222)	7059	50	30.13	+	1.66	2.38e-05	0.00504
nervous system development (GO:0007399)	2432	1	10.38	-	0.1	0.000368	0.0387

## Sheet: Table 4 Cxorf58
Cxorf58
Analysis Type:	PANTHER Overrepresentation Test (Released 20200728)
Annotation Version and Release Date:	GO Ontology database DOI: 10.5281/zenodo.3980761 Released 2020-08-10
Analyzed List:	Client Text Box Input (Homo sapiens)
Reference List:	Homo sapiens (all genes in database)
Test Type:	FISHER
Correction:	FDR
GO biological process complete	Homo sapiens - REFLIST (20851)	Client Text Box Input (92)	Client Text Box Input (expected)	Client Text Box Input (over/under)	Client Text Box Input (fold Enrichment)	Client Text Box Input (raw P-value)	Client Text Box Input (FDR)
axoneme assembly (GO:0035082)	73	6	0.32	+	18.63	1.31e-06	0.00189
cilium movement (GO:0003341)	135	11	0.6	+	18.47	4.28e-11	3.4e-07
microtubule bundle formation (GO:0001578)	104	6	0.46	+	13.08	9.04e-06	0.00845
cilium organization (GO:0044782)	374	18	1.65	+	10.91	8.95e-14	1.42e-09
microtubule-based movement (GO:0007018)	342	15	1.51	+	9.94	4.44e-11	2.35e-07
homophilic cell adhesion via plasma membrane adhesion molecules (GO:0007156)	167	7	0.74	+	9.5	1.17e-05	0.0098
cilium assembly (GO:0060271)	352	14	1.55	+	9.01	7.11e-10	2.82e-06
microtubule-based transport (GO:0099111)	190	7	0.84	+	8.35	2.61e-05	0.0189
cell projection assembly (GO:0030031)	464	15	2.05	+	7.33	2.57e-09	8.18e-06
plasma membrane bounded cell projection assembly (GO:0120031)	447	14	1.97	+	7.1	1.36e-08	3.59e-05
microtubule-based process (GO:0007017)	799	17	3.53	+	4.82	8.46e-08	0.000168
organelle assembly (GO:0070925)	765	14	3.38	+	4.15	7.39e-06	0.00734
cell projection organization (GO:0030030)	1196	21	5.28	+	3.98	5.13e-08	0.000117
plasma membrane bounded cell projection organization (GO:0120036)	1149	19	5.07	+	3.75	6.15e-07	0.000978
biological regulation (GO:0065007)	12625	35	55.7	-	0.63	1.51e-05	0.012
regulation of biological process (GO:0050789)	11953	30	52.74	-	0.57	2.26e-06	0.00299
regulation of cellular process (GO:0050794)	11396	28	50.28	-	0.56	4.29e-06	0.00524
response to stimulus (GO:0050896)	8531	17	37.64	-	0.45	5.84e-06	0.00619
regulation of metabolic process (GO:0019222)	7059	13	31.15	-	0.42	3.25e-05	0.0216
regulation of cellular metabolic process (GO:0031323)	6347	11	28	-	0.39	5.32e-05	0.0338
regulation of macromolecule metabolic process (GO:0060255)	6508	11	28.71	-	0.38	2.3e-05	0.0174
regulation of nitrogen compound metabolic process (GO:0051171)	5937	10	26.2	-	0.38	6.69e-05	0.0409
regulation of primary metabolic process (GO:0080090)	6135	10	27.07	-	0.37	2.9e-05	0.0201
cellular response to stimulus (GO:0051716)	6799	11	30	-	0.37	9.16e-06	0.00809
positive regulation of cellular process (GO:0048522)	5680	7	25.06	-	0.28	4.91e-06	0.00557
positive regulation of biological process (GO:0048518)	6272	7	27.67	-	0.25	2.59e-07	0.000458

## Sheet: Table 5 RSRP1
RSRP1
Analysis Type:	PANTHER Overrepresentation Test (Released 20200728)
Annotation Version and Release Date:	GO Ontology database DOI: 10.5281/zenodo.3980761 Released 2020-08-10
Analyzed List:	Client Text Box Input (Homo sapiens)
Reference List:	Homo sapiens (all genes in database)
Test Type:	FISHER
Correction:	FDR
GO biological process complete	Homo sapiens - REFLIST (20851)	Client Text Box Input (94)	Client Text Box Input (expected)	Client Text Box Input (over/under)	Client Text Box Input (fold Enrichment)	Client Text Box Input (raw P-value)	Client Text Box Input (FDR)	Category
regulation of RNA splicing (GO:0043484)	158	7	0.71	+	9.83	9.55e-06	0.0117	RNA splicing
peptidyl-serine modification (GO:0018209)	205	7	0.92	+	7.57	4.79e-05	0.0231	peptidyl-serine modification
mRNA splicing, via spliceosome (GO:0000398)	303	9	1.37	+	6.59	1.13e-05	0.0128	RNA splicing
RNA splicing, via transesterification reactions with bulged adenosine as nucleophile (GO:0000377)	303	9	1.37	+	6.59	1.13e-05	0.012
RNA splicing, via transesterification reactions (GO:0000375)	306	9	1.38	+	6.52	1.22e-05	0.0108
mRNA processing (GO:0006397)	486	12	2.19	+	5.48	2.33e-06	0.00463
RNA splicing (GO:0008380)	407	10	1.83	+	5.45	1.79e-05	0.0129
mRNA metabolic process (GO:0016071)	698	16	3.15	+	5.08	1.09e-07	0.000862
peptidyl-amino acid modification (GO:0018193)	899	17	4.05	+	4.19	5.97e-07	0.0019
RNA processing (GO:0006396)	924	14	4.17	+	3.36	7.33e-05	0.0315
RNA metabolic process (GO:0016070)	1628	22	7.34	+	3	2.86e-06	0.00505
positive regulation of transcription, DNA-templated (GO:0045893)	1536	19	6.92	+	2.74	5.2e-05	0.0243	positive regulation of transcription, DNA-templated
positive regulation of nucleic acid-templated transcription (GO:1903508)	1623	19	7.32	+	2.6	0.000108	0.0407
positive regulation of RNA biosynthetic process (GO:1902680)	1624	19	7.32	+	2.6	0.000109	0.0401
positive regulation of RNA metabolic process (GO:0051254)	1715	20	7.73	+	2.59	7.21e-05	0.0318
nucleic acid metabolic process (GO:0090304)	2240	26	10.1	+	2.57	4.7e-06	0.00679
positive regulation of nucleobase-containing compound metabolic process (GO:0045935)	1886	21	8.5	+	2.47	8.85e-05	0.0352
nucleobase-containing compound metabolic process (GO:0006139)	2740	28	12.35	+	2.27	2.16e-05	0.0137
regulation of RNA metabolic process (GO:0051252)	3821	39	17.23	+	2.26	2.76e-07	0.0011
regulation of nucleobase-containing compound metabolic process (GO:0019219)	4090	41	18.44	+	2.22	1.35e-07	0.000717
regulation of gene expression (GO:0010468)	4907	49	22.12	+	2.22	2.38e-09	3.79e-05
regulation of transcription, DNA-templated (GO:0006355)	3478	34	15.68	+	2.17	5.09e-06	0.00674
cellular protein modification process (GO:0006464)	3195	31	14.4	+	2.15	1.95e-05	0.0135
protein modification process (GO:0036211)	3195	31	14.4	+	2.15	1.95e-05	0.0129
regulation of nucleic acid-templated transcription (GO:1903506)	3549	34	16	+	2.13	1.14e-05	0.0113
regulation of RNA biosynthetic process (GO:2001141)	3554	34	16.02	+	2.12	1.15e-05	0.0108
heterocycle metabolic process (GO:0046483)	2936	28	13.24	+	2.12	7.94e-05	0.0332
macromolecule modification (GO:0043412)	3420	32	15.42	+	2.08	3.26e-05	0.0173
regulation of cellular macromolecule biosynthetic process (GO:2000112)	3939	36	17.76	+	2.03	1.45e-05	0.0115
negative regulation of metabolic process (GO:0009892)	3178	29	14.33	+	2.02	0.000135	0.0488
regulation of macromolecule biosynthetic process (GO:0010556)	4064	36	18.32	+	1.96	2.23e-05	0.0136
regulation of cellular biosynthetic process (GO:0031326)	4216	37	19.01	+	1.95	2.53e-05	0.0149
regulation of biosynthetic process (GO:0009889)	4297	37	19.37	+	1.91	3.22e-05	0.0177
macromolecule metabolic process (GO:0043170)	6340	52	28.58	+	1.82	7.44e-07	0.00197
regulation of macromolecule metabolic process (GO:0060255)	6508	52	29.34	+	1.77	1.7e-06	0.00387
regulation of nitrogen compound metabolic process (GO:0051171)	5937	46	26.77	+	1.72	2.95e-05	0.0168
regulation of metabolic process (GO:0019222)	7059	54	31.82	+	1.7	3.19e-06	0.00507
regulation of cellular metabolic process (GO:0031323)	6347	48	28.61	+	1.68	3.98e-05	0.0198
regulation of primary metabolic process (GO:0080090)	6135	46	27.66	+	1.66	9.09e-05	0.0352
primary metabolic process (GO:0044238)	7575	55	34.15	+	1.61	1.37e-05	0.0115
nitrogen compound metabolic process (GO:0006807)	7092	51	31.97	+	1.6	6.93e-05	0.0315
organic substance metabolic process (GO:0071704)	8009	57	36.11	+	1.58	1.62e-05	0.0123
cellular metabolic process (GO:0044237)	7790	55	35.12	+	1.57	3.92e-05	0.0201
metabolic process (GO:0008152)	8590	58	38.73	+	1.5	8.35e-05	0.034

## Sheet: Table 6 SMLR1
SMLR1
Analysis Type:	PANTHER Overrepresentation Test (Released 20200728)
Annotation Version and Release Date:	GO Ontology database DOI: 10.5281/zenodo.3980761 Released 2020-08-10
Analyzed List:	Client Text Box Input (Homo sapiens)
Reference List:	Homo sapiens (all genes in database)
Test Type:	FISHER
Correction:	FDR
GO biological process complete	Homo sapiens - REFLIST (20851)	Client Text Box Input (86)	Client Text Box Input (expected)	Client Text Box Input (over/under)	Client Text Box Input (fold Enrichment)	Client Text Box Input (raw P-value)	Client Text Box Input (FDR)	Category
negative regulation of intestinal cholesterol absorption (GO:0045796)	2	2	0.01	+	> 100	9.95e-05	0.013	lipid metabolism, transport, assembly, remodeling and homeostasis
negative regulation of intestinal lipid absorption (GO:1904730)	2	2	0.01	+	> 100	9.95e-05	0.0129
negative regulation of intestinal phytosterol absorption (GO:0010949)	2	2	0.01	+	> 100	9.95e-05	0.0128	lipid metabolism, transport, assembly, remodeling and homeostasis
positive regulation of very-low-density lipoprotein particle remodeling (GO:0010902)	2	2	0.01	+	> 100	9.95e-05	0.0127	lipid metabolism, transport, assembly, remodeling and homeostasis
alkaloid catabolic process (GO:0009822)	3	2	0.01	+	> 100	0.000165	0.0192	other liver or kidney related metabolic processes
negative regulation of intestinal absorption (GO:1904479)	3	2	0.01	+	> 100	0.000165	0.0191
regulation of very-low-density lipoprotein particle remodeling (GO:0010901)	5	3	0.02	+	> 100	3.69e-06	0.000826
hydrogen sulfide biosynthetic process (GO:0070814)	4	2	0.02	+	> 100	0.000247	0.0271	small molecule metabolism
negative regulation of very-low-density lipoprotein particle clearance (GO:0010916)	4	2	0.02	+	> 100	0.000247	0.0269	lipid metabolism, transport, assembly, remodeling and homeostasis
regulation of very-low-density lipoprotein particle clearance (GO:0010915)	4	2	0.02	+	> 100	0.000247	0.0268
monoterpenoid metabolic process (GO:0016098)	6	3	0.02	+	> 100	5.52e-06	0.00114
lipid hydroxylation (GO:0002933)	7	3	0.03	+	> 100	7.86e-06	0.00152
triglyceride-rich lipoprotein particle clearance (GO:0071830)	8	3	0.03	+	90.92	1.08e-05	0.00204
chylomicron remnant clearance (GO:0034382)	8	3	0.03	+	90.92	1.08e-05	0.00202	lipid metabolism, transport, assembly, remodeling and homeostasis
chylomicron assembly (GO:0034378)	11	4	0.05	+	88.16	3.5e-07	0.000126	lipid metabolism, transport, assembly, remodeling and homeostasis
transsulfuration (GO:0019346)	6	2	0.02	+	80.82	0.00046	0.0465	small molecule metabolism
hydrogen sulfide metabolic process (GO:0070813)	6	2	0.02	+	80.82	0.00046	0.0462
regulation of intestinal lipid absorption (GO:1904729)	9	3	0.04	+	80.82	1.43e-05	0.00248
homoserine metabolic process (GO:0009092)	6	2	0.02	+	80.82	0.00046	0.0459
regulation of intestinal cholesterol absorption (GO:0030300)	9	3	0.04	+	80.82	1.43e-05	0.00245
very-low-density lipoprotein particle clearance (GO:0034447)	6	2	0.02	+	80.82	0.00046	0.0456	lipid metabolism, transport, assembly, remodeling and homeostasis
chylomicron remodeling (GO:0034371)	9	3	0.04	+	80.82	1.43e-05	0.00242
very-low-density lipoprotein particle assembly (GO:0034379)	13	4	0.05	+	74.6	6.06e-07	0.000205
triglyceride-rich lipoprotein particle remodeling (GO:0034370)	13	4	0.05	+	74.6	6.06e-07	0.000201
intestinal cholesterol absorption (GO:0030299)	10	3	0.04	+	72.74	1.86e-05	0.00311
negative regulation of cholesterol transport (GO:0032375)	14	4	0.06	+	69.27	7.77e-07	0.000242
negative regulation of sterol transport (GO:0032372)	14	4	0.06	+	69.27	7.77e-07	0.000237
regulation of intestinal absorption (GO:1904478)	11	3	0.05	+	66.12	2.36e-05	0.00382
lipoprotein transport (GO:0042953)	15	4	0.06	+	64.65	9.81e-07	0.000278	lipid metabolism, transport, assembly, remodeling and homeostasis
oxidative demethylation (GO:0070989)	19	5	0.08	+	63.8	4.15e-08	1.78e-05	other processes
cholesterol efflux (GO:0033344)	23	6	0.09	+	63.25	1.77e-09	1.22e-06	lipid metabolism, transport, assembly, remodeling and homeostasis
phospholipid efflux (GO:0033700)	12	3	0.05	+	60.61	2.94e-05	0.00458	lipid metabolism, transport, assembly, remodeling and homeostasis
lipoprotein localization (GO:0044872)	16	4	0.07	+	60.61	1.22e-06	0.000329
intestinal lipid absorption (GO:0098856)	12	3	0.05	+	60.61	2.94e-05	0.00453
regulation of triglyceride catabolic process (GO:0010896)	14	3	0.06	+	51.95	4.36e-05	0.00642	lipid metabolism, transport, assembly, remodeling and homeostasis
plasma lipoprotein particle assembly (GO:0034377)	28	6	0.12	+	51.95	4.93e-09	2.7e-06
lipid digestion (GO:0044241)	15	3	0.06	+	48.49	5.22e-05	0.00748
protein-lipid complex assembly (GO:0065005)	32	6	0.13	+	45.46	1e-08	4.96e-06
intestinal absorption (GO:0050892)	32	6	0.13	+	45.46	1e-08	4.81e-06
drug catabolic process (GO:0042737)	27	5	0.11	+	44.9	1.92e-07	7.09e-05
triglyceride homeostasis (GO:0070328)	35	6	0.14	+	41.56	1.61e-08	7.54e-06	lipid metabolism, transport, assembly, remodeling and homeostasis
acylglycerol homeostasis (GO:0055090)	35	6	0.14	+	41.56	1.61e-08	7.32e-06
reverse cholesterol transport (GO:0043691)	18	3	0.07	+	40.41	8.44e-05	0.0112	lipid metabolism, transport, assembly, remodeling and homeostasis
regulation of lipoprotein particle clearance (GO:0010984)	18	3	0.07	+	40.41	8.44e-05	0.0111
exogenous drug catabolic process (GO:0042738)	25	4	0.1	+	38.79	5.83e-06	0.00119	other liver or kidney related metabolic processes
retinoic acid metabolic process (GO:0042573)	33	5	0.14	+	36.74	4.69e-07	0.000162	other liver or kidney related metabolic processes
triglyceride catabolic process (GO:0019433)	27	4	0.11	+	35.92	7.67e-06	0.00151	lipid metabolism, transport, assembly, remodeling and homeostasis
drug metabolic process (GO:0017144)	48	7	0.2	+	35.36	2.66e-09	1.63e-06
cholesterol transport (GO:0030301)	55	8	0.23	+	35.27	1.87e-10	2.13e-07
epoxygenase P450 pathway (GO:0019373)	21	3	0.09	+	34.64	0.000127	0.0158	other liver or kidney related metabolic processes
regulation of lipoprotein lipase activity (GO:0051004)	22	3	0.09	+	33.06	0.000144	0.0171	lipid metabolism, transport, assembly, remodeling and homeostasis
negative regulation of lipid transport (GO:0032369)	30	4	0.12	+	32.33	1.12e-05	0.00207
bile acid metabolic process (GO:0008206)	38	5	0.16	+	31.9	8.85e-07	0.00026
plasma lipoprotein particle remodeling (GO:0034369)	31	4	0.13	+	31.28	1.26e-05	0.00228
protein-lipid complex remodeling (GO:0034368)	31	4	0.13	+	31.28	1.26e-05	0.00225
estrogen metabolic process (GO:0008210)	32	4	0.13	+	30.31	1.41e-05	0.0025	lipid metabolism, transport, assembly, remodeling and homeostasis
protein-containing complex remodeling (GO:0034367)	32	4	0.13	+	30.31	1.41e-05	0.00247
plasma lipoprotein particle organization (GO:0071827)	49	6	0.2	+	29.69	9.93e-08	3.94e-05
bile acid and bile salt transport (GO:0015721)	35	4	0.14	+	27.71	1.96e-05	0.00324	lipid metabolism, transport, assembly, remodeling and homeostasis
protein-lipid complex subunit organization (GO:0071825)	53	6	0.22	+	27.45	1.52e-07	5.76e-05
sterol transport (GO:0015918)	71	8	0.29	+	27.32	1.2e-09	9.5e-07
positive regulation of lipid catabolic process (GO:0050996)	27	3	0.11	+	26.94	0.000251	0.0269	lipid metabolism, transport, assembly, remodeling and homeostasis
intermembrane lipid transfer (GO:0120009)	46	5	0.19	+	26.35	2.1e-06	0.000507	lipid metabolism, transport, assembly, remodeling and homeostasis
acylglycerol catabolic process (GO:0046464)	37	4	0.15	+	26.21	2.39e-05	0.00384
neutral lipid catabolic process (GO:0046461)	37	4	0.15	+	26.21	2.39e-05	0.0038
bile acid biosynthetic process (GO:0006699)	28	3	0.12	+	25.98	0.000277	0.0291	lipid metabolism, transport, assembly, remodeling and homeostasis
cholesterol homeostasis (GO:0042632)	86	9	0.35	+	25.37	1.91e-10	2.02e-07	lipid metabolism, transport, assembly, remodeling and homeostasis
retinol metabolic process (GO:0042572)	48	5	0.2	+	25.26	2.55e-06	0.000588	other liver or kidney related metabolic processes
sterol homeostasis (GO:0055092)	87	9	0.36	+	25.08	2.1e-10	2.09e-07
plasma lipoprotein particle clearance (GO:0034381)	40	4	0.16	+	24.25	3.18e-05	0.00481
regulation of cholesterol transport (GO:0032374)	53	5	0.22	+	22.87	4.01e-06	0.000874
regulation of sterol transport (GO:0032371)	54	5	0.22	+	22.45	4.37e-06	0.000939
demethylation (GO:0070988)	65	6	0.27	+	22.38	4.65e-07	0.000164
heme metabolic process (GO:0042168)	44	4	0.18	+	22.04	4.5e-05	0.00656	other liver or kidney related metabolic processes
terpenoid metabolic process (GO:0006721)	124	11	0.51	+	21.51	8.59e-12	1.71e-08
negative regulation of lipid localization (GO:1905953)	47	4	0.19	+	20.63	5.72e-05	0.00798
retinoid metabolic process (GO:0001523)	108	9	0.45	+	20.2	1.25e-09	9.44e-07
digestive system process (GO:0022600)	73	6	0.3	+	19.93	8.8e-07	0.000264
diterpenoid metabolic process (GO:0016101)	114	9	0.47	+	19.14	1.95e-09	1.29e-06
regulation of plasma lipoprotein particle levels (GO:0097006)	76	6	0.31	+	19.14	1.1e-06	0.000306
porphyrin-containing compound metabolic process (GO:0006778)	51	4	0.21	+	19.02	7.71e-05	0.0104
triglyceride metabolic process (GO:0006641)	77	6	0.32	+	18.89	1.18e-06	0.000323
isoprenoid metabolic process (GO:0006720)	143	11	0.59	+	18.65	3.62e-11	5.76e-08
xenobiotic metabolic process (GO:0006805)	120	9	0.49	+	18.18	2.98e-09	1.75e-06	other liver or kidney related metabolic processes
cellular response to xenobiotic stimulus (GO:0071466)	125	9	0.52	+	17.46	4.17e-09	2.36e-06
organic hydroxy compound transport (GO:0015850)	153	11	0.63	+	17.43	7.16e-11	9.49e-08
primary alcohol metabolic process (GO:0034308)	85	6	0.35	+	17.11	2.03e-06	0.000504
lipid homeostasis (GO:0055088)	145	10	0.6	+	16.72	8.07e-10	6.75e-07
response to xenobiotic stimulus (GO:0009410)	132	9	0.54	+	16.53	6.53e-09	3.46e-06
regulation of cholesterol metabolic process (GO:0090181)	59	4	0.24	+	16.44	0.000131	0.0161	lipid metabolism, transport, assembly, remodeling and homeostasis
regulation of lipid catabolic process (GO:0050994)	60	4	0.25	+	16.16	0.00014	0.0168
phospholipid transport (GO:0015914)	90	6	0.37	+	16.16	2.78e-06	0.00063
glycerolipid catabolic process (GO:0046503)	60	4	0.25	+	16.16	0.00014	0.0167
fatty acid transport (GO:0015908)	76	5	0.31	+	15.95	2.08e-05	0.00342	lipid metabolism, transport, assembly, remodeling and homeostasis
steroid metabolic process (GO:0008202)	257	16	1.06	+	15.09	1.92e-14	1.02e-10
cholesterol metabolic process (GO:0008203)	121	7	0.5	+	14.03	9.74e-07	0.000281	lipid metabolism, transport, assembly, remodeling and homeostasis
acylglycerol metabolic process (GO:0006639)	104	6	0.43	+	13.99	6.13e-06	0.00123
neutral lipid metabolic process (GO:0006638)	104	6	0.43	+	13.99	6.13e-06	0.00122
tetrapyrrole metabolic process (GO:0033013)	71	4	0.29	+	13.66	0.000258	0.0274
cellular hormone metabolic process (GO:0034754)	126	7	0.52	+	13.47	1.26e-06	0.000334
lipid transport (GO:0006869)	308	17	1.27	+	13.38	1.76e-14	1.4e-10
steroid biosynthetic process (GO:0006694)	127	7	0.52	+	13.36	1.33e-06	0.000345
secondary alcohol metabolic process (GO:1902652)	130	7	0.54	+	13.06	1.54e-06	0.000394
pigment metabolic process (GO:0042440)	75	4	0.31	+	12.93	0.000315	0.0328
digestion (GO:0007586)	113	6	0.47	+	12.87	9.64e-06	0.00185
organophosphate ester transport (GO:0015748)	136	7	0.56	+	12.48	2.05e-06	0.000501
sterol metabolic process (GO:0016125)	137	7	0.57	+	12.39	2.15e-06	0.000509
lipid localization (GO:0010876)	340	17	1.4	+	12.12	8.15e-14	3.24e-10
monocarboxylic acid transport (GO:0015718)	150	7	0.62	+	11.31	3.81e-06	0.000842
regulation of lipid localization (GO:1905952)	154	7	0.64	+	11.02	4.5e-06	0.000954
long-chain fatty acid metabolic process (GO:0001676)	114	5	0.47	+	10.63	0.000131	0.016
regulation of lipid transport (GO:0032368)	119	5	0.49	+	10.19	0.00016	0.0186
lipoprotein metabolic process (GO:0042157)	122	5	0.5	+	9.94	0.000178	0.0204	lipid metabolism, transport, assembly, remodeling and homeostasis
hormone metabolic process (GO:0042445)	196	8	0.81	+	9.9	1.96e-06	0.000495
regulation of steroid metabolic process (GO:0019218)	123	5	0.51	+	9.86	0.000185	0.0209
alcohol metabolic process (GO:0006066)	332	13	1.37	+	9.49	1.55e-09	1.12e-06
organic anion transport (GO:0015711)	478	18	1.97	+	9.13	1.4e-12	4.46e-09
regulation of humoral immune response (GO:0002920)	136	5	0.56	+	8.91	0.00029	0.0303	other processes
lipid catabolic process (GO:0016042)	304	11	1.25	+	8.77	6.74e-08	2.75e-05
organic hydroxy compound metabolic process (GO:1901615)	479	17	1.98	+	8.6	1.57e-11	2.77e-08
organic hydroxy compound biosynthetic process (GO:1901617)	175	6	0.72	+	8.31	0.000102	0.0128
positive regulation of small molecule metabolic process (GO:0062013)	153	5	0.63	+	7.92	0.000489	0.048	small molecule metabolism
carboxylic acid transport (GO:0046942)	309	10	1.27	+	7.85	7.45e-07	0.000242
organic acid transport (GO:0015849)	310	10	1.28	+	7.82	7.66e-07	0.000244
regulation of lipid biosynthetic process (GO:0046890)	198	6	0.82	+	7.35	0.000196	0.0219	lipid metabolism, transport, assembly, remodeling and homeostasis
anion transport (GO:0006820)	601	18	2.48	+	7.26	5.47e-11	7.91e-08
response to drug (GO:0042493)	402	12	1.66	+	7.24	1.25e-07	4.83e-05
cellular lipid catabolic process (GO:0044242)	205	6	0.85	+	7.1	0.000235	0.0259
monocarboxylic acid metabolic process (GO:0032787)	538	15	2.22	+	6.76	6.81e-09	3.49e-06
regulation of hormone levels (GO:0010817)	533	14	2.2	+	6.37	4.73e-08	1.98e-05
carboxylic acid biosynthetic process (GO:0046394)	312	8	1.29	+	6.22	5.15e-05	0.00743
organic acid biosynthetic process (GO:0016053)	313	8	1.29	+	6.2	5.26e-05	0.00746
lipid metabolic process (GO:0006629)	1219	30	5.03	+	5.97	6.65e-16	1.06e-11
fatty acid metabolic process (GO:0006631)	328	8	1.35	+	5.91	7.24e-05	0.00992
cellular lipid metabolic process (GO:0044255)	976	23	4.03	+	5.71	8.47e-12	1.92e-08
carboxylic acid metabolic process (GO:0019752)	900	21	3.71	+	5.66	9.83e-11	1.2e-07
sulfur compound metabolic process (GO:0006790)	367	8	1.51	+	5.29	0.000155	0.0182
oxoacid metabolic process (GO:0043436)	990	21	4.08	+	5.14	5.39e-10	5.04e-07
regulation of lipid metabolic process (GO:0019216)	429	9	1.77	+	5.09	7.83e-05	0.0105
organic acid metabolic process (GO:0006082)	1010	21	4.17	+	5.04	7.67e-10	6.77e-07
glycerolipid metabolic process (GO:0046486)	396	8	1.63	+	4.9	0.000256	0.0273
regulation of small molecule metabolic process (GO:0062012)	459	9	1.89	+	4.75	0.000129	0.0159
small molecule biosynthetic process (GO:0044283)	584	11	2.41	+	4.57	3.16e-05	0.00483
lipid biosynthetic process (GO:0008610)	602	11	2.48	+	4.43	4.14e-05	0.00615
small molecule metabolic process (GO:0044281)	1744	30	7.19	+	4.17	6.43e-12	1.7e-08
oxidation-reduction process (GO:0055114)	968	16	3.99	+	4.01	2.19e-06	0.000512
ion transport (GO:0006811)	1343	22	5.54	+	3.97	2.08e-08	9.17e-06
organic substance transport (GO:0071702)	2219	30	9.15	+	3.28	2.17e-09	1.38e-06
chemical homeostasis (GO:0048878)	1129	15	4.66	+	3.22	5.94e-05	0.0082
transmembrane transport (GO:0055085)	1295	16	5.34	+	3	7.65e-05	0.0104	other processes
catabolic process (GO:0009056)	2099	22	8.66	+	2.54	3.35e-05	0.00502
organic substance catabolic process (GO:1901575)	1782	18	7.35	+	2.45	0.00032	0.033
cellular catabolic process (GO:0044248)	1823	18	7.52	+	2.39	0.00042	0.0428
macromolecule localization (GO:0033036)	2550	23	10.52	+	2.19	0.000223	0.0248
transport (GO:0006810)	4562	38	18.82	+	2.02	4.89e-06	0.00102
establishment of localization (GO:0051234)	4694	38	19.36	+	1.96	1.2e-05	0.00218
organic cyclic compound metabolic process (GO:1901360)	3216	26	13.26	+	1.96	0.000485	0.0479
regulation of biological quality (GO:0065008)	4103	32	16.92	+	1.89	0.000182	0.0207
localization (GO:0051179)	5850	42	24.13	+	1.74	5.42e-05	0.00762
cellular metabolic process (GO:0044237)	7790	50	32.13	+	1.56	0.000119	0.0149
metabolic process (GO:0008152)	8590	55	35.43	+	1.55	2.43e-05	0.00382
organic substance metabolic process (GO:0071704)	8009	50	33.03	+	1.51	0.000321	0.0329

## Sheet: Table 7 TMEM53
TMEM53
Analysis Type:	PANTHER Overrepresentation Test (Released 20200728)
Annotation Version and Release Date:	GO Ontology database DOI: 10.5281/zenodo.3980761 Released 2020-08-10
Analyzed List:	Client Text Box Input (Homo sapiens)
Reference List:	Homo sapiens (all genes in database)
Test Type:	FISHER
Correction:	FDR
GO biological process complete	Homo sapiens - REFLIST (20851)	Client Text Box Input (92)	Client Text Box Input (expected)	Client Text Box Input (over/under)	Client Text Box Input (fold Enrichment)	Client Text Box Input (raw P-value)	Client Text Box Input (FDR)	Category
lipid hydroxylation (GO:0002933)	7	3	0.03	+	97.13	9.63e-06	0.0306	lipid metabolism, transport, absorption and homeostasis
nucleotide-sugar transmembrane transport (GO:0015780)	13	3	0.06	+	52.3	4.41e-05	0.0412	carbohydrate-related transport
estrogen metabolic process (GO:0008210)	32	4	0.14	+	28.33	1.84e-05	0.0419	lipid metabolism, transport, absorption and homeostasis
retinoic acid metabolic process (GO:0042573)	33	4	0.15	+	27.47	2.06e-05	0.0328	lipid metabolism, transport, absorption and homeostasis
carbohydrate transport (GO:0008643)	78	5	0.34	+	14.53	3.25e-05	0.0344	carbohydrate-related transport
xenobiotic metabolic process (GO:0006805)	120	6	0.53	+	11.33	1.97e-05	0.0347	xenobiotic metabolic process
cellular response to xenobiotic stimulus (GO:0071466)	125	6	0.55	+	10.88	2.45e-05	0.0325
cellular hormone metabolic process (GO:0034754)	126	6	0.56	+	10.79	2.56e-05	0.0313
response to xenobiotic stimulus (GO:0009410)	132	6	0.58	+	10.3	3.29e-05	0.0327
lipid modification (GO:0030258)	233	10	1.03	+	9.73	1.15e-07	0.00061
hormone metabolic process (GO:0042445)	196	7	0.86	+	8.09	3.16e-05	0.0359
alcohol metabolic process (GO:0006066)	332	9	1.46	+	6.14	1.92e-05	0.0381	alcohol metabolic process
lipid biosynthetic process (GO:0008610)	602	12	2.66	+	4.52	1.55e-05	0.041	lipid metabolism, transport, absorption and homeostasis
cellular lipid metabolic process (GO:0044255)	976	19	4.31	+	4.41	5.18e-08	0.000412
lipid metabolic process (GO:0006629)	1219	22	5.38	+	4.09	1.41e-08	0.000225
oxidation-reduction process (GO:0055114)	968	15	4.27	+	3.51	2.35e-05	0.034	oxidation-reduction process
small molecule metabolic process (GO:0044281)	1744	24	7.69	+	3.12	4.23e-07	0.00168
biosynthetic process (GO:0009058)	2863	28	12.63	+	2.22	4.68e-05	0.0413

## Sheet: Table 8 TMEM232
TMEM232
Analysis Type:	PANTHER Overrepresentation Test (Released 20200728)
Annotation Version and Release Date:	GO Ontology database DOI: 10.5281/zenodo.4081749 Released 2020-10-09
Analyzed List:	Client Text Box Input (Homo sapiens)
Reference List:	Homo sapiens (all genes in database)
Test Type:	FISHER
Correction:	FDR
GO biological process complete	Homo sapiens - REFLIST (20595)	Client Text Box Input (93)	Client Text Box Input (expected)	Client Text Box Input (over/under)	Client Text Box Input (fold Enrichment)	Client Text Box Input (raw P-value)	Client Text Box Input (FDR)	Category
inner dynein arm assembly (GO:0036159)	15	7	0.07	+	> 100	4.76e-12	3.59e-09	cilium assembly and organization
axonemal dynein complex assembly (GO:0070286)	35	12	0.16	+	75.93	1.5e-18	1.83e-15
regulation of cilium beat frequency (GO:0003356)	14	4	0.06	+	63.27	1.12e-06	0.00029	cilium movement
axoneme assembly (GO:0035082)	74	21	0.33	+	62.84	2.14e-30	1.13e-26
sperm axoneme assembly (GO:0007288)	19	5	0.09	+	58.28	6.54e-08	2.31e-05	cilium assembly and organization
outer dynein arm assembly (GO:0036158)	19	5	0.09	+	58.28	6.54e-08	2.26e-05	cilium assembly and organization
epithelial cilium movement involved in extracellular fluid movement (GO:0003351)	32	7	0.14	+	48.44	4.03e-10	2.67e-07	cilium movement
extracellular transport (GO:0006858)	35	7	0.16	+	44.29	7e-10	3.83e-07
microtubule bundle formation (GO:0001578)	105	21	0.47	+	44.29	1.35e-27	5.36e-24
cilium movement (GO:0003341)	142	27	0.64	+	42.11	6.06e-35	9.61e-31	cilium movement
cilium-dependent cell motility (GO:0060285)	108	19	0.49	+	38.96	4.57e-24	1.04e-20
cilium or flagellum-dependent cell motility (GO:0001539)	108	19	0.49	+	38.96	4.57e-24	9.07e-21
cilium movement involved in cell motility (GO:0060294)	97	15	0.44	+	34.25	2.1e-18	2.38e-15
regulation of cilium movement (GO:0003352)	39	6	0.18	+	34.07	4.96e-08	1.83e-05
sperm motility (GO:0097722)	89	13	0.4	+	32.35	8.66e-16	8.59e-13
flagellated sperm motility (GO:0030317)	89	13	0.4	+	32.35	8.66e-16	8.08e-13
regulation of microtubule-based movement (GO:0060632)	55	6	0.25	+	24.16	3.19e-07	9.73e-05
microtubule-based movement (GO:0007018)	345	32	1.56	+	20.54	1.85e-32	1.47e-28
cilium organization (GO:0044782)	379	29	1.71	+	16.94	4.31e-27	1.37e-23
cilium assembly (GO:0060271)	356	26	1.61	+	16.17	9.17e-24	1.62e-20
cell projection assembly (GO:0030031)	467	27	2.11	+	12.8	3.61e-22	5.73e-19
plasma membrane bounded cell projection assembly (GO:0120031)	450	26	2.03	+	12.79	2.47e-21	3.56e-18
determination of left/right symmetry (GO:0007368)	122	6	0.55	+	10.89	2.45e-05	0.00498	determination of left/right symmetry
determination of bilateral symmetry (GO:0009855)	128	6	0.58	+	10.38	3.17e-05	0.00613
specification of symmetry (GO:0009799)	129	6	0.58	+	10.3	3.31e-05	0.00624
microtubule-based process (GO:0007017)	809	36	3.65	+	9.85	4.06e-26	1.07e-22
spermatid development (GO:0007286)	160	7	0.72	+	9.69	1.04e-05	0.00223
microtubule-based transport (GO:0099111)	188	8	0.85	+	9.42	2.88e-06	0.000703
spermatid differentiation (GO:0048515)	166	7	0.75	+	9.34	1.31e-05	0.00277
microtubule cytoskeleton organization (GO:0000226)	574	23	2.59	+	8.87	1.44e-15	1.27e-12
organelle assembly (GO:0070925)	768	26	3.47	+	7.5	7.07e-16	7.47e-13
cell projection organization (GO:0030030)	1197	34	5.41	+	6.29	1.3e-18	1.71e-15
germ cell development (GO:0007281)	266	7	1.2	+	5.83	0.000232	0.0376
plasma membrane bounded cell projection organization (GO:0120036)	1151	30	5.2	+	5.77	2.35e-15	1.96e-12
movement of cell or subcellular component (GO:0006928)	1592	34	7.19	+	4.73	5.79e-15	4.6e-12
cytoskeleton organization (GO:0007010)	1216	23	5.49	+	4.19	4.05e-09	1.89e-06
localization of cell (GO:0051674)	1106	19	4.99	+	3.8	5e-07	0.000147
cell motility (GO:0048870)	1106	19	4.99	+	3.8	5e-07	0.000144
locomotion (GO:0040011)	1340	19	6.05	+	3.14	8.09e-06	0.00183
cellular component assembly (GO:0022607)	2384	27	10.77	+	2.51	4.63e-06	0.0011
Unclassified (UNCLASSIFIED)	2738	29	12.36	+	2.35	8.29e-06	0.00185
cellular component biogenesis (GO:0044085)	2644	27	11.94	+	2.26	3.3e-05	0.00632
organelle organization (GO:0006996)	3565	32	16.1	+	1.99	8.33e-05	0.0144
biological_process (GO:0008150)	17857	64	80.64	-	0.79	8.29e-06	0.00183
regulation of cellular process (GO:0050794)	11345	23	51.23	-	0.45	3.51e-09	1.74e-06
regulation of biological process (GO:0050789)	11904	24	53.75	-	0.45	5.6e-10	3.29e-07
biological regulation (GO:0065007)	12575	25	56.78	-	0.44	3.1e-11	2.23e-08
organonitrogen compound metabolic process (GO:1901564)	5402	8	24.39	-	0.33	2.76e-05	0.00555
response to stimulus (GO:0050896)	8502	12	38.39	-	0.31	4.05e-09	1.95e-06
cellular response to stimulus (GO:0051716)	6793	9	30.67	-	0.29	3.2e-07	9.59e-05
regulation of biological quality (GO:0065008)	4013	5	18.12	-	0.28	0.000184	0.0303
primary metabolic process (GO:0044238)	7516	9	33.94	-	0.27	6.66e-09	2.86e-06
cellular macromolecule metabolic process (GO:0044260)	5098	6	23.02	-	0.26	8.93e-06	0.00194
metabolic process (GO:0008152)	8511	10	38.43	-	0.26	1.92e-10	1.33e-07
regulation of response to stimulus (GO:0048583)	4275	5	19.3	-	0.26	5.33e-05	0.00972
signal transduction (GO:0007165)	5152	6	23.26	-	0.26	5.57e-06	0.0013
response to chemical (GO:0042221)	4392	5	19.83	-	0.25	3.45e-05	0.00643
nitrogen compound metabolic process (GO:0006807)	7032	8	31.75	-	0.25	1.55e-08	6.32e-06
organic substance metabolic process (GO:0071704)	7945	9	35.88	-	0.25	5.82e-10	3.3e-07
positive regulation of biological process (GO:0048518)	6275	7	28.34	-	0.25	1.65e-07	5.35e-05
macromolecule metabolic process (GO:0043170)	6280	7	28.36	-	0.25	1.66e-07	5.27e-05
signaling (GO:0023052)	5504	6	24.85	-	0.24	1.38e-06	0.000353
cell communication (GO:0007154)	5595	6	25.27	-	0.24	8.4e-07	0.00023
positive regulation of cellular process (GO:0048522)	5685	6	25.67	-	0.23	5.09e-07	0.000144
positive regulation of metabolic process (GO:0009893)	3852	4	17.39	-	0.23	7.98e-05	0.0139
cellular metabolic process (GO:0044237)	7716	8	34.84	-	0.23	4.13e-10	2.52e-07
positive regulation of nitrogen compound metabolic process (GO:0051173)	3202	3	14.46	-	0.21	0.000259	0.0414
regulation of metabolic process (GO:0019222)	6989	6	31.56	-	0.19	4.07e-10	2.58e-07
positive regulation of macromolecule metabolic process (GO:0010604)	3566	3	16.1	-	0.19	4.83e-05	0.00891
response to stress (GO:0006950)	3648	3	16.47	-	0.18	3.16e-05	0.00619
negative regulation of cellular process (GO:0048523)	4946	4	22.33	-	0.18	5.25e-07	0.000146
regulation of cellular metabolic process (GO:0031323)	6275	5	28.34	-	0.18	4.49e-09	2.03e-06
regulation of macromolecule metabolic process (GO:0060255)	6459	5	29.17	-	0.17	1.39e-09	7.34e-07
negative regulation of biological process (GO:0048519)	5581	4	25.2	-	0.16	2.4e-08	9.27e-06
biosynthetic process (GO:0009058)	2837	2	12.81	-	0.16	0.000221	0.0362
regulation of nitrogen compound metabolic process (GO:0051171)	5869	4	26.5	-	0.15	4.51e-09	1.99e-06
regulation of primary metabolic process (GO:0080090)	6057	4	27.35	-	0.15	1.44e-09	7.38e-07
regulation of gene expression (GO:0010468)	4864	2	21.96	-	0.09	9.91e-09	4.14e-06
negative regulation of nitrogen compound metabolic process (GO:0051172)	2447	1	11.05	-	0.09	0.000164	0.0274
regulation of transcription by RNA polymerase II (GO:0006357)	2617	1	11.82	-	0.08	0.000109	0.0185
negative regulation of cellular metabolic process (GO:0031324)	2652	1	11.98	-	0.08	6.8e-05	0.0121
nucleobase-containing compound metabolic process (GO:0006139)	2713	1	12.25	-	0.08	7.12e-05	0.0125
negative regulation of macromolecule metabolic process (GO:0010605)	2902	1	13.1	-	0.08	2.95e-05	0.00585
heterocycle metabolic process (GO:0046483)	2906	1	13.12	-	0.08	1.8e-05	0.00372
cellular aromatic compound metabolic process (GO:0006725)	2956	1	13.35	-	0.07	1.79e-05	0.00374
negative regulation of metabolic process (GO:0009892)	3149	1	14.22	-	0.07	7.2e-06	0.00165
organic cyclic compound metabolic process (GO:1901360)	3190	1	14.4	-	0.07	4.52e-06	0.00109
cellular nitrogen compound metabolic process (GO:0034641)	3373	1	15.23	-	0.07	1.76e-06	0.000437
regulation of transcription, DNA-templated (GO:0006355)	3432	1	15.5	-	0.06	1.76e-06	0.000442
regulation of nucleic acid-templated transcription (GO:1903506)	3501	1	15.81	-	0.06	1.07e-06	0.000288
regulation of RNA biosynthetic process (GO:2001141)	3506	1	15.83	-	0.06	1.07e-06	0.000283
regulation of RNA metabolic process (GO:0051252)	3779	1	17.06	-	0.06	2.45e-07	7.63e-05
regulation of cellular macromolecule biosynthetic process (GO:2000112)	3890	1	17.57	-	0.06	1.48e-07	4.91e-05
regulation of macromolecule biosynthetic process (GO:0010556)	3991	1	18.02	-	0.06	8.94e-08	3.02e-05
regulation of nucleobase-containing compound metabolic process (GO:0019219)	4050	1	18.29	-	0.05	5.4e-08	1.95e-05
regulation of cellular biosynthetic process (GO:0031326)	4150	1	18.74	-	0.05	3.2e-08	1.21e-05
regulation of biosynthetic process (GO:0009889)	4231	1	19.11	-	0.05	1.93e-08	7.66e-06
nucleic acid metabolic process (GO:0090304)	2219	0	10.02	-	< 0.01	5.84e-05	0.0105
gene expression (GO:0010467)	2088	0	9.43	-	< 0.01	8.7e-05	0.0148
