# Supplementary material for: Functionathon: a manual data mining workflow to generate functional hypotheses for uncharacterized human proteins and its application by undergraduate students
Source: Database (Oxford). 2021 Jul 28;2021:baab046. doi: 10.1093/database/baab046 (PMC8317215; doi:10.1093/database/baab046)
Supplement: baab046_Supp [file baab046_supp.zip › Table S5.xlsx]

## Sheet: Table 1 C6orf118
Query genes:							Gene Name	Entry		Analysis Type:	PANTHER Overrepresentation Test (Released 20210224)
Query Gene	Entrez ID	Coexpression Score	P-Value	Description			CCDC114	Q96M63		Annotation Version and Release Date:	GO Ontology database DOI: 10.5281/zenodo.4495804 Released 2021-02-01
C6ORF118	168090	-3.2	0.0035	chromosome 6 open reading frame 118			WDR96	Q8NDM7		Analyzed List:	Client Text Box Input (Homo sapiens)
Coexpressed genes:							CCDC164	Q96MC2		Reference List:	Homo sapiens (all genes in database)
Rank	Gene	Entrez ID	Coexpression Score	P-Value	Description		FAM81B	Q96LP2		Test Type:	FISHER
1	CCDC114	93233	2.3988	0	coiled-coil domain containing 114		ADGB	Q8N7X0		Correction:	FDR
2	WDR96	80217	2.2912	0	WD repeat domain 96		LRRC71	Q8N4P6		GO biological process complete	Homo sapiens - REFLIST (20595)	Client Text Box Input (88)	Client Text Box Input (expected)	Client Text Box Input (over/under)	Client Text Box Input (fold Enrichment)	Client Text Box Input (raw P-value)	Client Text Box Input (FDR)	Category
3	LOC254312	254312	2.2429	0	uncharacterized LOC254312		TCP11	Q8WWU5		axonemal central apparatus assembly (GO:1904158)	5	3	0.02	+	> 100	4.1e-06	0.00116	cilium assembly
4	CCDC164	92749	2.1925	0	coiled-coil domain containing 164		C9ORF116	Q5BN46		inner dynein arm assembly (GO:0036159)	16	6	0.07	+	87.76	3.52e-10	1.85e-07	cilium assembly
5	FAM81B	153643	2.1862	0	family with sequence similarity 81, member B		C4ORF22	Q6V702		outer dynein arm assembly (GO:0036158)	21	6	0.09	+	66.87	1.37e-09	6.2e-07	cilium assembly
6	ADGB	79747	2.1625	0	androglobin		DNAJB13	P59910		axonemal dynein complex assembly (GO:0070286)	36	10	0.15	+	65.01	4.13e-15	8.14e-12
7	LRRC71	149499	2.1575	0	leucine rich repeat containing 71		HMGB4	Q8WW32		epithelial cilium movement involved in determination of left/right asymmetry (GO:0060287)	11	3	0.05	+	63.83	2.62e-05	0.00607	cilium movement
8	TCP11	6954	2.1412	0	t-complex 11 homolog (mouse)		DNAH9	Q9NYC9		sperm chromatin condensation (GO:0035092)	13	3	0.06	+	54.01	4e-05	0.00877	spermatogenesis
9	C9ORF116	138162	2.1288	0.0006	chromosome 9 open reading frame 116		AKAP14	Q86UN6		regulation of cilium beat frequency (GO:0003356)	14	3	0.06	+	50.15	4.85e-05	0.0102	cilium movement
10	C4ORF22	255119	2.1063	0	chromosome 4 open reading frame 22		FAM71A	Q8IYT1		axoneme assembly (GO:0035082)	78	15	0.33	+	45.01	4.64e-20	2.44e-16
11	DNAJB13	374407	2.0957	0	DnaJ (Hsp40) homolog, subfamily B, member 13		IQCD	Q96DY2		epithelial cilium movement involved in extracellular fluid movement (GO:0003351)	34	6	0.15	+	41.3	1.71e-08	6.9e-06
12	HMGB4	127540	2.0912	0	high mobility group box 4		TTC23L	Q6PF05		extracellular transport (GO:0006858)	37	6	0.16	+	37.95	2.68e-08	1.06e-05
13	DNAH9	1770	2.09	0.0004	dynein, axonemal, heavy chain 9		CCDC37	Q494V2		motile cilium assembly (GO:0044458)	25	4	0.11	+	37.45	6.7e-06	0.00179	cilium assembly
14	AKAP14	158798	2.0887	0.0002	A kinase (PRKA) anchor protein 14		FKBP6	O75344		cilium movement (GO:0003341)	144	23	0.62	+	37.38	8.49e-29	1.34e-24
15	FAM71A	149647	2.0875	0.0005	family with sequence similarity 71, member A		PRR19	A6NJB7		spermatid nucleus differentiation (GO:0007289)	20	3	0.09	+	35.11	0.000124	0.0236
16	IQCD	115811	2.085	0.0001	IQ motif containing D		CILP2	Q8IUL8		microtubule bundle formation (GO:0001578)	109	15	0.47	+	32.21	4.27e-18	1.35e-14
17	TTC23L	153657	2.0775	0.0001	tetratricopeptide repeat domain 23-like		DNAAF1	Q8NEP3		regulation of cilium movement (GO:0003352)	38	5	0.16	+	30.79	1.05e-06	0.000346
18	CCDC37	348807	2.0575	0.0001	coiled-coil domain containing 37		SPAG8	Q99932		cilium movement involved in cell motility (GO:0060294)	98	11	0.42	+	26.27	1.19e-12	1.1e-09
19	FKBP6	8468	2.055	0.0006	FK506 binding protein 6, 36kDa		DLEC1	Q9Y238		sperm motility (GO:0097722)	90	10	0.38	+	26	1.46e-11	1.15e-08
20	LOC643037	643037	2.0475	0.0001	uncharacterized LOC643037		C14ORF166B	Q0VAA2		flagellated sperm motility (GO:0030317)	90	10	0.38	+	26	1.46e-11	1.09e-08	cilium movement
21	PRR19	284338	2.0443	0.0002	proline rich 19		TTC16	Q8NEE8		cilium-dependent cell motility (GO:0060285)	111	12	0.47	+	25.3	1.59e-13	1.93e-10
22	CILP2	148113	2.0325	0.0005	cartilage intermediate layer protein 2		C2ORF73	Q8N5S3		cilium or flagellum-dependent cell motility (GO:0001539)	111	12	0.47	+	25.3	1.59e-13	1.79e-10
23	DNAAF1	123872	2.0287	0.0002	dynein, axonemal, assembly factor 1		PLAC1L	Q86WS3		regulation of microtubule-based movement (GO:0060632)	54	5	0.23	+	21.67	5.19e-06	0.00141
24	SPAG8	26206	2.0275	0.0007	sperm associated antigen 8		EFCAB6	Q5THR3		spermatid development (GO:0007286)	155	13	0.66	+	19.63	2.97e-13	3.12e-10
25	DLEC1	9940	2.0262	0.0067	deleted in lung and esophageal cancer 1		C11ORF20	Q9NTU4		spermatid differentiation (GO:0048515)	161	13	0.69	+	18.9	4.67e-13	4.6e-10
26	C14ORF166B	145497	2.02	0.0002	chromosome 14 open reading frame 166B		CCDC19	Q9UL16		microtubule-based movement (GO:0007018)	350	24	1.5	+	16.05	5.87e-22	4.63e-18
27	TTC16	158248	2.0187	0.0001	tetratricopeptide repeat domain 16		C17ORF64	Q86WR6		determination of left/right symmetry (GO:0007368)	122	7	0.52	+	13.43	1.3e-06	0.00041
28	C2ORF73	129852	2.0187	0.0001	chromosome 2 open reading frame 73		CCDC40	Q4G0X9		determination of bilateral symmetry (GO:0009855)	127	7	0.54	+	12.9	1.68e-06	0.000519
29	PLAC1L	219990	2.0062	0	placenta-specific 1-like		C20ORF173	Q96LM9		cilium organization (GO:0044782)	402	22	1.72	+	12.81	3.68e-18	1.45e-14
30	EFCAB6	64800	2.005	0.0003	EF-hand calcium binding domain 6		YSK4	Q56UN5		specification of symmetry (GO:0009799)	128	7	0.55	+	12.8	1.77e-06	0.000525
31	C11ORF20	25858	1.995	0.0016	chromosome 11 open reading frame 20		TMEM239	Q8WW34		cilium assembly (GO:0060271)	378	20	1.62	+	12.38	2.8e-16	6.31e-13
32	CCDC19	25790	1.9825	0	coiled-coil domain containing 19		WDR69	Q8N136		germ cell development (GO:0007281)	257	13	1.1	+	11.84	1.2e-10	7.03e-08
33	C17ORF64	124773	1.97	0	chromosome 17 open reading frame 64		PPP1R32	Q7Z5V6		plasma membrane bounded cell projection assembly (GO:0120031)	469	20	2	+	9.98	1.41e-14	2.47e-11
34	CCDC40	55036	1.965	0.0007	coiled-coil domain containing 40		TEKT2	Q9UIF3		microtubule-based transport (GO:0099111)	191	8	0.82	+	9.8	2.12e-06	0.00062
35	C20ORF173	140873	1.9629	0.0004	chromosome 20 open reading frame 173		MORN5	Q5VZ52		cell projection assembly (GO:0030031)	485	20	2.07	+	9.65	2.58e-14	3.71e-11
36	YSK4	80122	1.9612	0.0002	YSK4 Sps1/Ste20-related kinase homolog (S. cerevisiae)		PRND	Q9UKY0		cellular process involved in reproduction in multicellular organism (GO:0022412)	353	14	1.51	+	9.28	4.7e-10	2.39e-07
37	TMEM239	100288797	1.96	0.007	transmembrane protein 239		CCDC135	Q8IY82		spermatogenesis (GO:0007283)	548	21	2.34	+	8.97	2.11e-14	3.32e-11
38	WDR69	164781	1.9562	0.0001	WD repeat domain 69		ZMYND10	O75800		male gamete generation (GO:0048232)	567	21	2.42	+	8.67	4e-14	5.26e-11
39	DKFZP434L192	222029	1.9525	0	uncharacterized protein DKFZp434L192		ZBBX	A8MT70		microtubule-based process (GO:0007017)	803	27	3.43	+	7.87	4.26e-17	1.12e-13
40	PPP1R32	220004	1.9512	0.0001	protein phosphatase 1, regulatory subunit 32		ARMC3	Q5W041		gamete generation (GO:0007276)	694	21	2.97	+	7.08	1.73e-12	1.52e-09
41	TEKT2	27285	1.9475	0	tektin 2 (testicular)		WBSCR28	Q6UE05		microtubule cytoskeleton organization (GO:0000226)	566	16	2.42	+	6.62	2.8e-09	1.23e-06
42	MORN5	254956	1.9438	0.0007	MORN repeat containing 5		CCER1	Q8TC90		sexual reproduction (GO:0019953)	842	22	3.6	+	6.11	7.78e-12	6.46e-09
43	PRND	23627	1.94	0.0003	prion protein 2 (dublet)		RNASE11	Q8TAA1		organelle assembly (GO:0070925)	781	20	3.34	+	5.99	1.17e-10	7.08e-08
44	CCDC135	84229	1.9325	0	coiled-coil domain containing 135		DNAI2	Q9GZS0		multicellular organismal reproductive process (GO:0048609)	822	21	3.51	+	5.98	3.83e-11	2.52e-08
45	ZMYND10	51364	1.9312	0.0026	zinc finger, MYND-type containing 10		ZNF474	Q6S9Z5		multicellular organism reproduction (GO:0032504)	841	21	3.59	+	5.84	5.78e-11	3.65e-08
46	ZBBX	79740	1.93	0.0002	zinc finger, B-box domain containing		TSNAXIP1	Q2TAA8		multi-organism reproductive process (GO:0044703)	999	22	4.27	+	5.15	1.94e-10	1.09e-07
47	ARMC3	219681	1.93	0.0004	armadillo repeat containing 3		SPATA4	Q8NEY3		developmental process involved in reproduction (GO:0003006)	956	21	4.08	+	5.14	5.71e-10	2.81e-07
48	WBSCR28	135886	1.9288	0	Williams-Beuren syndrome chromosome region 28		TSSK6	Q9BXA6		multi-organism process (GO:0051704)	1067	22	4.56	+	4.83	6.54e-10	3.13e-07
49	CCER1	196477	1.925	0.0001	coiled-coil glutamate-rich protein 1		DYDC1	Q8WWB3		cell projection organization (GO:0030030)	1212	23	5.18	+	4.44	1.19e-09	5.51e-07
50	RNASE11	122651	1.9238	0	ribonuclease, RNase A family, 11 (non-active)		PIWIL1	Q96J94		plasma membrane bounded cell projection organization (GO:0120036)	1166	22	4.98	+	4.42	3.29e-09	1.4e-06
51	DNAI2	64446	1.9225	0.0008	dynein, axonemal, intermediate chain 2		TEKT1	Q969V4		reproductive process (GO:0022414)	1432	27	6.12	+	4.41	3.21e-11	2.3e-08
52	ADAM3A	1587	1.9171	0	ADAM metallopeptidase domain 3A (pseudogene)		FAM71B	Q8TC56		reproduction (GO:0000003)	1435	27	6.13	+	4.4	3.36e-11	2.31e-08
53	ZNF474	133923	1.9129	0.0006	zinc finger protein 474		PIH1D3	Q9NQM4		movement of cell or subcellular component (GO:0006928)	1591	25	6.8	+	3.68	8.46e-09	3.51e-06
54	TSNAXIP1	55815	1.9125	0.0011	translin-associated factor X interacting protein 1		RFX2	P48378		cytoskeleton organization (GO:0007010)	1204	16	5.14	+	3.11	5.02e-05	0.0104
55	SPATA4	132851	1.9125	0.0008	spermatogenesis associated 4		SPEF1	Q9Y4P9		Unclassified (UNCLASSIFIED)	2745	30	11.73	+	2.56	6.17e-07	0.000212
56	TSSK6	83983	1.9075	0.0024	testis-specific serine kinase 6		PP2D1	A8MPX8		cellular component assembly (GO:0022607)	2438	25	10.42	+	2.4	3.65e-05	0.00812
57	DYDC1	143241	1.905	0.0001	DPY30 domain containing 1		TSSK4	Q6SA08		cellular component biogenesis (GO:0044085)	2701	25	11.54	+	2.17	0.000178	0.0319
58	PIWIL1	9271	1.9025	0.0001	piwi-like 1 (Drosophila)		TSSK2	Q96PF2		organelle organization (GO:0006996)	3574	30	15.27	+	1.96	0.000178	0.0322
59	TEKT1	83659	1.8987	0.0003	tektin 1		VWA3B	Q502W6		biological_process (GO:0008150)	17850	58	76.27	-	0.76	6.17e-07	0.000207
60	FAM71B	153745	1.8963	0.0007	family with sequence similarity 71, member B		CCDC11	Q96M91		biological regulation (GO:0065007)	12571	29	53.71	-	0.54	1.32e-07	4.84e-05
61	PIH1D3	139212	1.8963	0.0001	PIH1 domain containing 3		KLHL10	Q6JEL2		regulation of biological process (GO:0050789)	11856	26	50.66	-	0.51	1.86e-07	6.65e-05
62	RFX2	5990	1.8937	0.0003	regulatory factor X, 2 (influences HLA class II expression)		SPAG17	Q6Q759		cellular metabolic process (GO:0044237)	7570	16	32.35	-	0.49	0.000215	0.0381
63	SPEF1	25876	1.8913	0.0066	sperm flagellar 1		C10ORF40	A4QN01		metabolic process (GO:0008152)	8333	17	35.61	-	0.48	2.91e-05	0.00664
64	LOC100128993	100128993	1.885	0	uncharacterized LOC100128993		ZCCHC13	Q8WW36		regulation of cellular process (GO:0050794)	11302	23	48.29	-	0.48	6.64e-08	2.49e-05
65	LOC285740	285740	1.8814	0.0024	uncharacterized LOC285740		RSPH3	Q86UC2		organic substance metabolic process (GO:0071704)	7878	16	33.66	-	0.48	6.21e-05	0.0127
66	PP2D1	151649	1.88	0	protein phosphatase 2C-like domain containing 1		PPP1R2P9	O14990		regulation of macromolecule metabolic process (GO:0060255)	6301	11	26.92	-	0.41	0.000106	0.0203
67	TSSK4	283629	1.8763	0	testis-specific serine kinase 4		PGK2	P07205		regulation of metabolic process (GO:0019222)	6847	11	29.26	-	0.38	1.18e-05	0.00311
68	TSSK2	23617	1.8737	0.0003	testis-specific serine kinase 2		SYCE3	A1L190		regulation of nitrogen compound metabolic process (GO:0051171)	5688	9	24.3	-	0.37	0.000105	0.0204
69	VWA3B	200403	1.8725	0.001	von Willebrand factor A domain containing 3B		C12ORF55	Q96N23		regulation of primary metabolic process (GO:0080090)	5892	9	25.18	-	0.36	4.51e-05	0.00962
70	CCDC11	220136	1.8713	0.0005	coiled-coil domain containing 11		TTC29	Q8NA56		regulation of cellular metabolic process (GO:0031323)	6106	9	26.09	-	0.34	1.87e-05	0.00455
71	KLHL10	317719	1.8687	0	kelch-like 10 (Drosophila)		MORN3	Q6PF18		cellular response to stimulus (GO:0051716)	6770	9	28.93	-	0.31	1.07e-06	0.000345
72	SPAG17	200162	1.8675	0	sperm associated antigen 17		C1ORF158	Q8N1D5		negative regulation of biological process (GO:0048519)	5541	7	23.68	-	0.3	1.63e-05	0.00414
73	C10ORF40	283025	1.8643	0	chromosome 10 open reading frame 40		TEX26	Q8N6G2		signal transduction (GO:0007165)	5138	6	21.95	-	0.27	1.81e-05	0.00446
74	ZCCHC13	389874	1.8625	0	zinc finger, CCHC domain containing 13		TSSK1B	Q9BXA7		positive regulation of biological process (GO:0048518)	6244	7	26.68	-	0.26	5.7e-07	0.0002
75	LINC00326	285735	1.86	0	long intergenic non-protein coding RNA 326		PRM2	P04554		signaling (GO:0023052)	5485	6	23.44	-	0.26	4.53e-06	0.00125
76	RSPH3	83861	1.8587	0.0014	radial spoke 3 homolog (Chlamydomonas)		TPPP2	P59282		cell communication (GO:0007154)	5572	6	23.81	-	0.25	2.8e-06	0.000803
77	PPP1R2P9	80316	1.855	0.001	protein phosphatase 1, regulatory (inhibitor) subunit 2 pseudogene 9		FAM71F1	Q96KD3		positive regulation of cellular process (GO:0048522)	5656	6	24.17	-	0.25	1.74e-06	0.000528
78	PGK2	5232	1.855	0	phosphoglycerate kinase 2		C17ORF105	B2RV13		response to stimulus (GO:0050896)	8496	9	36.3	-	0.25	2.47e-10	1.35e-07
79	SYCE3	644186	1.85	0.0003	synaptonemal complex central element protein 3		DYNLRB2	Q8TF09		negative regulation of cellular process (GO:0048523)	4909	5	20.98	-	0.24	1.23e-05	0.00319
80	C12ORF55	144535	1.8457	0.0001	chromosome 12 open reading frame 55		CCDC70	Q6NSX1		regulation of response to stimulus (GO:0048583)	4240	4	18.12	-	0.22	3.06e-05	0.0069
81	CSTT	164380	1.8438	0.0003	cystatin pseudogene		C16ORF71	Q8IYS4		regulation of cell communication (GO:0010646)	3424	3	14.63	-	0.21	0.000243	0.0426
82	TTC29	83894	1.8425	0.0001	tetratricopeptide repeat domain 29		TMEM190	Q8WZ59		positive regulation of macromolecule metabolic process (GO:0010604)	3431	3	14.66	-	0.2	0.000244	0.0423
83	MORN3	283385	1.8412	0	MORN repeat containing 3		PRKACG	P22612		regulation of signaling (GO:0023051)	3459	3	14.78	-	0.2	0.00016	0.0294
84	C1ORF158	93190	1.835	0.0013	chromosome 1 open reading frame 158		TTC21A	Q8NDW8		positive regulation of metabolic process (GO:0009893)	3719	3	15.89	-	0.19	6.74e-05	0.0136
85	TEX26	122046	1.835	0.0001	testis expressed 26		LINC00301	Q8NCQ3		regulation of biological quality (GO:0065008)	4007	3	17.12	-	0.18	1.77e-05	0.00443
86	TSSK1B	83942	1.8338	0	testis-specific serine kinase 1B		SYCP1	Q15431		regulation of multicellular organismal process (GO:0051239)	2647	1	11.31	-	0.09	0.000155	0.0288
87	PRM2	5620	1.8338	0.0002	protamine 2					cellular biosynthetic process (GO:0044249)	2709	1	11.58	-	0.09	9.91e-05	0.0195
88	DBIL5P	100131454	1.8338	0.0003	diazepam binding inhibitor-like 5, pseudogene					cellular response to chemical stimulus (GO:0070887)	2898	1	12.38	-	0.08	4.07e-05	0.0088
89	TPPP2	122664	1.8325	0.0003	tubulin polymerization-promoting protein family member 2					response to organic substance (GO:0010033)	2995	1	12.8	-	0.08	2.59e-05	0.00609
90	FAM71F1	84691	1.8312	0	family with sequence similarity 71, member F1					response to chemical (GO:0042221)	4369	1	18.67	-	0.05	4.46e-08	1.72e-05
91	C17ORF105	284067	1.83	0.0001	chromosome 17 open reading frame 105					biological process involved in interspecies interaction between organisms (GO:0044419)	2118	0	9.05	-	< 0.01	0.00013	0.0245
92	DYNLRB2	83657	1.8275	0.0005	dynein, light chain, roadblock-type 2					response to external stimulus (GO:0009605)	2508	0	10.72	-	< 0.01	2.12e-05	0.00506
93	CCDC70	83446	1.825	0.0038	coiled-coil domain containing 70					gene expression (GO:0010467)	2186	0	9.34	-	< 0.01	8.3e-05	0.0166
94	C16ORF71	146562	1.825	0.0021	chromosome 16 open reading frame 71
95	TMEM190	147744	1.8238	0.0017	transmembrane protein 190
96	PRKACG	5568	1.8175	0.0038	protein kinase, cAMP-dependent, catalytic, gamma
97	LOC126536	126536	1.8125	0.0007	uncharacterized LOC126536
98	TTC21A	199223	1.81	0.0025	tetratricopeptide repeat domain 21A
99	LINC00301	283197	1.8086	0.0012	long intergenic non-protein coding RNA 301
100	SYCP1	6847	1.8062	0.0003	synaptonemal complex protein 1

## Sheet: Table 2 C7orf25
Query genes:
Query Gene	Entrez ID	Coexpression Score	P-Value	Description
C7ORF25	79020	-3.2	0	chromosome 7 open reading frame 25
Coexpressed genes:
Rank	Gene	Entrez ID	Coexpression Score	P-Value	Description
1	ZCRB1	85437	1.9162	0	zinc finger CCHC-type and RNA binding motif 1
2	THAP5	168451	1.8937	0	THAP domain containing 5
3	CGRRF1	10668	1.8533	0.0002	cell growth regulator with ring finger domain 1
4	JKAMP	51528	1.8212	0.0025	JNK1/MAPK8-associated membrane protein
5	LMLN	89782	1.8038	0.0001	leishmanolysin-like (metallopeptidase M8 family)
6	ZFP112	7771	1.7933	0	zinc finger protein 112 homolog (mouse)
7	TTC30A	92104	1.7725	0	tetratricopeptide repeat domain 30A
8	ZNF260	339324	1.7686	0.0153	zinc finger protein 260
9	VPS37A	137492	1.7625	0.0016	vacuolar protein sorting 37 homolog A (S. cerevisiae)
10	PHAX	51808	1.755	0.0019	phosphorylated adaptor for RNA export
11	ZNF571	51276	1.75	0.0005	zinc finger protein 571
12	AGGF1	55109	1.7225	0.0003	angiogenic factor with G patch and FHA domains 1
13	TCEAL4	79921	1.7208	0.0007	transcription elongation factor A (SII)-like 4
14	CCDC90B	60492	1.7158	0.001	coiled-coil domain containing 90B
15	MED7	9443	1.7117	0.0001	mediator complex subunit 7
16	FAM173B	134145	1.7025	0.0003	family with sequence similarity 173, member B
17	RPS6KC1	26750	1.7017	0.0001	ribosomal protein S6 kinase, 52kDa, polypeptide 1
18	SOCS4	122809	1.6912	0.0025	suppressor of cytokine signaling 4
19	HSPA13	6782	1.6908	0.0078	heat shock protein 70kDa family, member 13
20	HLTF	6596	1.6883	0.0036	helicase-like transcription factor
21	DCUN1D4	23142	1.6767	0.0008	DCN1, defective in cullin neddylation 1, domain containing 4 (S. cerevisiae)
22	C8ORF37	157657	1.6683	0.0001	chromosome 8 open reading frame 37
23	POLK	51426	1.6575	0.0057	polymerase (DNA directed) kappa
24	UBQLN1	29979	1.6437	0.0052	ubiquilin 1
25	DHX36	170506	1.6425	0.0044	DEAH (Asp-Glu-Ala-His) box polypeptide 36
26	C5ORF44	80006	1.6367	0.0078	chromosome 5 open reading frame 44
27	ATP6V1D	51382	1.6333	0.0059	ATPase, H+ transporting, lysosomal 34kDa, V1 subunit D
28	LOC257396	257396	1.6333	0	uncharacterized LOC257396
29	IMPACT	55364	1.6225	0.0005	Impact homolog (mouse)
30	LMBRD2	92255	1.6213	0.001	LMBR1 domain containing 2
31	BCAP29	55973	1.6183	0.0003	B-cell receptor-associated protein 29
32	FAM200A	221786	1.6175	0.0016	family with sequence similarity 200, member A
33	SNAPC1	6617	1.6075	0.0001	small nuclear RNA activating complex, polypeptide 1, 43kDa
34	C5ORF54	63920	1.5992	0.0016	chromosome 5 open reading frame 54
35	BBS9	27241	1.5992	0.0019	Bardet-Biedl syndrome 9
36	EXOC5	10640	1.5967	0.0163	exocyst complex component 5
37	THUMPD3	25917	1.5912	0.0077	THUMP domain containing 3
38	PLEKHA3	65977	1.59	0.0032	pleckstrin homology domain containing, family A (phosphoinositide binding specific) member 3
39	PNPLA8	50640	1.59	0.0129	patatin-like phospholipase domain containing 8
40	APPBP2	10513	1.5867	0.017	amyloid beta precursor protein (cytoplasmic tail) binding protein 2
41	ZC3H14	79882	1.5858	0.0082	zinc finger CCCH-type containing 14
42	HDGFRP3	50810	1.5717	0.0007	hepatoma-derived growth factor, related protein 3
43	STAM2	10254	1.5708	0.0115	signal transducing adaptor molecule (SH3 domain and ITAM motif) 2
44	FAM220A	84792	1.57	0.0016	family with sequence similarity 220, member A
45	FAM179B	23116	1.5683	0.0187	family with sequence similarity 179, member B
46	SLC35A5	55032	1.5658	0.0254	solute carrier family 35, member A5
47	THAP10	56906	1.5617	0.0007	THAP domain containing 10
48	FAM200B	285550	1.5612	0.0009	family with sequence similarity 200, member B
49	PIGK	10026	1.56	0.0174	phosphatidylinositol glycan anchor biosynthesis, class K
50	CPSF2	53981	1.5525	0.0181	cleavage and polyadenylation specific factor 2, 100kDa
51	ZNF302	55900	1.5475	0.0101	zinc finger protein 302
52	LOC100287896	100287896	1.5471	0.0053	uncharacterized LOC100287896
53	TIGD7	91151	1.5438	0.0001	tigger transposable element derived 7
54	RNF14	9604	1.54	0.0084	ring finger protein 14
55	GLT8D1	55830	1.5383	0.0218	glycosyltransferase 8 domain containing 1
56	TM2D1	83941	1.5367	0.0113	TM2 domain containing 1
57	TMEM126A	84233	1.535	0.0135	transmembrane protein 126A
58	PIGX	54965	1.5325	0.0008	phosphatidylinositol glycan anchor biosynthesis, class X
59	ZBTB41	360023	1.5313	0.0264	zinc finger and BTB domain containing 41
60	SPATA7	55812	1.53	0.0047	spermatogenesis associated 7
61	WDR5B	54554	1.5208	0.0019	WD repeat domain 5B
62	IFT81	28981	1.5208	0.0018	intraflagellar transport 81 homolog (Chlamydomonas)
63	SCRN3	79634	1.5133	0.0043	secernin 3
64	PTCD2	79810	1.51	0.0038	pentatricopeptide repeat domain 2
65	KLHL7	55975	1.51	0.003	kelch-like 7 (Drosophila)
66	TSEN15	116461	1.51	0.0027	tRNA splicing endonuclease 15 homolog (S. cerevisiae)
67	MSANTD3	91283	1.5075	0.0005	Myb/SANT-like DNA-binding domain containing 3
68	ZFYVE16	9765	1.5017	0.0178	zinc finger, FYVE domain containing 16
69	ANKIB1	54467	1.4963	0.0194	ankyrin repeat and IBR domain containing 1
70	WDR53	348793	1.495	0.0007	WD repeat domain 53
71	TAX1BP1	8887	1.4942	0.0121	Tax1 (human T-cell leukemia virus type I) binding protein 1
72	NME7	29922	1.4942	0.0025	NME/NM23 family member 7
73	YAE1D1	57002	1.4937	0.0087	Yae1 domain containing 1
74	SENP5	205564	1.4933	0.0024	SUMO1/sentrin specific peptidase 5
75	MRPL47	57129	1.4925	0.022	mitochondrial ribosomal protein L47
76	BBS10	79738	1.4917	0.0156	Bardet-Biedl syndrome 10
77	FAM190B	54462	1.4875	0.0077	family with sequence similarity 190, member B
78	TRIM23	373	1.4842	0.0137	tripartite motif containing 23
79	CLGN	1047	1.4842	0.0001	calmegin
80	BCAS2	10286	1.4817	0.0088	breast carcinoma amplified sequence 2
81	UBLCP1	134510	1.4787	0.0087	ubiquitin-like domain containing CTD phosphatase 1
82	ARL6	84100	1.4775	0.0003	ADP-ribosylation factor-like 6
83	C9ORF85	138241	1.4775	0.0012	chromosome 9 open reading frame 85
84	DCUN1D1	54165	1.4763	0.0046	DCN1, defective in cullin neddylation 1, domain containing 1 (S. cerevisiae)
85	TPST1	8460	1.4733	0.0008	tyrosylprotein sulfotransferase 1
86	THAP1	55145	1.4733	0.0045	THAP domain containing, apoptosis associated protein 1
87	CEP63	80254	1.4708	0.0017	centrosomal protein 63kDa
88	FKTN	2218	1.4708	0.0033	fukutin
89	ZNF226	7769	1.47	0.0041	zinc finger protein 226
90	HCFC2	29915	1.4692	0.0099	host cell factor C2
91	NKIRAS1	28512	1.4688	0.0038	NFKB inhibitor interacting Ras-like 1
92	ZFP1	162239	1.4675	0.0073	zinc finger protein 1 homolog (mouse)
93	GOLGA5	9950	1.4658	0.0206	golgin A5
94	EIF2AK4	440275	1.465	0.0049	eukaryotic translation initiation factor 2 alpha kinase 4
95	EBNA1BP2	10969	1.465	0.0371	EBNA1 binding protein 2
96	PCNXL4	64430	1.4608	0.0446	pecanex-like 4 (Drosophila)
97	ARL13B	200894	1.46	0.0106	ADP-ribosylation factor-like 13B
98	ERGIC2	51290	1.4583	0.0071	ERGIC and golgi 2
99	FAM174A	345757	1.455	0.009	family with sequence similarity 174, member A
100	C2ORF69	205327	1.4488	0.0089	chromosome 2 open reading frame 69

## Sheet: Table 3 Cxorf58
Query genes:							Gene Name	Entry		Analysis Type:	PANTHER Overrepresentation Test (Released 20210224)
Query Gene	Entrez ID	Coexpression Score	P-Value	Description			TTLL13	A6NNM8		Annotation Version and Release Date:	GO Ontology database DOI: 10.5281/zenodo.4495804 Released 2021-02-01
CXORF58	254158	-3.2	0.0028	chromosome X open reading frame 58			EFCAB5	A4FU69		Analyzed List:	Client Text Box Input (Homo sapiens)
Coexpressed genes:							CCDC168	Q8NDH2		Reference List:	Homo sapiens (all genes in database)
Rank	Gene	Entrez ID	Coexpression Score	P-Value	Description		TMPRSS12	Q86WS5		Test Type:	FISHER
1	LINC00293	497634	2.7914	0	long intergenic non-protein coding RNA 293		FAM205B	Q63HN1		Correction:	FDR
2	LOC254312	254312	2.7671	0	uncharacterized LOC254312		OPN5	Q6U736		GO biological process complete	Homo sapiens - REFLIST (20595)	Client Text Box Input (74)	Client Text Box Input (expected)	Client Text Box Input (over/under)	Client Text Box Input (fold Enrichment)	Client Text Box Input (raw P-value)	Client Text Box Input (FDR)
3	TTLL13	440307	2.7586	0	tubulin tyrosine ligase-like family, member 13		SLC26A8	Q96RN1		sperm motility (GO:0097722)	90	5	0.32	+	15.46	2.31e-05	0.00935
4	EFCAB5	374786	2.7243	0.0002	EF-hand calcium binding domain 5		TMEM225	Q6GV28		flagellated sperm motility (GO:0030317)	90	5	0.32	+	15.46	2.31e-05	0.00912
5	CCDC168	643677	2.6471	0.0001	coiled-coil domain containing 168		KCNU1	A8MYU2		cilium-dependent cell motility (GO:0060285)	111	6	0.4	+	15.04	3.91e-06	0.00257
6	PWRN1	791114	2.6357	0	Prader-Willi region non-protein coding RNA 1		LINC00301	Q8NCQ3		cilium or flagellum-dependent cell motility (GO:0001539)	111	6	0.4	+	15.04	3.91e-06	0.00247
7	TMPRSS12	283471	2.6288	0	transmembrane (C-terminal) protease, serine 12		ASB17	Q8WXJ9		cilium movement involved in cell motility (GO:0060294)	98	5	0.35	+	14.2	3.42e-05	0.0117
8	FAM205B	389715	2.6257	0.0003	transmembrane protein C9orf144B pseudogene		SIGLECL1	Q8N7X8		single fertilization (GO:0007338)	151	7	0.54	+	12.9	1.56e-06	0.00112
9	OPN5	221391	2.6	0.0004	opsin 5		ODF4	Q2M2E3		fertilization (GO:0009566)	186	8	0.67	+	11.97	4.63e-07	0.000365
10	LOC100144604	100144604	2.5914	0	uncharacterized LOC100144604		LUZP4	Q9P127		cilium movement (GO:0003341)	144	6	0.52	+	11.6	1.63e-05	0.00714
11	LSAMP-AS3	285194	2.5714	0	LSAMP antisense RNA 3 (non-protein coding)		PKDREJ	Q9NTG1		microtubule-based movement (GO:0007018)	350	8	1.26	+	6.36	4.17e-05	0.0134
12	SLC26A8	116369	2.5638	0	solute carrier family 26, member 8		SRRM5	B3KS81		sexual reproduction (GO:0019953)	842	17	3.03	+	5.62	6.95e-09	2.74e-05
13	TMEM225	338661	2.5438	0	transmembrane protein 225		ADAM29	Q9UKF5		spermatogenesis (GO:0007283)	548	11	1.97	+	5.59	4.59e-06	0.00268
14	KCNU1	157855	2.5343	0	potassium channel, subfamily U, member 1		NAA11	Q9BSU3		male gamete generation (GO:0048232)	567	11	2.04	+	5.4	6.3e-06	0.00355
15	LINC00301	283197	2.5286	0.0001	long intergenic non-protein coding RNA 301		C20ORF173	Q96LM9		multi-organism reproductive process (GO:0044703)	999	17	3.59	+	4.74	8.09e-08	9.12e-05
16	ASB17	127247	2.5162	0	ankyrin repeat and SOCS box containing 17		BOLL	Q8N9W6		multi-organism process (GO:0051704)	1067	17	3.83	+	4.43	2.04e-07	0.000189
17	SIGLECL1	284369	2.5138	0	SIGLEC family like 1		DNAH8	Q96JB1		gamete generation (GO:0007276)	694	11	2.49	+	4.41	3.98e-05	0.0133
18	ODF4	146852	2.5113	0	outer dense fiber of sperm tails 4		WDR88	Q6ZMY6		multicellular organism reproduction (GO:0032504)	841	13	3.02	+	4.3	9.46e-06	0.00481
19	LUZP4	51213	2.5	0.0033	leucine zipper protein 4		PRM1	P04553		reproductive process (GO:0022414)	1432	20	5.15	+	3.89	1.13e-07	0.000119
20	PKDREJ	10343	2.5	0	polycystic kidney disease (polycystin) and REJ homolog (sperm receptor for egg jelly homolog, sea urchin)		SPAM1	P38567		reproduction (GO:0000003)	1435	20	5.16	+	3.88	1.17e-07	0.000115
21	SRRM5	100170229	2.4986	0	serine/arginine repetitive matrix 5		LDHAL6B	Q9BYZ2		microtubule-based process (GO:0007017)	803	11	2.89	+	3.81	0.000143	0.0383
22	ADAM29	11086	2.4825	0	ADAM metallopeptidase domain 29		C1ORF227	Q537H7		multicellular organismal reproductive process (GO:0048609)	822	11	2.95	+	3.72	0.000175	0.0453
23	NAA11	84779	2.475	0.0002	N(alpha)-acetyltransferase 11, NatA catalytic subunit		SPATA8	Q6RVD6		Unclassified (UNCLASSIFIED)	2745	29	9.86	+	2.94	2.92e-08	4.19e-05
24	C20ORF173	140873	2.47	0.0004	chromosome 20 open reading frame 173		PDZD9	Q8IXQ8		biological_process (GO:0008150)	17850	45	64.14	-	0.7	2.92e-08	4.61e-05
25	BOLL	66037	2.4688	0	bol, boule-like (Drosophila)		SLC25A2	Q9BXI2		cellular process (GO:0009987)	15487	38	55.65	-	0.68	9.99e-06	0.00492
26	DNAH8	1769	2.4688	0	dynein, axonemal, heavy chain 8		EXD1	Q8NHP7		cellular metabolic process (GO:0044237)	7570	12	27.2	-	0.44	0.000147	0.0387
27	WDR88	126248	2.4613	0	WD repeat domain 88		C16ORF78	Q8WTQ4		regulation of biological process (GO:0050789)	11856	16	42.6	-	0.38	3.83e-10	3.02e-06
28	MRVI1-AS1	100129827	2.4571	0.0114	MRVI1 antisense RNA 1 (non-protein coding)		HORMAD2	Q8N7B1		cellular response to stimulus (GO:0051716)	6770	9	24.33	-	0.37	5.74e-05	0.0171
29	PRM1	5619	2.4475	0.0004	protamine 1		MS4A5	Q9H3V2		regulation of cellular process (GO:0050794)	11302	15	40.61	-	0.37	2.2e-09	1.16e-05
30	SPAM1	6677	2.4425	0.0003	sperm adhesion molecule 1 (PH-20 hyaluronidase, zona pellucida binding)		ACTRT2	Q8TDY3		biological regulation (GO:0065007)	12571	16	45.17	-	0.35	7.91e-12	1.25e-07
31	LDHAL6B	92483	2.4388	0	lactate dehydrogenase A-like 6B		CETN1	Q12798		response to stimulus (GO:0050896)	8496	10	30.53	-	0.33	3.28e-07	0.000272
32	C1ORF227	149643	2.4343	0	chromosome 1 open reading frame 227		ZNF645	Q8N7E2		signaling (GO:0023052)	5485	6	19.71	-	0.3	0.000102	0.0292
33	SPATA8	145946	2.4337	0	spermatogenesis associated 8		LIPJ	Q5W064		cell communication (GO:0007154)	5572	6	20.02	-	0.3	0.000102	0.0288
34	PDZD9	255762	2.43	0	PDZ domain containing 9		C3ORF30	Q96M34		negative regulation of biological process (GO:0048519)	5541	4	19.91	-	0.2	4.19e-06	0.00254
35	SLC25A2	83884	2.425	0	solute carrier family 25 (mitochondrial carrier; ornithine transporter) member 2		HSF5	Q4G112		regulation of gene expression (GO:0010468)	4872	3	17.51	-	0.17	7.04e-06	0.0037
36	EXD1	161829	2.4113	0	exonuclease 3'-5' domain containing 1		FSCN3	Q9NQT6		negative regulation of cellular process (GO:0048523)	4909	3	17.64	-	0.17	6.85e-06	0.00373
37	C16ORF78	123970	2.4075	0.0002	chromosome 16 open reading frame 78		IQCF3	P0C7M6		regulation of metabolic process (GO:0019222)	6847	4	24.6	-	0.16	1.44e-08	3.79e-05
38	HORMAD2	150280	2.4063	0	HORMA domain containing 2		C22ORF42	Q6IC83		regulation of RNA metabolic process (GO:0051252)	3738	2	13.43	-	0.15	0.000105	0.0289
39	MS4A5	64232	2.4037	0.0016	membrane-spanning 4-domains, subfamily A, member 5		AKAP4	Q5JQC9		positive regulation of cellular process (GO:0048522)	5656	3	20.32	-	0.15	2.94e-07	0.000258
40	ACTRT2	140625	2.4037	0.0005	actin-related protein T2		INSL6	Q9Y581		regulation of cellular macromolecule biosynthetic process (GO:2000112)	3913	2	14.06	-	0.14	4.25e-05	0.0131
41	CETN1	1068	2.4037	0.0005	centrin, EF-hand protein, 1		UBE2DNL	Q8IWF7		regulation of macromolecule biosynthetic process (GO:0010556)	3944	2	14.17	-	0.14	4.16e-05	0.0137
42	ZNF645	158506	2.4012	0.0001	zinc finger protein 645		GML	Q99445		regulation of nucleobase-containing compound metabolic process (GO:0019219)	4007	2	14.4	-	0.14	4.21e-05	0.0133
43	LIPJ	142910	2.3971	0	lipase, family member J		APOBEC4	Q8WW27		regulation of cellular metabolic process (GO:0031323)	6106	3	21.94	-	0.14	5.12e-08	6.73e-05
44	C3ORF30	152405	2.3963	0	chromosome 3 open reading frame 30		CCDC38	Q502W7		regulation of cellular biosynthetic process (GO:0031326)	4105	2	14.75	-	0.14	2.59e-05	0.00996
45	HSF5	124535	2.39	0	heat shock transcription factor family member 5		SPATA19	Q7Z5L4		positive regulation of biological process (GO:0048518)	6244	3	22.44	-	0.13	2.81e-08	4.93e-05
46	FSCN3	29999	2.385	0.0016	fascin homolog 3, actin-bundling protein, testicular (Strongylocentrotus purpuratus)		TMCO2	Q7Z6W1		regulation of biosynthetic process (GO:0009889)	4189	2	15.05	-	0.13	1.6e-05	0.00723
47	LOC729296	729296	2.384	0	uncharacterized LOC729296		C22ORF43	Q6PGQ1		regulation of macromolecule metabolic process (GO:0060255)	6301	3	22.64	-	0.13	1.62e-08	3.66e-05
48	IQCF3	401067	2.3812	0	IQ motif containing F3		TDRD10	Q5VZ19		system development (GO:0048731)	4279	2	15.37	-	0.13	1.01e-05	0.00482
49	C22ORF42	150297	2.38	0.0001	chromosome 22 open reading frame 42		SLC22A16	Q86VW1		regulation of nitrogen compound metabolic process (GO:0051171)	5688	2	20.44	-	0.1	2.64e-08	5.21e-05
50	AKAP4	8852	2.3788	0	A kinase (PRKA) anchor protein 4		BPIFA3	Q9BQP9		regulation of primary metabolic process (GO:0080090)	5892	2	21.17	-	0.09	1.41e-08	4.45e-05
51	FAM181A-AS1	283592	2.3771	0	FAM181A antisense RNA 1 (non-protein coding)		FAM71F2	Q6NXP2		cellular localization (GO:0051641)	3003	1	10.79	-	0.09	0.000197	0.0494
52	ANKRD26P3	100101938	2.3729	0	ankyrin repeat domain 26 pseudogene 3		TXNDC2	Q86VQ3		positive regulation of nitrogen compound metabolic process (GO:0051173)	3058	1	10.99	-	0.09	0.000201	0.0495
53	INSL6	11172	2.3725	0	insulin-like 6		C2ORF77	Q0VFZ6		regulation of molecular function (GO:0065009)	3178	1	11.42	-	0.09	0.000128	0.0348
54	UBE2DNL	100131816	2.3725	0.0005	ubiquitin-conjugating enzyme E2D N-terminal like (pseudogene)		FAM75D1	Q6ZQQ2		positive regulation of cellular metabolic process (GO:0031325)	3238	1	11.63	-	0.09	7.92e-05	0.0231
55	GML	2765	2.3688	0.0085	glycosylphosphatidylinositol anchored molecule like protein		VWA3B	Q502W6		positive regulation of macromolecule metabolic process (GO:0010604)	3431	1	12.33	-	0.08	5.16e-05	0.0157
56	APOBEC4	403314	2.3671	0.0026	apolipoprotein B mRNA editing enzyme, catalytic polypeptide-like 4 (putative)		ATP1A4	Q13733		regulation of signaling (GO:0023051)	3459	1	12.43	-	0.08	3.12e-05	0.0109
57	CCDC38	120935	2.3663	0	coiled-coil domain containing 38		KIF2B	Q8N4N8		regulation of transcription, DNA-templated (GO:0006355)	3464	1	12.45	-	0.08	3.11e-05	0.0111
58	SPATA19	219938	2.3612	0.0001	spermatogenesis associated 19		ACRV1	P26436		regulation of nucleic acid-templated transcription (GO:1903506)	3465	1	12.45	-	0.08	3.11e-05	0.0114
59	C20ORF61	728450	2.36	0.0142	chromosome 20 open reading frame 61		TMEM239	Q8WW34		regulation of RNA biosynthetic process (GO:2001141)	3470	1	12.47	-	0.08	3.1e-05	0.0116
60	TMCO2	127391	2.36	0	transmembrane and coiled-coil domains 2		C2ORF73	Q8N5S3		positive regulation of metabolic process (GO:0009893)	3719	1	13.36	-	0.07	1.18e-05	0.00547
61	C22ORF43	51233	2.3588	0	chromosome 22 open reading frame 43		MBD3L1	Q8WWY6		response to chemical (GO:0042221)	4369	1	15.7	-	0.06	9.43e-07	0.000709
62	TDRD10	126668	2.3563	0.0005	tudor domain containing 10		DPEP3	Q9H4B8		response to organic substance (GO:0010033)	2995	0	10.76	-	< 0.01	1.66e-05	0.0071
63	SLC22A16	85413	2.3537	0	solute carrier family 22 (organic cation/carnitine transporter), member 16		CTAGE1	Q9HC47		regulation of signal transduction (GO:0009966)	3047	0	10.95	-	< 0.01	1.77e-05	0.00733
64	BPIFA3	128861	2.3537	0.0003	BPI fold containing family A, member 3		DNHD1	Q96M86		regulation of response to stimulus (GO:0048583)	4240	0	15.23	-	< 0.01	5.6e-08	6.79e-05
65	FAM71F2	346653	2.3529	0	family with sequence similarity 71, member F2		C7ORF34	Q96L11		regulation of developmental process (GO:0050793)	2441	0	8.77	-	< 0.01	0.00018	0.0457
66	TIPARP-AS1	100287227	2.3529	0	TIPARP antisense RNA 1 (non-protein coding)		TDRG1	Q3Y452		regulation of cell communication (GO:0010646)	3424	0	12.3	-	< 0.01	2.27e-06	0.00156
67	TXNDC2	84203	2.3525	0.0002	thioredoxin domain containing 2 (spermatozoa)		TEKT5	Q96M29
68	C2ORF77	129881	2.35	0.0006	chromosome 2 open reading frame 77		C2ORF51	Q96LM6
69	LOC400794	400794	2.3475	0.0029	uncharacterized LOC400794		FAM154A	Q8IYX7
70	FAM75D1	389763	2.3471	0.0361	family with sequence similarity 75, member D1		CCDC105	Q8IYK2
71	VWA3B	200403	2.345	0.0011	von Willebrand factor A domain containing 3B		FAM47A	Q5JRC9
72	LOC100286922	100286922	2.3443	0.0067	DnaJ (Hsp40) homolog, subfamily B, member 3 pseudogene		C10ORF62	Q5T681
73	ATP1A4	480	2.34	0.0002	ATPase, Na+/K+ transporting, alpha 4 polypeptide		SPPL2C	Q8IUH8
74	KIF2B	84643	2.3387	0	kinesin family member 2B		PAPOLB	Q9NRJ5
75	ACRV1	56	2.3387	0.0306	acrosomal vesicle protein 1		SUN5	Q8TC36
76	TMEM239	100288797	2.3386	0.0122	transmembrane protein 239		TSPYL6	Q8N831
77	C2ORF73	129852	2.3375	0.0004	chromosome 2 open reading frame 73		DNM1P46	Q6ZS02
78	MBD3L1	85509	2.335	0.0002	methyl-CpG binding domain protein 3-like 1		LINC00588	Q9Y4M8
79	LOC388882	388882	2.3329	0.0006	uncharacterized LOC388882		TTTY12	Q9BZ98
80	DPEP3	64180	2.3325	0.0005	dipeptidase 3
81	CTAGE1	64693	2.3287	0.0017	cutaneous T-cell lymphoma-associated antigen 1
82	DNHD1	144132	2.3263	0.0034	dynein heavy chain domain 1
83	C7ORF34	135927	2.3263	0.0003	chromosome 7 open reading frame 34
84	TDRG1	732253	2.3238	0.0107	testis development related 1 (non-protein coding)
85	TEKT5	146279	2.3225	0.0006	tektin 5
86	C2ORF51	200523	2.3212	0.0011	chromosome 2 open reading frame 51
87	FAM154A	158297	2.315	0.0002	family with sequence similarity 154, member A
88	CCDC105	126402	2.3138	0.0021	coiled-coil domain containing 105
89	FAM47A	158724	2.3112	0	family with sequence similarity 47, member A
90	C10ORF62	414157	2.31	0.0002	chromosome 10 open reading frame 62
91	SPPL2C	162540	2.31	0.0044	signal peptide peptidase like 2C
92	PAPOLB	56903	2.3087	0	poly(A) polymerase beta (testis specific)
93	SUN5	140732	2.3075	0.0072	Sad1 and UNC84 domain containing 5
94	LOC255025	255025	2.3071	0	uncharacterized LOC255025
95	ARRDC3-AS1	100129716	2.3071	0	ARRDC3 antisense RNA 1 (non-protein coding)
96	TSPYL6	388951	2.305	0.0002	TSPY-like 6
97	DNM1P46	196968	2.3012	0.0003	DNM1 pseudogene 46
98	LINC00588	26138	2.2987	0.0002	long intergenic non-protein coding RNA 588
99	LOC100133308	100133308	2.2957	0	Ras suppressor protein 1 pseudogene
100	TTTY12	83867	2.2938	0.0009	testis-specific transcript, Y-linked 12 (non-protein coding)

## Sheet: Table 4 RSRP1
Query genes:							Gene Name	Entry		Analysis Type:	PANTHER Overrepresentation Test (Released 20210224)
Query Gene	Entrez ID	Coexpression Score	P-Value	Description			AMY2B	P19961		Annotation Version and Release Date:	GO Ontology database DOI: 10.5281/zenodo.4495804 Released 2021-02-01
C1ORF63	57035	-3.2	0.0029	chromosome 1 open reading frame 63			CLK1	P49759		Analyzed List:	Client Text Box Input (Homo sapiens)
Coexpressed genes:							PNISR	Q8TF01		Reference List:	Homo sapiens (all genes in database)
Rank	Gene	Entrez ID	Coexpression Score	P-Value	Description		ARGLU1	Q9NWB6		Test Type:	FISHER
1	AMY2B	280	2.9137	0	amylase, alpha 2B (pancreatic)		CLK4	Q9HAZ1		Correction:	FDR
2	CLK1	1195	2.8558	0.0002	CDC-like kinase 1		KIAA0907	Q7Z7F0		GO biological process complete	Homo sapiens - REFLIST (20595)	Client Text Box Input (89)	Client Text Box Input (expected)	Client Text Box Input (over/under)	Client Text Box Input (fold Enrichment)	Client Text Box Input (raw P-value)	Client Text Box Input (FDR)	Category
3	PNISR	25957	2.7792	0.0014	PNN-interacting serine/arginine-rich protein		TIA1	P31483		histone mRNA catabolic process (GO:0071044)	11	3	0.05	+	63.11	2.71e-05	0.0194	chromatin organization
4	ARGLU1	55082	2.7267	0	arginine and glutamate rich 1		NKTR	P30414		mRNA splice site selection (GO:0006376)	32	4	0.14	+	28.93	1.7e-05	0.0128	RNA splicing
5	CLK4	57396	2.6192	0.0029	CDC-like kinase 4		ZFC3H1	O60293		spliceosomal complex assembly (GO:0000245)	57	5	0.25	+	20.3	7.02e-06	0.00615
6	KIAA0907	22889	2.5775	0.0008	KIAA0907		OGT	O15294		regulation of RNA splicing (GO:0043484)	149	8	0.64	+	12.42	3.87e-07	0.000407	RNA splicing
7	TIA1	7072	2.5175	0.0051	TIA1 cytotoxic granule-associated RNA binding protein		FNBP4	Q8N3X1		regulation of mRNA processing (GO:0050684)	141	6	0.61	+	9.85	4.16e-05	0.0273	regulation of mRNA processing
8	LOC440944	440944	2.4957	0.0002	uncharacterized LOC440944		LUC7L3	O95232		RNA splicing (GO:0008380)	407	16	1.76	+	9.1	3.19e-11	1.26e-07
9	NKTR	4820	2.4908	0.0049	natural killer-tumor recognition sequence		AHSA2	Q719I0		mRNA processing (GO:0006397)	484	19	2.09	+	9.08	3.61e-13	5.69e-09
10	ZFC3H1	196441	2.3975	0.0006	zinc finger, C3H1-type containing		RBM5	P52756		mRNA splicing, via spliceosome (GO:0000398)	302	11	1.31	+	8.43	1.02e-07	0.000179
11	OGT	8473	2.3808	0.0006	O-linked N-acetylglucosamine (GlcNAc) transferase		ZNF83	P51522		RNA splicing, via transesterification reactions with bulged adenosine as nucleophile (GO:0000377)	302	11	1.31	+	8.43	1.02e-07	0.000161
12	FNBP4	23360	2.3475	0.0035	formin binding protein 4		EED	O75530		RNA splicing, via transesterification reactions (GO:0000375)	305	11	1.32	+	8.35	1.13e-07	0.000161
13	LUC7L3	51747	2.3417	0.0056	LUC7-like 3 (S. cerevisiae)		MED23	Q9ULK4		regulation of chromatin organization (GO:1902275)	203	7	0.88	+	7.98	3.43e-05	0.0235	chromatin organization
14	AHSA2	130872	2.3087	0.0026	AHA1, activator of heat shock 90kDa protein ATPase homolog 2 (yeast)		SHPRH	Q149N8		mRNA metabolic process (GO:0016071)	694	21	3	+	7	2.19e-12	1.15e-08
15	RBM5	10181	2.2942	0.0067	RNA binding motif protein 5		CCNL1	Q9UK58		RNA processing (GO:0006396)	923	24	3.99	+	6.02	1.02e-12	8.03e-09
16	ZNF83	55769	2.2458	0.0021	zinc finger protein 83		TTC14	Q96N46		RNA metabolic process (GO:0016070)	1599	27	6.91	+	3.91	4.9e-10	1.29e-06
17	EED	8726	2.2342	0	embryonic ectoderm development		ZRANB2	O95218		nucleic acid metabolic process (GO:0090304)	2232	32	9.65	+	3.32	4.23e-10	1.33e-06
18	MED23	9439	2.23	0.0012	mediator complex subunit 23		VPS13C	Q709C8		gene expression (GO:0010467)	2186	27	9.45	+	2.86	3.36e-07	0.000408
19	SHPRH	257218	2.21	0.0232	SNF2 histone linker PHD RING helicase, E3 ubiquitin protein ligase		RBM26	Q5T8P6		nucleobase-containing compound metabolic process (GO:0006139)	2719	32	11.75	+	2.72	5.19e-08	0.000117
20	CCNL1	57018	2.1983	0.0023	cyclin L1		PAN3	Q58A45		heterocycle metabolic process (GO:0046483)	2904	32	12.55	+	2.55	2.4e-07	0.000315
21	TTC14	151613	2.1975	0.0041	tetratricopeptide repeat domain 14		ZNF266	Q14584		cellular aromatic compound metabolic process (GO:0006725)	2948	32	12.74	+	2.51	3.38e-07	0.000381
22	ZRANB2	9406	2.1713	0.0024	zinc finger, RAN-binding domain containing 2		RCBTB2	O95199		regulation of RNA metabolic process (GO:0051252)	3738	38	16.15	+	2.35	9.33e-08	0.000184
23	VPS13C	54832	2.1692	0.0117	vacuolar protein sorting 13 homolog C (S. cerevisiae)		TARDBP	Q13148		organic cyclic compound metabolic process (GO:1901360)	3190	32	13.79	+	2.32	2.25e-06	0.00208
24	RBM26	64062	2.1317	0.0043	RNA binding motif protein 26		GOLGA8A	A7E2F4		regulation of nucleobase-containing compound metabolic process (GO:0019219)	4007	38	17.32	+	2.19	5.76e-07	0.000568
25	PAN3	255967	2.1233	0.0044	PAN3 poly(A) specific ribonuclease subunit homolog (S. cerevisiae)		N4BP2L2	Q92802		cellular nitrogen compound metabolic process (GO:0034641)	3407	32	14.72	+	2.17	9.83e-06	0.00816
26	ZNF266	10781	2.1233	0.0005	zinc finger protein 266		DMTF1	Q9Y222		regulation of gene expression (GO:0010468)	4872	40	21.05	+	1.9	1.37e-05	0.0108
27	RCBTB2	1102	2.1192	0.0009	regulator of chromosome condensation (RCC1) and BTB (POZ) domain containing protein 2		ZNF137P	P52743
28	TARDBP	23435	2.1083	0.0022	TAR DNA binding protein		MYSM1	Q5VVJ2
29	GOLGA8A	23015	2.1025	0.0016	golgin A8 family, member A		SNHG12	Q9BXW3
30	N4BP2L2	10443	2.0983	0.0103	NEDD4 binding protein 2-like 2		SON	P18583
31	DMTF1	9988	2.095	0.0141	cyclin D binding myb-like transcription factor 1		ATAD2B	Q9ULI0
32	ZNF137P	7696	2.0683	0.0002	zinc finger protein 137, pseudogene		DDX26B	Q5JSJ4
33	MYSM1	114803	2.0617	0.0076	Myb-like, SWIRM and MPN domains 1		DMXL1	Q9Y485
34	HNRNPU-AS1	284702	2.06	0.0113	HNRNPU antisense RNA 1 (non-protein coding)		ATM	Q13315
35	SNHG12	85028	2.0563	0.0018	small nucleolar RNA host gene 12 (non-protein coding)		NXF1	Q9UBU9
36	SON	6651	2.0517	0.0092	SON DNA binding protein		SRSF5	Q13243
37	MALAT1	378938	2.0438	0.0037	metastasis associated lung adenocarcinoma transcript 1 (non-protein coding)		WSB1	Q9Y6I7
38	ATAD2B	54454	2.035	0.0066	ATPase family, AAA domain containing 2B		OFD1	O75665
39	DDX26B	203522	2.0313	0.0003	DEAD/H (Asp-Glu-Ala-Asp/His) box polypeptide 26B		SRSF11	Q05519
40	DMXL1	1657	2.0308	0.0213	Dmx-like 1		FAM208A	Q9UK61
41	ATM	472	2.0292	0.0019	ataxia telangiectasia mutated		RBM39	Q14498
42	NXF1	10482	2.0292	0.0029	nuclear RNA export factor 1		FAM13B	Q9NYF5
43	LOC100289230	100289230	2.0257	0.0002	uncharacterized LOC100289230		CCNL2	Q96S94
44	SRSF5	6430	2.0225	0.0011	serine/arginine-rich splicing factor 5		ARID4B	Q4LE39
45	WSB1	26118	2.02	0.0051	WD repeat and SOCS box containing 1		BTAF1	O14981
46	OFD1	8481	2.0158	0.0021	oral-facial-digital syndrome 1		PPWD1	Q96BP3
47	PHIP	55023	2.0083	0.016	pleckstrin homology domain interacting protein		STX16	O14662
48	SRSF11	9295	2.0008	0.0145	serine/arginine-rich splicing factor 11		PAPD4	Q6PIY7
49	FAM208A	23272	1.9925	0.0181	family with sequence similarity 208, member A		RNPC3	Q96LT9
50	RBM39	9584	1.9917	0.0069	RNA binding motif protein 39		TRMT13	Q9NUP7
51	FAM13B	51306	1.9908	0.0105	family with sequence similarity 13, member B		ACAP2	Q15057
52	CCNL2	81669	1.9858	0.0045	cyclin L2		SLTM	Q9NWH9
53	ARID4B	51742	1.9825	0.0273	AT rich interactive domain 4B (RBP1-like)		SACM1L	Q9NTJ5
54	BTAF1	9044	1.9783	0.0106	BTAF1 RNA polymerase II, B-TFIID transcription factor-associated, 170kDa (Mot1 homolog, S. cerevisiae)		CREBZF	Q9NS37
55	PPWD1	23398	1.9758	0.0254	peptidylprolyl isomerase domain and WD repeat containing 1		SPG11	Q96JI7
56	STX16	8675	1.9742	0.0014	syntaxin 16		EPM2AIP1	Q7L775
57	PAPD4	167153	1.9737	0.043	PAP associated domain containing 4		UHRF2	Q96PU4
58	RNPC3	55599	1.9713	0.0017	RNA-binding region (RNP1, RRM) containing 3		ZNF451	Q9Y4E5
59	TRMT13	54482	1.97	0.027	tRNA methyltransferase 13 homolog (S. cerevisiae)		ANKHD1	Q8IWZ3
60	ACAP2	23527	1.97	0.0279	ArfGAP with coiled-coil, ankyrin repeat and PH domains 2		HNRNPA3	P51991
61	SLTM	79811	1.9608	0.0288	SAFB-like, transcription modulator		LENG8	Q96PV6
62	SACM1L	22908	1.9525	0.0226	SAC1 suppressor of actin mutations 1-like (yeast)		PWWP2A	Q96N64
63	SNORA25	684959	1.9509	0.0014	small nucleolar RNA, H/ACA box 25		MPHOSPH8	Q99549
64	CREBZF	58487	1.95	0.0035	CREB/ATF bZIP transcription factor		PHC3	Q8NDX5
65	SPG11	80208	1.9483	0.0175	spastic paraplegia 11 (autosomal recessive)		ZNF292	O60281
66	EPM2AIP1	9852	1.9442	0.0044	EPM2A (laforin) interacting protein 1		ZNF767	Q75MW2
67	UHRF2	115426	1.935	0.0025	ubiquitin-like with PHD and ring finger domains 2, E3 ubiquitin protein ligase		REV1	Q9UBZ9
68	ZNF451	26036	1.9175	0.016	zinc finger protein 451		NSUN5P1	Q3KNT7
69	SNORA61	677838	1.9157	0.0008	small nucleolar RNA, H/ACA box 61		TRAPPC2	P0DI81
70	ANKHD1	54882	1.9092	0.0049	ankyrin repeat and KH domain containing 1		PHIP,WDR11	Q8WWQ0
71	HNRNPA3	220988	1.9092	0.0102	heterogeneous nuclear ribonucleoprotein A3		WDR11	Q9BZH6
72	LENG8	114823	1.9088	0.0082	leukocyte receptor cluster (LRC) member 8		ZNF611	Q8N823
73	PWWP2A	114825	1.9075	0.0003	PWWP domain containing 2A		DCLRE1C	Q96SD1
74	MPHOSPH8	54737	1.9067	0.0046	M-phase phosphoprotein 8		ANKRD49	Q8WVL7
75	PHC3	80012	1.905	0.0153	polyhomeotic homolog 3 (Drosophila)		ZNF136	P52737
76	ZNF292	23036	1.905	0.0173	zinc finger protein 292		PRPF39	Q86UA1
77	ZNF767	79970	1.9	0.0108	zinc finger family member 767		USP48	Q86UV5
78	REV1	51455	1.895	0.0184	REV1, polymerase (DNA directed)		XRN1	Q8IZH2
79	NSUN5P1	155400	1.8925	0.0071	NOP2/Sun domain family, member 5 pseudogene 1		KIAA0528	Q86YS7
80	TUG1	55000	1.8917	0.0117	taurine upregulated 1 (non-protein coding)		SREK1	Q8WXA9
81	TRAPPC2	6399	1.89	0.0005	trafficking protein particle complex 2		DOCK8	Q8NF50
82	WDR11	55717	1.8825	0.0316	WD repeat domain 11		MLL5	Q8IZD2
83	ZNF611	81856	1.8771	0.0025	zinc finger protein 611		ZNF789	Q5FWF6
84	DCLRE1C	64421	1.875	0.0017	DNA cross-link repair 1C		USP33	Q8TEY7
85	ANKRD49	54851	1.8717	0.0017	ankyrin repeat domain 49		FAM76B	Q5HYJ3
86	ZNF136	7695	1.8692	0.0034	zinc finger protein 136		MGEA5	O60502
87	PRPF39	55015	1.865	0.0105	PRP39 pre-mRNA processing factor 39 homolog (S. cerevisiae)		RBM6	P78332
88	DKFZP434I0714	54553	1.8613	0.0001	uncharacterized protein DKFZP434I0714		DDX5	P17844
89	USP48	84196	1.8483	0.0024	ubiquitin specific peptidase 48
90	XRN1	54464	1.8475	0.0496	5'-3' exoribonuclease 1
91	KIAA0528	9847	1.845	0.0253	KIAA0528
92	SREK1	140890	1.8417	0.0142	splicing regulatory glutamine/lysine-rich protein 1
93	DOCK8	81704	1.8412	0.0043	dedicator of cytokinesis 8
94	MLL5	55904	1.8412	0.029	myeloid/lymphoid or mixed-lineage leukemia 5 (trithorax homolog, Drosophila)
95	ZNF789	285989	1.8375	0.0013	zinc finger protein 789
96	USP33	23032	1.8333	0.0285	ubiquitin specific peptidase 33
97	FAM76B	143684	1.8325	0.024	family with sequence similarity 76, member B
98	MGEA5	10724	1.825	0.0202	meningioma expressed antigen 5 (hyaluronidase)
99	RBM6	10180	1.8242	0.0117	RNA binding motif protein 6
100	DDX5	1655	1.8225	0.016	DEAD (Asp-Glu-Ala-Asp) box helicase 5

## Sheet: Table 5 TMEM53
Query genes:							Gene Name	Entry		Analysis Type:	PANTHER Overrepresentation Test (Released 20210224)
Query Gene	Entrez ID	Coexpression Score	P-Value	Description			ACOT12	Q8WYK0		Annotation Version and Release Date:	GO Ontology database DOI: 10.5281/zenodo.4495804 Released 2021-02-01
TMEM53	79639	-3.2	0	transmembrane protein 53			SLC22A18	Q96BI1		Analyzed List:	Client Text Box Input (Homo sapiens)
Coexpressed genes:							CPN1	P15169		Reference List:	Homo sapiens (all genes in database)
Rank	Gene	Entrez ID	Coexpression Score	P-Value	Description		CPB2	Q96IY4		Test Type:	FISHER
1	ACOT12	134526	2.1588	0	acyl-CoA thioesterase 12		PCYT2	Q99447		Correction:	FDR
2	SLC22A18	5002	2.085	0	solute carrier family 22, member 18		ACY1	Q03154		GO biological process complete	Homo sapiens - REFLIST (20595)	Client Text Box Input (98)	Client Text Box Input (expected)	Client Text Box Input (over/under)	Client Text Box Input (fold Enrichment)	Client Text Box Input (raw P-value)	Client Text Box Input (FDR)	Category
3	CPN1	1369	1.9858	0	carboxypeptidase N, polypeptide 1		MST1	P26927		negative regulation of intestinal cholesterol absorption (GO:0045796)	2	2	0.01	+	> 100	0.000132	0.0136	lipid metabolism, transport, absorption and homeostasis
4	CPB2	1361	1.9658	0	carboxypeptidase B2 (plasma)		SERPINF2	P08697		negative regulation of intestinal lipid absorption (GO:1904730)	2	2	0.01	+	> 100	0.000132	0.0135
5	PCYT2	5833	1.9575	0.0001	phosphate cytidylyltransferase 2, ethanolamine		GJB1	P08034		tricarboxylic acid transmembrane transport (GO:0035674)	2	2	0.01	+	> 100	0.000132	0.0134	acetyl-CoA and tricarboxylic acid cycle-related processes
6	ACY1	95	1.95	0.0002	aminoacylase 1		ANG	P03950		negative regulation of intestinal phytosterol absorption (GO:0010949)	2	2	0.01	+	> 100	0.000132	0.0133
7	MST1	4485	1.9442	0.0001	macrophage stimulating 1 (hepatocyte growth factor-like)		CYP27A1	Q02318		positive regulation of very-low-density lipoprotein particle remodeling (GO:0010902)	2	2	0.01	+	> 100	0.000132	0.0132	lipid metabolism, transport, absorption and homeostasis
8	SERPINF2	5345	1.935	0	serpin peptidase inhibitor, clade F (alpha-2 antiplasmin, pigment epithelium derived factor), member 2		REEP6	Q96HR9		negative regulation of intestinal absorption (GO:1904479)	3	2	0.01	+	> 100	0.00022	0.0203
9	GJB1	2705	1.9342	0.0003	gap junction protein, beta 1, 32kDa		TM4SF5	O14894		negative regulation of fibrinolysis (GO:0051918)	10	6	0.05	+	> 100	7.45e-11	5.34e-08	wound healing and coagulation
10	ANG	283	1.9267	0.0002	angiogenin, ribonuclease, RNase A family, 5		CYP4F2	P78329		regulation of fibrinolysis (GO:0051917)	14	7	0.07	+	> 100	4.73e-12	4.39e-09
11	CYP27A1	1593	1.92	0	cytochrome P450, family 27, subfamily A, polypeptide 1		CDHR2	Q9BYE9		positive regulation of fibrinolysis (GO:0051919)	4	2	0.02	+	> 100	0.000329	0.0287	wound healing and coagulation
12	REEP6	92840	1.9025	0	receptor accessory protein 6		GLYCTK	Q8IVS8		regulation of very-low-density lipoprotein particle remodeling (GO:0010901)	6	3	0.03	+	> 100	8.48e-06	0.00152
13	TM4SF5	9032	1.8975	0.0002	transmembrane 4 L six family member 5		ABCG5	Q9H222		tricarboxylic acid transport (GO:0006842)	5	2	0.02	+	84.06	0.000459	0.0389
14	CYP4F2	8529	1.8975	0	cytochrome P450, family 4, subfamily F, polypeptide 2		APOA5	Q6Q788		fructose catabolic process (GO:0006001)	5	2	0.02	+	84.06	0.000459	0.0387
15	CDHR2	54825	1.88	0	cadherin-related family member 2		KHK	P50053		fibrinolysis (GO:0042730)	20	8	0.1	+	84.06	5.44e-13	6.12e-10	wound healing and coagulation
16	GLYCTK	132158	1.8737	0.0001	glycerate kinase		HRG	P04196		induction of bacterial agglutination (GO:0043152)	5	2	0.02	+	84.06	0.000459	0.0385	inflammation and immune response
17	ABCG5	64240	1.8658	0	ATP-binding cassette, sub-family G (WHITE), member 5		MAT1A	Q00266		fructose catabolic process to hydroxyacetone phosphate and glyceraldehyde-3-phosphate (GO:0061624)	5	2	0.02	+	84.06	0.000459	0.0383	carbohydrate-related processes
18	APOA5	116519	1.8637	0.0003	apolipoprotein A-V		SEC16B	Q96JE7		citrate transport (GO:0015746)	5	2	0.02	+	84.06	0.000459	0.0381	acetyl-CoA and tricarboxylic acid cycle-related processes
19	KHK	3795	1.8575	0.0019	ketohexokinase (fructokinase)		CHST13	Q8NET6		positive regulation of lipoprotein lipase activity (GO:0051006)	9	3	0.04	+	70.05	2.2e-05	0.0034	lipid metabolism, transport, absorption and homeostasis
20	HRG	3273	1.8517	0.0047	histidine-rich glycoprotein		MBL2	P11226		regulation of intestinal lipid absorption (GO:1904729)	9	3	0.04	+	70.05	2.2e-05	0.00336
21	MAT1A	4143	1.8508	0.0003	methionine adenosyltransferase I, alpha		A1CF	Q9NQ94		negative regulation of plasminogen activation (GO:0010757)	6	2	0.03	+	70.05	0.00061	0.0465	wound healing and coagulation
22	SEC16B	89866	1.85	0	SEC16 homolog B (S. cerevisiae)		C8A	P07357		regulation of intestinal cholesterol absorption (GO:0030300)	9	3	0.04	+	70.05	2.2e-05	0.00333
23	CHST13	166012	1.8138	0	carbohydrate (chondroitin 4) sulfotransferase 13		AGXT	P21549		bile acid signaling pathway (GO:0038183)	13	4	0.06	+	64.66	1.07e-06	0.000261	lipid metabolism, transport, absorption and homeostasis
24	MBL2	4153	1.8092	0	mannose-binding lectin (protein C) 2, soluble		FAH	P16930		positive regulation of hemostasis (GO:1900048)	23	7	0.11	+	63.96	8e-11	5.49e-08
25	A1CF	29974	1.805	0.0004	APOBEC1 complementation factor		NR1H4	Q96RI1		positive regulation of blood coagulation (GO:0030194)	23	7	0.11	+	63.96	8e-11	5.26e-08
26	C8A	731	1.8008	0.0002	complement component 8, alpha polypeptide		PON3	Q15166		positive regulation of triglyceride lipase activity (GO:0061365)	10	3	0.05	+	63.05	2.85e-05	0.00404
27	AGXT	189	1.7883	0.0003	alanine-glyoxylate aminotransferase		SLC22A9	Q8IVM8		positive regulation of coagulation (GO:0050820)	24	7	0.11	+	61.29	1.03e-10	6.25e-08
28	FAH	2184	1.7825	0.0004	fumarylacetoacetate hydrolase (fumarylacetoacetase)		ARSE	P51690		plasminogen activation (GO:0031639)	11	3	0.05	+	57.31	3.61e-05	0.00475	wound healing and coagulation
29	NR1H4	9971	1.7817	0.0005	nuclear receptor subfamily 1, group H, member 4		MVK	Q03426		regulation of intestinal absorption (GO:1904478)	11	3	0.05	+	57.31	3.61e-05	0.00471
30	PON3	5446	1.7775	0	paraoxonase 3		CPN2	P22792		blood coagulation, intrinsic pathway (GO:0007597)	17	4	0.08	+	49.45	2.66e-06	0.000583	wound healing and coagulation
31	SLC22A9	114571	1.7725	0	solute carrier family 22 (organic anion transporter), member 9		PLG	P00747		sulfur amino acid catabolic process (GO:0000098)	13	3	0.06	+	48.5	5.52e-05	0.0068	aminoacid metabolism
32	ARSE	415	1.7708	0	arylsulfatase E (chondrodysplasia punctata 1)		KLB	Q86Z14		regulation of plasminogen activation (GO:0010755)	13	3	0.06	+	48.5	5.52e-05	0.00674
33	MVK	4598	1.7575	0.008	mevalonate kinase		MASP2	O00187		blood coagulation, fibrin clot formation (GO:0072378)	27	6	0.13	+	46.7	9.65e-09	3.71e-06
34	CPN2	1370	1.7575	0.0002	carboxypeptidase N, polypeptide 2		PZP	P20742		protein activation cascade (GO:0072376)	27	6	0.13	+	46.7	9.65e-09	3.62e-06
35	PLG	5340	1.7567	0	plasminogen		SCARB1	Q8WTV0		triglyceride homeostasis (GO:0070328)	36	8	0.17	+	46.7	2.91e-11	2.42e-08	lipid metabolism, transport, absorption and homeostasis
36	KLB	152831	1.755	0	klotho beta		FGB	P02675		acylglycerol homeostasis (GO:0055090)	36	8	0.17	+	46.7	2.91e-11	2.3e-08
37	MASP2	10747	1.7533	0.0055	mannan-binding lectin serine peptidase 2		PROC	P04070		negative regulation of cholesterol transport (GO:0032375)	14	3	0.07	+	45.03	6.67e-05	0.00786
38	PZP	5858	1.7517	0.0028	pregnancy-zone protein		HNF4A	P41235		negative regulation of sterol transport (GO:0032372)	14	3	0.07	+	45.03	6.67e-05	0.0078
39	SCARB1	949	1.7508	0.0008	scavenger receptor class B, member 1		BTBD16	Q32M84		negative regulation of blood coagulation (GO:0030195)	52	11	0.25	+	44.46	7.58e-15	1.99e-11
40	FGB	2244	1.7492	0.0001	fibrinogen beta chain		DECR2	Q9NUI1		negative regulation of hemostasis (GO:1900047)	53	11	0.25	+	43.62	9.12e-15	2.06e-11
41	PROC	5624	1.7433	0.0005	protein C (inactivator of coagulation factors Va and VIIIa)		TM4SF4	P48230		cholesterol efflux (GO:0033344)	25	5	0.12	+	42.03	2.79e-07	8e-05	lipid metabolism, transport, absorption and homeostasis
42	HNF4A	3172	1.7433	0.0349	hepatocyte nuclear factor 4, alpha		SAA4	P35542		negative regulation of coagulation (GO:0050819)	56	11	0.27	+	41.28	1.56e-14	3.07e-11
43	BTBD16	118663	1.7413	0	BTB (POZ) domain containing 16		F12	P00748		pigment catabolic process (GO:0046149)	16	3	0.08	+	39.4	9.45e-05	0.0105
44	DECR2	26063	1.7325	0.0004	2,4-dienoyl CoA reductase 2, peroxisomal		HPX	P02790		porphyrin-containing compound catabolic process (GO:0006787)	16	3	0.08	+	39.4	9.45e-05	0.0104
45	TM4SF4	7104	1.725	0.0004	transmembrane 4 L six family member 4		APOH	P02749		tetrapyrrole catabolic process (GO:0033015)	16	3	0.08	+	39.4	9.45e-05	0.0103
46	LBX2-AS1	151534	1.725	0.0029	LBX2 antisense RNA 1 (non-protein coding)		ANGPTL6	Q8NI99		heme catabolic process (GO:0042167)	16	3	0.08	+	39.4	9.45e-05	0.0103	heme catabolic process
47	SAA4	6291	1.7229	0	serum amyloid A4, constitutive		APOC2	P02655		regulation of lipoprotein lipase activity (GO:0051004)	22	4	0.1	+	38.21	6.53e-06	0.00121
48	F12	2161	1.7225	0.0002	coagulation factor XII (Hageman factor)		ABCC2	Q92887		reverse cholesterol transport (GO:0043691)	18	3	0.09	+	35.03	0.000129	0.0134	lipid metabolism, transport, absorption and homeostasis
49	HPX	3263	1.7208	0.012	hemopexin		C8B	P07358		regulation of blood coagulation (GO:0030193)	71	11	0.34	+	32.56	1.6e-13	2.53e-10
50	APOH	350	1.7192	0	apolipoprotein H (beta-2-glycoprotein I)		PEMT	Q9UBM1		regulation of hemostasis (GO:1900046)	72	11	0.34	+	32.11	1.84e-13	2.64e-10
51	ANGPTL6	83854	1.7162	0	angiopoietin-like 6		FABP1	P07148		positive regulation of lipid catabolic process (GO:0050996)	27	4	0.13	+	31.13	1.35e-05	0.00219	lipid metabolism, transport, absorption and homeostasis
52	APOC2	344	1.7157	0.0002	apolipoprotein C-II		OAF	Q86UD1		negative regulation of wound healing (GO:0061045)	75	11	0.36	+	30.82	2.76e-13	3.62e-10
53	ABCC2	1244	1.715	0	ATP-binding cassette, sub-family C (CFTR/MRP), member 2		CYP3A43	Q9HB55		regulation of coagulation (GO:0050818)	76	11	0.36	+	30.42	3.14e-13	3.81e-10
54	C8B	732	1.7075	0	complement component 8, beta polypeptide		PNPLA3	Q9NST1		positive regulation of triglyceride metabolic process (GO:0090208)	22	3	0.1	+	28.66	0.00022	0.0204
55	PEMT	10400	1.7075	0.0019	phosphatidylethanolamine N-methyltransferase		AMDHD1	Q96NU7		intestinal absorption (GO:0050892)	32	4	0.15	+	26.27	2.48e-05	0.00369	lipid metabolism, transport, absorption and homeostasis
56	FABP1	2168	1.7033	0.0002	fatty acid binding protein 1, liver		MPST	P25325		plasma lipoprotein particle remodeling (GO:0034369)	32	4	0.15	+	26.27	2.48e-05	0.00366	lipid metabolism, transport, absorption and homeostasis
57	OAF	220323	1.6988	0.0023	OAF homolog (Drosophila)		PECR	Q9BY49		protein-lipid complex remodeling (GO:0034368)	32	4	0.15	+	26.27	2.48e-05	0.00362
58	CYP3A43	64816	1.6983	0.0032	cytochrome P450, family 3, subfamily A, polypeptide 43		TMPRSS6	Q8IU80		positive regulation of wound healing (GO:0090303)	57	7	0.27	+	25.81	2.14e-08	7.35e-06
59	PNPLA3	80339	1.6967	0.0001	patatin-like phospholipase domain containing 3		PON1	P27169		cytolysis (GO:0019835)	33	4	0.16	+	25.47	2.77e-05	0.00397	inflammation and immune response
60	AMDHD1	144193	1.695	0	amidohydrolase domain containing 1		TBC1D16	Q8TBP0		negative regulation of response to wounding (GO:1903035)	91	11	0.43	+	25.4	1.89e-12	1.98e-09
61	MPST	4357	1.6925	0.0022	mercaptopyruvate sulfurtransferase		ADH6	P28332		bile acid and bile salt transport (GO:0015721)	34	4	0.16	+	24.72	3.09e-05	0.00427	lipid metabolism, transport, absorption and homeostasis
62	PECR	55825	1.6908	0.0004	peroxisomal trans-2-enoyl-CoA reductase		NIPSNAP1	Q9BPW8		protein-containing complex remodeling (GO:0034367)	34	4	0.16	+	24.72	3.09e-05	0.00423
63	TMPRSS6	164656	1.6892	0.0469	transmembrane protease, serine 6		UGT2B4	P06133		heme metabolic process (GO:0042168)	43	5	0.2	+	24.44	3.13e-06	0.000677
64	PON1	5444	1.6792	0	paraoxonase 1		HGFAC	Q04756		triglyceride catabolic process (GO:0019433)	27	3	0.13	+	23.35	0.000381	0.033	lipid metabolism, transport, absorption and homeostasis
65	TBC1D16	125058	1.6788	0.0001	TBC1 domain family, member 16		SLC25A1	P53007		cholesterol homeostasis (GO:0042632)	83	9	0.39	+	22.79	5.18e-10	2.55e-07	lipid metabolism, transport, absorption and homeostasis
66	ADH6	130	1.6775	0.0039	alcohol dehydrogenase 6 (class V)		SLC22A7	Q9Y694		negative regulation of lipid transport (GO:0032369)	37	4	0.18	+	22.72	4.19e-05	0.00537
67	NIPSNAP1	8508	1.6717	0.0067	nipsnap homolog 1 (C. elegans)		GC	P02774		sterol homeostasis (GO:0055092)	84	9	0.4	+	22.52	5.71e-10	2.73e-07
68	UGT2B4	7363	1.6717	0	UDP glucuronosyltransferase 2 family, polypeptide B4		METTL7B	Q6UX53		zymogen activation (GO:0031638)	47	5	0.22	+	22.36	4.68e-06	0.000935
69	HGFAC	3083	1.67	0.0005	HGF activator		SGK2	Q9HBY8		bile acid biosynthetic process (GO:0006699)	29	3	0.14	+	21.74	0.000462	0.0382	lipid metabolism, transport, absorption and homeostasis
70	SLC25A1	6576	1.6692	0.0113	solute carrier family 25 (mitochondrial carrier; citrate transporter), member 1		KNG1	P01042		positive regulation of response to wounding (GO:1903036)	68	7	0.32	+	21.63	6.56e-08	2.11e-05
71	SLC22A7	10864	1.6683	0.0266	solute carrier family 22 (organic anion transporter), member 7		FMO5	P49326		porphyrin-containing compound metabolic process (GO:0006778)	50	5	0.24	+	21.02	6.2e-06	0.00119
72	GC	2638	1.6675	0	group-specific component (vitamin D binding protein)		G6PC	P35575		acetyl-CoA metabolic process (GO:0006084)	30	3	0.14	+	21.02	0.000507	0.0398	acetyl-CoA and tricarboxylic acid cycle-related processes
73	METTL7B	196410	1.6612	0	methyltransferase like 7B		SERPIND1	P05546		cholesterol transport (GO:0030301)	60	6	0.29	+	21.02	6.98e-07	0.000172
74	SGK2	10110	1.66	0	serum/glucocorticoid regulated kinase 2		ADH1A	P07327		acute-phase response (GO:0006953)	41	4	0.2	+	20.5	6.07e-05	0.00726	inflammation and immune response
75	KNG1	3827	1.6583	0.0006	kininogen 1		SLC25A10	Q9UBX3		bile acid metabolic process (GO:0008206)	41	4	0.2	+	20.5	6.07e-05	0.0072
76	FMO5	2330	1.6567	0.0019	flavin containing monooxygenase 5		SLC13A5	Q86YT5		regulation of cholesterol transport (GO:0032374)	56	5	0.27	+	18.76	1.04e-05	0.00178
77	G6PC	2538	1.6558	0.0005	glucose-6-phosphatase, catalytic subunit		AKR1C4	P17516		regulation of sterol transport (GO:0032371)	56	5	0.27	+	18.76	1.04e-05	0.00176
78	SERPIND1	3053	1.655	0	serpin peptidase inhibitor, clade D (heparin cofactor), member 1		AMBP	P02760		drug metabolic process (GO:0017144)	46	4	0.22	+	18.27	9.22e-05	0.0104	drug and xenobiotic metabolic process
79	ADH1A	124	1.655	0.0007	alcohol dehydrogenase 1A (class I), alpha polypeptide		ABCG8	Q9H221		regulation of wound healing (GO:0061041)	131	11	0.62	+	17.65	7.23e-11	5.43e-08
80	SLC25A10	1468	1.6525	0.0099	solute carrier family 25 (mitochondrial carrier; dicarboxylate transporter), member 10		HNF1A	P20823		regulation of lipid catabolic process (GO:0050994)	60	5	0.29	+	17.51	1.42e-05	0.00228
81	SLC13A5	284111	1.6513	0	solute carrier family 13 (sodium-dependent citrate transporter), member 5		SLC22A18AS	Q8N1D0		plasma lipoprotein particle organization (GO:0071827)	49	4	0.23	+	17.16	0.000116	0.0124
82	AKR1C4	1109	1.6483	0	aldo-keto reductase family 1, member C4 (chlordecone reductase; 3-alpha hydroxysteroid dehydrogenase, type I; dihydrodiol dehydrogenase 4)		HMGCS2	P54868		sterol transport (GO:0015918)	76	6	0.36	+	16.59	2.53e-06	0.000562
83	AMBP	259	1.6442	0	alpha-1-microglobulin/bikunin precursor		HABP2	Q14520		protein-lipid complex subunit organization (GO:0071825)	53	4	0.25	+	15.86	0.000154	0.015
84	ABCG8	64241	1.6387	0.0001	ATP-binding cassette, sub-family G (WHITE), member 8		SLC17A2	O00624		negative regulation of lipid localization (GO:1905953)	54	4	0.26	+	15.57	0.000165	0.016
85	HNF1A	6927	1.635	0.0137	HNF1 homeobox A		LPA	P08519		tetrapyrrole metabolic process (GO:0033013)	70	5	0.33	+	15.01	2.85e-05	0.00402
86	SLC22A18AS	5003	1.6342	0.0008	solute carrier family 22 (organic cation transporter), member 18 antisense		FGA	P02671		cellular aldehyde metabolic process (GO:0006081)	57	4	0.27	+	14.75	0.000201	0.0192
87	HMGCS2	3158	1.6342	0.0011	3-hydroxy-3-methylglutaryl-CoA synthase 2 (mitochondrial)		HMGCL	P35914		secondary metabolic process (GO:0019748)	57	4	0.27	+	14.75	0.000201	0.0191	secondary metabolic process
88	HABP2	3026	1.6308	0.0005	hyaluronan binding protein 2		ASL	P04424		acute inflammatory response (GO:0002526)	72	5	0.34	+	14.59	3.24e-05	0.00441
89	SLC17A2	10246	1.6308	0.0005	solute carrier family 17 (sodium phosphate), member 2		ITIH2	P19823		pigment metabolic process (GO:0042440)	73	5	0.35	+	14.39	3.45e-05	0.00465
90	LPA	4018	1.63	0	lipoprotein, Lp(a)		ITIH1	P19827		regulation of response to wounding (GO:1903034)	162	11	0.77	+	14.27	6.05e-10	2.81e-07
91	FGA	2243	1.6283	0.0029	fibrinogen alpha chain		BPHL	Q86WA6		lipid homeostasis (GO:0055088)	149	10	0.71	+	14.1	4.23e-09	1.71e-06
92	HMGCL	3155	1.6233	0.0126	3-hydroxymethyl-3-methylglutaryl-CoA lyase		PRODH2	Q9UF12		cholesterol metabolic process (GO:0008203)	123	8	0.59	+	13.67	2.03e-07	6.04e-05	lipid metabolism, transport, absorption and homeostasis
93	ASL	435	1.62	0.0017	argininosuccinate lyase		ANGPTL3	Q9Y5C1		triglyceride metabolic process (GO:0006641)	78	5	0.37	+	13.47	4.66e-05	0.00588
94	ITIH2	3698	1.6167	0.0009	inter-alpha-trypsin inhibitor heavy chain 2		F2	P00734		response to fatty acid (GO:0070542)	65	4	0.31	+	12.93	0.000323	0.0283	lipid metabolism, transport, absorption and homeostasis
95	ITIH1	3697	1.6158	0.0001	inter-alpha-trypsin inhibitor heavy chain 1		UGT2B28	Q9BY64		secondary alcohol metabolic process (GO:1902652)	133	8	0.63	+	12.64	3.57e-07	0.000101
96	BPHL	670	1.615	0.0019	biphenyl hydrolase-like (serine hydrolase)					organic hydroxy compound transport (GO:0015850)	151	9	0.72	+	12.53	6.89e-08	2.17e-05
97	PRODH2	58510	1.615	0.0177	proline dehydrogenase (oxidase) 2					cellular amino acid catabolic process (GO:0009063)	103	6	0.49	+	12.24	1.32e-05	0.00217	aminoacid metabolism
98	ANGPTL3	27329	1.6133	0	angiopoietin-like 3					sterol metabolic process (GO:0016125)	139	8	0.66	+	12.1	4.91e-07	0.000134
99	F2	2147	1.6117	0.0019	coagulation factor II (thrombin)					steroid metabolic process (GO:0008202)	262	15	1.25	+	12.03	3.68e-12	3.63e-09
100	UGT2B28	54490	1.61	0.0001	UDP glucuronosyltransferase 2 family, polypeptide B28					acylglycerol metabolic process (GO:0006639)	105	6	0.5	+	12.01	1.47e-05	0.00234
										peroxisome organization (GO:0007031)	88	5	0.42	+	11.94	8.03e-05	0.00918	peroxisome organization
										neutral lipid metabolic process (GO:0006638)	106	6	0.5	+	11.9	1.54e-05	0.00243
										steroid biosynthetic process (GO:0006694)	126	7	0.6	+	11.68	3.29e-06	0.000701
										positive regulation of lipase activity (GO:0060193)	73	4	0.35	+	11.52	0.000491	0.0397
										glutamine family amino acid metabolic process (GO:0009064)	73	4	0.35	+	11.52	0.000491	0.0395	aminoacid metabolism
										platelet degranulation (GO:0002576)	128	7	0.61	+	11.49	3.63e-06	0.000764	wound healing and coagulation
										digestive system process (GO:0022600)	74	4	0.35	+	11.36	0.000516	0.0403
										regulation of plasma lipoprotein particle levels (GO:0097006)	75	4	0.36	+	11.21	0.000541	0.0419
										monocarboxylic acid catabolic process (GO:0072329)	115	6	0.55	+	10.96	2.4e-05	0.0036	secondary metabolic process
										acyl-CoA metabolic process (GO:0006637)	97	5	0.46	+	10.83	0.000125	0.0131
										thioester metabolic process (GO:0035383)	97	5	0.46	+	10.83	0.000125	0.013
										regulation of complement activation (GO:0030449)	117	6	0.56	+	10.78	2.63e-05	0.0038	wound healing and coagulation
										regulation of lipase activity (GO:0060191)	98	5	0.47	+	10.72	0.00013	0.0134
										organic hydroxy compound catabolic process (GO:1901616)	79	4	0.38	+	10.64	0.000653	0.0495	organic hydroxy compound catabolic process
										organic acid catabolic process (GO:0016054)	240	12	1.14	+	10.51	2.63e-09	1.12e-06
										regulation of humoral immune response (GO:0002920)	140	7	0.67	+	10.51	6.38e-06	0.0012
										carboxylic acid catabolic process (GO:0046395)	224	11	1.07	+	10.32	1.51e-08	5.41e-06
										isoprenoid metabolic process (GO:0006720)	143	7	0.68	+	10.29	7.28e-06	0.00132
										xenobiotic metabolic process (GO:0006805)	124	6	0.59	+	10.17	3.59e-05	0.0048	drug and xenobiotic metabolic process
										terpenoid metabolic process (GO:0006721)	124	6	0.59	+	10.17	3.59e-05	0.00476
										blood coagulation (GO:0007596)	298	14	1.42	+	9.87	2.45e-10	1.34e-07
										coagulation (GO:0050817)	300	14	1.43	+	9.81	2.67e-10	1.4e-07
										cellular response to xenobiotic stimulus (GO:0071466)	129	6	0.61	+	9.77	4.44e-05	0.00565
										hemostasis (GO:0007599)	302	14	1.44	+	9.74	2.9e-10	1.48e-07
										alpha-amino acid metabolic process (GO:1901605)	195	9	0.93	+	9.7	5.44e-07	0.000141
										positive regulation of lipid metabolic process (GO:0045834)	154	7	0.73	+	9.55	1.16e-05	0.00194
										response to xenobiotic stimulus (GO:0009410)	136	6	0.65	+	9.27	5.89e-05	0.00714
										diterpenoid metabolic process (GO:0016101)	114	5	0.54	+	9.22	0.000256	0.0228	lipid metabolism, transport, absorption and homeostasis
										cellular amino acid metabolic process (GO:0006520)	279	12	1.33	+	9.04	1.32e-08	4.84e-06
										monocarboxylic acid metabolic process (GO:0032787)	514	21	2.45	+	8.59	6.25e-14	1.1e-10
										negative regulation of endopeptidase activity (GO:0010951)	245	10	1.17	+	8.58	3.66e-07	0.000101	regulation of endopeptidase activity
										regulation of lipid transport (GO:0032368)	148	6	0.7	+	8.52	9.23e-05	0.0103
										negative regulation of peptidase activity (GO:0010466)	255	10	1.21	+	8.24	5.21e-07	0.000137
										small molecule catabolic process (GO:0044282)	409	16	1.95	+	8.22	1.54e-10	9e-08
										regulation of lipid localization (GO:1905952)	179	7	0.85	+	8.22	2.94e-05	0.0041
										cellular hormone metabolic process (GO:0034754)	129	5	0.61	+	8.15	0.000443	0.038	hormone metabolism
										antimicrobial humoral response (GO:0019730)	156	6	0.74	+	8.08	0.000122	0.0129
										organophosphate ester transport (GO:0015748)	132	5	0.63	+	7.96	0.00049	0.0399	organophosphate ester transport
										purine nucleoside bisphosphate metabolic process (GO:0034032)	133	5	0.63	+	7.9	0.000507	0.0404
										ribonucleoside bisphosphate metabolic process (GO:0033875)	133	5	0.63	+	7.9	0.000507	0.0402
										nucleoside bisphosphate metabolic process (GO:0033865)	133	5	0.63	+	7.9	0.000507	0.04
										liver development (GO:0001889)	136	5	0.65	+	7.73	0.000559	0.043	liver development
										hepaticobiliary system development (GO:0061008)	138	5	0.66	+	7.61	0.000596	0.0456
										alcohol metabolic process (GO:0006066)	332	12	1.58	+	7.6	8.3e-08	2.57e-05
										carboxylic acid transport (GO:0046942)	249	9	1.18	+	7.6	3.79e-06	0.000787
										lipid transport (GO:0006869)	364	13	1.73	+	7.51	2.63e-08	8.84e-06
										intracellular receptor signaling pathway (GO:0030522)	196	7	0.93	+	7.51	5.13e-05	0.00637	intracellular receptor signaling pathway
										lipid localization (GO:0010876)	398	14	1.89	+	7.39	8.82e-09	3.48e-06
										carboxylic acid metabolic process (GO:0019752)	828	29	3.94	+	7.36	2.04e-17	1.07e-13
										negative regulation of proteolysis (GO:0045861)	344	12	1.64	+	7.33	1.2e-07	3.65e-05
										monocarboxylic acid biosynthetic process (GO:0072330)	173	6	0.82	+	7.29	0.00021	0.0197
										organic hydroxy compound biosynthetic process (GO:1901617)	174	6	0.83	+	7.25	0.000216	0.0202
										protein processing (GO:0016485)	175	6	0.83	+	7.21	0.000223	0.0204
										wound healing (GO:0042060)	444	15	2.11	+	7.1	4.18e-09	1.74e-06
										response to carbohydrate (GO:0009743)	178	6	0.85	+	7.08	0.000244	0.0218	carbohydrate-related processes
										oxoacid metabolic process (GO:0043436)	861	29	4.1	+	7.08	5.55e-17	2.19e-13
										organic acid metabolic process (GO:0006082)	894	30	4.25	+	7.05	1.55e-17	1.22e-13
										organic hydroxy compound metabolic process (GO:1901615)	484	16	2.3	+	6.95	1.63e-09	7.14e-07
										lipid catabolic process (GO:0016042)	304	10	1.45	+	6.91	2.42e-06	0.000552
										sulfur compound metabolic process (GO:0006790)	369	12	1.76	+	6.83	2.5e-07	7.3e-05
										organic acid transport (GO:0015849)	281	9	1.34	+	6.73	9.74e-06	0.00171
										fatty acid metabolic process (GO:0006631)	327	10	1.56	+	6.43	4.52e-06	0.000915	lipid metabolism, transport, absorption and homeostasis
										regulation of body fluid levels (GO:0050878)	494	15	2.35	+	6.38	1.67e-08	5.85e-06
										cellular lipid catabolic process (GO:0044242)	200	6	0.95	+	6.3	0.000445	0.038
										organic anion transport (GO:0015711)	340	10	1.62	+	6.18	6.31e-06	0.0012
										response to toxic substance (GO:0009636)	240	7	1.14	+	6.13	0.000174	0.0168	drug and xenobiotic metabolic process
										response to wounding (GO:0009611)	543	15	2.58	+	5.81	5.59e-08	1.84e-05
										regulation of lipid metabolic process (GO:0019216)	403	11	1.92	+	5.74	4.24e-06	0.000868
										lipid metabolic process (GO:0006629)	1222	32	5.81	+	5.5	1.01e-15	3.17e-12
										humoral immune response (GO:0006959)	386	10	1.84	+	5.44	1.84e-05	0.00288
										carboxylic acid biosynthetic process (GO:0046394)	278	7	1.32	+	5.29	0.000415	0.0358
										small molecule biosynthetic process (GO:0044283)	558	14	2.66	+	5.27	5.02e-07	0.000134
										organic acid biosynthetic process (GO:0016053)	285	7	1.36	+	5.16	0.00048	0.0392
										negative regulation of hydrolase activity (GO:0051346)	455	11	2.17	+	5.08	1.29e-05	0.00214
										small molecule metabolic process (GO:0044281)	1623	39	7.72	+	5.05	3.88e-18	6.12e-14
										negative regulation of response to external stimulus (GO:0032102)	550	13	2.62	+	4.97	2.53e-06	0.00057
										regulation of endopeptidase activity (GO:0052548)	424	10	2.02	+	4.96	4.01e-05	0.00519
										cellular lipid metabolic process (GO:0044255)	975	22	4.64	+	4.74	1.13e-09	5.11e-07
										regulation of hormone levels (GO:0010817)	532	12	2.53	+	4.74	1.01e-05	0.00174
										glycerolipid metabolic process (GO:0046486)	400	9	1.9	+	4.73	0.000141	0.014
										regulation of peptidase activity (GO:0052547)	452	10	2.15	+	4.65	6.77e-05	0.0078
										lipid biosynthetic process (GO:0008610)	598	13	2.85	+	4.57	6.15e-06	0.0012
										regulation of proteolysis (GO:0030162)	734	13	3.49	+	3.72	5.07e-05	0.00634
										chemical homeostasis (GO:0048878)	1124	18	5.35	+	3.37	6.08e-06	0.0012
										organophosphate metabolic process (GO:0019637)	898	14	4.27	+	3.28	9.82e-05	0.0106
										regulation of anion transport (GO:0044070)	860	13	4.09	+	3.18	0.000239	0.0218
										negative regulation of multicellular organismal process (GO:0051241)	1002	15	4.77	+	3.15	8.46e-05	0.0096
										negative regulation of catalytic activity (GO:0043086)	814	12	3.87	+	3.1	0.000526	0.0408
										negative regulation of protein metabolic process (GO:0051248)	1056	15	5.02	+	2.99	0.00015	0.0147
										organic substance catabolic process (GO:1901575)	1761	25	8.38	+	2.98	5.88e-07	0.000149
										catabolic process (GO:0009056)	2084	27	9.92	+	2.72	1.09e-06	0.00026
										organic substance transport (GO:0071702)	2170	28	10.33	+	2.71	6.95e-07	0.000174
										regulation of response to external stimulus (GO:0032101)	1182	15	5.62	+	2.67	0.000493	0.0395
										anion transport (GO:0006820)	2287	28	10.88	+	2.57	1.96e-06	0.000456
										regulation of hydrolase activity (GO:0051336)	1308	16	6.22	+	2.57	0.000469	0.0385
										cellular catabolic process (GO:0044248)	1797	21	8.55	+	2.46	0.0001	0.0108
										homeostatic process (GO:0042592)	1659	19	7.89	+	2.41	0.000295	0.026
										ion transport (GO:0006811)	2881	29	13.71	+	2.12	5.9e-05	0.00711
										regulation of biological quality (GO:0065008)	4007	38	19.07	+	1.99	9.33e-06	0.00165
										organic cyclic compound metabolic process (GO:1901360)	3190	30	15.18	+	1.98	0.000202	0.0191
										primary metabolic process (GO:0044238)	7363	67	35.04	+	1.91	9.07e-11	5.72e-08
										metabolic process (GO:0008152)	8333	73	39.65	+	1.84	1.31e-11	1.15e-08
										organonitrogen compound metabolic process (GO:1901564)	5251	46	24.99	+	1.84	6.53e-06	0.0012
										organic substance metabolic process (GO:0071704)	7878	69	37.49	+	1.84	1.83e-10	1.03e-07
										transport (GO:0006810)	4501	39	21.42	+	1.82	6.74e-05	0.00782
										establishment of localization (GO:0051234)	4653	39	22.14	+	1.76	0.000142	0.014
										cellular metabolic process (GO:0044237)	7570	60	36.02	+	1.67	1.42e-06	0.000335
										biological_process (GO:0008150)	17850	96	84.94	+	1.13	0.000241	0.0219
										regulation of nucleobase-containing compound metabolic process (GO:0019219)	4007	6	19.07	-	0.31	0.000288	0.0256
										Unclassified (UNCLASSIFIED)	2745	2	13.06	-	0.15	0.000241	0.0218

## Sheet: Table 6 TMEM232
Query genes:							Gene Name	Entry		Analysis Type:	PANTHER Overrepresentation Test (Released 20210224)
Query Gene	Entrez ID	Coexpression Score	P-Value	Description			WDR78	Q5VTH9		Annotation Version and Release Date:	GO Ontology database DOI: 10.5281/zenodo.4495804 Released 2021-02-01
TMEM232	642987	-3.2	0.0025	transmembrane protein 232			COX8C	Q7Z4L0		Analyzed List:	Client Text Box Input (Homo sapiens)
Coexpressed genes:							ADGB	Q8N7X0		Reference List:	Homo sapiens (all genes in database)
Rank	Gene	Entrez ID	Coexpression Score	P-Value	Description		C1ORF101	Q5SY80		Test Type:	FISHER
1	WDR78	79819	2.525	0	WD repeat domain 78		TTC18	Q5T0N1		Correction:	FDR
2	LOC100289187	100289187	2.3614	0	transmembrane protein 225-like		ZCWPW2	Q504Y3		GO biological process complete	Homo sapiens - REFLIST (20595)	Client Text Box Input (93)	Client Text Box Input (expected)	Client Text Box Input (over/under)	Client Text Box Input (fold Enrichment)	Client Text Box Input (raw P-value)	Client Text Box Input (FDR)	Category
3	COX8C	341947	2.2657	0	cytochrome c oxidase subunit VIIIC		LRRC6	Q86X45		cerebrospinal fluid circulation (GO:0090660)	10	4	0.05	+	88.58	3.7e-07	0.000119	cilium movement
4	ADGB	79747	2.2	0	androglobin		GRK4	P32298		epithelial cilium movement involved in determination of left/right asymmetry (GO:0060287)	11	3	0.05	+	60.4	3.09e-05	0.00749	cilium movement
5	C1ORF101	257044	2.1937	0	chromosome 1 open reading frame 101		CCDC169	A6NNP5		outer dynein arm assembly (GO:0036158)	21	5	0.09	+	52.73	1.01e-07	3.87e-05	cilium assembly and organization
6	TTC18	118491	2.1937	0.0001	tetratricopeptide repeat domain 18		WDR63	Q8IWG1		axonemal dynein complex assembly (GO:0070286)	36	8	0.16	+	49.21	1.9e-11	1.67e-08
7	ZCWPW2	152098	2.1814	0	zinc finger, CW type with PWWP domain 2		ZMYND12	Q9H0C1		regulation of cilium beat frequency (GO:0003356)	14	3	0.06	+	47.45	5.71e-05	0.0131	cilium movement
8	LRRC6	23639	2.1762	0	leucine rich repeat containing 6		C14ORF45	Q8ND07		epithelial cilium movement involved in extracellular fluid movement (GO:0003351)	34	7	0.15	+	45.59	5.85e-10	3.85e-07
9	GRK4	2868	2.1475	0	G protein-coupled receptor kinase 4		EFCAB6	Q5THR3		motile cilium assembly (GO:0044458)	25	5	0.11	+	44.29	2.15e-07	7.53e-05	cilium assembly and organization
10	CCDC169	728591	2.1437	0	coiled-coil domain containing 169		SPAG6	O75602		extracellular transport (GO:0006858)	37	7	0.17	+	41.9	9.87e-10	6.23e-07
11	WDR63	126820	2.14	0.0001	WD repeat domain 63		ZNF677	Q86XU0		inner dynein arm assembly (GO:0036159)	16	3	0.07	+	41.52	8.09e-05	0.0177	cilium assembly and organization
12	ZMYND12	84217	2.1275	0	zinc finger, MYND-type containing 12		ARMC2	Q8NEN0		sperm axoneme assembly (GO:0007288)	22	4	0.1	+	40.26	5.3e-06	0.00149	cilium assembly and organization
13	C14ORF45	80127	2.1012	0.0011	chromosome 14 open reading frame 45		WDR69	Q8N136		cilium movement (GO:0003341)	144	23	0.65	+	35.37	3.51e-28	5.53e-24
14	EFCAB6	64800	2.0912	0.0001	EF-hand calcium binding domain 6		IQUB	Q8NA54		axoneme assembly (GO:0035082)	78	12	0.35	+	34.07	6.72e-15	9.64e-12
15	SPAG6	9576	2.0825	0	sperm associated antigen 6		CCDC11	Q96M91		cilium movement involved in cell motility (GO:0060294)	98	14	0.44	+	31.64	8.35e-17	2.64e-13
16	ZNF677	342926	2.0657	0	zinc finger protein 677		C7ORF45	Q8WWF3		sperm motility (GO:0097722)	90	12	0.41	+	29.53	3.17e-14	4.17e-11
17	ARMC2	84071	2.0338	0	armadillo repeat containing 2		ZNF391	Q9UJN7		flagellated sperm motility (GO:0030317)	90	12	0.41	+	29.53	3.17e-14	3.85e-11
18	WDR69	164781	2.015	0.0001	WD repeat domain 69		BBS5	Q8N3I7		cilium-dependent cell motility (GO:0060285)	111	14	0.5	+	27.93	4.07e-16	9.16e-13
19	IQUB	154865	2.0025	0.0001	IQ motif and ubiquitin domain containing		SLC9B1	Q4ZJI4		cilium or flagellum-dependent cell motility (GO:0001539)	111	14	0.5	+	27.93	4.07e-16	8.02e-13
20	CCDC11	220136	1.995	0.0001	coiled-coil domain containing 11		ANKRD7	Q92527		microtubule bundle formation (GO:0001578)	109	12	0.49	+	24.38	2.57e-13	2.89e-10
21	C7ORF45	136263	1.9837	0	chromosome 7 open reading frame 45		GOT1L1	Q8NHS2		protein localization to cilium (GO:0061512)	55	4	0.25	+	16.11	0.000144	0.0284	protein localization to cilium
22	ZNF391	346157	1.9814	0	zinc finger protein 391		TTC25	Q96NG3		microtubule-based movement (GO:0007018)	350	25	1.58	+	15.82	1.26e-22	9.97e-19
23	BBS5	129880	1.9813	0	Bardet-Biedl syndrome 5		SPATA7	Q9P0W8		spermatid development (GO:0007286)	155	11	0.7	+	15.72	2.2e-10	1.65e-07
24	SLC9B1	150159	1.9787	0	solute carrier family 9, subfamily B (NHA1, cation proton antiporter 1), member 1		WDR96	Q8NDM7		spermatid differentiation (GO:0048515)	161	11	0.73	+	15.13	3.22e-10	2.21e-07
25	ANKRD7	56311	1.965	0	ankyrin repeat domain 7		KIF2B	Q8N4N8		cilium organization (GO:0044782)	402	25	1.82	+	13.77	3.04e-21	1.6e-17
26	GOT1L1	137362	1.9638	0	glutamic-oxaloacetic transaminase 1-like 1		AGBL2	Q5U5Z8		cilium assembly (GO:0060271)	378	22	1.71	+	12.89	3.87e-18	1.52e-14
27	TTC25	83538	1.9525	0.0004	tetratricopeptide repeat domain 25		MDH1B	Q5I0G3		determination of left/right symmetry (GO:0007368)	122	7	0.55	+	12.71	1.89e-06	0.000584
28	SPATA7	55812	1.9475	0.0023	spermatogenesis associated 7		FBXO15	Q8NCQ5		determination of bilateral symmetry (GO:0009855)	127	7	0.57	+	12.21	2.44e-06	0.000725
29	WDR96	80217	1.9425	0.0003	WD repeat domain 96		C12ORF55	Q96N23		specification of symmetry (GO:0009799)	128	7	0.58	+	12.11	2.56e-06	0.000748
30	KIF2B	84643	1.94	0	kinesin family member 2B		C22ORF23	Q9BZE7		germ cell development (GO:0007281)	257	13	1.16	+	11.2	2.45e-10	1.75e-07
31	AGBL2	79841	1.9338	0	ATP/GTP binding protein-like 2		MAEL	Q96JY0		microtubule-based transport (GO:0099111)	191	9	0.86	+	10.43	2.94e-07	0.000101
32	MDH1B	130752	1.9288	0.0018	malate dehydrogenase 1B, NAD (soluble)		C2ORF73	Q8N5S3		plasma membrane bounded cell projection assembly (GO:0120031)	469	22	2.12	+	10.39	2.89e-16	7.61e-13
33	FBXO15	201456	1.9262	0.0001	F-box protein 15		C11ORF70	Q9BRQ4		cell projection assembly (GO:0030031)	485	22	2.19	+	10.05	5.64e-16	9.88e-13
34	C12ORF55	144535	1.9257	0	chromosome 12 open reading frame 55		CDKL3	Q8IVW4		cellular process involved in reproduction in multicellular organism (GO:0022412)	353	14	1.59	+	8.78	9.97e-10	6.05e-07
35	C22ORF23	84645	1.9238	0	chromosome 22 open reading frame 23		ANKRD45	Q5TZF3		spermatogenesis (GO:0007283)	548	18	2.47	+	7.27	6.12e-11	5.08e-08
36	MAEL	84944	1.9212	0	maelstrom homolog (Drosophila)		C20ORF144	Q9BQM9		microtubule-based process (GO:0007017)	803	26	3.63	+	7.17	1.97e-15	3.11e-12
37	C2ORF73	129852	1.9175	0.0002	chromosome 2 open reading frame 73		PRM2	P04554		male gamete generation (GO:0048232)	567	18	2.56	+	7.03	1.05e-10	8.26e-08
38	C11ORF70	85016	1.9088	0.0003	chromosome 11 open reading frame 70		OSCP1	Q8WVF1		organelle assembly (GO:0070925)	781	22	3.53	+	6.24	6.1e-12	6.02e-09
39	CDKL3	51265	1.9088	0.0027	cyclin-dependent kinase-like 3		FBXO36	Q8NEA4		gamete generation (GO:0007276)	694	18	3.13	+	5.74	2.41e-09	1.36e-06
40	ANKRD45	339416	1.9013	0	ankyrin repeat domain 45		AKAP3	O75969		microtubule cytoskeleton organization (GO:0000226)	566	14	2.56	+	5.48	3.07e-07	0.000103
41	C20ORF144	128864	1.8887	0.0001	chromosome 20 open reading frame 144		TTC29	Q8NA56		sexual reproduction (GO:0019953)	842	20	3.8	+	5.26	1.2e-09	6.99e-07
42	PRM2	5620	1.8875	0.0001	protamine 2		EFCAB5	A4FU69		plasma membrane bounded cell projection organization (GO:0120036)	1166	26	5.27	+	4.94	8.59e-12	7.97e-09
43	OSCP1	127700	1.8787	0.002	organic solute carrier partner 1		C2ORF42	Q9NWW7		cell projection organization (GO:0030030)	1212	27	5.47	+	4.93	3.13e-12	3.29e-09
44	FBXO36	130888	1.875	0	F-box protein 36		LMLN	Q96KR4		multicellular organismal reproductive process (GO:0048609)	822	18	3.71	+	4.85	3.11e-08	1.33e-05
45	AKAP3	10566	1.8737	0	A kinase (PRKA) anchor protein 3		ROPN1L	Q96C74		multicellular organism reproduction (GO:0032504)	841	18	3.8	+	4.74	4.36e-08	1.81e-05
46	TTC29	83894	1.87	0.0001	tetratricopeptide repeat domain 29		SOHLH2	Q9NX45		multi-organism reproductive process (GO:0044703)	999	20	4.51	+	4.43	2.03e-08	8.92e-06
47	EFCAB5	374786	1.8686	0.0024	EF-hand calcium binding domain 5		C6ORF165	Q8IYR0		developmental process involved in reproduction (GO:0003006)	956	19	4.32	+	4.4	5.47e-08	2.21e-05
48	C2ORF42	54980	1.8675	0.0018	chromosome 2 open reading frame 42		ALS2CR12	Q96Q35		multi-organism process (GO:0051704)	1067	20	4.82	+	4.15	5.91e-08	2.33e-05
49	TPTE2P6	374491	1.8587	0	transmembrane phosphoinositide 3-phosphatase and tensin homolog 2 pseudogene 6		PHF7	Q9BWX1		reproductive process (GO:0022414)	1432	24	6.47	+	3.71	1.75e-08	8.1e-06
50	LMLN	89782	1.855	0.001	leishmanolysin-like (metallopeptidase M8 family)		LRP2BP	Q9P2M1		reproduction (GO:0000003)	1435	24	6.48	+	3.7	1.82e-08	8.18e-06
51	ROPN1L	83853	1.8487	0.0004	rhophilin associated tail protein 1-like		ENTHD1	Q8IYW4		movement of cell or subcellular component (GO:0006928)	1591	26	7.18	+	3.62	6.26e-09	3.29e-06
52	SOHLH2	54937	1.8425	0	spermatogenesis and oogenesis specific basic helix-loop-helix 2		LINC00301	Q8NCQ3		localization of cell (GO:0051674)	1103	15	4.98	+	3.01	0.000132	0.0267
53	C6ORF165	154313	1.8425	0.0018	chromosome 6 open reading frame 165		TAF7L	Q5H9L4		cell motility (GO:0048870)	1103	15	4.98	+	3.01	0.000132	0.0263
54	ALS2CR12	130540	1.8388	0	amyotrophic lateral sclerosis 2 (juvenile) chromosome region, candidate 12		WDR66	Q8TBY9		cellular component assembly (GO:0022607)	2438	25	11.01	+	2.27	6.94e-05	0.0156
55	PHF7	51533	1.8375	0.0001	PHD finger protein 7		FAM120B	Q96EK7		biological regulation (GO:0065007)	12571	29	56.77	-	0.51	1.11e-08	5.45e-06
56	LRP2BP	55805	1.8362	0	LRP2 binding protein		C8ORF48	Q96LL4		regulation of cellular process (GO:0050794)	11302	26	51.04	-	0.51	1.82e-07	6.53e-05
57	ENTHD1	150350	1.835	0	ENTH domain containing 1		C11ORF65	Q8NCR3		regulation of biological process (GO:0050789)	11856	26	53.54	-	0.49	1.03e-08	5.23e-06
58	LINC00301	283197	1.8343	0.0006	long intergenic non-protein coding RNA 301		CAPZA3	Q96KX2		nitrogen compound metabolic process (GO:0006807)	6897	15	31.14	-	0.48	0.000241	0.0457
59	TAF7L	54457	1.8338	0	TAF7-like RNA polymerase II, TATA box binding protein (TBP)-associated factor, 50kDa		TSGA10	Q9BZW7		primary metabolic process (GO:0044238)	7363	16	33.25	-	0.48	0.000121	0.0249
60	WDR66	144406	1.8338	0.0001	WD repeat domain 66		IQCG	Q9H095		metabolic process (GO:0008152)	8333	17	37.63	-	0.45	6.33e-06	0.00175
61	FAM120B	84498	1.83	0.0007	family with sequence similarity 120B		CCT6B	Q92526		organic substance metabolic process (GO:0071704)	7878	16	35.57	-	0.45	1.43e-05	0.00383
62	C8ORF48	157773	1.8288	0	chromosome 8 open reading frame 48		FAM228B	P0C875		cellular metabolic process (GO:0044237)	7570	15	34.18	-	0.44	1.93e-05	0.00498
63	C11ORF65	160140	1.8188	0	chromosome 11 open reading frame 65		ARMC4	Q5T2S8		regulation of primary metabolic process (GO:0080090)	5892	11	26.61	-	0.41	0.000188	0.0362
64	CAPZA3	93661	1.81	0	capping protein (actin filament) muscle Z-line, alpha 3		FAM81B	Q96LP2		regulation of cellular metabolic process (GO:0031323)	6106	11	27.57	-	0.4	8.41e-05	0.0182
65	TSGA10	80705	1.81	0.0007	testis specific, 10		LRRC34	Q8IZ02		regulation of macromolecule metabolic process (GO:0060255)	6301	11	28.45	-	0.39	3.62e-05	0.0084
66	IQCG	84223	1.8062	0.0001	IQ motif containing G		C2ORF77	Q0VFZ6		regulation of metabolic process (GO:0019222)	6847	11	30.92	-	0.36	3.81e-06	0.00109
67	CCT6B	10693	1.8062	0	chaperonin containing TCP1, subunit 6B (zeta 2)		CCDC7	Q96M83		signal transduction (GO:0007165)	5138	8	23.2	-	0.34	9.48e-05	0.0202
68	FAM228B	375190	1.8043	0	family with sequence similarity 228, member B		DMRT1	Q9Y5R6		response to stimulus (GO:0050896)	8496	13	38.37	-	0.34	1.71e-08	8.15e-06
69	ARMC4	55130	1.8025	0.0002	armadillo repeat containing 4		ARMC3	Q5W041		signaling (GO:0023052)	5485	8	24.77	-	0.32	2.68e-05	0.00672
70	LOC643037	643037	1.8012	0.0001	uncharacterized LOC643037		SPATA6	Q9NWH7		cell communication (GO:0007154)	5572	8	25.16	-	0.32	1.72e-05	0.00453
71	LOC254312	254312	1.7986	0	uncharacterized LOC254312		PIH1D2	Q8WWB5		cellular response to stimulus (GO:0051716)	6770	9	30.57	-	0.29	3.17e-07	0.000104
72	FAM81B	153643	1.7925	0.0002	family with sequence similarity 81, member B		BBS12	Q6ZW61		positive regulation of cellular metabolic process (GO:0031325)	3238	3	14.62	-	0.21	0.000262	0.0491
73	LRRC34	151827	1.79	0	leucine rich repeat containing 34		LELP1	Q5T871		positive regulation of cellular process (GO:0048522)	5656	5	25.54	-	0.2	1.19e-07	4.48e-05
74	C2ORF77	129881	1.79	0.0007	chromosome 2 open reading frame 77		C4ORF47	A7E2U8		regulation of cell communication (GO:0010646)	3424	3	15.46	-	0.19	0.000114	0.0239
75	CCDC7	221016	1.785	0	coiled-coil domain containing 7		ALS2CR8	Q8N187		positive regulation of macromolecule metabolic process (GO:0010604)	3431	3	15.49	-	0.19	0.000114	0.0237
76	DMRT1	1761	1.785	0	doublesex and mab-3 related transcription factor 1		DNAI2	Q9GZS0		regulation of signaling (GO:0023051)	3459	3	15.62	-	0.19	7.47e-05	0.0166
77	ARMC3	219681	1.7838	0.001	armadillo repeat containing 3		NME5	P56597		positive regulation of metabolic process (GO:0009893)	3719	3	16.79	-	0.18	3.15e-05	0.00753
78	SPATA6	54558	1.7787	0.0013	spermatogenesis associated 6		ALS2CR11	Q53TS8		positive regulation of biological process (GO:0048518)	6244	5	28.2	-	0.18	4.45e-09	2.42e-06
79	PIH1D2	120379	1.775	0.0004	PIH1 domain containing 2		STARD6	P59095		regulation of response to stimulus (GO:0048583)	4240	3	19.15	-	0.16	2.03e-06	0.000617
80	BBS12	166379	1.7737	0.003	Bardet-Biedl syndrome 12		TEKT2	Q9UIF3		response to stress (GO:0006950)	3634	2	16.41	-	0.12	6.67e-06	0.00181
81	LELP1	149018	1.7725	0.0004	late cornified envelope-like proline-rich 1		WFDC3	Q8IUB2		response to chemical (GO:0042221)	4369	2	19.73	-	0.1	1.37e-07	5.02e-05
82	C4ORF47	441054	1.7713	0.0003	chromosome 4 open reading frame 47		RNF32	Q9H0A6		response to external stimulus (GO:0009605)	2508	1	11.33	-	0.09	0.000165	0.0322
83	ALS2CR8	79800	1.77	0.004	amyotrophic lateral sclerosis 2 (juvenile) chromosome region, candidate 8		YSK4	Q56UN5		cellular response to chemical stimulus (GO:0070887)	2898	1	13.09	-	0.08	2.93e-05	0.00722
84	DNAI2	64446	1.77	0.0014	dynein, axonemal, intermediate chain 2		FANK1	Q8TC84		response to organic substance (GO:0010033)	2995	0	13.52	-	< 0.01	8.22e-07	0.000259
85	NME5	8382	1.7675	0.0017	NME/NM23 family member 5		TMEM116	Q8NCL8		cellular response to organic substance (GO:0071310)	2331	0	10.53	-	< 0.01	2.24e-05	0.0057
86	ALS2CR11	151254	1.7613	0	amyotrophic lateral sclerosis 2 (juvenile) chromosome region, candidate 11		USP44	Q9H0E7		positive regulation of response to stimulus (GO:0048584)	2278	0	10.29	-	< 0.01	3.56e-05	0.00837
87	STARD6	147323	1.7587	0	StAR-related lipid transfer (START) domain containing 6		CCDC96	Q2M329
88	TEKT2	27285	1.755	0.0002	tektin 2 (testicular)		TTC21A	Q8NDW8
89	WFDC3	140686	1.7463	0.0003	WAP four-disulfide core domain 3		TSSK2	Q96PF2
90	RNF32	140545	1.7463	0	ring finger protein 32		TEKT1	Q969V4
91	YSK4	80122	1.745	0.0004	YSK4 Sps1/Ste20-related kinase homolog (S. cerevisiae)		C7ORF57	Q8NEG2
92	FANK1	92565	1.7425	0.0006	fibronectin type III and ankyrin repeat domains 1		TSSK4	Q6SA08
93	TMEM116	89894	1.7425	0.0023	transmembrane protein 116
94	USP44	84101	1.735	0	ubiquitin specific peptidase 44
95	CCDC96	257236	1.7337	0.0004	coiled-coil domain containing 96
96	TTC21A	199223	1.725	0.0025	tetratricopeptide repeat domain 21A
97	TSSK2	23617	1.7225	0.0008	testis-specific serine kinase 2
98	TEKT1	83659	1.72	0.0007	tektin 1
99	C7ORF57	136288	1.72	0.0001	chromosome 7 open reading frame 57
100	TSSK4	283629	1.7162	0	testis-specific serine kinase 4
