# Supplementary material for: Functionathon: a manual data mining workflow to generate functional hypotheses for uncharacterized human proteins and its application by undergraduate students
Source: Database (Oxford). 2021 Jul 28;2021:baab046. doi: 10.1093/database/baab046 (PMC8317215; doi:10.1093/database/baab046)
Supplement: baab046_Supp [file baab046_supp.zip › Table S6.xlsx]

## Sheet: Sheet1
Gene name	HPA antibodies	Available mouse mutants and IMPC status
C6orf118	HPA029787, HPA029789	Mice: 1700010I14Riktm2b(KOMP)Wtsi (Phenotyped) Mice and ES cells:1700010I14Riktm2a(KOMP)Wtsi ES cells: 1700010I14Riktm1a(KOMP)Wtsi ES cells: 1700010I14Riktm1e(KOMP)Wtsi
CXorf58	HPA031542, HPA031543, HPA031544	ES cells produced for the overlapping Fam90a1b gene (target intronic region of AL646049.1): Fam90a1btm1a(KOMP)Wtsi Fam90a1btm1e(KOMP)Wtsi Phenotyping currently not planned. MFI ES cells: 4930550C14Riktm1a(EUCOMM)Hmgu, 4930550C14Riktm1e(EUCOMM)Hmgu
TMEM232	HPA049386	Mice: Tmem232em1(IMPC)Wtsi ES cells: Tmem232tm1e(EUCOMM)Hmgu Phenotyping currently not planned
C7orf25	HPA020120, HPA049635	Production and phenotyping currently not planned
RSRP1	HPA067651, HPA058992 Interacting partners: CLK2: HPA055366, HPA059507; CLK3: HPA046817; CCNL1: HPA057911	ES cells: Rsrp1tm1(KOMP)Mbp, Rsrp1tm1(KOMP)Vlcg Phenotyping currently not planned
SMLR1	HPA066060 Interacting partner: BSCL2: HPA042394	Production and phenotyping currently not planned
TMEM53	HPA021134	Mice: Tmem53-/- (Phenotyped)(PMID: 33824347) ES cells: Tmem53tm1a(KOMP)Wtsi Phenotyping at IMPC currently not planned
